# Supplementary material for: Adaptive Evolution and Functional Redesign of Core Metabolic Proteins in Snakes
Source: PubMed Central journal article supplement (PMC2376058; doi:10.1371/journal.pone.0002201), 2008-05-21
Supplement: pone.0002201.s001.pdf [file pone.0002201.s001.pdf]

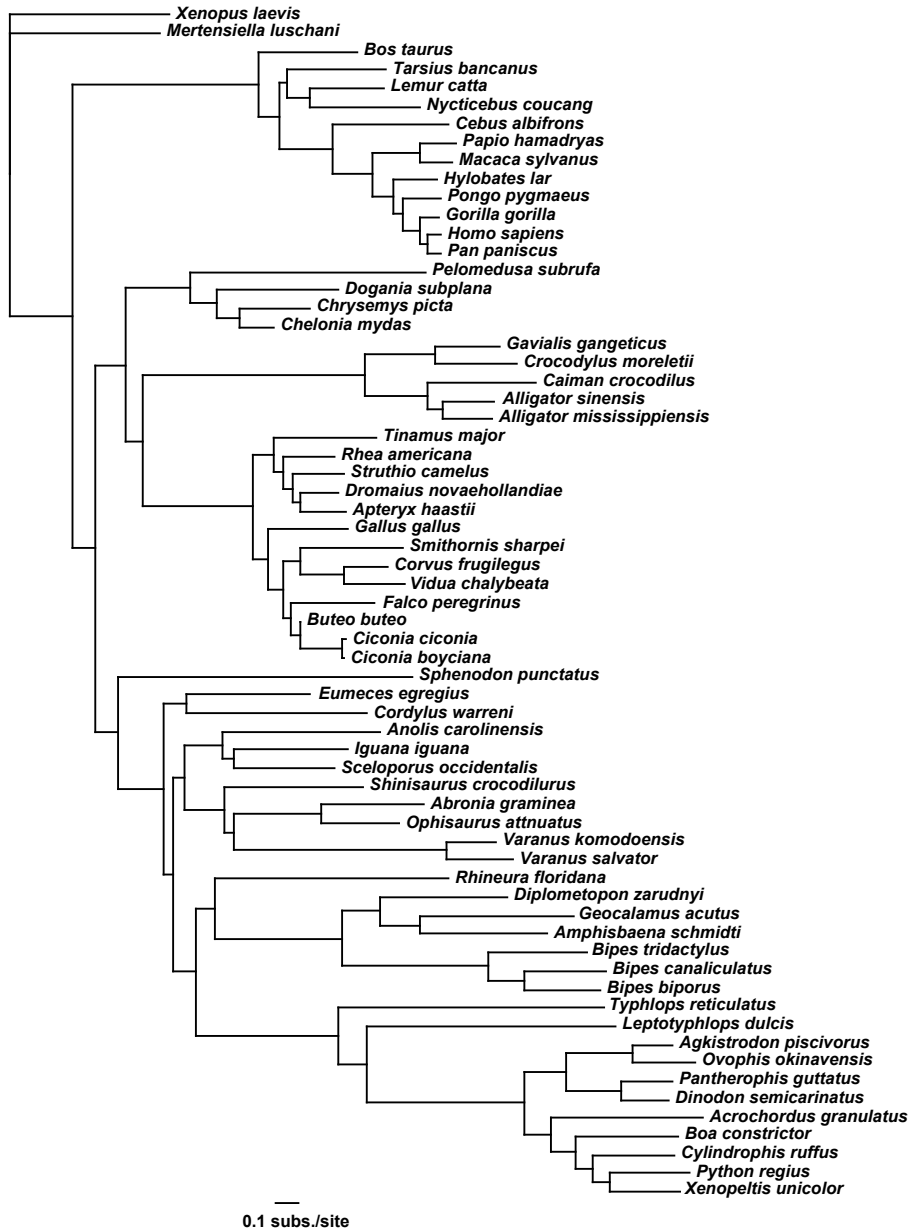

**Figure S1.** The phylogeny estimated from all 13 protein-coding genes from of all 65 mitochondrial genomes used in this study (Table S2), estimated using Bayesian mixed partitioned analyses (with 39 partitions). **NOTE:** All nodes received 100% Bayesian posterior probability support.
