# Supplementary material for: Adaptive Evolution and Functional Redesign of Core Metabolic Proteins in Snakes
Source: PubMed Central journal article supplement (PMC2376058; doi:10.1371/journal.pone.0002201), 2008-05-21
Supplement: pone.0002201.s003.pdf [file pone.0002201.s003.pdf]

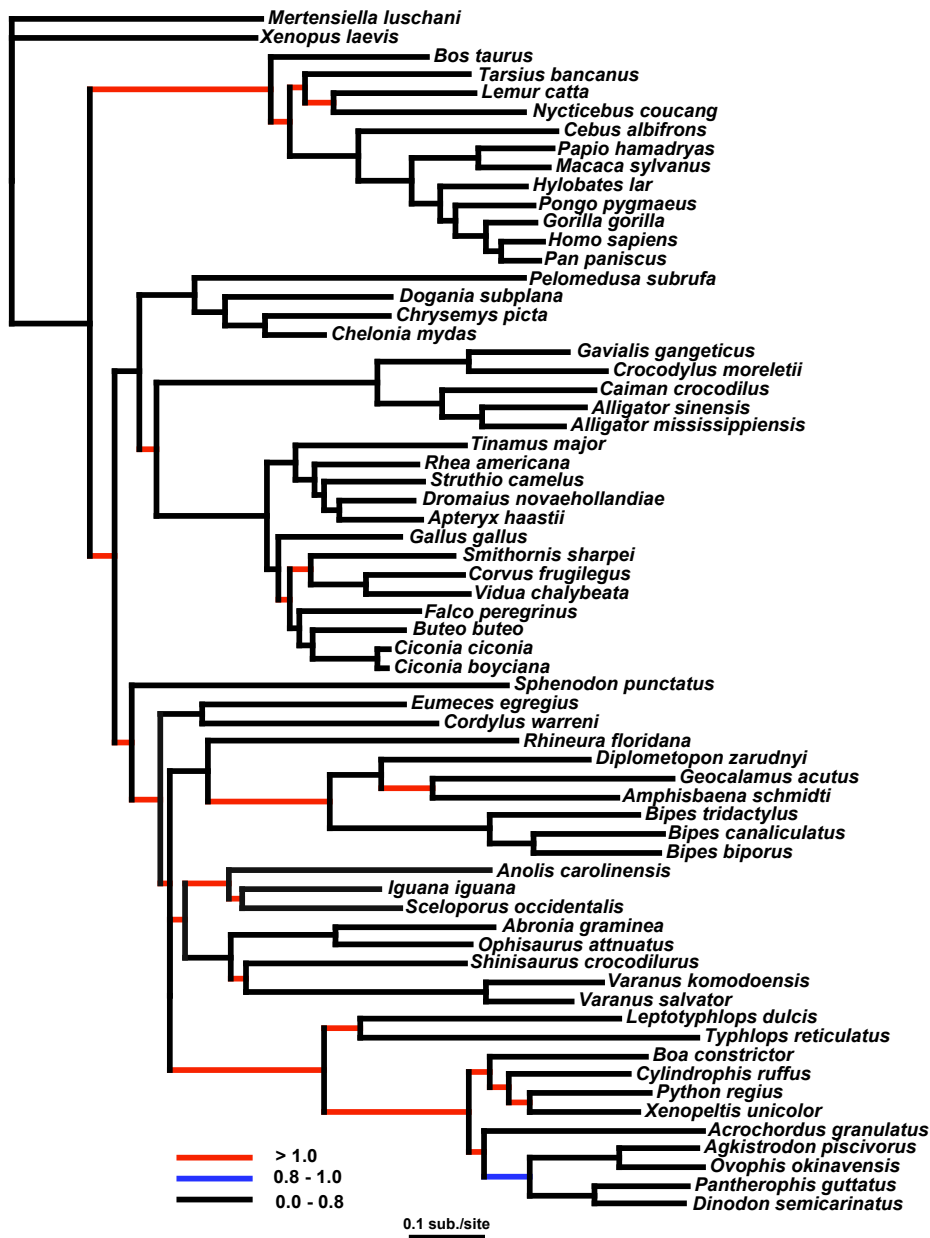

**Figure S3.** Results of traditional  $dN/dS$  estimates for the entire set of 13 mitochondrial protein-coding genes with branches colored based on  $dN/dS$  ratios. Branch lengths are based on all mitochondrial protein-coding genes, optimized on this topology in PAUP\* under a GTR $\Gamma$ I model. Estimates of  $dN/dS$  are from codon model-based analyses conducted HyPhy (See Supplementary Methods).
