# Supplementary material for: Adaptive Evolution and Functional Redesign of Core Metabolic Proteins in Snakes
Source: PubMed Central journal article supplement (PMC2376058; doi:10.1371/journal.pone.0002201), 2008-05-21
Supplement: pone.0002201.s004.pdf [file pone.0002201.s004.pdf]

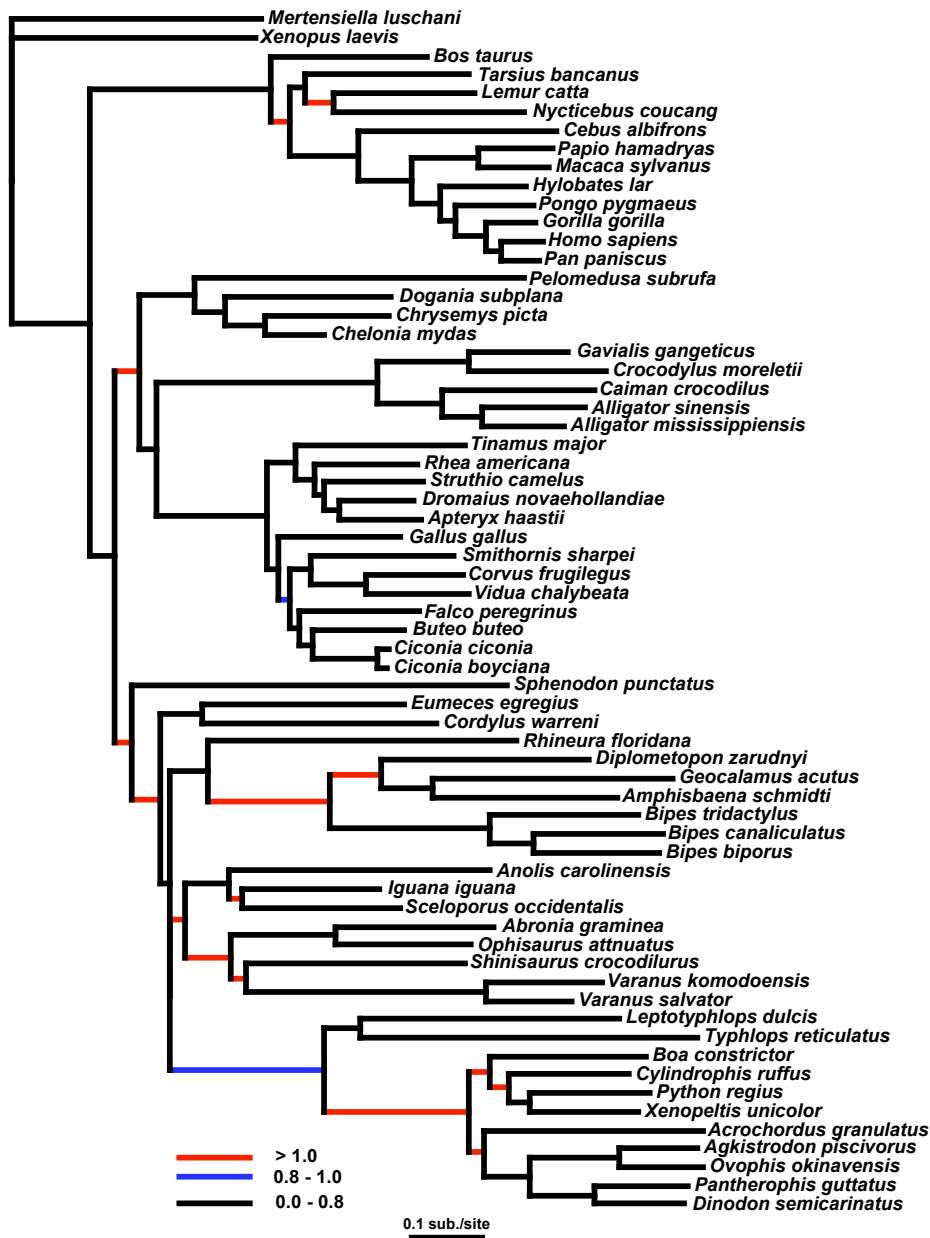

**Figure S4.** Results of traditional  $dN/dS$  estimates for the COI gene using the Fig. S3 phylogeny with branches colored based on  $dN/dS$  ratios. Estimates of  $dN/dS$  are from codon model-based analyses conducted HyPhy (See Supplementary Methods).
