# Supplementary material for: Adaptive Evolution and Functional Redesign of Core Metabolic Proteins in Snakes
Source: PubMed Central journal article supplement (PMC2376058; doi:10.1371/journal.pone.0002201), 2008-05-21
Supplement: pone.0002201.s009.pdf [file pone.0002201.s009.pdf]

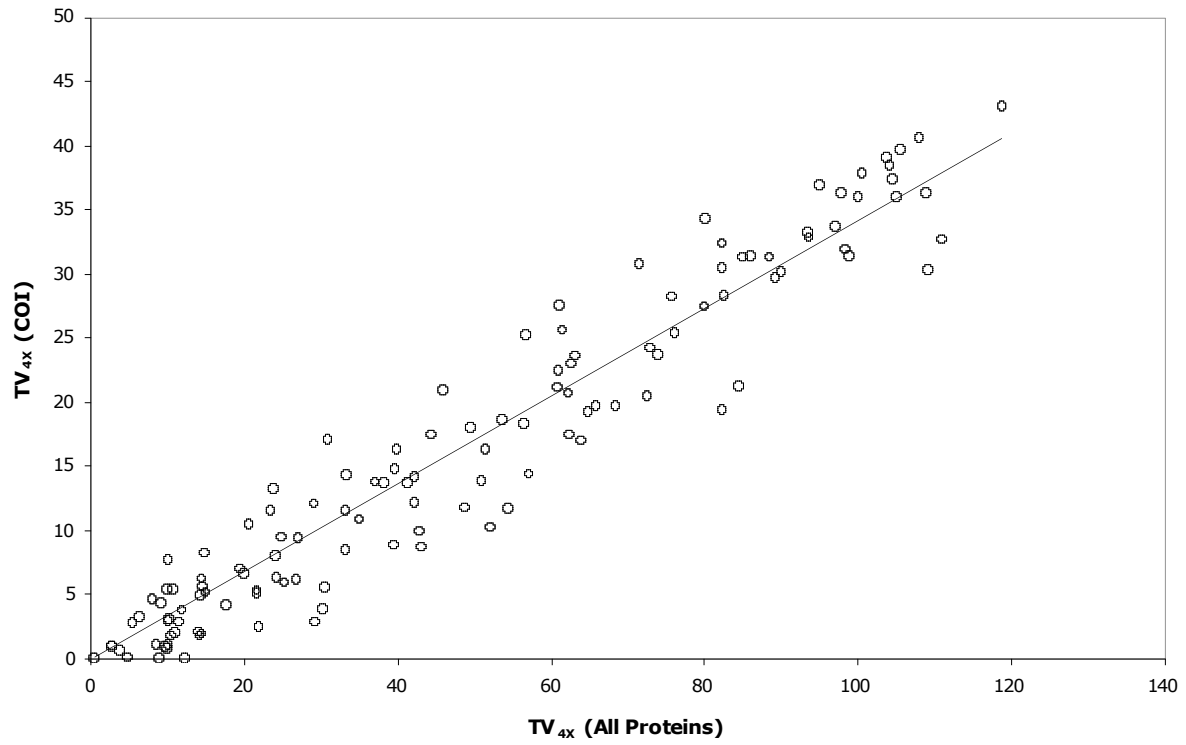

**Figure S9.** Correlation between the number of transversion substitutions at 4-fold redundant sites ( $TV_{4X}$ ) in all mitochondrial proteins versus  $dS_{TV_{4X}}$  COI. Each point represents a branch of the tree. Best-fit line:  $y = 0.3412X$ ,  $r^2 = 0.9288$ ,  $p < 0.001$ .
