# Supplementary material for: Adaptive Evolution and Functional Redesign of Core Metabolic Proteins in Snakes
Source: PubMed Central journal article supplement (PMC2376058; doi:10.1371/journal.pone.0002201), 2008-05-21
Supplement: pone.0002201.s014.pdf [file pone.0002201.s014.pdf]

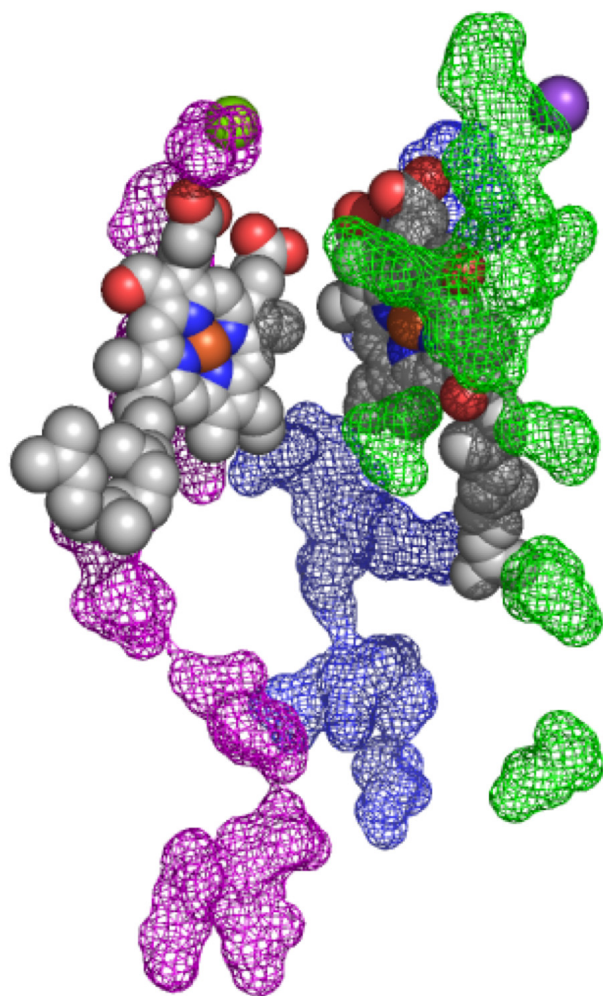

**Figure S14.** The three proposed proton transfer channels in COI. Channels are expressed by the electron density of amino acids assembling each channel. Channel identification is as follows: channel D (blue), channel H (green), and channel K (magenta).
