# Supplementary material for: Adaptive Evolution and Functional Redesign of Core Metabolic Proteins in Snakes
Source: PubMed Central journal article supplement (PMC2376058; doi:10.1371/journal.pone.0002201), 2008-05-21
Supplement: pone.0002201.s018.pdf [file pone.0002201.s018.pdf]

Online Alignment Supplement – Nucleic acid alignment of 13 mitochondrial protein-coding genes used for all analyses.

Coordinates for genes are as follows:

| Gene | Start Position | End Position |
|------|----------------|--------------|
| ATP6 | 1              | 729          |
| ATP8 | 730            | 999          |
| COX1 | 1000           | 2613         |
| COX2 | 2614           | 3321         |
| COX3 | 3322           | 4164         |
| CYTB | 4165           | 5403         |
| ND1  | 5404           | 6402         |
| ND2  | 6403           | 7497         |
| ND3  | 7498           | 7890         |
| ND4  | 7891           | 9339         |
| ND4L | 9340           | 9642         |
| ND5  | 9643           | 11676        |
| ND6  | 11677          | 12270        |



|                            |   |     |      |      |      |      |      |      |      |      |      |      |      |      |      |
|----------------------------|---|-----|------|------|------|------|------|------|------|------|------|------|------|------|------|
|                            |   | 140 | *    | 160  | *    | 180  | *    | 200  | *    | 220  | *    | 240  | *    | 260  |      |
| Bos_taurus                 | : | AAG | CAAT | CGCT | TTAA | CCCG | CCAA | CAAT | CTCA | CAAT | CTCA | CAAT | CTCA | CAAT | CTCA |
| Hylobates_lar              | : | TC  | AA   | CA   | CCG  | CA   | TA   | AT   | CC   | CA   | CCG  | CA   | TA   | AT   | CC   |
| Lemur_catta                | : | TC  | AA   | CA   | CCG  | CA   | TA   | AT   | CC   | CA   | CCG  | CA   | TA   | AT   | CC   |
| Nycticebus_coucang         | : | TC  | AA   | CA   | CCG  | CA   | TA   | AT   | CC   | CA   | CCG  | CA   | TA   | AT   | CC   |
| Tarsius_bancanus           | : | TC  | AA   | CA   | CCG  | CA   | TA   | AT   | CC   | CA   | CCG  | CA   | TA   | AT   | CC   |
| Gorilla_gorilla            | : | TC  | AA   | CA   | CCG  | CA   | TA   | AT   | CC   | CA   | CCG  | CA   | TA   | AT   | CC   |
| Homo_sapiens               | : | TC  | AA   | CA   | CCG  | CA   | TA   | AT   | CC   | CA   | CCG  | CA   | TA   | AT   | CC   |
| Papio_hamadryas            | : | TC  | AA   | CA   | CCG  | CA   | TA   | AT   | CC   | CA   | CCG  | CA   | TA   | AT   | CC   |
| Cebus_albifrons            | : | TC  | AA   | CA   | CCG  | CA   | TA   | AT   | CC   | CA   | CCG  | CA   | TA   | AT   | CC   |
| Macaca_sylvanus            | : | TC  | AA   | CA   | CCG  | CA   | TA   | AT   | CC   | CA   | CCG  | CA   | TA   | AT   | CC   |
| Pongo_pygmaeus             | : | TC  | AA   | CA   | CCG  | CA   | TA   | AT   | CC   | CA   | CCG  | CA   | TA   | AT   | CC   |
| Pan_paniscus               | : | TC  | AA   | CA   | CCG  | CA   | TA   | AT   | CC   | CA   | CCG  | CA   | TA   | AT   | CC   |
| Agkistrodon_piscivorus     | : | TC  | AA   | CA   | CCG  | CA   | TA   | AT   | CC   | CA   | CCG  | CA   | TA   | AT   | CC   |
| Pantherophis_guttatus      | : | TC  | AA   | CA   | CCG  | CA   | TA   | AT   | CC   | CA   | CCG  | CA   | TA   | AT   | CC   |
| Dinodon_semicarinatus      | : | TC  | AA   | CA   | CCG  | CA   | TA   | AT   | CC   | CA   | CCG  | CA   | TA   | AT   | CC   |
| Boa_constrictor            | : | TC  | AA   | CA   | CCG  | CA   | TA   | AT   | CC   | CA   | CCG  | CA   | TA   | AT   | CC   |
| Python_regius              | : | TC  | AA   | CA   | CCG  | CA   | TA   | AT   | CC   | CA   | CCG  | CA   | TA   | AT   | CC   |
| Acrochordus_granulatus     | : | TC  | AA   | CA   | CCG  | CA   | TA   | AT   | CC   | CA   | CCG  | CA   | TA   | AT   | CC   |
| Cylindrophis_ruffus        | : | TC  | AA   | CA   | CCG  | CA   | TA   | AT   | CC   | CA   | CCG  | CA   | TA   | AT   | CC   |
| Ovophis_okinavensis        | : | TC  | AA   | CA   | CCG  | CA   | TA   | AT   | CC   | CA   | CCG  | CA   | TA   | AT   | CC   |
| Xenopeltis_unicolor        | : | TC  | AA   | CA   | CCG  | CA   | TA   | AT   | CC   | CA   | CCG  | CA   | TA   | AT   | CC   |
| Typhlops_reticulatus       | : | TC  | AA   | CA   | CCG  | CA   | TA   | AT   | CC   | CA   | CCG  | CA   | TA   | AT   | CC   |
| Leptotyphlops_dulcis       | : | TC  | AA   | CA   | CCG  | CA   | TA   | AT   | CC   | CA   | CCG  | CA   | TA   | AT   | CC   |
| Caiman_crocodilus          | : | TC  | AA   | CA   | CCG  | CA   | TA   | AT   | CC   | CA   | CCG  | CA   | TA   | AT   | CC   |
| Alligator_sinensis         | : | TC  | AA   | CA   | CCG  | CA   | TA   | AT   | CC   | CA   | CCG  | CA   | TA   | AT   | CC   |
| Alligator_mississippiensis | : | TC  | AA   | CA   | CCG  | CA   | TA   | AT   | CC   | CA   | CCG  | CA   | TA   | AT   | CC   |
| Gavialis_gangeticus        | : | TC  | AA   | CA   | CCG  | CA   | TA   | AT   | CC   | CA   | CCG  | CA   | TA   | AT   | CC   |
| Crocodylus_moreletii       | : | TC  | AA   | CA   | CCG  | CA   | TA   | AT   | CC   | CA   | CCG  | CA   | TA   | AT   | CC   |
| Dogania_subplana           | : | TC  | AA   | CA   | CCG  | CA   | TA   | AT   | CC   | CA   | CCG  | CA   | TA   | AT   | CC   |
| Pelomedusa_subrufa         | : | TC  | AA   | CA   | CCG  | CA   | TA   | AT   | CC   | CA   | CCG  | CA   | TA   | AT   | CC   |
| Chrysemys_picta            | : | TC  | AA   | CA   | CCG  | CA   | TA   | AT   | CC   | CA   | CCG  | CA   | TA   | AT   | CC   |
| Chelonia_mydas             | : | TC  | AA   | CA   | CCG  | CA   | TA   | AT   | CC   | CA   | CCG  | CA   | TA   | AT   | CC   |
| Tinamus_major              | : | TC  | AA   | CA   | CCG  | CA   | TA   | AT   | CC   | CA   | CCG  | CA   | TA   | AT   | CC   |
| Smithornis_sharpei         | : | TC  | AA   | CA   | CCG  | CA   | TA   | AT   | CC   | CA   | CCG  | CA   | TA   | AT   | CC   |
| Corvus_frugilegus          | : | TC  | AA   | CA   | CCG  | CA   | TA   | AT   | CC   | CA   | CCG  | CA   | TA   | AT   | CC   |
| Vidua_chalybeata           | : | TC  | AA   | CA   | CCG  | CA   | TA   | AT   | CC   | CA   | CCG  | CA   | TA   | AT   | CC   |
| Buteo_buteo                | : | TC  | AA   | CA   | CCG  | CA   | TA   | AT   | CC   | CA   | CCG  | CA   | TA   | AT   | CC   |
| Falco_peregrinus           | : | TC  | AA   | CA   | CCG  | CA   | TA   | AT   | CC   | CA   | CCG  | CA   | TA   | AT   | CC   |
| Dromaius_novaeollandiae    | : | TC  | AA   | CA   | CCG  | CA   | TA   | AT   | CC   | CA   | CCG  | CA   | TA   | AT   | CC   |
| Struthio_camelus           | : | TC  | AA   | CA   | CCG  | CA   | TA   | AT   | CC   | CA   | CCG  | CA   | TA   | AT   | CC   |
| Apteryx_haastii            | : | TC  | AA   | CA   | CCG  | CA   | TA   | AT   | CC   | CA   | CCG  | CA   | TA   | AT   | CC   |
| Rhea_americanana           | : | TC  | AA   | CA   | CCG  | CA   | TA   | AT   | CC   | CA   | CCG  | CA   | TA   | AT   | CC   |
| Gallus_gallus              | : | TC  | AA   | CA   | CCG  | CA   | TA   | AT   | CC   | CA   | CCG  | CA   | TA   | AT   | CC   |
| Ciconia_ciconia            | : | TC  | AA   | CA   | CCG  | CA   | TA   | AT   | CC   | CA   | CCG  | CA   | TA   | AT   | CC   |
| Ciconia_boyciiana          | : | TC  | AA   | CA   | CCG  | CA   | TA   | AT   | CC   | CA   | CCG  | CA   | TA   | AT   | CC   |
| Iguana_iguana              | : | TC  | AA   | CA   | CCG  | CA   | TA   | AT   | CC   | CA   | CCG  | CA   | TA   | AT   | CC   |
| Fumeces_egregius           | : | TC  | AA   | CA   | CCG  | CA   | TA   | AT   | CC   | CA   | CCG  | CA   | TA   | AT   | CC   |
| Sphenodon_punctatus        | : | TC  | AA   | CA   | CCG  | CA   | TA   | AT   | CC   | CA   | CCG  | CA   | TA   | AT   | CC   |
| Sceloporus_occidentalis    | : | TC  | AA   | CA   | CCG  | CA   | TA   | AT   | CC   | CA   | CCG  | CA   | TA   | AT   | CC   |
| Cordylus_warreni           | : | TC  | AA   | CA   | CCG  | CA   | TA   | AT   | CC   | CA   | CCG  | CA   | TA   | AT   | CC   |
| Abronia_graminea           | : | TC  | AA   | CA   | CCG  | CA   | TA   | AT   | CC   | CA   | CCG  | CA   | TA   | AT   | CC   |
| Shinisaurus_crocodilurus   | : | TC  | AA   | CA   | CCG  | CA   | TA   | AT   | CC   | CA   | CCG  | CA   | TA   | AT   | CC   |
| Varanus_komodoensis        | : | TC  | AA   | CA   | CCG  | CA   | TA   | AT   | CC   | CA   | CCG  | CA   | TA   | AT   | CC   |
| Rhineura_floridana         | : | TC  | AA   | CA   | CCG  | CA   | TA   | AT   | CC   | CA   | CCG  | CA   | TA   | AT   | CC   |
| Geocalamus_acutus          | : | TC  | AA   | CA   | CCG  | CA   | TA   | AT   | CC   | CA   | CCG  | CA   | TA   | AT   | CC   |
| Diplometopon_zarudnyi      | : | TC  | AA   | CA   | CCG  | CA   | TA   | AT   | CC   | CA   | CCG  | CA   | TA   | AT   | CC   |
| Amphisbaena_schmidti       | : | TC  | AA   | CA   | CCG  | CA   | TA   | AT   | CC   | CA   | CCG  | CA   | TA   | AT   | CC   |
| Bipes_tridactylus          | : | TC  | AA   | CA   | CCG  | CA   | TA   | AT   | CC   | CA   | CCG  | CA   | TA   | AT   | CC   |
| Bipes_capaliculatus        | : | TC  | AA   | CA   | CCG  | CA   | TA   | AT   | CC   | CA   | CCG  | CA   | TA   | AT   | CC   |
| Bipes_biporus              | : | TC  | AA   | CA   | CCG  | CA   | TA   | AT   | CC   | CA   | CCG  | CA   | TA   | AT   | CC   |
| Anolis_carolinensis        | : | TC  | AA   | CA   | CCG  | CA   | TA   | AT   | CC   | CA   | CCG  | CA   | TA   | AT   | CC   |
| Ophisaurus_attenuatus      | : | TC  | AA   | CA   | CCG  | CA   | TA   | AT   | CC   | CA   | CCG  | CA   | TA   | AT   | CC   |
| Varanus_salvator           | : | TC  | AA   | CA   | CCG  | CA   | TA   | AT   | CC   | CA   | CCG  | CA   | TA   | AT   | CC   |
| Mertensiella_luschani      | : | TC  | AA   | CA   | CCG  | CA   | TA   | AT   | CC   | CA   | CCG  | CA   | TA   | AT   | CC   |
| Xenopus_laevis             | : | TC  | AA   | CA   | CCG  | CA   | TA   | AT   | CC   | CA   | CCG  | CA   | TA   | AT   | CC   |

```

*      280      *      300      *      320      *      340      *      360      *      380      *      400
Bos_taurus      : AAACCTAGTAGGCCATATACCCCAATCTTACACCAACAAACAAATATCAATAAAAGTAGGATAGCCATCCCTCTGGAGCGGGGCGTAATACGGTCCGCAATAAATAAAGATCAATGCC : 378
Hylobates_lar   : CAACCTCTAGGCCCTTACCCCAATCTTACACCAACAAACAAATATCAATAAAAGTAGGATAGCCATCCCTCTGGAGCGGGGCGTAATACGGTCCGCAATAAATAAAGATCAATGCC : 378
Lemur_catta     : TAATCTATAGGCCCTTACCCCAATCTTACACCAACAAACAAATATCAATAAAAGTAGGATAGCCATCCCTCTGGAGCGGGGCGTAATACGGTCCGCAATAAATAAAGATCAATGCC : 378
Nycticebus_coucang : TAATCTATAGGCCCTTACCCCAATCTTACACCAACAAACAAATATCAATAAAAGTAGGATAGCCATCCCTCTGGAGCGGGGCGTAATACGGTCCGCAATAAATAAAGATCAATGCC : 378
Tarsius_bancanus : AAATTAATAGGCCCTTACCCCAATCTTACACCAACAAACAAATATCAATAAAAGTAGGATAGCCATCCCTCTGGAGCGGGGCGTAATACGGTCCGCAATAAATAAAGATCAATGCC : 378
Gorilla_gorilla : CAACCTCTAGGCCCTTACCCCAATCTTACACCAACAAACAAATATCAATAAAAGTAGGATAGCCATCCCTCTGGAGCGGGGCGTAATACGGTCCGCAATAAATAAAGATCAATGCC : 378
Homo_sapiens   : TAACCTCTAGGCCCTTACCCCAATCTTACACCAACAAACAAATATCAATAAAAGTAGGATAGCCATCCCTCTGGAGCGGGGCGTAATACGGTCCGCAATAAATAAAGATCAATGCC : 378
Papio_hamadryas : TAACCTCTAGGCCCTTACCCCAATCTTACACCAACAAACAAATATCAATAAAAGTAGGATAGCCATCCCTCTGGAGCGGGGCGTAATACGGTCCGCAATAAATAAAGATCAATGCC : 378
Cebus_albifrons : CAACCTCTAGGCCCTTACCCCAATCTTACACCAACAAACAAATATCAATAAAAGTAGGATAGCCATCCCTCTGGAGCGGGGCGTAATACGGTCCGCAATAAATAAAGATCAATGCC : 378
Macaca_sylvanus : AAACCTCTAGGCCCTTACCCCAATCTTACACCAACAAACAAATATCAATAAAAGTAGGATAGCCATCCCTCTGGAGCGGGGCGTAATACGGTCCGCAATAAATAAAGATCAATGCC : 378
Pongo_pygmaeus : CAACCTCTAGGCCCTTACCCCAATCTTACACCAACAAACAAATATCAATAAAAGTAGGATAGCCATCCCTCTGGAGCGGGGCGTAATACGGTCCGCAATAAATAAAGATCAATGCC : 378
Pan_paniscus   : TAATCTATAGGCCCTTACCCCAATCTTACACCAACAAACAAATATCAATAAAAGTAGGATAGCCATCCCTCTGGAGCGGGGCGTAATACGGTCCGCAATAAATAAAGATCAATGCC : 378
Agkistrodon_piscivorus : CAACCTCTAGGCCCTTACCCCAATCTTACACCAACAAACAAATATCAATAAAAGTAGGATAGCCATCCCTCTGGAGCGGGGCGTAATACGGTCCGCAATAAATAAAGATCAATGCC : 378
Pantherophis_guttatus : AAACCTCTAGGCCCTTACCCCAATCTTACACCAACAAACAAATATCAATAAAAGTAGGATAGCCATCCCTCTGGAGCGGGGCGTAATACGGTCCGCAATAAATAAAGATCAATGCC : 378
Dinodon_semicarinatus : AAACCTCTAGGCCCTTACCCCAATCTTACACCAACAAACAAATATCAATAAAAGTAGGATAGCCATCCCTCTGGAGCGGGGCGTAATACGGTCCGCAATAAATAAAGATCAATGCC : 378
Boa_constrictor : AAACCTCTAGGCCCTTACCCCAATCTTACACCAACAAACAAATATCAATAAAAGTAGGATAGCCATCCCTCTGGAGCGGGGCGTAATACGGTCCGCAATAAATAAAGATCAATGCC : 378
Python_regius  : CAACCTCTAGGCCCTTACCCCAATCTTACACCAACAAACAAATATCAATAAAAGTAGGATAGCCATCCCTCTGGAGCGGGGCGTAATACGGTCCGCAATAAATAAAGATCAATGCC : 378
Acrochordus_granulatus : TAACCTCTAGGCCCTTACCCCAATCTTACACCAACAAACAAATATCAATAAAAGTAGGATAGCCATCCCTCTGGAGCGGGGCGTAATACGGTCCGCAATAAATAAAGATCAATGCC : 378
Chylindrophis_ruffus : TAACCTCTAGGCCCTTACCCCAATCTTACACCAACAAACAAATATCAATAAAAGTAGGATAGCCATCCCTCTGGAGCGGGGCGTAATACGGTCCGCAATAAATAAAGATCAATGCC : 378
Ovophis_okinavensis : CAACCTCTAGGCCCTTACCCCAATCTTACACCAACAAACAAATATCAATAAAAGTAGGATAGCCATCCCTCTGGAGCGGGGCGTAATACGGTCCGCAATAAATAAAGATCAATGCC : 378
Xenopeltis_unicolor : CAACCTCTAGGCCCTTACCCCAATCTTACACCAACAAACAAATATCAATAAAAGTAGGATAGCCATCCCTCTGGAGCGGGGCGTAATACGGTCCGCAATAAATAAAGATCAATGCC : 378
Typhlops_reticulatus : AAACCTCTAGGCCCTTACCCCAATCTTACACCAACAAACAAATATCAATAAAAGTAGGATAGCCATCCCTCTGGAGCGGGGCGTAATACGGTCCGCAATAAATAAAGATCAATGCC : 378
Leptotyphlops_dulcis : AAATCTATAGGCCCTTACCCCAATCTTACACCAACAAACAAATATCAATAAAAGTAGGATAGCCATCCCTCTGGAGCGGGGCGTAATACGGTCCGCAATAAATAAAGATCAATGCC : 378
Caiman_crocodilus : CAACCTCTAGGCCCTTACCCCAATCTTACACCAACAAACAAATATCAATAAAAGTAGGATAGCCATCCCTCTGGAGCGGGGCGTAATACGGTCCGCAATAAATAAAGATCAATGCC : 381
Alligator_sinensis : TAACCTCTAGGCCCTTACCCCAATCTTACACCAACAAACAAATATCAATAAAAGTAGGATAGCCATCCCTCTGGAGCGGGGCGTAATACGGTCCGCAATAAATAAAGATCAATGCC : 381
Alligator_mississippiensis : TAACCTCTAGGCCCTTACCCCAATCTTACACCAACAAACAAATATCAATAAAAGTAGGATAGCCATCCCTCTGGAGCGGGGCGTAATACGGTCCGCAATAAATAAAGATCAATGCC : 375
Gavialis_gangeticus : TAACCTCTAGGCCCTTACCCCAATCTTACACCAACAAACAAATATCAATAAAAGTAGGATAGCCATCCCTCTGGAGCGGGGCGTAATACGGTCCGCAATAAATAAAGATCAATGCC : 390
Crocodialis_moreletii : CAACCTCTAGGCCCTTACCCCAATCTTACACCAACAAACAAATATCAATAAAAGTAGGATAGCCATCCCTCTGGAGCGGGGCGTAATACGGTCCGCAATAAATAAAGATCAATGCC : 390
Dogania_subplana : TAATCTATAGGCCCTTACCCCAATCTTACACCAACAAACAAATATCAATAAAAGTAGGATAGCCATCCCTCTGGAGCGGGGCGTAATACGGTCCGCAATAAATAAAGATCAATGCC : 381
Pelomedusa_subrufa : CAACCTCTAGGCCCTTACCCCAATCTTACACCAACAAACAAATATCAATAAAAGTAGGATAGCCATCCCTCTGGAGCGGGGCGTAATACGGTCCGCAATAAATAAAGATCAATGCC : 381
Chrysemys_picta : TAATCTATAGGCCCTTACCCCAATCTTACACCAACAAACAAATATCAATAAAAGTAGGATAGCCATCCCTCTGGAGCGGGGCGTAATACGGTCCGCAATAAATAAAGATCAATGCC : 381
Chelonia_mydas : CAACCTCTAGGCCCTTACCCCAATCTTACACCAACAAACAAATATCAATAAAAGTAGGATAGCCATCCCTCTGGAGCGGGGCGTAATACGGTCCGCAATAAATAAAGATCAATGCC : 381
Tinamus_major : TAACCTCTAGGCCCTTACCCCAATCTTACACCAACAAACAAATATCAATAAAAGTAGGATAGCCATCCCTCTGGAGCGGGGCGTAATACGGTCCGCAATAAATAAAGATCAATGCC : 381
Smithornis_sharpei : CAACCTCTAGGCCCTTACCCCAATCTTACACCAACAAACAAATATCAATAAAAGTAGGATAGCCATCCCTCTGGAGCGGGGCGTAATACGGTCCGCAATAAATAAAGATCAATGCC : 381
Corvus_frugilegus : TAACCTCTAGGCCCTTACCCCAATCTTACACCAACAAACAAATATCAATAAAAGTAGGATAGCCATCCCTCTGGAGCGGGGCGTAATACGGTCCGCAATAAATAAAGATCAATGCC : 381
Vidua_chalybeata : CAACCTCTAGGCCCTTACCCCAATCTTACACCAACAAACAAATATCAATAAAAGTAGGATAGCCATCCCTCTGGAGCGGGGCGTAATACGGTCCGCAATAAATAAAGATCAATGCC : 381
Buteo_buteo    : CAACCTCTAGGCCCTTACCCCAATCTTACACCAACAAACAAATATCAATAAAAGTAGGATAGCCATCCCTCTGGAGCGGGGCGTAATACGGTCCGCAATAAATAAAGATCAATGCC : 381
Falco_peregrinus : CAACCTCTAGGCCCTTACCCCAATCTTACACCAACAAACAAATATCAATAAAAGTAGGATAGCCATCCCTCTGGAGCGGGGCGTAATACGGTCCGCAATAAATAAAGATCAATGCC : 381
Dromaius_novaeollandiae : TAACCTCTAGGCCCTTACCCCAATCTTACACCAACAAACAAATATCAATAAAAGTAGGATAGCCATCCCTCTGGAGCGGGGCGTAATACGGTCCGCAATAAATAAAGATCAATGCC : 381
Struthio_camelus : CAACCTCTAGGCCCTTACCCCAATCTTACACCAACAAACAAATATCAATAAAAGTAGGATAGCCATCCCTCTGGAGCGGGGCGTAATACGGTCCGCAATAAATAAAGATCAATGCC : 381
Apteryx_haastii : CAACCTCTAGGCCCTTACCCCAATCTTACACCAACAAACAAATATCAATAAAAGTAGGATAGCCATCCCTCTGGAGCGGGGCGTAATACGGTCCGCAATAAATAAAGATCAATGCC : 381
Rhea_americanana : TAATCTATAGGCCCTTACCCCAATCTTACACCAACAAACAAATATCAATAAAAGTAGGATAGCCATCCCTCTGGAGCGGGGCGTAATACGGTCCGCAATAAATAAAGATCAATGCC : 381
Gallus_gallus : TAACCTCTAGGCCCTTACCCCAATCTTACACCAACAAACAAATATCAATAAAAGTAGGATAGCCATCCCTCTGGAGCGGGGCGTAATACGGTCCGCAATAAATAAAGATCAATGCC : 381
Ciconia_ciconia : CAACCTCTAGGCCCTTACCCCAATCTTACACCAACAAACAAATATCAATAAAAGTAGGATAGCCATCCCTCTGGAGCGGGGCGTAATACGGTCCGCAATAAATAAAGATCAATGCC : 381
Ciconia_boycciana : CAACCTCTAGGCCCTTACCCCAATCTTACACCAACAAACAAATATCAATAAAAGTAGGATAGCCATCCCTCTGGAGCGGGGCGTAATACGGTCCGCAATAAATAAAGATCAATGCC : 381
Iguana_iguana  : AAATTAATAGGCCCTTACCCCAATCTTACACCAACAAACAAATATCAATAAAAGTAGGATAGCCATCCCTCTGGAGCGGGGCGTAATACGGTCCGCAATAAATAAAGATCAATGCC : 381
Fumeces_egregius : AAATTAATAGGCCCTTACCCCAATCTTACACCAACAAACAAATATCAATAAAAGTAGGATAGCCATCCCTCTGGAGCGGGGCGTAATACGGTCCGCAATAAATAAAGATCAATGCC : 381
Sphenodon_punctatus : AAATTAATAGGCCCTTACCCCAATCTTACACCAACAAACAAATATCAATAAAAGTAGGATAGCCATCCCTCTGGAGCGGGGCGTAATACGGTCCGCAATAAATAAAGATCAATGCC : 381
Sceloporus_occidentalis : CAACCTCTAGGCCCTTACCCCAATCTTACACCAACAAACAAATATCAATAAAAGTAGGATAGCCATCCCTCTGGAGCGGGGCGTAATACGGTCCGCAATAAATAAAGATCAATGCC : 381
Cordylus_warreni : AAACCTCTAGGCCCTTACCCCAATCTTACACCAACAAACAAATATCAATAAAAGTAGGATAGCCATCCCTCTGGAGCGGGGCGTAATACGGTCCGCAATAAATAAAGATCAATGCC : 381
Abronia_graminea : AAACCTCTAGGCCCTTACCCCAATCTTACACCAACAAACAAATATCAATAAAAGTAGGATAGCCATCCCTCTGGAGCGGGGCGTAATACGGTCCGCAATAAATAAAGATCAATGCC : 381
Shinisaurus_crocodilurus : CAACCTCTAGGCCCTTACCCCAATCTTACACCAACAAACAAATATCAATAAAAGTAGGATAGCCATCCCTCTGGAGCGGGGCGTAATACGGTCCGCAATAAATAAAGATCAATGCC : 378
Varanus_komodoensis : CAACCTCTAGGCCCTTACCCCAATCTTACACCAACAAACAAATATCAATAAAAGTAGGATAGCCATCCCTCTGGAGCGGGGCGTAATACGGTCCGCAATAAATAAAGATCAATGCC : 381
Rhinoceros_floridana : AAACCTCTAGGCCCTTACCCCAATCTTACACCAACAAACAAATATCAATAAAAGTAGGATAGCCATCCCTCTGGAGCGGGGCGTAATACGGTCCGCAATAAATAAAGATCAATGCC : 378
Geocalamus_acutus : AAACCTCTAGGCCCTTACCCCAATCTTACACCAACAAACAAATATCAATAAAAGTAGGATAGCCATCCCTCTGGAGCGGGGCGTAATACGGTCCGCAATAAATAAAGATCAATGCC : 378
Diplometopon_zarudnyi : AAATTAATAGGCCCTTACCCCAATCTTACACCAACAAACAAATATCAATAAAAGTAGGATAGCCATCCCTCTGGAGCGGGGCGTAATACGGTCCGCAATAAATAAAGATCAATGCC : 378
Amphisbaena_schmidti : CAACCTCTAGGCCCTTACCCCAATCTTACACCAACAAACAAATATCAATAAAAGTAGGATAGCCATCCCTCTGGAGCGGGGCGTAATACGGTCCGCAATAAATAAAGATCAATGCC : 378
Bipes_tridactylus : AAACCTCTAGGCCCTTACCCCAATCTTACACCAACAAACAAATATCAATAAAAGTAGGATAGCCATCCCTCTGGAGCGGGGCGTAATACGGTCCGCAATAAATAAAGATCAATGCC : 378
Bipes_canaliculatus : AAACCTCTAGGCCCTTACCCCAATCTTACACCAACAAACAAATATCAATAAAAGTAGGATAGCCATCCCTCTGGAGCGGGGCGTAATACGGTCCGCAATAAATAAAGATCAATGCC : 378
Bipes_biporus  : AAACCTCTAGGCCCTTACCCCAATCTTACACCAACAAACAAATATCAATAAAAGTAGGATAGCCATCCCTCTGGAGCGGGGCGTAATACGGTCCGCAATAAATAAAGATCAATGCC : 378
Anolis_carolinensis : AAATTAATAGGCCCTTACCCCAATCTTACACCAACAAACAAATATCAATAAAAGTAGGATAGCCATCCCTCTGGAGCGGGGCGTAATACGGTCCGCAATAAATAAAGATCAATGCC : 381
Ophisaurus_atnuatus : CAACCTCTAGGCCCTTACCCCAATCTTACACCAACAAACAAATATCAATAAAAGTAGGATAGCCATCCCTCTGGAGCGGGGCGTAATACGGTCCGCAATAAATAAAGATCAATGCC : 381
Varanus_salvator : CAACCTCTAGGCCCTTACCCCAATCTTACACCAACAAACAAATATCAATAAAAGTAGGATAGCCATCCCTCTGGAGCGGGGCGTAATACGGTCCGCAATAAATAAAGATCAATGCC : 381
Mertensiella_luschani : AAACCTCTAGGCCCTTACCCCAATCTTACACCAACAAACAAATATCAATAAAAGTAGGATAGCCATCCCTCTGGAGCGGGGCGTAATACGGTCCGCAATAAATAAAGATCAATGCC : 381
Xenopus_laevis : AAACCTCTAGGCCCTTACCCCAATCTTACACCAACAAACAAATATCAATAAAAGTAGGATAGCCATCCCTCTGGAGCGGGGCGTAATACGGTCCGCAATAAATAAAGATCAATGCC : 378

```



```

540      *      560      *      580      *      600      *      620      *      640      *      660
Bos_taurus          : TCCACCAGGGGGAACAGCTTCAATAAAGCATAGCCACCAAGNGTAAATACATTAAGCAATTAACCGTAAAGAAATAGAGTTCCAGTGGCTAAACCCNAGCCATAGATTCAG : 644
Hylobates_lar       : TACACCAGCGGACAGCCACAAAGAGCCTTAAACATTTAGCCATACCGGNACCCCCCTTAAAGCCCTTAAGTACCTTAATCTTAAACAACCCCTAGAAATCCGCGAGCCCTAAACCCAGCCATAGGCTTCAC : 644
Lemur_catta         : TACACTAATGGAGGGGCTACCTTAGATACTCCATCCATAGCCCGCGTACCGGCTCAATCCATTAATCCCTACCTTAAACATCCCTGAAATCCGCGTGGCCCTAAATCCNAGCCATAGGCTTCAC : 644
Nycticebus_coucang : TACACCAGCGGAGGGGCTTACAGAAATCTTAACTATAGCCATCGCGGGCTTAACTCCCTTAACTCTAAGCTTAAACATCCCTGAAATCCGCGTGGCCCTAAATCCNAGCCATAGGCTTCAC : 644
Tarsius_bancanus   : TACACCAGCGGAGGGGCTTACAGAAATCTTAACTATAGCCATCGCGGGCTTAACTCCCTTAACTCTAAGCTTAAACATCCCTGAAATCCGCGTGGCCCTAAATCCNAGCCATAGGCTTCAC : 644
Gorilla_gorilla    : TGCACCTAAAGGAGGGCCACCTAGAAATAACACCAACTCCCTTCAACATTAATTTATAGCTTAACTTAACTATACTAGAAATCCGCGTGGCCCTAAATCCNAGCCATAGGCTTCAC : 644
Homo_sapiens       : TGCACCTAAAGGAGGGCCACCTAGAAATAACACCAACTCCCTTCAACATTAATTTATAGCTTAACTTAACTATACTAGAAATCCGCGTGGCCCTAAATCCNAGCCATAGGCTTCAC : 644
Papio_hamadryas    : TGCACCTAAAGGAGAAATCTATGTAAACATTAACCAACTCAAACTCCACCCACCGATCTCCCTGTAAGCTTAACTATACTAGAAATCCGCGTGGCCCTAAATCCNAGCCATAGGCTTCAC : 644
Cebus_albifrons    : TGCACCTACAGGAGAACTATAATTAATCTTCTTCTTATTAAGCTTCCCTCCCGTAACCGGTAACCGGTAATCGTATAATTAATTAATCCCTAGAAATCCGCGTGGCCCTAAATCCNAGCCATAGGCTTCAC : 644
Macaca_sylvanus    : TACACTAATGGAAAGGCCACCTAGACATATCCCATCAACTCCCTCCCTAAACATTAATTTATAGCTTAACTATACTAGAAATCCGCGTGGCCCTAAATCCNAGCCATAGGCTTCAC : 644
Pongo_pygmaeus     : TGCACCTAAATGGAAAGGCCACCTAGACATATCCCATCAACTCCCTCCCTAAACATTAATTTATAGCTTAACTATACTAGAAATCCGCGTGGCCCTAAATCCNAGCCATAGGCTTCAC : 644
Pan_paniscus       : TGCACCTAAATGGAAAGGCCACCTAGACATATCCCATCAACTCCCTCCCTAAACATTAATTTATAGCTTAACTATACTAGAAATCCGCGTGGCCCTAAATCCNAGCCATAGGCTTCAC : 644
Agkistrodon_piscivorus : TAAACAATGGGGCTCCGCCACCATCAATCTAATTAACCACTACAGCTCTGCAGCTCCCTAGCATTAACCCCTTACTCTTACTCAACTCCCTAGAGCTCCGAGTGGCCCTGATCCNAGCCATAGGCTTCAC : 644
Pantherophis_guttatus : TAACTATAGTAGCCAGCCACACTTAAACCTTAAACAGACCCGCCATACCAAGGAACATAACATGACTAGACTTACTACTTCCCTATTAAGAACTAGGAGTGGCCCTGATCCNAGCCATAGGCTTCAC : 644
Dinodon_semicarinatus : TAACTATAGTAGCCAGCCACACTTAAACCTTAAACAGACCCGCCATACCAAGGAACATAACATGACTAGACTTACTACTTCCCTATTAAGAACTAGGAGTGGCCCTGATCCNAGCCATAGGCTTCAC : 644
Boa_constrictor    : TAACTATAGTAGCCAGCCAGCGCCCTTAAACCTTAAACAGACCCGCCATACCAAGGAACATAACATGACTAGACTTACTACTTCCCTATTAAGAACTAGGAGTGGCCCTGATCCNAGCCATAGGCTTCAC : 644
Python_regius      : TAACTATAGTAGCCAGCGCGCCCTTAAACCTTAAACAGACCCGCCATACCAAGGAACATAACATGACTAGACTTACTACTTCCCTATTAAGAACTAGGAGTGGCCCTGATCCNAGCCATAGGCTTCAC : 644
Acrochordus_granulatus : TAACTATAGTAGCCAGCGCGCCCTTAAACCTTAAACAGACCCGCCATACCAAGGAACATAACATGACTAGACTTACTACTTCCCTATTAAGAACTAGGAGTGGCCCTGATCCNAGCCATAGGCTTCAC : 644
Chylindrophis_ruffus : TAACTATAGTAGCCAGCGCGCCCTTAAACCTTAAACAGACCCGCCATACCAAGGAACATAACATGACTAGACTTACTACTTCCCTATTAAGAACTAGGAGTGGCCCTGATCCNAGCCATAGGCTTCAC : 644
Ovophis_okinavensis : TAACTATAGTAGCCAGCGCGCCCTTAAACCTTAAACAGACCCGCCATACCAAGGAACATAACATGACTAGACTTACTACTTCCCTATTAAGAACTAGGAGTGGCCCTGATCCNAGCCATAGGCTTCAC : 644
Xenopeltis_unicolor : TAACTATAGTAGCCAGCGCGCCCTTAAACCTTAAACAGACCCGCCATACCAAGGAACATAACATGACTAGACTTACTACTTCCCTATTAAGAACTAGGAGTGGCCCTGATCCNAGCCATAGGCTTCAC : 644
Typhlops_reticulatus : TCCACTATAGGGCCACCCACAAAGAGACTTCTAGACCCAAAACAATCTCCCTCCATACCTGTACCCCTTACTAGCCCTCCAGCTTCCCTAGAAAATCCGAGTGGCCCTGATCCNAGCCATAGGCTTCAC : 644
Leptotyphlops_dulcis : TTAGCATAAATGGCCATGGCCACATCAACTAATACAAAGCCATACCCGACACTCTAAACAAAGCCCTTAAAGCCCTGAGCTTCCCTAGAAAATCCGAGTGGCCCTGATCCNAGCCATAGGCTTCAC : 644
Caiman_crocodilus  : TCCACTATAGGGCCATGGCCACATCAACTAATACAAAGCCATACCCGACACTCTAAACAAAGCCCTTAAAGCCCTGAGCTTCCCTAGAAAATCCGAGTGGCCCTGATCCNAGCCATAGGCTTCAC : 644
Alligator_sinensis : TCCACTATAGGGCCATGGCCACATCAACTAATACAAAGCCATACCCGACACTCTAAACAAAGCCCTTAAAGCCCTGAGCTTCCCTAGAAAATCCGAGTGGCCCTGATCCNAGCCATAGGCTTCAC : 647
Alligator_mississippiensis : TCCACTATAGGGCCATGGCCACATCAACTAATACAAAGCCATACCCGACACTCTAAACAAAGCCCTTAAAGCCCTGAGCTTCCCTAGAAAATCCGAGTGGCCCTGATCCNAGCCATAGGCTTCAC : 641
Gavialis_gangeticus : TCCACTATAGGGCCATGGCCACATCAACTAATACAAAGCCATACCCGACACTCTAAACAAAGCCCTTAAAGCCCTGAGCTTCCCTAGAAAATCCGAGTGGCCCTGATCCNAGCCATAGGCTTCAC : 656
Crocodylus_moreletii : TCCACTATAGGGCCATGGCCACATCAACTAATACAAAGCCATACCCGACACTCTAAACAAAGCCCTTAAAGCCCTGAGCTTCCCTAGAAAATCCGAGTGGCCCTGATCCNAGCCATAGGCTTCAC : 656
Dogania_subplana   : TCCACTATAGGGCCATGGCCACATCAACTAATACAAAGCCATACCCGACACTCTAAACAAAGCCCTTAAAGCCCTGAGCTTCCCTAGAAAATCCGAGTGGCCCTGATCCNAGCCATAGGCTTCAC : 647
Pelomedusa_subrufa : TCCACTATAGGGCCATGGCCACATCAACTAATACAAAGCCATACCCGACACTCTAAACAAAGCCCTTAAAGCCCTGAGCTTCCCTAGAAAATCCGAGTGGCCCTGATCCNAGCCATAGGCTTCAC : 644
Chrysemys_picta    : TCCACTATAGGGCCATGGCCACATCAACTAATACAAAGCCATACCCGACACTCTAAACAAAGCCCTTAAAGCCCTGAGCTTCCCTAGAAAATCCGAGTGGCCCTGATCCNAGCCATAGGCTTCAC : 647
Chelonia_mydas     : TCCACTATAGGGCCATGGCCACATCAACTAATACAAAGCCATACCCGACACTCTAAACAAAGCCCTTAAAGCCCTGAGCTTCCCTAGAAAATCCGAGTGGCCCTGATCCNAGCCATAGGCTTCAC : 647
Tinamus_major      : TCCACTATAGGGCCATGGCCACATCAACTAATACAAAGCCATACCCGACACTCTAAACAAAGCCCTTAAAGCCCTGAGCTTCCCTAGAAAATCCGAGTGGCCCTGATCCNAGCCATAGGCTTCAC : 647
Smithornis_sharpei : TCCACTATAGGGCCATGGCCACATCAACTAATACAAAGCCATACCCGACACTCTAAACAAAGCCCTTAAAGCCCTGAGCTTCCCTAGAAAATCCGAGTGGCCCTGATCCNAGCCATAGGCTTCAC : 647
Corvus_frugilegus  : TCCACTATAGGGCCATGGCCACATCAACTAATACAAAGCCATACCCGACACTCTAAACAAAGCCCTTAAAGCCCTGAGCTTCCCTAGAAAATCCGAGTGGCCCTGATCCNAGCCATAGGCTTCAC : 647
Vidua_chalybeata   : TCCACTATAGGGCCATGGCCACATCAACTAATACAAAGCCATACCCGACACTCTAAACAAAGCCCTTAAAGCCCTGAGCTTCCCTAGAAAATCCGAGTGGCCCTGATCCNAGCCATAGGCTTCAC : 647
Buteo_buteo        : TCCACTATAGGGCCATGGCCACATCAACTAATACAAAGCCATACCCGACACTCTAAACAAAGCCCTTAAAGCCCTGAGCTTCCCTAGAAAATCCGAGTGGCCCTGATCCNAGCCATAGGCTTCAC : 647
Falco_peregrinus   : TCCACTATAGGGCCATGGCCACATCAACTAATACAAAGCCATACCCGACACTCTAAACAAAGCCCTTAAAGCCCTGAGCTTCCCTAGAAAATCCGAGTGGCCCTGATCCNAGCCATAGGCTTCAC : 647
Dromaius_novaeollandiae : TCCACTATAGGGCCATGGCCACATCAACTAATACAAAGCCATACCCGACACTCTAAACAAAGCCCTTAAAGCCCTGAGCTTCCCTAGAAAATCCGAGTGGCCCTGATCCNAGCCATAGGCTTCAC : 647
Struthio_camelus   : TCCACTATAGGGCCATGGCCACATCAACTAATACAAAGCCATACCCGACACTCTAAACAAAGCCCTTAAAGCCCTGAGCTTCCCTAGAAAATCCGAGTGGCCCTGATCCNAGCCATAGGCTTCAC : 647
Apteryx_haastii    : TCCACTATAGGGCCATGGCCACATCAACTAATACAAAGCCATACCCGACACTCTAAACAAAGCCCTTAAAGCCCTGAGCTTCCCTAGAAAATCCGAGTGGCCCTGATCCNAGCCATAGGCTTCAC : 647
Rhea_americanana  : TCCACTATAGGGCCATGGCCACATCAACTAATACAAAGCCATACCCGACACTCTAAACAAAGCCCTTAAAGCCCTGAGCTTCCCTAGAAAATCCGAGTGGCCCTGATCCNAGCCATAGGCTTCAC : 647
Gallus_gallus      : TCCACTATAGGGCCATGGCCACATCAACTAATACAAAGCCATACCCGACACTCTAAACAAAGCCCTTAAAGCCCTGAGCTTCCCTAGAAAATCCGAGTGGCCCTGATCCNAGCCATAGGCTTCAC : 647
Ciconia_ciconia    : TCCACTATAGGGCCATGGCCACATCAACTAATACAAAGCCATACCCGACACTCTAAACAAAGCCCTTAAAGCCCTGAGCTTCCCTAGAAAATCCGAGTGGCCCTGATCCNAGCCATAGGCTTCAC : 647
Ciconia_boyciana   : TCCACTATAGGGCCATGGCCACATCAACTAATACAAAGCCATACCCGACACTCTAAACAAAGCCCTTAAAGCCCTGAGCTTCCCTAGAAAATCCGAGTGGCCCTGATCCNAGCCATAGGCTTCAC : 647
Iguana_iguana      : TCCACTATAGGGCCATGGCCACATCAACTAATACAAAGCCATACCCGACACTCTAAACAAAGCCCTTAAAGCCCTGAGCTTCCCTAGAAAATCCGAGTGGCCCTGATCCNAGCCATAGGCTTCAC : 647
Fumeces_egregius   : TCCACTATAGGGCCATGGCCACATCAACTAATACAAAGCCATACCCGACACTCTAAACAAAGCCCTTAAAGCCCTGAGCTTCCCTAGAAAATCCGAGTGGCCCTGATCCNAGCCATAGGCTTCAC : 647
Sphenodon_punctatus : TCCACTATAGGGCCATGGCCACATCAACTAATACAAAGCCATACCCGACACTCTAAACAAAGCCCTTAAAGCCCTGAGCTTCCCTAGAAAATCCGAGTGGCCCTGATCCNAGCCATAGGCTTCAC : 647
Sceloporus_occidentalis : TCCACTATAGGGCCATGGCCACATCAACTAATACAAAGCCATACCCGACACTCTAAACAAAGCCCTTAAAGCCCTGAGCTTCCCTAGAAAATCCGAGTGGCCCTGATCCNAGCCATAGGCTTCAC : 647
Cordylus_warreni   : TCCACTATAGGGCCATGGCCACATCAACTAATACAAAGCCATACCCGACACTCTAAACAAAGCCCTTAAAGCCCTGAGCTTCCCTAGAAAATCCGAGTGGCCCTGATCCNAGCCATAGGCTTCAC : 647
Abronia_graminea   : TCCACTATAGGGCCATGGCCACATCAACTAATACAAAGCCATACCCGACACTCTAAACAAAGCCCTTAAAGCCCTGAGCTTCCCTAGAAAATCCGAGTGGCCCTGATCCNAGCCATAGGCTTCAC : 647
Shinisaurus_crocodilurus : TCCACTATAGGGCCATGGCCACATCAACTAATACAAAGCCATACCCGACACTCTAAACAAAGCCCTTAAAGCCCTGAGCTTCCCTAGAAAATCCGAGTGGCCCTGATCCNAGCCATAGGCTTCAC : 644
Varanus_komodoensis : TCCACTATAGGGCCATGGCCACATCAACTAATACAAAGCCATACCCGACACTCTAAACAAAGCCCTTAAAGCCCTGAGCTTCCCTAGAAAATCCGAGTGGCCCTGATCCNAGCCATAGGCTTCAC : 647
Rhineura_floridana : TCCACTATAGGGCCATGGCCACATCAACTAATACAAAGCCATACCCGACACTCTAAACAAAGCCCTTAAAGCCCTGAGCTTCCCTAGAAAATCCGAGTGGCCCTGATCCNAGCCATAGGCTTCAC : 644
Geocalamus_acutus  : TCCACTATAGGGCCATGGCCACATCAACTAATACAAAGCCATACCCGACACTCTAAACAAAGCCCTTAAAGCCCTGAGCTTCCCTAGAAAATCCGAGTGGCCCTGATCCNAGCCATAGGCTTCAC : 644
Diplometopon_zarudnyi : TCCACTATAGGGCCATGGCCACATCAACTAATACAAAGCCATACCCGACACTCTAAACAAAGCCCTTAAAGCCCTGAGCTTCCCTAGAAAATCCGAGTGGCCCTGATCCNAGCCATAGGCTTCAC : 644
Amphisbaena_schmidti : TCCACTATAGGGCCATGGCCACATCAACTAATACAAAGCCATACCCGACACTCTAAACAAAGCCCTTAAAGCCCTGAGCTTCCCTAGAAAATCCGAGTGGCCCTGATCCNAGCCATAGGCTTCAC : 644
Bipes_tridactylus  : TCCACTATAGGGCCATGGCCACATCAACTAATACAAAGCCATACCCGACACTCTAAACAAAGCCCTTAAAGCCCTGAGCTTCCCTAGAAAATCCGAGTGGCCCTGATCCNAGCCATAGGCTTCAC : 644
Bipes_canaliculatus : TCCACTATAGGGCCATGGCCACATCAACTAATACAAAGCCATACCCGACACTCTAAACAAAGCCCTTAAAGCCCTGAGCTTCCCTAGAAAATCCGAGTGGCCCTGATCCNAGCCATAGGCTTCAC : 644
Bipes_biporus      : TCCACTATAGGGCCATGGCCACATCAACTAATACAAAGCCATACCCGACACTCTAAACAAAGCCCTTAAAGCCCTGAGCTTCCCTAGAAAATCCGAGTGGCCCTGATCCNAGCCATAGGCTTCAC : 644
Anolis_carolinensis : TCCACTATAGGGCCATGGCCACATCAACTAATACAAAGCCATACCCGACACTCTAAACAAAGCCCTTAAAGCCCTGAGCTTCCCTAGAAAATCCGAGTGGCCCTGATCCNAGCCATAGGCTTCAC : 647
Ophisaurus_atnuatus : TCCACTATAGGGCCATGGCCACATCAACTAATACAAAGCCATACCCGACACTCTAAACAAAGCCCTTAAAGCCCTGAGCTTCCCTAGAAAATCCGAGTGGCCCTGATCCNAGCCATAGGCTTCAC : 647
Varanus_salvator    : TCCACTATAGGGCCATGGCCACATCAACTAATACAAAGCCATACCCGACACTCTAAACAAAGCCCTTAAAGCCCTGAGCTTCCCTAGAAAATCCGAGTGGCCCTGATCCNAGCCATAGGCTTCAC : 647
Mertensiella_luschani : TCCACTATAGGGCCATGGCCACATCAACTAATACAAAGCCATACCCGACACTCTAAACAAAGCCCTTAAAGCCCTGAGCTTCCCTAGAAAATCCGAGTGGCCCTGATCCNAGCCATAGGCTTCAC : 647
Xenopus_laevis     : TCCACTATAGGGCCATGGCCACATCAACTAATACAAAGCCATACCCGACACTCTAAACAAAGCCCTTAAAGCCCTGAGCTTCCCTAGAAAATCCGAGTGGCCCTGATCCNAGCCATAGGCTTCAC : 644

```

|                            | * | 680                             | * | 700 | * | 720 | * | 740   | * | 760                          | * | 780 | * | 8   |     |
|----------------------------|---|---------------------------------|---|-----|---|-----|---|-------|---|------------------------------|---|-----|---|-----|-----|
| Bos_taurus                 | : | ACCTCAGTACGCTTAAACGACGACAAACG   |   |     |   |     |   | AGCCG |   | AACAGCAAGCGAACAGGCGAACAATG   |   |     |   | GTG | 732 |
| Hylobates_lar              | : | ACCTCGGAGGCTTACCTCGAAGCAACAGG   |   |     |   |     |   | AGCCG |   | CAATTAACAACCCCGCTGCGCTACAATC |   |     |   | CTC | 732 |
| Lemur_catta                | : | ACCTAATGATAGCCTTACCTACAGCAAAATG |   |     |   |     |   | AGCCG |   | CAACTGACACATCAATGGCAATACAAAT |   |     |   | CTA | 732 |
| Nycticebus_coucang         | : | ACCTAGTACGCTTACCTACAGCAAAATG    |   |     |   |     |   | AGCCG |   | CAACTGACACATCAATGGCAATACAAAT |   |     |   | CTA | 732 |
| Tarsius_bancanus           | : | ACCTCAGTACGCTTACCTACAGCAAAATG   |   |     |   |     |   | AGCCG |   | CAACTGACACATCAATGGCAATACAAAT |   |     |   | CTA | 732 |
| Gorilla_gorilla            | : | ACCTTAGTACGCTTACCTACAGCAAAATG   |   |     |   |     |   | AGCCG |   | CAACTGACACATCAATGGCAATACAAAT |   |     |   | CTC | 732 |
| Homo_sapiens               | : | ACCTTAGTACGCTTACCTACAGCAAAATG   |   |     |   |     |   | AGCCG |   | CAACTGACACATCAATGGCAATACAAAT |   |     |   | CTC | 732 |
| Papio_hamadryas            | : | ACCTTAGTACGCTTACCTACAGCAAAATG   |   |     |   |     |   | AGCCG |   | CAACTGACACATCAATGGCAATACAAAT |   |     |   | CTC | 732 |
| Cebus_albifrons            | : | ACCTTAGTACGCTTACCTACAGCAAAATG   |   |     |   |     |   | AGCCG |   | CAACTGACACATCAATGGCAATACAAAT |   |     |   | CTA | 732 |
| Macaca_sylvanus            | : | ACCTTAGTACGCTTACCTACAGCAAAATG   |   |     |   |     |   | AGCCG |   | CAACTGACACATCAATGGCAATACAAAT |   |     |   | CTC | 732 |
| Pongo_pygmaeus             | : | ACCTTAGTACGCTTACCTACAGCAAAATG   |   |     |   |     |   | AGCCG |   | CAACTGACACATCAATGGCAATACAAAT |   |     |   | CTC | 732 |
| Pan_paniscus               | : | ACCTTAGTACGCTTACCTACAGCAAAATG   |   |     |   |     |   | AGCCG |   | CAACTGACACATCAATGGCAATACAAAT |   |     |   | CTC | 732 |
| Agkistrodon_piscivorus     | : | ACCTTAGTACGCTTACCTACAGCAAAATG   |   |     |   |     |   | AGCCG |   | CAACTGACACATCAATGGCAATACAAAT |   |     |   | ACT | 732 |
| Pantherophis_guttatus      | : | ACCTTAGTACGCTTACCTACAGCAAAATG   |   |     |   |     |   | AGCCG |   | CAACTGACACATCAATGGCAATACAAAT |   |     |   | ACT | 732 |
| Dinodon_semicarinatus      | : | ACCTTAGTACGCTTACCTACAGCAAAATG   |   |     |   |     |   | AGCCG |   | CAACTGACACATCAATGGCAATACAAAT |   |     |   | CTA | 732 |
| Boa_constrictor            | : | ACCTTAGTACGCTTACCTACAGCAAAATG   |   |     |   |     |   | AGCCG |   | CAACTGACACATCAATGGCAATACAAAT |   |     |   | CTA | 732 |
| Python_regius              | : | ACCTTAGTACGCTTACCTACAGCAAAATG   |   |     |   |     |   | AGCCG |   | CAACTGACACATCAATGGCAATACAAAT |   |     |   | CTC | 732 |
| Acrochordus_granulatus     | : | ACCTTAGTACGCTTACCTACAGCAAAATG   |   |     |   |     |   | AGCCG |   | CAACTGACACATCAATGGCAATACAAAT |   |     |   | GTG | 732 |
| Cylindrophis_ruffus        | : | ACCTTAGTACGCTTACCTACAGCAAAATG   |   |     |   |     |   | AGCCG |   | CAACTGACACATCAATGGCAATACAAAT |   |     |   | CTC | 732 |
| Ovophis_okinavensis        | : | ACCTTAGTACGCTTACCTACAGCAAAATG   |   |     |   |     |   | AGCCG |   | CAACTGACACATCAATGGCAATACAAAT |   |     |   | CTA | 732 |
| Xenopeltis_unicolor        | : | ACCTTAGTACGCTTACCTACAGCAAAATG   |   |     |   |     |   | AGCCG |   | CAACTGACACATCAATGGCAATACAAAT |   |     |   | CTA | 732 |
| Typhlops_reticulatus       | : | ACCTTAGTACGCTTACCTACAGCAAAATG   |   |     |   |     |   | AGCCG |   | CAACTGACACATCAATGGCAATACAAAT |   |     |   |     | 729 |
| Leptotyphlops_dulcis       | : | ACCTTAGTACGCTTACCTACAGCAAAATG   |   |     |   |     |   | AGCCG |   | CAACTGACACATCAATGGCAATACAAAT |   |     |   |     | 729 |
| Caiman_crocodilus          | : | ACCTTAGTACGCTTACCTACAGCAAAATG   |   |     |   |     |   | AGCCG |   | CAACTGACACATCAATGGCAATACAAAT |   |     |   | ACT | 735 |
| Alligator_sinensis         | : | ACCTTAGTACGCTTACCTACAGCAAAATG   |   |     |   |     |   | AGCCG |   | CAACTGACACATCAATGGCAATACAAAT |   |     |   | ACT | 735 |
| Alligator_mississippiensis | : | ACCTTAGTACGCTTACCTACAGCAAAATG   |   |     |   |     |   | AGCCG |   | CAACTGACACATCAATGGCAATACAAAT |   |     |   | ACT | 729 |
| Gavialis_gangeticus        | : | ACCTTAGTACGCTTACCTACAGCAAAATG   |   |     |   |     |   | AGCCG |   | CAACTGACACATCAATGGCAATACAAAT |   |     |   | CTG | 744 |
| Crocodylus_moreletii       | : | ACCTTAGTACGCTTACCTACAGCAAAATG   |   |     |   |     |   | AGCCG |   | CAACTGACACATCAATGGCAATACAAAT |   |     |   | CTA | 744 |
| Dogania_subplana           | : | ACCTTAGTACGCTTACCTACAGCAAAATG   |   |     |   |     |   | AGCCG |   | CAACTGACACATCAATGGCAATACAAAT |   |     |   | CTA | 735 |
| Pelomedusa_subrufa         | : | ACCTTAGTACGCTTACCTACAGCAAAATG   |   | AAA |   |     |   | AGCCG |   | CAACTGACACATCAATGGCAATACAAAT |   |     |   | CTG | 738 |
| Chrysemys_picta            | : | ACCTTAGTACGCTTACCTACAGCAAAATG   |   |     |   |     |   | AGCCG |   | CAACTGACACATCAATGGCAATACAAAT |   |     |   | CTA | 735 |
| Chelonia_mydas             | : | ACCTTAGTACGCTTACCTACAGCAAAATG   |   |     |   |     |   | AGCCG |   | CAACTGACACATCAATGGCAATACAAAT |   |     |   | CTA | 735 |
| Tinamus_major              | : | ACCTTAGTACGCTTACCTACAGCAAAATG   |   |     |   |     |   | AGCCG |   | CAACTGACACATCAATGGCAATACAAAT |   |     |   | CTA | 735 |
| Smithornis_sharpei         | : | ACCTTAGTACGCTTACCTACAGCAAAATG   |   |     |   |     |   | AGCCG |   | CAACTGACACATCAATGGCAATACAAAT |   |     |   | CTA | 735 |
| Corvus_frugilegus          | : | ACCTTAGTACGCTTACCTACAGCAAAATG   |   |     |   |     |   | AGCCG |   | CAACTGACACATCAATGGCAATACAAAT |   |     |   | CTC | 735 |
| Vidua_chalybeata           | : | ACCTTAGTACGCTTACCTACAGCAAAATG   |   |     |   |     |   | AGCCG |   | CAACTGACACATCAATGGCAATACAAAT |   |     |   | CTC | 735 |
| Buteo_buteo                | : | ACCTTAGTACGCTTACCTACAGCAAAATG   |   |     |   |     |   | AGCCG |   | CAACTGACACATCAATGGCAATACAAAT |   |     |   | CTA | 735 |
| Falco_peregrinus           | : | ACCTTAGTACGCTTACCTACAGCAAAATG   |   |     |   |     |   | AGCCG |   | CAACTGACACATCAATGGCAATACAAAT |   |     |   | CTA | 735 |
| Dromaius_novaeollandiae    | : | ACCTTAGTACGCTTACCTACAGCAAAATG   |   |     |   |     |   | AGCCG |   | CAACTGACACATCAATGGCAATACAAAT |   |     |   | CTA | 735 |
| Struthio_camelus           | : | ACCTTAGTACGCTTACCTACAGCAAAATG   |   |     |   |     |   | AGCCG |   | CAACTGACACATCAATGGCAATACAAAT |   |     |   | CTA | 735 |
| Apteryx_haastii            | : | ACCTTAGTACGCTTACCTACAGCAAAATG   |   |     |   |     |   | AGCCG |   | CAACTGACACATCAATGGCAATACAAAT |   |     |   | CTA | 735 |
| Rhea_american              | : | ACCTTAGTACGCTTACCTACAGCAAAATG   |   |     |   |     |   | AGCCG |   | CAACTGACACATCAATGGCAATACAAAT |   |     |   | CTA | 735 |
| Gallus_gallus              | : | ACCTTAGTACGCTTACCTACAGCAAAATG   |   |     |   |     |   | AGCCG |   | CAACTGACACATCAATGGCAATACAAAT |   |     |   | CTC | 735 |
| Ciconia_ciconia            | : | ACCTTAGTACGCTTACCTACAGCAAAATG   |   |     |   |     |   | AGCCG |   | CAACTGACACATCAATGGCAATACAAAT |   |     |   | CTA | 735 |
| Ciconia_boyciana           | : | ACCTTAGTACGCTTACCTACAGCAAAATG   |   |     |   |     |   | AGCCG |   | CAACTGACACATCAATGGCAATACAAAT |   |     |   | CTA | 735 |
| Iguana_iguana              | : | ACCTTAGTACGCTTACCTACAGCAAAATG   |   |     |   |     |   | AGCCG |   | CAACTGACACATCAATGGCAATACAAAT |   |     |   | CTA | 735 |
| Eumeces_egregius           | : | ACCTTAGTACGCTTACCTACAGCAAAATG   |   |     |   |     |   | AGCCG |   | CAACTGACACATCAATGGCAATACAAAT |   |     |   | CTA | 735 |
| Sphenodon_punctatus        | : | ACCTTAGTACGCTTACCTACAGCAAAATG   |   |     |   |     |   | AGCCG |   | CAACTGACACATCAATGGCAATACAAAT |   |     |   | CTC | 735 |
| Sceloporus_occidentalis    | : | ACCTTAGTACGCTTACCTACAGCAAAATG   |   |     |   |     |   | AGCCG |   | CAACTGACACATCAATGGCAATACAAAT |   |     |   | CTC | 735 |
| Cordylus_warreni           | : | ACCTTAGTACGCTTACCTACAGCAAAATG   |   |     |   |     |   | AGCCG |   | CAACTGACACATCAATGGCAATACAAAT |   |     |   | CTC | 735 |
| Abronia_graminea           | : | ACCTTAGTACGCTTACCTACAGCAAAATG   |   |     |   |     |   | AGCCG |   | CAACTGACACATCAATGGCAATACAAAT |   |     |   | CTC | 735 |
| Shinisaurus_crocodilurus   | : | ACCTTAGTACGCTTACCTACAGCAAAATG   |   |     |   |     |   | AGCCG |   | CAACTGACACATCAATGGCAATACAAAT |   |     |   | CTC | 732 |
| Varanus_komodoensis        | : | ACCTTAGTACGCTTACCTACAGCAAAATG   |   |     |   |     |   | AGCCG |   | CAACTGACACATCAATGGCAATACAAAT |   |     |   | CTC | 735 |
| Rhineura_floridana         | : | ACCTTAGTACGCTTACCTACAGCAAAATG   |   |     |   |     |   | AGCCG |   | CAACTGACACATCAATGGCAATACAAAT |   |     |   | CTC | 732 |
| Geocalamus_acutus          | : | ACCTTAGTACGCTTACCTACAGCAAAATG   |   |     |   |     |   | AGCCG |   | CAACTGACACATCAATGGCAATACAAAT |   |     |   | CTC | 732 |
| Diplometopon_zarudnyi      | : | ACCTTAGTACGCTTACCTACAGCAAAATG   |   |     |   |     |   | AGCCG |   | CAACTGACACATCAATGGCAATACAAAT |   |     |   | CTC | 732 |
| Amphisbaena_schmidti       | : | ACCTTAGTACGCTTACCTACAGCAAAATG   |   |     |   |     |   | AGCCG |   | CAACTGACACATCAATGGCAATACAAAT |   |     |   | CTC | 732 |
| Bipes_tridactylus          | : | ACCTTAGTACGCTTACCTACAGCAAAATG   |   |     |   |     |   | AGCCG |   | CAACTGACACATCAATGGCAATACAAAT |   |     |   | CTC | 732 |
| Bipes_canaliculatus        | : | ACCTTAGTACGCTTACCTACAGCAAAATG   |   |     |   |     |   | AGCCG |   | CAACTGACACATCAATGGCAATACAAAT |   |     |   | CTC | 732 |
| Bipes_biporus              | : | ACCTTAGTACGCTTACCTACAGCAAAATG   |   |     |   |     |   | AGCCG |   | CAACTGACACATCAATGGCAATACAAAT |   |     |   | CTC | 732 |
| Anolis_carolinensis        | : | ACCTTAGTACGCTTACCTACAGCAAAATG   |   |     |   |     |   | AGCCG |   | CAACTGACACATCAATGGCAATACAAAT |   |     |   | CTC | 735 |
| Ophisaurus_attenuatus      | : | ACCTTAGTACGCTTACCTACAGCAAAATG   |   |     |   |     |   | AGCCG |   | CAACTGACACATCAATGGCAATACAAAT |   |     |   | CTA | 735 |
| Varanus_salvator           | : | ACCTTAGTACGCTTACCTACAGCAAAATG   |   |     |   |     |   | AGCCG |   | CAACTGACACATCAATGGCAATACAAAT |   |     |   | CTC | 735 |
| Mertensiella_luschani      | : | ACCTTAGTACGCTTACCTACAGCAAAATG   |   |     |   |     |   | AGCCG |   | CAACTGACACATCAATGGCAATACAAAT |   |     |   | CTC | 735 |
| Xenopus_laevis             | : | ACCTTAGTACGCTTACCTACAGCAAAATG   |   |     |   |     |   | AGCCG |   | CAACTGACACATCAATGGCAATACAAAT |   |     |   | CTC | 732 |







```

*      1080      *      1100      *      1120      *      1140      *      1160      *      1180      *      1
Bos_taurus      : AATGAGATTTGGGCGTGGCGGGTAGAGGAAACGGCTAAGCCCTAAATTCGCGGAAATGGCAACCCGGANCGCTGGGAGGACCAAACTACAAAGTAGTGAACCCGACAGGC 1062
Hylobates_lar  : ATACTACTATTTGGCGATGGCGGGGGTGGGCAGGGCTAAGCCCTCAATTCGCGGAAATGGCAACCCGGANCGCTGGGAGGACCAAACTACAAAGTAGTGAACCCGACAGGC 1068
Lemur_catta    : ATACTACTATTTGGCGATGGCGGGGAGGAGGAAACGGCTAAGCCCTCAATTCGCGGAAATGGCAACCCGGANCGCTGGGAGGACCAAACTACAAAGTAGTGAACCCGACAGGC 1068
Nycticebus_coucang : ATACTACTATTTGGGCGTGGCGGGGAGGAGGAAACGGCCAAAGCTCAATTCGCGGAAATGGCAACCCGGANCGCTGGGAGGACCAAACTACAAAGTAGTGAACCCGACAGGC 1065
Tarsius_bancanus : ATACTACTATTTGGGCGTGGCGGGGAGGAGGAAACGGCCAAAGCTCAATTCGCGGAAATGGCAACCCGGANCGCTGGGAGGACCAAACTACAAAGTAGTGAACCCGACAGGC 1065
Gorilla_gorilla : ATACTACTATTTGGGCGTGGCGGGGAGGAGGAAACGGCCAAAGCTCAATTCGCGGAAATGGCAACCCGGANCGCTGGGAGGACCAAACTACAAAGTAGTGAACCCGACAGGC 1068
Homo_sapiens   : ATACTACTATTTGGGCGTGGCGGGGAGGAGGAAACGGCCAAAGCTCAATTCGCGGAAATGGCAACCCGGANCGCTGGGAGGACCAAACTACAAAGTAGTGAACCCGACAGGC 1068
Papio_hamadryas : ATACTACTATTTGGGCGTGGCGGGGAGGAGGAAACGGCCAAAGCTCAATTCGCGGAAATGGCAACCCGGANCGCTGGGAGGACCAAACTACAAAGTAGTGAACCCGACAGGC 1068
Cebus_albifrons : ATACTACTATTTGGGCGTGGCGGGGAGGAGGAAACGGCCAAAGCTCAATTCGCGGAAATGGCAACCCGGANCGCTGGGAGGACCAAACTACAAAGTAGTGAACCCGACAGGC 1062
Macaca_sylvanus : ATACTACTATTTGGGCGTGGCGGGGAGGAGGAAACGGCCAAAGCTCAATTCGCGGAAATGGCAACCCGGANCGCTGGGAGGACCAAACTACAAAGTAGTGAACCCGACAGGC 1062
Pongo_pygmaeus : ATACTACTATTTGGGCGTGGCGGGGAGGAGGAAACGGCCAAAGCTCAATTCGCGGAAATGGCAACCCGGANCGCTGGGAGGACCAAACTACAAAGTAGTGAACCCGACAGGC 1068
Pan_paniscus   : ATACTACTATTTGGGCGTGGCGGGGAGGAGGAAACGGCCAAAGCTCAATTCGCGGAAATGGCAACCCGGANCGCTGGGAGGACCAAACTACAAAGTAGTGAACCCGACAGGC 1068
Agkistrodon_piscivorus : GATATTTATTTGGGCGATGGCGGGTAGGGGCGGGCCAAAGCTCAATTCGCGGAAATGGCAACCCGGANCGCTGGGAGGACCAAACTACAAAGTAGTGAACCCGACAGGC 1026
Pantherophis_guttatus : ATACTACTATTTGGGCGTGGCGGGGAGGAGGAAACGGCCAAAGCTCAATTCGCGGAAATGGCAACCCGGANCGCTGGGAGGACCAAACTACAAAGTAGTGAACCCGACAGGC 1020
Dinodon_semicarinatus : ATACTACTATTTGGGCGTGGCGGGGAGGAGGAAACGGCCAAAGCTCAATTCGCGGAAATGGCAACCCGGANCGCTGGGAGGACCAAACTACAAAGTAGTGAACCCGACAGGC 1020
Boa_constrictor : GATATTTATTTGGGCGATGGCGGGGAGGAGGAAACGGCCAAAGCTCAATTCGCGGAAATGGCAACCCGGANCGCTGGGAGGACCAAACTACAAAGTAGTGAACCCGACAGGC 1029
Python_regius  : ATACTACTATTTGGGCGTGGCGGGGAGGAGGAAACGGCCAAAGCTCAATTCGCGGAAATGGCAACCCGGANCGCTGGGAGGACCAAACTACAAAGTAGTGAACCCGACAGGC 1029
Acrochordus_granulatus : GATATTTATTTGGGCGATGGCGGGGAGGAGGAAACGGCCAAAGCTCAATTCGCGGAAATGGCAACCCGGANCGCTGGGAGGACCAAACTACAAAGTAGTGAACCCGACAGGC 1029
Xylorhynchus_ruffus : ATACTACTATTTGGGCGTGGCGGGGAGGAGGAAACGGCCAAAGCTCAATTCGCGGAAATGGCAACCCGGANCGCTGGGAGGACCAAACTACAAAGTAGTGAACCCGACAGGC 1029
Ovophis_okinavensis : ATACTACTATTTGGGCGTGGCGGGGAGGAGGAAACGGCCAAAGCTCAATTCGCGGAAATGGCAACCCGGANCGCTGGGAGGACCAAACTACAAAGTAGTGAACCCGACAGGC 1026
Xenopeltis_unicolor : ATACTACTATTTGGGCGTGGCGGGGAGGAGGAAACGGCCAAAGCTCAATTCGCGGAAATGGCAACCCGGANCGCTGGGAGGACCAAACTACAAAGTAGTGAACCCGACAGGC 1032
Typhlops_reticulatus : ATACTACTATTTGGGCGTGGCGGGGAGGAGGAAACGGCCAAAGCTCAATTCGCGGAAATGGCAACCCGGANCGCTGGGAGGACCAAACTACAAAGTAGTGAACCCGACAGGC 1023
Leptotyphlops_dulcis : GATATTTATTTGGGCGATGGCGGGTAGGGGCGGGCCAAAGCTCAATTCGCGGAAATGGCAACCCGGANCGCTGGGAGGACCAAACTACAAAGTAGTGAACCCGACAGGC 1023
Caiman_crocodilus : ATACTACTATTTGGGCGTGGCGGGGAGGAGGAAACGGCCAAAGCTCAATTCGCGGAAATGGCAACCCGGANCGCTGGGAGGACCAAACTACAAAGTAGTGAACCCGACAGGC 1035
Alligator_sinensis : ATACTACTATTTGGGCGTGGCGGGGAGGAGGAAACGGCCAAAGCTCAATTCGCGGAAATGGCAACCCGGANCGCTGGGAGGACCAAACTACAAAGTAGTGAACCCGACAGGC 1047
Alligator_mississippiensis : ATACTACTATTTGGGCGTGGCGGGGAGGAGGAAACGGCCAAAGCTCAATTCGCGGAAATGGCAACCCGGANCGCTGGGAGGACCAAACTACAAAGTAGTGAACCCGACAGGC 1020
Gavialis_gangeticus : ATATTTATTTGGGCGATGGCGGGTAGGGGCGGGCCAAAGCTCAATTCGCGGAAATGGCAACCCGGANCGCTGGGAGGACCAAACTACAAAGTAGTGAACCCGACAGGC 1035
Crocodylus_moreletii : GATATTTATTTGGGCGATGGCGGGTAGGGGCGGGCCAAAGCTCAATTCGCGGAAATGGCAACCCGGANCGCTGGGAGGACCAAACTACAAAGTAGTGAACCCGACAGGC 1035
Dogania_subplana : ATATTTATTTGGGCGATGGCGGGTAGGGGCGGGCCAAAGCTCAATTCGCGGAAATGGCAACCCGGANCGCTGGGAGGACCAAACTACAAAGTAGTGAACCCGACAGGC 1029
Pelomedusa_subrufa : ATACTACTATTTGGGCGTGGCGGGGAGGAGGAAACGGCCAAAGCTCAATTCGCGGAAATGGCAACCCGGANCGCTGGGAGGACCAAACTACAAAGTAGTGAACCCGACAGGC 1035
Chrysemys_picta : ATACTACTATTTGGGCGTGGCGGGGAGGAGGAAACGGCCAAAGCTCAATTCGCGGAAATGGCAACCCGGANCGCTGGGAGGACCAAACTACAAAGTAGTGAACCCGACAGGC 1053
Chelonia_mydas : ATACTACTATTTGGGCGTGGCGGGGAGGAGGAAACGGCCAAAGCTCAATTCGCGGAAATGGCAACCCGGANCGCTGGGAGGACCAAACTACAAAGTAGTGAACCCGACAGGC 1050
Tinamus_major : ATACTACTATTTGGGCGTGGCGGGGAGGAGGAAACGGCCAAAGCTCAATTCGCGGAAATGGCAACCCGGANCGCTGGGAGGACCAAACTACAAAGTAGTGAACCCGACAGGC 1035
Smithornis_sharpei : ATACTACTATTTGGGCGTGGCGGGGAGGAGGAAACGGCCAAAGCTCAATTCGCGGAAATGGCAACCCGGANCGCTGGGAGGACCAAACTACAAAGTAGTGAACCCGACAGGC 1035
Corvus_chalybeatus : GATATTTATTTGGGCGATGGCGGGTAGGGGCGGGCCAAAGCTCAATTCGCGGAAATGGCAACCCGGANCGCTGGGAGGACCAAACTACAAAGTAGTGAACCCGACAGGC 1035
Vidua_chalybeata : ATACTACTATTTGGGCGTGGCGGGGAGGAGGAAACGGCCAAAGCTCAATTCGCGGAAATGGCAACCCGGANCGCTGGGAGGACCAAACTACAAAGTAGTGAACCCGACAGGC 1035
Buteo_buteo    : ATACTACTATTTGGGCGTGGCGGGGAGGAGGAAACGGCCAAAGCTCAATTCGCGGAAATGGCAACCCGGANCGCTGGGAGGACCAAACTACAAAGTAGTGAACCCGACAGGC 1035
Falco_peregrinus : ATACTACTATTTGGGCGTGGCGGGGAGGAGGAAACGGCCAAAGCTCAATTCGCGGAAATGGCAACCCGGANCGCTGGGAGGACCAAACTACAAAGTAGTGAACCCGACAGGC 1035
Dromaius_novaeollandiae : ATACTACTATTTGGGCGTGGCGGGGAGGAGGAAACGGCCAAAGCTCAATTCGCGGAAATGGCAACCCGGANCGCTGGGAGGACCAAACTACAAAGTAGTGAACCCGACAGGC 1035
Struthio_camelus : ATACTACTATTTGGGCGTGGCGGGGAGGAGGAAACGGCCAAAGCTCAATTCGCGGAAATGGCAACCCGGANCGCTGGGAGGACCAAACTACAAAGTAGTGAACCCGACAGGC 1035
Apteryx_haastii : ATACTACTATTTGGGCGTGGCGGGGAGGAGGAAACGGCCAAAGCTCAATTCGCGGAAATGGCAACCCGGANCGCTGGGAGGACCAAACTACAAAGTAGTGAACCCGACAGGC 1035
Rhea_americanana : GATATTTATTTGGGCGATGGCGGGTAGGGGCGGGCCAAAGCTCAATTCGCGGAAATGGCAACCCGGANCGCTGGGAGGACCAAACTACAAAGTAGTGAACCCGACAGGC 1035
Gallus_gallus  : ATACTACTATTTGGGCGTGGCGGGGAGGAGGAAACGGCCAAAGCTCAATTCGCGGAAATGGCAACCCGGANCGCTGGGAGGACCAAACTACAAAGTAGTGAACCCGACAGGC 1032
Ciconia_ciconia : ATACTACTATTTGGGCGTGGCGGGGAGGAGGAAACGGCCAAAGCTCAATTCGCGGAAATGGCAACCCGGANCGCTGGGAGGACCAAACTACAAAGTAGTGAACCCGACAGGC 1035
Ciconia_boyciana : ATACTACTATTTGGGCGTGGCGGGGAGGAGGAAACGGCCAAAGCTCAATTCGCGGAAATGGCAACCCGGANCGCTGGGAGGACCAAACTACAAAGTAGTGAACCCGACAGGC 1035
Iguana_iguana  : ATACTACTATTTGGGCGTGGCGGGGAGGAGGAAACGGCCAAAGCTCAATTCGCGGAAATGGCAACCCGGANCGCTGGGAGGACCAAACTACAAAGTAGTGAACCCGACAGGC 1032
Fumeces_egregius : GATATTTATTTGGGCGATGGCGGGTAGGGGCGGGCCAAAGCTCAATTCGCGGAAATGGCAACCCGGANCGCTGGGAGGACCAAACTACAAAGTAGTGAACCCGACAGGC 1032
Sphenodon_punctatus : ATACTACTATTTGGGCGTGGCGGGGAGGAGGAAACGGCCAAAGCTCAATTCGCGGAAATGGCAACCCGGANCGCTGGGAGGACCAAACTACAAAGTAGTGAACCCGACAGGC 1029
Sceloporus_occidentalis : ATACTACTATTTGGGCGTGGCGGGGAGGAGGAAACGGCCAAAGCTCAATTCGCGGAAATGGCAACCCGGANCGCTGGGAGGACCAAACTACAAAGTAGTGAACCCGACAGGC 1032
Cordylus_warreni : ATACTACTATTTGGGCGTGGCGGGGAGGAGGAAACGGCCAAAGCTCAATTCGCGGAAATGGCAACCCGGANCGCTGGGAGGACCAAACTACAAAGTAGTGAACCCGACAGGC 1029
Abronia_graminea : ATACTACTATTTGGGCGTGGCGGGGAGGAGGAAACGGCCAAAGCTCAATTCGCGGAAATGGCAACCCGGANCGCTGGGAGGACCAAACTACAAAGTAGTGAACCCGACAGGC 1032
Shinisaurus_crocodilurus : ATACTACTATTTGGGCGTGGCGGGGAGGAGGAAACGGCCAAAGCTCAATTCGCGGAAATGGCAACCCGGANCGCTGGGAGGACCAAACTACAAAGTAGTGAACCCGACAGGC 1029
Varanus_komodoensis : ATACTACTATTTGGGCGTGGCGGGGAGGAGGAAACGGCCAAAGCTCAATTCGCGGAAATGGCAACCCGGANCGCTGGGAGGACCAAACTACAAAGTAGTGAACCCGACAGGC 1029
Rhineura_floridana : ATACTACTATTTGGGCGTGGCGGGGAGGAGGAAACGGCCAAAGCTCAATTCGCGGAAATGGCAACCCGGANCGCTGGGAGGACCAAACTACAAAGTAGTGAACCCGACAGGC 1029
Geocalamus_acutus : ATACTACTATTTGGGCGTGGCGGGGAGGAGGAAACGGCCAAAGCTCAATTCGCGGAAATGGCAACCCGGANCGCTGGGAGGACCAAACTACAAAGTAGTGAACCCGACAGGC 1023
Diplometopon_zarudnyi : ATACTACTATTTGGGCGTGGCGGGGAGGAGGAAACGGCCAAAGCTCAATTCGCGGAAATGGCAACCCGGANCGCTGGGAGGACCAAACTACAAAGTAGTGAACCCGACAGGC 1023
Amphisbaena_schmidti : ATACTACTATTTGGGCGTGGCGGGGAGGAGGAAACGGCCAAAGCTCAATTCGCGGAAATGGCAACCCGGANCGCTGGGAGGACCAAACTACAAAGTAGTGAACCCGACAGGC 1029
Bipes_tridactylus : ATACTACTATTTGGGCGTGGCGGGGAGGAGGAAACGGCCAAAGCTCAATTCGCGGAAATGGCAACCCGGANCGCTGGGAGGACCAAACTACAAAGTAGTGAACCCGACAGGC 1023
Bipes_capaliculatus : GATATTTATTTGGGCGATGGCGGGTAGGGGCGGGCCAAAGCTCAATTCGCGGAAATGGCAACCCGGANCGCTGGGAGGACCAAACTACAAAGTAGTGAACCCGACAGGC 1023
Bipes_biporus  : GATATTTATTTGGGCGATGGCGGGTAGGGGCGGGCCAAAGCTCAATTCGCGGAAATGGCAACCCGGANCGCTGGGAGGACCAAACTACAAAGTAGTGAACCCGACAGGC 1023
Anolis_carolinensis : ATACTACTATTTGGGCGTGGCGGGGAGGAGGAAACGGCCAAAGCTCAATTCGCGGAAATGGCAACCCGGANCGCTGGGAGGACCAAACTACAAAGTAGTGAACCCGACAGGC 1031
Ophisaurus_atnuatus : ATACTACTATTTGGGCGTGGCGGGGAGGAGGAAACGGCCAAAGCTCAATTCGCGGAAATGGCAACCCGGANCGCTGGGAGGACCAAACTACAAAGTAGTGAACCCGACAGGC 1032
Varanus_salvator : ATACTACTATTTGGGCGTGGCGGGGAGGAGGAAACGGCCAAAGCTCAATTCGCGGAAATGGCAACCCGGANCGCTGGGAGGACCAAACTACAAAGTAGTGAACCCGACAGGC 1029
Mertensiella_luschani : ATACTACTATTTGGGCGTGGCGGGGAGGAGGAAACGGCCAAAGCTCAATTCGCGGAAATGGCAACCCGGANCGCTGGGAGGACCAAACTACAAAGTAGTGAACCCGACAGGC 1032
Xenopus_laevis : ATACTACTATTTGGGCGTGGCGGGGAGGAGGAAACGGCCAAAGCTCAATTCGCGGAAATGGCAACCCGGANCGCTGGGAGGACCAAACTACAAAGTAGTGAACCCGACAGGC 1029

```



|                            | 1340 | * | 1360 | * | 1380 | * | 1400 | * | 1420 | * | 1440 | * | 1460 |        |
|----------------------------|------|---|------|---|------|---|------|---|------|---|------|---|------|--------|
| Bos_taurus                 | : C  | T | C    | A | T    | T | C    | A | T    | T | C    | A | T    | : 1328 |
| Hylobates_lar              | : C  | T | C    | A | T    | T | C    | A | T    | T | C    | A | T    | : 1334 |
| Lemur_catta                | : C  | T | C    | A | T    | T | C    | A | T    | T | C    | A | T    | : 1334 |
| Nycticebus_coucang         | : C  | T | C    | A | T    | T | C    | A | T    | T | C    | A | T    | : 1331 |
| Tarsius_bancanus           | : C  | T | C    | A | T    | T | C    | A | T    | T | C    | A | T    | : 1331 |
| Gorilla_gorilla            | : C  | T | C    | A | T    | T | C    | A | T    | T | C    | A | T    | : 1334 |
| Homo_sapiens               | : C  | T | C    | A | T    | T | C    | A | T    | T | C    | A | T    | : 1334 |
| Papio_hamadryas            | : C  | T | C    | A | T    | T | C    | A | T    | T | C    | A | T    | : 1334 |
| Cebus_albifrons            | : C  | T | C    | A | T    | T | C    | A | T    | T | C    | A | T    | : 1328 |
| Macaca_sylvanus            | : C  | T | C    | A | T    | T | C    | A | T    | T | C    | A | T    | : 1328 |
| Pongo_pygmaeus             | : C  | T | C    | A | T    | T | C    | A | T    | T | C    | A | T    | : 1334 |
| Pan_paniscus               | : C  | T | C    | A | T    | T | C    | A | T    | T | C    | A | T    | : 1334 |
| Agkistrodon_piscivorus     | : C  | A | G    | C | T    | A | C    | T | A    | C | T    | A | C    | : 1292 |
| Pantherophis_guttatus      | : C  | A | G    | C | T    | A | C    | T | A    | C | T    | A | C    | : 1286 |
| Dinodon_semicarinatus      | : C  | A | G    | C | T    | A | C    | T | A    | C | T    | A | C    | : 1286 |
| Boa_constrictor            | : C  | A | G    | C | T    | A | C    | T | A    | C | T    | A | C    | : 1295 |
| Python_regius              | : C  | A | G    | C | T    | A | C    | T | A    | C | T    | A | C    | : 1295 |
| Acrochordus_granulatus     | : C  | A | G    | C | T    | A | C    | T | A    | C | T    | A | C    | : 1295 |
| Cylindrophis_ruffus        | : C  | A | G    | C | T    | A | C    | T | A    | C | T    | A | C    | : 1295 |
| Ovophis_okinavensis        | : C  | A | G    | C | T    | A | C    | T | A    | C | T    | A | C    | : 1292 |
| Xenopeltis_unicolor        | : C  | A | G    | C | T    | A | C    | T | A    | C | T    | A | C    | : 1298 |
| Typhlops_reticulatus       | : C  | A | G    | C | T    | A | C    | T | A    | C | T    | A | C    | : 1289 |
| Leptotyphlops_dulcis       | : C  | A | G    | C | T    | A | C    | T | A    | C | T    | A | C    | : 1289 |
| Caiman_crocodilus          | : C  | A | G    | C | T    | A | C    | T | A    | C | T    | A | C    | : 1301 |
| Alligator_sinensis         | : C  | A | G    | C | T    | A | C    | T | A    | C | T    | A | C    | : 1313 |
| Alligator_mississippiensis | : C  | A | G    | C | T    | A | C    | T | A    | C | T    | A | C    | : 1286 |
| Gavialis_gangeticus        | : C  | A | G    | C | T    | A | C    | T | A    | C | T    | A | C    | : 1301 |
| Crocodylus_moreletii       | : C  | A | G    | C | T    | A | C    | T | A    | C | T    | A | C    | : 1301 |
| Dogania_subplana           | : C  | A | G    | C | T    | A | C    | T | A    | C | T    | A | C    | : 1295 |
| Pelomedusa_subrufa         | : C  | A | G    | C | T    | A | C    | T | A    | C | T    | A | C    | : 1301 |
| Chrysemys_picta            | : C  | A | G    | C | T    | A | C    | T | A    | C | T    | A | C    | : 1319 |
| Chelonia_mydas             | : C  | A | G    | C | T    | A | C    | T | A    | C | T    | A | C    | : 1316 |
| Tinanus_major              | : C  | A | G    | C | T    | A | C    | T | A    | C | T    | A | C    | : 1301 |
| Smithornis_sharpei         | : C  | A | G    | C | T    | A | C    | T | A    | C | T    | A | C    | : 1301 |
| Corvus_fruyilegus          | : C  | A | G    | C | T    | A | C    | T | A    | C | T    | A | C    | : 1301 |
| Vidua_chalybeata           | : C  | A | G    | C | T    | A | C    | T | A    | C | T    | A | C    | : 1301 |
| Buteo_buteo                | : C  | A | G    | C | T    | A | C    | T | A    | C | T    | A | C    | : 1301 |
| Falco_peregrinus           | : C  | A | G    | C | T    | A | C    | T | A    | C | T    | A | C    | : 1301 |
| Dromaius_novaeollandiae    | : C  | A | G    | C | T    | A | C    | T | A    | C | T    | A | C    | : 1301 |
| Struthio_camelus           | : C  | A | G    | C | T    | A | C    | T | A    | C | T    | A | C    | : 1301 |
| Apteryx_haastii            | : C  | A | G    | C | T    | A | C    | T | A    | C | T    | A | C    | : 1301 |
| Rhea_americanana           | : C  | A | G    | C | T    | A | C    | T | A    | C | T    | A | C    | : 1301 |
| Gallus_gallus              | : C  | A | G    | C | T    | A | C    | T | A    | C | T    | A | C    | : 1295 |
| Ciconia_ciconia            | : C  | A | G    | C | T    | A | C    | T | A    | C | T    | A | C    | : 1301 |
| Ciconia_boycciana          | : C  | A | G    | C | T    | A | C    | T | A    | C | T    | A | C    | : 1301 |
| Iguana_iguana              | : C  | A | G    | C | T    | A | C    | T | A    | C | T    | A | C    | : 1298 |
| Eumeces_egregius           | : C  | A | G    | C | T    | A | C    | T | A    | C | T    | A | C    | : 1298 |
| Sphenodon_punctatus        | : C  | A | G    | C | T    | A | C    | T | A    | C | T    | A | C    | : 1295 |
| Sceloporus_occidentalis    | : C  | A | G    | C | T    | A | C    | T | A    | C | T    | A | C    | : 1298 |
| Cordylus_warreni           | : C  | A | G    | C | T    | A | C    | T | A    | C | T    | A | C    | : 1295 |
| Abronia_graminea           | : C  | A | G    | C | T    | A | C    | T | A    | C | T    | A | C    | : 1298 |
| Shinisaurus_crocodilurus   | : C  | A | G    | C | T    | A | C    | T | A    | C | T    | A | C    | : 1295 |
| Varanus_komodoensis        | : C  | A | G    | C | T    | A | C    | T | A    | C | T    | A | C    | : 1295 |
| Rhineura_floridana         | : C  | A | G    | C | T    | A | C    | T | A    | C | T    | A | C    | : 1295 |
| Geocalamus_acutus          | : C  | A | G    | C | T    | A | C    | T | A    | C | T    | A | C    | : 1289 |
| Diplometopon_zarudnyi      | : C  | A | G    | C | T    | A | C    | T | A    | C | T    | A | C    | : 1289 |
| Amphisbaena_schmidti       | : C  | A | G    | C | T    | A | C    | T | A    | C | T    | A | C    | : 1295 |
| Bipes_tridactylus          | : C  | A | G    | C | T    | A | C    | T | A    | C | T    | A | C    | : 1289 |
| Bipes_canaliculatus        | : C  | A | G    | C | T    | A | C    | T | A    | C | T    | A | C    | : 1289 |
| Bipes_biporus              | : C  | A | G    | C | T    | A | C    | T | A    | C | T    | A | C    | : 1289 |
| Anolis_carolinensis        | : C  | A | G    | C | T    | A | C    | T | A    | C | T    | A | C    | : 1297 |
| Ophisaurus_atnuatus        | : C  | A | G    | C | T    | A | C    | T | A    | C | T    | A | C    | : 1298 |
| Varanus_salvator           | : C  | A | G    | C | T    | A | C    | T | A    | C | T    | A | C    | : 1295 |
| Mertensiella_luschani      | : C  | A | G    | C | T    | A | C    | T | A    | C | T    | A | C    | : 1298 |
| Xenopus_laevis             | : C  | A | G    | C | T    | A | C    | T | A    | C | T    | A | C    | : 1295 |

|                            | * | 1480       | *    | 1500 | *       | 1520 | *    | 1540    | *    | 1560 | *    | 1580 | *   |      |
|----------------------------|---|------------|------|------|---------|------|------|---------|------|------|------|------|-----|------|
| Bos_taurus                 | : | CTTAGCGGGG | ATCC | CAAT | CTAGGGG | CAAC | CAAC | TTAATTA | CAAC | CAAT | CAAA | CCCG | CCG | 1461 |
| Hylobates_lar              | : | CCGGCGGG   | GAAT | ATCT | CTAGGGG | TAAT | TAAC | TTAATTA | CAAC | CAAT | CAAA | CCCG | CCG | 1467 |
| Lemur_catta                | : | CTTAGCGGGG | ATCC | CAAT | CTAGGGG | CAAC | CAAC | TTAATTA | CAAC | CAAT | CAAA | CCCG | CCG | 1467 |
| Nycticebus_coucang         | : | CTTAGCGGGG | ATCC | CAAT | CTAGGGG | CAAC | CAAC | TTAATTA | CAAC | CAAT | CAAA | CCCG | CCG | 1464 |
| Tarsius_bancanus           | : | CTTAGCGGGG | ATCC | CAAT | CTAGGGG | CAAC | CAAC | TTAATTA | CAAC | CAAT | CAAA | CCCG | CCG | 1464 |
| Gorilla_gorilla            | : | CTTAGCGGGG | ATCC | CAAT | CTAGGGG | CAAC | CAAC | TTAATTA | CAAC | CAAT | CAAA | CCCG | CCG | 1467 |
| Homo_sapiens               | : | CTTAGCGGGG | ATCC | CAAT | CTAGGGG | CAAC | CAAC | TTAATTA | CAAC | CAAT | CAAA | CCCG | CCG | 1467 |
| Papio_hamadryas            | : | CTTAGCGGGG | ATCC | CAAT | CTAGGGG | CAAC | CAAC | TTAATTA | CAAC | CAAT | CAAA | CCCG | CCG | 1467 |
| Cebus_albifrons            | : | CTTAGCGGGG | ATCC | CAAT | CTAGGGG | CAAC | CAAC | TTAATTA | CAAC | CAAT | CAAA | CCCG | CCG | 1461 |
| Macaca_sylvanus            | : | CTTAGCGGGG | ATCC | CAAT | CTAGGGG | CAAC | CAAC | TTAATTA | CAAC | CAAT | CAAA | CCCG | CCG | 1461 |
| Pongo_pygmaeus             | : | CTTAGCGGGG | ATCC | CAAT | CTAGGGG | CAAC | CAAC | TTAATTA | CAAC | CAAT | CAAA | CCCG | CCG | 1467 |
| Pan_paniscus               | : | CTTAGCGGGG | ATCC | CAAT | CTAGGGG | CAAC | CAAC | TTAATTA | CAAC | CAAT | CAAA | CCCG | CCG | 1467 |
| Agkistrodon_piscivorus     | : | CTTAGCGGGG | ATCC | CAAT | CTAGGGG | CAAC | CAAC | TTAATTA | CAAC | CAAT | CAAA | CCCG | CCG | 1425 |
| Pantherophis_guttatus      | : | CTTAGCGGGG | ATCC | CAAT | CTAGGGG | CAAC | CAAC | TTAATTA | CAAC | CAAT | CAAA | CCCG | CCG | 1419 |
| Dinodon_semicarinatus      | : | CTTAGCGGGG | ATCC | CAAT | CTAGGGG | CAAC | CAAC | TTAATTA | CAAC | CAAT | CAAA | CCCG | CCG | 1419 |
| Boa_constrictor            | : | CTTAGCGGGG | ATCC | CAAT | CTAGGGG | CAAC | CAAC | TTAATTA | CAAC | CAAT | CAAA | CCCG | CCG | 1428 |
| Python_regius              | : | CTTAGCGGGG | ATCC | CAAT | CTAGGGG | CAAC | CAAC | TTAATTA | CAAC | CAAT | CAAA | CCCG | CCG | 1428 |
| Acrochordus_granulatus     | : | CTTAGCGGGG | ATCC | CAAT | CTAGGGG | CAAC | CAAC | TTAATTA | CAAC | CAAT | CAAA | CCCG | CCG | 1428 |
| Cylindrophis_ruffus        | : | CTTAGCGGGG | ATCC | CAAT | CTAGGGG | CAAC | CAAC | TTAATTA | CAAC | CAAT | CAAA | CCCG | CCG | 1428 |
| Ovophis_okinavensis        | : | CTTAGCGGGG | ATCC | CAAT | CTAGGGG | CAAC | CAAC | TTAATTA | CAAC | CAAT | CAAA | CCCG | CCG | 1425 |
| Xenopeltis_unicolor        | : | CTTAGCGGGG | ATCC | CAAT | CTAGGGG | CAAC | CAAC | TTAATTA | CAAC | CAAT | CAAA | CCCG | CCG | 1431 |
| Typhlops_reticulatus       | : | CTTAGCGGGG | ATCC | CAAT | CTAGGGG | CAAC | CAAC | TTAATTA | CAAC | CAAT | CAAA | CCCG | CCG | 1422 |
| Leptotyphlops_dulcis       | : | CTTAGCGGGG | ATCC | CAAT | CTAGGGG | CAAC | CAAC | TTAATTA | CAAC | CAAT | CAAA | CCCG | CCG | 1422 |
| Caiman_crocodilus          | : | CTTAGCGGGG | ATCC | CAAT | CTAGGGG | CAAC | CAAC | TTAATTA | CAAC | CAAT | CAAA | CCCG | CCG | 1434 |
| Alligator_sinensis         | : | CTTAGCGGGG | ATCC | CAAT | CTAGGGG | CAAC | CAAC | TTAATTA | CAAC | CAAT | CAAA | CCCG | CCG | 1446 |
| Alligator_mississippiensis | : | CTTAGCGGGG | ATCC | CAAT | CTAGGGG | CAAC | CAAC | TTAATTA | CAAC | CAAT | CAAA | CCCG | CCG | 1419 |
| Gavialis_gangeticus        | : | CTTAGCGGGG | ATCC | CAAT | CTAGGGG | CAAC | CAAC | TTAATTA | CAAC | CAAT | CAAA | CCCG | CCG | 1434 |
| Crocodylus_moreletii       | : | CTTAGCGGGG | ATCC | CAAT | CTAGGGG | CAAC | CAAC | TTAATTA | CAAC | CAAT | CAAA | CCCG | CCG | 1434 |
| Dogania_subplana           | : | CTTAGCGGGG | ATCC | CAAT | CTAGGGG | CAAC | CAAC | TTAATTA | CAAC | CAAT | CAAA | CCCG | CCG | 1428 |
| Pelomedusa_subrufa         | : | CTTAGCGGGG | ATCC | CAAT | CTAGGGG | CAAC | CAAC | TTAATTA | CAAC | CAAT | CAAA | CCCG | CCG | 1434 |
| Chrysemys_picta            | : | CTTAGCGGGG | ATCC | CAAT | CTAGGGG | CAAC | CAAC | TTAATTA | CAAC | CAAT | CAAA | CCCG | CCG | 1452 |
| Chelonia_mydas             | : | CTTAGCGGGG | ATCC | CAAT | CTAGGGG | CAAC | CAAC | TTAATTA | CAAC | CAAT | CAAA | CCCG | CCG | 1449 |
| Tinamus_major              | : | CTTAGCGGGG | ATCC | CAAT | CTAGGGG | CAAC | CAAC | TTAATTA | CAAC | CAAT | CAAA | CCCG | CCG | 1434 |
| Smithornis_sharpei         | : | CTTAGCGGGG | ATCC | CAAT | CTAGGGG | CAAC | CAAC | TTAATTA | CAAC | CAAT | CAAA | CCCG | CCG | 1434 |
| Corvus_frugilegus          | : | CTTAGCGGGG | ATCC | CAAT | CTAGGGG | CAAC | CAAC | TTAATTA | CAAC | CAAT | CAAA | CCCG | CCG | 1434 |
| Vidua_chalybeata           | : | CTTAGCGGGG | ATCC | CAAT | CTAGGGG | CAAC | CAAC | TTAATTA | CAAC | CAAT | CAAA | CCCG | CCG | 1434 |
| Buteo_buteo                | : | CTTAGCGGGG | ATCC | CAAT | CTAGGGG | CAAC | CAAC | TTAATTA | CAAC | CAAT | CAAA | CCCG | CCG | 1434 |
| Falco_peregrinus           | : | CTTAGCGGGG | ATCC | CAAT | CTAGGGG | CAAC | CAAC | TTAATTA | CAAC | CAAT | CAAA | CCCG | CCG | 1434 |
| Dromaius_novaeollandiae    | : | CTTAGCGGGG | ATCC | CAAT | CTAGGGG | CAAC | CAAC | TTAATTA | CAAC | CAAT | CAAA | CCCG | CCG | 1434 |
| Struthio_camelus           | : | CTTAGCGGGG | ATCC | CAAT | CTAGGGG | CAAC | CAAC | TTAATTA | CAAC | CAAT | CAAA | CCCG | CCG | 1434 |
| Apteryx_haastii            | : | CTTAGCGGGG | ATCC | CAAT | CTAGGGG | CAAC | CAAC | TTAATTA | CAAC | CAAT | CAAA | CCCG | CCG | 1434 |
| Rhea_americanana           | : | CTTAGCGGGG | ATCC | CAAT | CTAGGGG | CAAC | CAAC | TTAATTA | CAAC | CAAT | CAAA | CCCG | CCG | 1434 |
| Gallus_gallus              | : | CTTAGCGGGG | ATCC | CAAT | CTAGGGG | CAAC | CAAC | TTAATTA | CAAC | CAAT | CAAA | CCCG | CCG | 1428 |
| Ciconia_ciconia            | : | CTTAGCGGGG | ATCC | CAAT | CTAGGGG | CAAC | CAAC | TTAATTA | CAAC | CAAT | CAAA | CCCG | CCG | 1434 |
| Ciconia_boyciana           | : | CTTAGCGGGG | ATCC | CAAT | CTAGGGG | CAAC | CAAC | TTAATTA | CAAC | CAAT | CAAA | CCCG | CCG | 1434 |
| Iguana_iguana              | : | CTTAGCGGGG | ATCC | CAAT | CTAGGGG | CAAC | CAAC | TTAATTA | CAAC | CAAT | CAAA | CCCG | CCG | 1431 |
| Eumeces_egregius           | : | CTTAGCGGGG | ATCC | CAAT | CTAGGGG | CAAC | CAAC | TTAATTA | CAAC | CAAT | CAAA | CCCG | CCG | 1431 |
| Sphenodon_punctatus        | : | CTTAGCGGGG | ATCC | CAAT | CTAGGGG | CAAC | CAAC | TTAATTA | CAAC | CAAT | CAAA | CCCG | CCG | 1428 |
| Sceloporus_occidentalis    | : | CTTAGCGGGG | ATCC | CAAT | CTAGGGG | CAAC | CAAC | TTAATTA | CAAC | CAAT | CAAA | CCCG | CCG | 1431 |
| Cordylus_warreni           | : | CTTAGCGGGG | ATCC | CAAT | CTAGGGG | CAAC | CAAC | TTAATTA | CAAC | CAAT | CAAA | CCCG | CCG | 1428 |
| Abronia_graminea           | : | CTTAGCGGGG | ATCC | CAAT | CTAGGGG | CAAC | CAAC | TTAATTA | CAAC | CAAT | CAAA | CCCG | CCG | 1431 |
| Shinisaurus_crocodilurus   | : | CTTAGCGGGG | ATCC | CAAT | CTAGGGG | CAAC | CAAC | TTAATTA | CAAC | CAAT | CAAA | CCCG | CCG | 1428 |
| Varanus_komodoensis        | : | CTTAGCGGGG | ATCC | CAAT | CTAGGGG | CAAC | CAAC | TTAATTA | CAAC | CAAT | CAAA | CCCG | CCG | 1428 |
| Rhineura_floridana         | : | CTTAGCGGGG | ATCC | CAAT | CTAGGGG | CAAC | CAAC | TTAATTA | CAAC | CAAT | CAAA | CCCG | CCG | 1428 |
| Geocalamus_acutus          | : | CTTAGCGGGG | ATCC | CAAT | CTAGGGG | CAAC | CAAC | TTAATTA | CAAC | CAAT | CAAA | CCCG | CCG | 1422 |
| Diplometopon_zarudnyi      | : | CTTAGCGGGG | ATCC | CAAT | CTAGGGG | CAAC | CAAC | TTAATTA | CAAC | CAAT | CAAA | CCCG | CCG | 1422 |
| Amphisbaena_schmidti       | : | CTTAGCGGGG | ATCC | CAAT | CTAGGGG | CAAC | CAAC | TTAATTA | CAAC | CAAT | CAAA | CCCG | CCG | 1428 |
| Bipes_tridactylus          | : | CTTAGCGGGG | ATCC | CAAT | CTAGGGG | CAAC | CAAC | TTAATTA | CAAC | CAAT | CAAA | CCCG | CCG | 1422 |
| Bipes_capaliculatus        | : | CTTAGCGGGG | ATCC | CAAT | CTAGGGG | CAAC | CAAC | TTAATTA | CAAC | CAAT | CAAA | CCCG | CCG | 1422 |
| Bipes_biporus              | : | CTTAGCGGGG | ATCC | CAAT | CTAGGGG | CAAC | CAAC | TTAATTA | CAAC | CAAT | CAAA | CCCG | CCG | 1422 |
| Anolis_carolinensis        | : | CTTAGCGGGG | ATCC | CAAT | CTAGGGG | CAAC | CAAC | TTAATTA | CAAC | CAAT | CAAA | CCCG | CCG | 1430 |
| Ophisaurus_atnuatus        | : | CTTAGCGGGG | ATCC | CAAT | CTAGGGG | CAAC | CAAC | TTAATTA | CAAC | CAAT | CAAA | CCCG | CCG | 1431 |
| Varanus_salvator           | : | CTTAGCGGGG | ATCC | CAAT | CTAGGGG | CAAC | CAAC | TTAATTA | CAAC | CAAT | CAAA | CCCG | CCG | 1428 |
| Mertensiella_luschani      | : | CTTAGCGGGG | ATCC | CAAT | CTAGGGG | CAAC | CAAC | TTAATTA | CAAC | CAAT | CAAA | CCCG | CCG | 1431 |
| Xenopus_laevis             | : | CTTAGCGGGG | ATCC | CAAT | CTAGGGG | CAAC | CAAC | TTAATTA | CAAC | CAAT | CAAA | CCCG | CCG | 1428 |

1600 \* 1620 \* 1640 \* 1660 \* 1680 \* 1700 \* 1720

Bos\_taurus : **A**CTCTGGTCCCG**G**ATAGAGCGGGATGACAAAGGTAATAACNGCCGGAACCAAAATAAGCCCTTCCTGACCCGGAGGAGGGGCA**C**CCATATATAAAC**C**CTATAGTCTTAGGA : 1594  
Hylobates\_lar : **C**TCCCTCCCTA**C**CG**G**CTAGCGCGGGATTAATATACTAAAGGACCGAAACCTAAACAATCTTCTTGACCCCGGGGGGGGGA**C**CCATATATAAAC**C**CTATAGTCTTAGGA : 1600  
Lemur\_catta : **C**TCTCATCTTACCGGTTTAGAGAGAGGATTAATAACTAAAGTCCGAACTTAAACAACCTTTTTCGACCCGGAGGAGGGGCA**C**CCATATATAAAC**C**CTATAGTCTTAGGA : 1600  
Nycticebus\_coucang : **N**CTATCTTCCCGG**G**CTGTCCTGGAGCGGATACAAATGCTGTAAAGCCGAAACCTAAACAACCTTTTTCGACCCGGAGGAGGGGCA**C**CCATATATAAAC**C**CTATAGTCTTAGGA : 1597  
Tarsius\_bancanus : **T**ACTATCCCTCCCG**G**CTAGAGAGGGATTAATAACTAAAGGACCGAAACCTTAAACAACCTTTTTCGACCCGGAGGAGGGGCA**C**CCATATATAAAC**C**CTATAGTCTTAGGA : 1597  
Gorilla\_gorilla : **G**TCTATCTTCCCG**G**CTAGAGCGGGATTAATAACTAAAGGACCGAAACCTTAAACAACCTTTTTCGACCCGGAGGAGGGGCA**C**CCATATATAAAC**C**CTATAGTCTTAGGA : 1600  
Homo\_sapiens : **H**TCCATCTTCCCG**G**CTAGAGCGGGATTAATAACTAAAGGACCGAAACCTTAAACAACCTTTTTCGACCCCGGGAGGGGCA**C**CCATATATAAAC**C**CTATAGTCTTAGGA : 1600  
Papio\_hamadryas : **P**TCTCTCCCT**A**CCG**G**CTAGCGCGGGATTAATAACTAAAGGACCGAACTTAAACAACCTTTTTCGACCCGGAGGAGGGGCA**C**CCATATATAAAC**C**CTATAGTCTTAGGA : 1600  
Cebus\_albifrons : **C**TCTCTCCCTCCCG**G**CTAGAGCGGGATTAATAACTAAAGGACCGAAACCTTAAACAACCTTTTTCGACCCGGAGGAGGGGCA**C**CCATATATAAAC**C**CTATAGTCTTAGGA : 1594  
Macaca\_sylvanus : **M**TCTCTCCCT**A**CCG**G**CTAGCGCGGGATTAATAACTAAAGGACCGAAACCTTAAACAACCTTTTTCGACCCGGAGGAGGGGCA**C**CCATATATAAAC**C**CTATAGTCTTAGGA : 1594  
Pongo\_pygmaeus : **P**TCTCTCCCTCCCG**G**CTAGAGCGGGATTAATAACTAAAGGACCGAAACCTTAAACAACCTTTTTCGACCCGGAGGAGGGGCA**C**CCATATATAAAC**C**CTATAGTCTTAGGA : 1600  
Pan\_paniscus : **P**TCTCTCCCTCCCG**G**CTAGAGCGGGATTAATAACTAAAGGACCGAAACCTTAAACAACCTTTTTCGACCCGGAGGAGGGGCA**C**CCATATATAAAC**C**CTATAGTCTTAGGA : 1600  
Agkistrodon\_piscivorus : **A**CTCTAGAG**A**CTCCCG**G**CTAGAGCGGGATTAATAACTAAAGGACCGAAACCTTAAACAACCTTTTTCGACCCGGAGGAGGGGCA**C**CCATATATAAAC**C**CTATAGTCTTAGGA : 1558  
Pantherophis\_guttatus : **P**ATTGGCCCTA**C**CCG**G**ATTAGAGAGGATTAATAACTAAAGTATGATGAAACTTAAACAACCTTTTTCGACCCGGAGGAGGGGCA**C**CCATATATAAAC**C**CTATAGTCTTAGGA : 1552  
Dinodon\_semicarinatus : **D**TCTTAGCCCT**A**CCG**G**ATTAGAGCGGGATTAATAACTAAAGGACCGAAACCTTAAACAACCTTTTTCGACCCGGAGGAGGGGCA**C**CCATATATAAAC**C**CTATAGTCTTAGGA : 1552  
Boa\_constrictor : **B**CTTAGAG**A**CTCCCG**G**CTAGAGCGGGATTAATAACTAAAGGACCGAAACCTTAAACAACCTTTTTCGACCCGGAGGAGGGGCA**C**CCATATATAAAC**C**CTATAGTCTTAGGA : 1561  
Python\_regius : **P**TCTTAGCCCT**A**CCG**G**ATTAGAGAGGATTAATAACTAAAGGACCGAAACCTTAAACAACCTTTTTCGACCCGGAGGAGGGGCA**C**CCATATATAAAC**C**CTATAGTCTTAGGA : 1561  
Acrochordus\_granulatus : **A**TCTTAGAG**A**CTCCCG**G**ATTAGAGCGGGATTAATAACTAAAGGACCGAAACCTTAAACAACCTTTTTCGACCCGGAGGAGGGGCA**C**CCATATATAAAC**C**CTATAGTCTTAGGA : 1561  
Cylindrophis\_ruffus : **C**TACTGGCCCT**A**CCG**G**ATTAGAGGAGGATTAATAACTAAAGGACCGAAACCTTAAACAACCTTTTTCGACCCGGAGGAGGGGCA**C**CCATATATAAAC**C**CTATAGTCTTAGGA : 1561  
Ovophis\_okinavensis : **O**TCTTAGAG**A**CTCCCG**G**ATTAGAGCGGGATTAATAACTAAAGGACCGAAACCTTAAACAACCTTTTTCGACCCGGAGGAGGGGCA**C**CCATATATAAAC**C**CTATAGTCTTAGGA : 1558  
Xenopeltis\_unicolor : **X**ATTAGAG**A**CTCCCG**G**ATTAGAGCGGGATTAATAACTAAAGGACCGAAACCTTAAACAACCTTTTTCGACCCGGAGGAGGGGCA**C**CCATATATAAAC**C**CTATAGTCTTAGGA : 1564  
Typhlops\_reticulatus : **T**TAATCCCT**A**CCG**G**ATTAGAGAGGATTAATAACTAAAGGACCGAAACCTTAAACAACCTTTTTCGACCCGGAGGAGGGGCA**C**CCATATATAAAC**C**CTATAGTCTTAGGA : 1555  
Leptotyphlops\_dulcis : **L**ATTAGAG**A**CTCCCG**G**ATTAGAGAGGATTAATAACTAAAGGACCGAAACCTTAAACAACCTTTTTCGACCCGGAGGAGGGGCA**C**CCATATATAAAC**C**CTATAGTCTTAGGA : 1555  
Caiman\_crocodilus : **C**TACTAGCCCT**A**CCG**G**ATTAGAGCGGGATTAATAACTAAAGGACCGAAACCTTAAACAACCTTTTTCGACCCGGAGGAGGGGCA**C**CCATATATAAAC**C**CTATAGTCTTAGGA : 1567  
Alligator\_sinensis : **A**TCTATCCCT**A**CCG**G**ATTAGAGCGGGATTAATAACTAAAGGACCGAAACCTTAAACAACCTTTTTCGACCCGGAGGAGGGGCA**C**CCATATATAAAC**C**CTATAGTCTTAGGA : 1579  
Alligator\_mississippiensis : **A**TCTATCCCT**A**CCG**G**ATTAGAGCGGGATTAATAACTAAAGGACCGAAACCTTAAACAACCTTTTTCGACCCGGAGGAGGGGCA**C**CCATATATAAAC**C**CTATAGTCTTAGGA : 1552  
Gavialis\_gangeticus : **G**TCTACTCCCT**A**CCG**G**ATTAGAGCGGGATTAATAACTAAAGGACCGAAACCTTAAACAACCTTTTTCGACCCGGAGGAGGGGCA**C**CCATATATAAAC**C**CTATAGTCTTAGGA : 1567  
Crocodylus\_moreletii : **C**TCTACTCCCT**A**CCG**G**ATTAGAGCGGGATTAATAACTAAAGGACCGAAACCTTAAACAACCTTTTTCGACCCGGAGGAGGGGCA**C**CCATATATAAAC**C**CTATAGTCTTAGGA : 1567  
Dogania\_subplana : **D**TCTACTCCCT**A**CCG**G**ATTAGAGCGGGATTAATAACTAAAGGACCGAAACCTTAAACAACCTTTTTCGACCCGGAGGAGGGGCA**C**CCATATATAAAC**C**CTATAGTCTTAGGA : 1561  
Pelomedusa\_subrufa : **P**CTATCCCT**A**CCG**G**CTAGAGCGGGATTAATAACTAAAGGACCGAAACCTTAAACAACCTTTTTCGACCCGGAGGAGGGGCA**C**CCATATATAAAC**C**CTATAGTCTTAGGA : 1567  
Chrysemys\_picta : **C**TCTACTCCCT**A**CCG**G**ATTAGAGCGGGATTAATAACTAAAGGACCGAAACCTTAAACAACCTTTTTCGACCCGGAGGAGGGGCA**C**CCATATATAAAC**C**CTATAGTCTTAGGA : 1585  
Chelonia\_mydas : **C**TCTACTCCCT**A**CCG**G**ATTAGAGCGGGATTAATAACTAAAGGACCGAAACCTTAAACAACCTTTTTCGACCCGGAGGAGGGGCA**C**CCATATATAAAC**C**CTATAGTCTTAGGA : 1582  
Tinanus\_major : **T**TACTACTCCCT**A**CCG**G**ATTAGAGCGGGATTAATAACTAAAGGACCGAAACCTTAAACAACCTTTTTCGACCCGGAGGAGGGGCA**C**CCATATATAAAC**C**CTATAGTCTTAGGA : 1567  
Smithornis\_sharpei : **S**TACTACTCCCT**A**CCG**G**ATTAGAGCGGGATTAATAACTAAAGGACCGAAACCTTAAACAACCTTTTTCGACCCGGAGGAGGGGCA**C**CCATATATAAAC**C**CTATAGTCTTAGGA : 1567  
Corvus\_frugilegus : **C**TCTACTCCCT**A**CCG**G**ATTAGAGCGGGATTAATAACTAAAGGACCGAAACCTTAAACAACCTTTTTCGACCCGGAGGAGGGGCA**C**CCATATATAAAC**C**CTATAGTCTTAGGA : 1567  
Vidua\_chalybeata : **V**ACTACTCCCT**A**CCG**G**ATTAGAGCGGGATTAATAACTAAAGGACCGAAACCTTAAACAACCTTTTTCGACCCGGAGGAGGGGCA**C**CCATATATAAAC**C**CTATAGTCTTAGGA : 1567  
Buteo\_buteo : **B**TACTACTCCCT**A**CCG**G**ATTAGAGCGGGATTAATAACTAAAGGACCGAAACCTTAAACAACCTTTTTCGACCCGGAGGAGGGGCA**C**CCATATATAAAC**C**CTATAGTCTTAGGA : 1567  
Falco\_peregrinus : **F**CTCTACTCCCT**A**CCG**G**ATTAGAGCGGGATTAATAACTAAAGGACCGAAACCTTAAACAACCTTTTTCGACCCGGAGGAGGGGCA**C**CCATATATAAAC**C**CTATAGTCTTAGGA : 1567  
Dromaius\_novaeollandiae : **D**TCTACTCCCT**A**CCG**G**ATTAGAGCGGGATTAATAACTAAAGGACCGAAACCTTAAACAACCTTTTTCGACCCGGAGGAGGGGCA**C**CCATATATAAAC**C**CTATAGTCTTAGGA : 1567  
Struthio\_camelus : **S**TACTACTCCCT**A**CCG**G**ATTAGAGCGGGATTAATAACTAAAGGACCGAAACCTTAAACAACCTTTTTCGACCCGGAGGAGGGGCA**C**CCATATATAAAC**C**CTATAGTCTTAGGA : 1567  
Apteryx\_haastii : **A**TCTACTCCCT**A**CCG**G**ATTAGAGCGGGATTAATAACTAAAGGACCGAAACCTTAAACAACCTTTTTCGACCCGGAGGAGGGGCA**C**CCATATATAAAC**C**CTATAGTCTTAGGA : 1567  
Rhea\_americanana : **R**TCTACTCCCT**A**CCG**G**ATTAGAGCGGGATTAATAACTAAAGGACCGAAACCTTAAACAACCTTTTTCGACCCGGAGGAGGGGCA**C**CCATATATAAAC**C**CTATAGTCTTAGGA : 1567  
Gallus\_gallus : **G**TCTACTCCCT**A**CCG**G**ATTAGAGCGGGATTAATAACTAAAGGACCGAAACCTTAAACAACCTTTTTCGACCCGGAGGAGGGGCA**C**CCATATATAAAC**C**CTATAGTCTTAGGA : 1561  
Ciconia\_ciconia : **C**TCTACTCCCT**A**CCG**G**ATTAGAGCGGGATTAATAACTAAAGGACCGAAACCTTAAACAACCTTTTTCGACCCGGAGGAGGGGCA**C**CCATATATAAAC**C**CTATAGTCTTAGGA : 1567  
Ciconia\_boyciiana : **C**TCTACTCCCT**A**CCG**G**ATTAGAGCGGGATTAATAACTAAAGGACCGAAACCTTAAACAACCTTTTTCGACCCGGAGGAGGGGCA**C**CCATATATAAAC**C**CTATAGTCTTAGGA : 1567  
Iguana\_iguana : **I**TCTACTCCCT**A**CCG**G**ATTAGAGCGGGATTAATAACTAAAGGACCGAAACCTTAAACAACCTTTTTCGACCCGGAGGAGGGGCA**C**CCATATATAAAC**C**CTATAGTCTTAGGA : 1564  
Fumeces\_egregius : **F**TCTACTCCCT**A**CCG**G**ATTAGAGCGGGATTAATAACTAAAGGACCGAAACCTTAAACAACCTTTTTCGACCCGGAGGAGGGGCA**C**CCATATATAAAC**C**CTATAGTCTTAGGA : 1564  
Sphenodon\_punctatus : **S**TCTACTCCCT**A**CCG**G**ATTAGAGCGGGATTAATAACTAAAGGACCGAAACCTTAAACAACCTTTTTCGACCCGGAGGAGGGGCA**C**CCATATATAAAC**C**CTATAGTCTTAGGA : 1561  
Sceloporus\_occidentalis : **S**TCTACTCCCT**A**CCG**G**ATTAGAGCGGGATTAATAACTAAAGGACCGAAACCTTAAACAACCTTTTTCGACCCGGAGGAGGGGCA**C**CCATATATAAAC**C**CTATAGTCTTAGGA : 1564  
Cordylus\_warreni : **C**TCTACTCCCT**A**CCG**G**ATTAGAGCGGGATTAATAACTAAAGGACCGAAACCTTAAACAACCTTTTTCGACCCGGAGGAGGGGCA**C**CCATATATAAAC**C**CTATAGTCTTAGGA : 1561  
Abronia\_graminea : **A**TCTACTCCCT**A**CCG**G**ATTAGAGCGGGATTAATAACTAAAGGACCGAAACCTTAAACAACCTTTTTCGACCCGGAGGAGGGGCA**C**CCATATATAAAC**C**CTATAGTCTTAGGA : 1564  
Shinisaurus\_crocodilurus : **S**TCTACTCCCT**A**CCG**G**ATTAGAGCGGGATTAATAACTAAAGGACCGAAACCTTAAACAACCTTTTTCGACCCGGAGGAGGGGCA**C**CCATATATAAAC**C**CTATAGTCTTAGGA : 1561  
Varanus\_komodoensis : **V**TCTACTCCCT**A**CCG**G**ATTAGAGCGGGATTAATAACTAAAGGACCGAAACCTTAAACAACCTTTTTCGACCCGGAGGAGGGGCA**C**CCATATATAAAC**C**CTATAGTCTTAGGA : 1561  
Rhineura\_floridana : **R**TCTACTCCCT**A**CCG**G**ATTAGAGCGGGATTAATAACTAAAGGACCGAAACCTTAAACAACCTTTTTCGACCCGGAGGAGGGGCA**C**CCATATATAAAC**C**CTATAGTCTTAGGA : 1561  
Geocalamus\_acutus : **G**TCTACTCCCT**A**CCG**G**ATTAGAGCGGGATTAATAACTAAAGGACCGAAACCTTAAACAACCTTTTTCGACCCGGAGGAGGGGCA**C**CCATATATAAAC**C**CTATAGTCTTAGGA : 1555  
Diplometopon\_zarudnyi : **D**TCTACTCCCT**A**CCG**G**ATTAGAGCGGGATTAATAACTAAAGGACCGAAACCTTAAACAACCTTTTTCGACCCGGAGGAGGGGCA**C**CCATATATAAAC**C**CTATAGTCTTAGGA : 1555  
Amphisbaena\_schmidti : **A**TCTACTCCCT**A**CCG**G**ATTAGAGCGGGATTAATAACTAAAGGACCGAAACCTTAAACAACCTTTTTCGACCCGGAGGAGGGGCA**C**CCATATATAAAC**C**CTATAGTCTTAGGA : 1561  
Bipes\_tridactylus : **B**TCTACTCCCT**A**CCG**G**ATTAGAGCGGGATTAATAACTAAAGGACCGAAACCTTAAACAACCTTTTTCGACCCGGAGGAGGGGCA**C**CCATATATAAAC**C**CTATAGTCTTAGGA : 1555  
Bipes\_canaliculatus : **B**TCTACTCCCT**A**CCG**G**ATTAGAGCGGGATTAATAACTAAAGGACCGAAACCTTAAACAACCTTTTTCGACCCGGAGGAGGGGCA**C**CCATATATAAAC**C**CTATAGTCTTAGGA : 1555  
Bipes\_biporus : **B**TCTACTCCCT**A**CCG**G**ATTAGAGCGGGATTAATAACTAAAGGACCGAAACCTTAAACAACCTTTTTCGACCCGGAGGAGGGGCA**C**CCATATATAAAC**C**CTATAGTCTTAGGA : 1555  
Anolis\_carolinensis : **A**TCTACTCCCT**A**CCG**G**ATTAGAGCGGGATTAATAACTAAAGGACCGAAACCTTAAACAACCTTTTTCGACCCGGAGGAGGGGCA**C**CCATATATAAAC**C**CTATAGTCTTAGGA : 1563  
Ophisaurus\_atnuatus : **O**TCTACTCCCT**A**CCG**G**ATTAGAGCGGGATTAATAACTAAAGGACCGAAACCTTAAACAACCTTTTTCGACCCGGAGGAGGGGCA**C**CCATATATAAAC**C**CTATAGTCTTAGGA : 1564  
Varanus\_salvator : **V**TCTACTCCCT**A**CCG**G**ATTAGAGCGGGATTAATAACTAAAGGACCGAAACCTTAAACAACCTTTTTCGACCCGGAGGAGGGGCA**C**CCATATATAAAC**C**CTATAGTCTTAGGA : 1561  
Mertensiella\_luschani : **M**TCTACTCCCT**A**CCG**G**ATTAGAGCGGGATTAATAACTAAAGGACCGAAACCTTAAACAACCTTTTTCGACCCGGAGGAGGGGCA**C**CCATATATAAAC**C**CTATAGTCTTAGGA : 1564  
Xenopus\_laevis : **X**TCTACTCCCT**A**CCG**G**ATTAGAGCGGGATTAATAACTAAAGGACCGAAACCTTAAACAACCTTTTTCGACCCGGAGGAGGGGCA**C**CCATATATAAAC**C**CTATAGTCTTAGGA : 1561

```

*      1740      *      1760      *      1780      *      1800      *      1820      *      1840      *      1860
Bos_taurus      : ACCCGGANGCTACATCTTAATCTTACCGGGTTGGATAAATCTGATATGCGACCTACATACTGGAAAAAAGAAACCTGGGTATAAGGGNATAGTGGGTATAAGGCAATGGATTCCTAGG : 1727
Hylobates_lar  : ACCCGGANGCTTATATCTTAACTCCACCGGGTTGGATAAATCTGATATGCGACCTACATACTGGAAAAAAGAAACCTGGGTATAAGGGNATAGTGGGTATAAGGCAATGGATTCCTAGG : 1733
Lemur_catta    : ACCCGGANGCTTATATCTTAACTCCACCGGGTTGGATAAATCTGATATGCGACCTACATACTGGAAAAAAGAAACCTGGGTATAAGGGNATAGTGGGTATAAGGCAATGGATTCCTAGG : 1733
Nycticebus_coucang : ACCCGGANGCTACATCTTAACTCCACCGGGTTGGATAAATCTGATATGCGACCTACATACTGGAAAAAAGAAACCTGGGTATAAGGGNATAGTGGGTATAAGGCAATGGATTCCTAGG : 1730
Tarsius_bancanus : ACCCGGANGCTTATATCTTAACTCCACCGGGTTGGATAAATCTGATATGCGACCTACATACTGGAAAAAAGAAACCTGGGTATAAGGGNATAGTGGGTATAAGGCAATGGATTCCTAGG : 1730
Gorilla_gorilla : ACCCGGANGCTTATATCTTAACTCCACCGGGTTGGATAAATCTGATATGCGACCTACATACTGGAAAAAAGAAACCTGGGTATAAGGGNATAGTGGGTATAAGGCAATGGATTCCTAGG : 1733
Homo_sapiens   : ACCCGGANGCTTATATCTTAACTCCACCGGGTTGGATAAATCTGATATGCGACCTACATACTGGAAAAAAGAAACCTGGGTATAAGGGNATAGTGGGTATAAGGCAATGGATTCCTAGG : 1733
Papio_hamadryas : ACCCGGANGCTTATATCTTAACTCCACCGGGTTGGATAAATCTGATATGCGACCTACATACTGGAAAAAAGAAACCTGGGTATAAGGGNATAGTGGGTATAAGGCAATGGATTCCTAGG : 1733
Cebus_albifrons : ACCCGGANGCTTATATCTTAACTCCACCGGGTTGGATAAATCTGATATGCGACCTACATACTGGAAAAAAGAAACCTGGGTATAAGGGNATAGTGGGTATAAGGCAATGGATTCCTAGG : 1727
Macaca_sylvanus : ACCCGGANGCTACATCTTAACTCCACCGGGTTGGGTAGCTCCCGCATCTGAGCCATTAATCTGGAAAAAAGAAACCTGGGTATAAGGGNATAGTGGGTATAAGGCAATGGATTCCTAGG : 1727
Pongo_pygmaeus : ACCCGGANGCTACATCTTAACTCCACCGGGTTGGATAAATCTGATATGCGACCTACATACTGGAAAAAAGAAACCTGGGTATAAGGGNATAGTGGGTATAAGGCAATGGATTCCTAGG : 1733
Pan_paniscus   : ACCCGGANGCTTATATCTTAACTCCACCGGGTTGGATAAATCTGATATGCGACCTACATACTGGAAAAAAGAAACCTGGGTATAAGGGNATAGTGGGTATAAGGCAATGGATTCCTAGG : 1733
Agkistrodon_piscivorus : ACCCGGANGCTTATATCTTAACTCCACCGGGTTGGATAAATCTGATATGCGACCTACATACTGGAAAAAAGAAACCTGGGTATAAGGGNATAGTGGGTATAAGGCAATGGATTCCTAGG : 1691
Pantherophis_guttatus : ACCCGGANGCTTATATCTTAACTCCACCGGGTTGGATAAATCTGATATGCGACCTACATACTGGAAAAAAGAAACCTGGGTATAAGGGNATAGTGGGTATAAGGCAATGGATTCCTAGG : 1685
Dinodon_semicarinatus : ACCCGGANGCTTATATCTTAACTCCACCGGGTTGGATAAATCTGATATGCGACCTACATACTGGAAAAAAGAAACCTGGGTATAAGGGNATAGTGGGTATAAGGCAATGGATTCCTAGG : 1685
Boa_constrictor : ACCCGGANGCTTATATCTTAACTCCACCGGGTTGGATAAATCTGATATGCGACCTACATACTGGAAAAAAGAAACCTGGGTATAAGGGNATAGTGGGTATAAGGCAATGGATTCCTAGG : 1694
Python_regius  : ACCCGGANGCTTATATCTTAACTCCACCGGGTTGGATAAATCTGATATGCGACCTACATACTGGAAAAAAGAAACCTGGGTATAAGGGNATAGTGGGTATAAGGCAATGGATTCCTAGG : 1694
Acrochordus_granulatus : ACCCGGANGCTTATATCTTAACTCCACCGGGTTGGATAAATCTGATATGCGACCTACATACTGGAAAAAAGAAACCTGGGTATAAGGGNATAGTGGGTATAAGGCAATGGATTCCTAGG : 1694
Cylindrophis_ruffus : ACCCGGANGCTTATATCTTAACTCCACCGGGTTGGATAAATCTGATATGCGACCTACATACTGGAAAAAAGAAACCTGGGTATAAGGGNATAGTGGGTATAAGGCAATGGATTCCTAGG : 1694
Ovophis_okinavensis : ACCCGGANGCTTATATCTTAACTCCACCGGGTTGGATAAATCTGATATGCGACCTACATACTGGAAAAAAGAAACCTGGGTATAAGGGNATAGTGGGTATAAGGCAATGGATTCCTAGG : 1691
Xenopeltis_unicolor : ACCCGGANGCTACATCTTAACTCCACCGGGTTGGATAAATCTGATATGCGACCTACATACTGGAAAAAAGAAACCTGGGTATAAGGGNATAGTGGGTATAAGGCAATGGATTCCTAGG : 1697
Typhlops_reticulatus : ACCCGGANGCTACATCTTAACTCCACCGGGTTGGATAAATCTGATATGCGACCTACATACTGGAAAAAAGAAACCTGGGTATAAGGGNATAGTGGGTATAAGGCAATGGATTCCTAGG : 1688
Leptotyphlops_dulcis : ACCCGGANGCTACATCTTAACTCCACCGGGTTGGATAAATCTGATATGCGACCTACATACTGGAAAAAAGAAACCTGGGTATAAGGGNATAGTGGGTATAAGGCAATGGATTCCTAGG : 1688
Caiman_crocodilus : ACCCGGANGCTTATATCTTAACTCCACCGGGTTGGATAAATCTGATATGCGACCTACATACTGGAAAAAAGAAACCTGGGTATAAGGGNATAGTGGGTATAAGGCAATGGATTCCTAGG : 1700
Alligator_sinensis : ACCCGGANGCTTATATCTTAACTCCACCGGGTTGGATAAATCTGATATGCGACCTACATACTGGAAAAAAGAAACCTGGGTATAAGGGNATAGTGGGTATAAGGCAATGGATTCCTAGG : 1712
Alligator_mississippiensis : ACCCGGANGCTTATATCTTAACTCCACCGGGTTGGATAAATCTGATATGCGACCTACATACTGGAAAAAAGAAACCTGGGTATAAGGGNATAGTGGGTATAAGGCAATGGATTCCTAGG : 1685
Gavialis_gangeticus : ACCCGGANGCTACATCTTAACTCCACCGGGTTGGATAAATCTGATATGCGACCTACATACTGGAAAAAAGAAACCTGGGTATAAGGGNATAGTGGGTATAAGGCAATGGATTCCTAGG : 1700
Crocodylus_moreletii : ACCCGGANGCTACATCTTAACTCCACCGGGTTGGATAAATCTGATATGCGACCTACATACTGGAAAAAAGAAACCTGGGTATAAGGGNATAGTGGGTATAAGGCAATGGATTCCTAGG : 1700
Dogania_subplana : ACCCGGANGCTACATCTTAACTCCACCGGGTTGGATAAATCTGATATGCGACCTACATACTGGAAAAAAGAAACCTGGGTATAAGGGNATAGTGGGTATAAGGCAATGGATTCCTAGG : 1694
Pelomedusa_subrufa : ACCCGGANGCTACATCTTAACTCCACCGGGTTGGATAAATCTGATATGCGACCTACATACTGGAAAAAAGAAACCTGGGTATAAGGGNATAGTGGGTATAAGGCAATGGATTCCTAGG : 1700
Chelysemys_picta : ACCCGGANGCTACATCTTAACTCCACCGGGTTGGATAAATCTGATATGCGACCTACATACTGGAAAAAAGAAACCTGGGTATAAGGGNATAGTGGGTATAAGGCAATGGATTCCTAGG : 1718
Helonia_mydas  : ACCCGGANGCTACATCTTAACTCCACCGGGTTGGATAAATCTGATATGCGACCTACATACTGGAAAAAAGAAACCTGGGTATAAGGGNATAGTGGGTATAAGGCAATGGATTCCTAGG : 1715
Tinamus_major  : ACCCGGANGCTACATCTTAACTCCACCGGGTTGGATAAATCTGATATGCGACCTACATACTGGAAAAAAGAAACCTGGGTATAAGGGNATAGTGGGTATAAGGCAATGGATTCCTAGG : 1700
Smithornis_sharpei : ACCCGGANGCTACATCTTAACTCCACCGGGTTGGATAAATCTGATATGCGACCTACATACTGGAAAAAAGAAACCTGGGTATAAGGGNATAGTGGGTATAAGGCAATGGATTCCTAGG : 1700
Corvus_frugilegus : ACCCGGANGCTTATATCTTAACTCCACCGGGTTGGATAAATCTGATATGCGACCTACATACTGGAAAAAAGAAACCTGGGTATAAGGGNATAGTGGGTATAAGGCAATGGATTCCTAGG : 1700
Vidua_chalybeata : ACCCGGANGCTACATCTTAACTCCACCGGGTTGGATAAATCTGATATGCGACCTACATACTGGAAAAAAGAAACCTGGGTATAAGGGNATAGTGGGTATAAGGCAATGGATTCCTAGG : 1700
Buteo_buteo    : ACCCGGANGCTTATATCTTAACTCCACCGGGTTGGATAAATCTGATATGCGACCTACATACTGGAAAAAAGAAACCTGGGTATAAGGGNATAGTGGGTATAAGGCAATGGATTCCTAGG : 1700
Falco_peregrinus : ACCCGGANGCTTATATCTTAACTCCACCGGGTTGGATAAATCTGATATGCGACCTACATACTGGAAAAAAGAAACCTGGGTATAAGGGNATAGTGGGTATAAGGCAATGGATTCCTAGG : 1700
Dromaius_novaeollandiae : ACCCGGANGCTACATCTTAACTCCACCGGGTTGGATAAATCTGATATGCGACCTACATACTGGAAAAAAGAAACCTGGGTATAAGGGNATAGTGGGTATAAGGCAATGGATTCCTAGG : 1700
Struthio_camelus : ACCCGGANGCTTATATCTTAACTCCACCGGGTTGGATAAATCTGATATGCGACCTACATACTGGAAAAAAGAAACCTGGGTATAAGGGNATAGTGGGTATAAGGCAATGGATTCCTAGG : 1700
Apteryx_haastii : ACCCGGANGCTTATATCTTAACTCCACCGGGTTGGATAAATCTGATATGCGACCTACATACTGGAAAAAAGAAACCTGGGTATAAGGGNATAGTGGGTATAAGGCAATGGATTCCTAGG : 1700
Rhea_americanana : ACCCGGANGCTTATATCTTAACTCCACCGGGTTGGATAAATCTGATATGCGACCTACATACTGGAAAAAAGAAACCTGGGTATAAGGGNATAGTGGGTATAAGGCAATGGATTCCTAGG : 1700
Gallus_gallus  : ACCCGGANGCTTATATCTTAACTCCACCGGGTTGGATAAATCTGATATGCGACCTACATACTGGAAAAAAGAAACCTGGGTATAAGGGNATAGTGGGTATAAGGCAATGGATTCCTAGG : 1694
Ciconia_ciconia : ACCCGGANGCTACATCTTAACTCCACCGGGTTGGATAAATCTGATATGCGACCTACATACTGGAAAAAAGAAACCTGGGTATAAGGGNATAGTGGGTATAAGGCAATGGATTCCTAGG : 1700
Ciconia_boyciana : ACCCGGANGCTACATCTTAACTCCACCGGGTTGGATAAATCTGATATGCGACCTACATACTGGAAAAAAGAAACCTGGGTATAAGGGNATAGTGGGTATAAGGCAATGGATTCCTAGG : 1700
Iguana_iguana  : ACCCGGANGCTACATCTTAACTCCACCGGGTTGGATAAATCTGATATGCGACCTACATACTGGAAAAAAGAAACCTGGGTATAAGGGNATAGTGGGTATAAGGCAATGGATTCCTAGG : 1697
Fumeces_egregius : ACCCGGANGCTACATCTTAACTCCACCGGGTTGGATAAATCTGATATGCGACCTACATACTGGAAAAAAGAAACCTGGGTATAAGGGNATAGTGGGTATAAGGCAATGGATTCCTAGG : 1697
Sphenodon_punctatus : ACCCGGANGCTTATATCTTAACTCCACCGGGTTGGATAAATCTGATATGCGACCTACATACTGGAAAAAAGAAACCTGGGTATAAGGGNATAGTGGGTATAAGGCAATGGATTCCTAGG : 1694
Sceloporus_occidentalis : ACCCGGANGCTACATCTTAACTCCACCGGGTTGGATAAATCTGATATGCGACCTACATACTGGAAAAAAGAAACCTGGGTATAAGGGNATAGTGGGTATAAGGCAATGGATTCCTAGG : 1697
Cordylus_warreni : ACCCGGANGCTACATCTTAACTCCACCGGGTTGGATAAATCTGATATGCGACCTACATACTGGAAAAAAGAAACCTGGGTATAAGGGNATAGTGGGTATAAGGCAATGGATTCCTAGG : 1694
Abronia_graminea : ACCCGGANGCTACATCTTAACTCCACCGGGTTGGATAAATCTGATATGCGACCTACATACTGGAAAAAAGAAACCTGGGTATAAGGGNATAGTGGGTATAAGGCAATGGATTCCTAGG : 1697
Shinisaurus_crocodilurus : ACCCGGANGCTTATATCTTAACTCCACCGGGTTGGATAAATCTGATATGCGACCTACATACTGGAAAAAAGAAACCTGGGTATAAGGGNATAGTGGGTATAAGGCAATGGATTCCTAGG : 1694
Varanus_komodoensis : ACCCGGANGCTTATATCTTAACTCCACCGGGTTGGATAAATCTGATATGCGACCTACATACTGGAAAAAAGAAACCTGGGTATAAGGGNATAGTGGGTATAAGGCAATGGATTCCTAGG : 1694
Rhineura_floridana : ACCCGGANGCTTATATCTTAACTCCACCGGGTTGGATAAATCTGATATGCGACCTACATACTGGAAAAAAGAAACCTGGGTATAAGGGNATAGTGGGTATAAGGCAATGGATTCCTAGG : 1694
Geocalamus_acutus : ACCCGGANGCTTATATCTTAACTCCACCGGGTTGGATAAATCTGATATGCGACCTACATACTGGAAAAAAGAAACCTGGGTATAAGGGNATAGTGGGTATAAGGCAATGGATTCCTAGG : 1688
Diplometopon_zarudnyi : ACCCGGANGCTTATATCTTAACTCCACCGGGTTGGATAAATCTGATATGCGACCTACATACTGGAAAAAAGAAACCTGGGTATAAGGGNATAGTGGGTATAAGGCAATGGATTCCTAGG : 1688
Amphisbaena_schmidti : ACCCGGANGCTTATATCTTAACTCCACCGGGTTGGATAAATCTGATATGCGACCTACATACTGGAAAAAAGAAACCTGGGTATAAGGGNATAGTGGGTATAAGGCAATGGATTCCTAGG : 1694
Bipes_tridactylus : ACCCGGANGCTTATATCTTAACTCCACCGGGTTGGATAAATCTGATATGCGACCTACATACTGGAAAAAAGAAACCTGGGTATAAGGGNATAGTGGGTATAAGGCAATGGATTCCTAGG : 1688
Bipes_canaliculatus : ACCCGGANGCTTATATCTTAACTCCACCGGGTTGGATAAATCTGATATGCGACCTACATACTGGAAAAAAGAAACCTGGGTATAAGGGNATAGTGGGTATAAGGCAATGGATTCCTAGG : 1688
Bipes_biporus  : ACCCGGANGCTTATATCTTAACTCCACCGGGTTGGATAAATCTGATATGCGACCTACATACTGGAAAAAAGAAACCTGGGTATAAGGGNATAGTGGGTATAAGGCAATGGATTCCTAGG : 1688
Anolis_carolinensis : ACCCGGANGCTTATATCTTAACTCCACCGGGTTGGATAAATCTGATATGCGACCTACATACTGGAAAAAAGAAACCTGGGTATAAGGGNATAGTGGGTATAAGGCAATGGATTCCTAGG : 1696
Ophisaurus_atnuatus : ACCCGGANGCTTATATCTTAACTCCACCGGGTTGGATAAATCTGATATGCGACCTACATACTGGAAAAAAGAAACCTGGGTATAAGGGNATAGTGGGTATAAGGCAATGGATTCCTAGG : 1697
Varanus_salvator : ACCCGGANGCTTATATCTTAACTCCACCGGGTTGGATAAATCTGATATGCGACCTACATACTGGAAAAAAGAAACCTGGGTATAAGGGNATAGTGGGTATAAGGCAATGGATTCCTAGG : 1694
Mertensiella_luschani : ACCCGGANGCTTATATCTTAACTCCACCGGGTTGGATAAATCTGATATGCGACCTACATACTGGAAAAAAGAAACCTGGGTATAAGGGNATAGTGGGTATAAGGCAATGGATTCCTAGG : 1697
Xenopus_laevis : ACCCGGANGCTTATATCTTAACTCCACCGGGTTGGATAAATCTGATATGCGACCTACATACTGGAAAAAAGAAACCTGGGTATAAGGGNATAGTGGGTATAAGGCAATGGATTCCTAGG : 1694

```



|                            | * | 1880                                                                                                                      | * | 1900 | * | 1920 | * | 1940 | * | 1960 | * | 1980 | * |  |
|----------------------------|---|---------------------------------------------------------------------------------------------------------------------------|---|------|---|------|---|------|---|------|---|------|---|--|
| Bos_taurus                 | : | TTTCATGCTATGGCCGCCCAATATATACAGGGAAATGAGCGGNCACACGGCCCTACTTTCCACATCGCCCAATAAATAAGTATTCACACGGGGAAAAGCTTCGTCGTCGGCAACACTCAAT | : | 1860 |   |      |   |      |   |      |   |      |   |  |
| Hylobates_lar              | : | TTTCATGCTATGGCCGCCCAATATATACAGGGAAATGAGCGGNCACACGGCCCTACTTTCCACATCGCCCAATAAATAAGTATTCACACGGGGAAAAGCTTCGTCGTCGGCAACACTCAAT | : | 1866 |   |      |   |      |   |      |   |      |   |  |
| Lemur_catta                | : | TTTCATGCTATGGCCGCCCAATATATACAGGGAAATGAGCGGNCACACGGCCCTACTTTCCACATCGCCCAATAAATAAGTATTCACACGGGGAAAAGCTTCGTCGTCGGCAACACTCAAT | : | 1866 |   |      |   |      |   |      |   |      |   |  |
| Nycticebus_coucang         | : | TTTCATGCTATGGCCGCCCAATATATACAGGGAAATGAGCGGNCACACGGCCCTACTTTCCACATCGCCCAATAAATAAGTATTCACACGGGGAAAAGCTTCGTCGTCGGCAACACTCAAT | : | 1863 |   |      |   |      |   |      |   |      |   |  |
| Tarsius_bancanus           | : | TTTCATGCTATGGCCGCCCAATATATACAGGGAAATGAGCGGNCACACGGCCCTACTTTCCACATCGCCCAATAAATAAGTATTCACACGGGGAAAAGCTTCGTCGTCGGCAACACTCAAT | : | 1863 |   |      |   |      |   |      |   |      |   |  |
| Gorilla_gorilla            | : | TTTCATGCTATGGCCGCCCAATATATACAGGGAAATGAGCGGNCACACGGCCCTACTTTCCACATCGCCCAATAAATAAGTATTCACACGGGGAAAAGCTTCGTCGTCGGCAACACTCAAT | : | 1866 |   |      |   |      |   |      |   |      |   |  |
| Homo_sapiens               | : | TTTCATGCTATGGCCGCCCAATATATACAGGGAAATGAGCGGNCACACGGCCCTACTTTCCACATCGCCCAATAAATAAGTATTCACACGGGGAAAAGCTTCGTCGTCGGCAACACTCAAT | : | 1866 |   |      |   |      |   |      |   |      |   |  |
| Papio_hamadryas            | : | TTTCATGCTATGGCCGCCCAATATATACAGGGAAATGAGCGGNCACACGGCCCTACTTTCCACATCGCCCAATAAATAAGTATTCACACGGGGAAAAGCTTCGTCGTCGGCAACACTCAAT | : | 1866 |   |      |   |      |   |      |   |      |   |  |
| Cebus_albifrons            | : | TTTCATGCTATGGCCGCCCAATATATACAGGGAAATGAGCGGNCACACGGCCCTACTTTCCACATCGCCCAATAAATAAGTATTCACACGGGGAAAAGCTTCGTCGTCGGCAACACTCAAT | : | 1860 |   |      |   |      |   |      |   |      |   |  |
| Macaca_sylvanus            | : | TTTCATGCTATGGCCGCCCAATATATACAGGGAAATGAGCGGNCACACGGCCCTACTTTCCACATCGCCCAATAAATAAGTATTCACACGGGGAAAAGCTTCGTCGTCGGCAACACTCAAT | : | 1860 |   |      |   |      |   |      |   |      |   |  |
| Pongo_pygmaeus             | : | TTTCATGCTATGGCCGCCCAATATATACAGGGAAATGAGCGGNCACACGGCCCTACTTTCCACATCGCCCAATAAATAAGTATTCACACGGGGAAAAGCTTCGTCGTCGGCAACACTCAAT | : | 1866 |   |      |   |      |   |      |   |      |   |  |
| Pan_paniscus               | : | TTTCATGCTATGGCCGCCCAATATATACAGGGAAATGAGCGGNCACACGGCCCTACTTTCCACATCGCCCAATAAATAAGTATTCACACGGGGAAAAGCTTCGTCGTCGGCAACACTCAAT | : | 1866 |   |      |   |      |   |      |   |      |   |  |
| Agkistrodon_piscivorus     | : | TTTCATGCTATGGCCGCCCAATATATACAGGGAAATGAGCGGNCACACGGCCCTACTTTCCACATCGCCCAATAAATAAGTATTCACACGGGGAAAAGCTTCGTCGTCGGCAACACTCAAT | : | 1824 |   |      |   |      |   |      |   |      |   |  |
| Pantherophis_guttatus      | : | TTTCATGCTATGGCCGCCCAATATATACAGGGAAATGAGCGGNCACACGGCCCTACTTTCCACATCGCCCAATAAATAAGTATTCACACGGGGAAAAGCTTCGTCGTCGGCAACACTCAAT | : | 1818 |   |      |   |      |   |      |   |      |   |  |
| Dinodon_semicarinatus      | : | TTTCATGCTATGGCCGCCCAATATATACAGGGAAATGAGCGGNCACACGGCCCTACTTTCCACATCGCCCAATAAATAAGTATTCACACGGGGAAAAGCTTCGTCGTCGGCAACACTCAAT | : | 1818 |   |      |   |      |   |      |   |      |   |  |
| Boa_constrictor            | : | TTTCATGCTATGGCCGCCCAATATATACAGGGAAATGAGCGGNCACACGGCCCTACTTTCCACATCGCCCAATAAATAAGTATTCACACGGGGAAAAGCTTCGTCGTCGGCAACACTCAAT | : | 1827 |   |      |   |      |   |      |   |      |   |  |
| Python_regius              | : | TTTCATGCTATGGCCGCCCAATATATACAGGGAAATGAGCGGNCACACGGCCCTACTTTCCACATCGCCCAATAAATAAGTATTCACACGGGGAAAAGCTTCGTCGTCGGCAACACTCAAT | : | 1827 |   |      |   |      |   |      |   |      |   |  |
| Acrochordus_granulatus     | : | TTTCATGCTATGGCCGCCCAATATATACAGGGAAATGAGCGGNCACACGGCCCTACTTTCCACATCGCCCAATAAATAAGTATTCACACGGGGAAAAGCTTCGTCGTCGGCAACACTCAAT | : | 1827 |   |      |   |      |   |      |   |      |   |  |
| Cylindrophis_ruffus        | : | TTTCATGCTATGGCCGCCCAATATATACAGGGAAATGAGCGGNCACACGGCCCTACTTTCCACATCGCCCAATAAATAAGTATTCACACGGGGAAAAGCTTCGTCGTCGGCAACACTCAAT | : | 1827 |   |      |   |      |   |      |   |      |   |  |
| Ovophis_okinavensis        | : | TTTCATGCTATGGCCGCCCAATATATACAGGGAAATGAGCGGNCACACGGCCCTACTTTCCACATCGCCCAATAAATAAGTATTCACACGGGGAAAAGCTTCGTCGTCGGCAACACTCAAT | : | 1824 |   |      |   |      |   |      |   |      |   |  |
| Xenopeltis_unicolor        | : | TTTCATGCTATGGCCGCCCAATATATACAGGGAAATGAGCGGNCACACGGCCCTACTTTCCACATCGCCCAATAAATAAGTATTCACACGGGGAAAAGCTTCGTCGTCGGCAACACTCAAT | : | 1830 |   |      |   |      |   |      |   |      |   |  |
| Yeniplops_reticulatus      | : | TTTCATGCTATGGCCGCCCAATATATACAGGGAAATGAGCGGNCACACGGCCCTACTTTCCACATCGCCCAATAAATAAGTATTCACACGGGGAAAAGCTTCGTCGTCGGCAACACTCAAT | : | 1821 |   |      |   |      |   |      |   |      |   |  |
| Leptotyphlops_dulcis       | : | TTTCATGCTATGGCCGCCCAATATATACAGGGAAATGAGCGGNCACACGGCCCTACTTTCCACATCGCCCAATAAATAAGTATTCACACGGGGAAAAGCTTCGTCGTCGGCAACACTCAAT | : | 1821 |   |      |   |      |   |      |   |      |   |  |
| Caiman_crocodilus          | : | TTTCATGCTATGGCCGCCCAATATATACAGGGAAATGAGCGGNCACACGGCCCTACTTTCCACATCGCCCAATAAATAAGTATTCACACGGGGAAAAGCTTCGTCGTCGGCAACACTCAAT | : | 1833 |   |      |   |      |   |      |   |      |   |  |
| Alligator_sinensis         | : | TTTCATGCTATGGCCGCCCAATATATACAGGGAAATGAGCGGNCACACGGCCCTACTTTCCACATCGCCCAATAAATAAGTATTCACACGGGGAAAAGCTTCGTCGTCGGCAACACTCAAT | : | 1845 |   |      |   |      |   |      |   |      |   |  |
| Alligator_mississippiensis | : | TTTCATGCTATGGCCGCCCAATATATACAGGGAAATGAGCGGNCACACGGCCCTACTTTCCACATCGCCCAATAAATAAGTATTCACACGGGGAAAAGCTTCGTCGTCGGCAACACTCAAT | : | 1818 |   |      |   |      |   |      |   |      |   |  |
| Gavialis_gangeticus        | : | TTTCATGCTATGGCCGCCCAATATATACAGGGAAATGAGCGGNCACACGGCCCTACTTTCCACATCGCCCAATAAATAAGTATTCACACGGGGAAAAGCTTCGTCGTCGGCAACACTCAAT | : | 1833 |   |      |   |      |   |      |   |      |   |  |
| Crocodylus_moreletii       | : | TTTCATGCTATGGCCGCCCAATATATACAGGGAAATGAGCGGNCACACGGCCCTACTTTCCACATCGCCCAATAAATAAGTATTCACACGGGGAAAAGCTTCGTCGTCGGCAACACTCAAT | : | 1833 |   |      |   |      |   |      |   |      |   |  |
| Dogania_subplana           | : | TTTCATGCTATGGCCGCCCAATATATACAGGGAAATGAGCGGNCACACGGCCCTACTTTCCACATCGCCCAATAAATAAGTATTCACACGGGGAAAAGCTTCGTCGTCGGCAACACTCAAT | : | 1827 |   |      |   |      |   |      |   |      |   |  |
| Pelomedusa_subrufa         | : | TTTCATGCTATGGCCGCCCAATATATACAGGGAAATGAGCGGNCACACGGCCCTACTTTCCACATCGCCCAATAAATAAGTATTCACACGGGGAAAAGCTTCGTCGTCGGCAACACTCAAT | : | 1833 |   |      |   |      |   |      |   |      |   |  |
| Chrysemys_picta            | : | TTTCATGCTATGGCCGCCCAATATATACAGGGAAATGAGCGGNCACACGGCCCTACTTTCCACATCGCCCAATAAATAAGTATTCACACGGGGAAAAGCTTCGTCGTCGGCAACACTCAAT | : | 1851 |   |      |   |      |   |      |   |      |   |  |
| Chelonia_mydas             | : | TTTCATGCTATGGCCGCCCAATATATACAGGGAAATGAGCGGNCACACGGCCCTACTTTCCACATCGCCCAATAAATAAGTATTCACACGGGGAAAAGCTTCGTCGTCGGCAACACTCAAT | : | 1848 |   |      |   |      |   |      |   |      |   |  |
| Tinamus_major              | : | TTTCATGCTATGGCCGCCCAATATATACAGGGAAATGAGCGGNCACACGGCCCTACTTTCCACATCGCCCAATAAATAAGTATTCACACGGGGAAAAGCTTCGTCGTCGGCAACACTCAAT | : | 1833 |   |      |   |      |   |      |   |      |   |  |
| Smithornis_sharpei         | : | TTTCATGCTATGGCCGCCCAATATATACAGGGAAATGAGCGGNCACACGGCCCTACTTTCCACATCGCCCAATAAATAAGTATTCACACGGGGAAAAGCTTCGTCGTCGGCAACACTCAAT | : | 1833 |   |      |   |      |   |      |   |      |   |  |
| Corvus_frugilegus          | : | TTTCATGCTATGGCCGCCCAATATATACAGGGAAATGAGCGGNCACACGGCCCTACTTTCCACATCGCCCAATAAATAAGTATTCACACGGGGAAAAGCTTCGTCGTCGGCAACACTCAAT | : | 1833 |   |      |   |      |   |      |   |      |   |  |
| Vidua_chalybeata           | : | TTTCATGCTATGGCCGCCCAATATATACAGGGAAATGAGCGGNCACACGGCCCTACTTTCCACATCGCCCAATAAATAAGTATTCACACGGGGAAAAGCTTCGTCGTCGGCAACACTCAAT | : | 1833 |   |      |   |      |   |      |   |      |   |  |
| Buteo_buteo                | : | TTTCATGCTATGGCCGCCCAATATATACAGGGAAATGAGCGGNCACACGGCCCTACTTTCCACATCGCCCAATAAATAAGTATTCACACGGGGAAAAGCTTCGTCGTCGGCAACACTCAAT | : | 1833 |   |      |   |      |   |      |   |      |   |  |
| Falco_peregrinus           | : | TTTCATGCTATGGCCGCCCAATATATACAGGGAAATGAGCGGNCACACGGCCCTACTTTCCACATCGCCCAATAAATAAGTATTCACACGGGGAAAAGCTTCGTCGTCGGCAACACTCAAT | : | 1833 |   |      |   |      |   |      |   |      |   |  |
| Dromaius_novaeollandiae    | : | TTTCATGCTATGGCCGCCCAATATATACAGGGAAATGAGCGGNCACACGGCCCTACTTTCCACATCGCCCAATAAATAAGTATTCACACGGGGAAAAGCTTCGTCGTCGGCAACACTCAAT | : | 1833 |   |      |   |      |   |      |   |      |   |  |
| Struthio_camelus           | : | TTTCATGCTATGGCCGCCCAATATATACAGGGAAATGAGCGGNCACACGGCCCTACTTTCCACATCGCCCAATAAATAAGTATTCACACGGGGAAAAGCTTCGTCGTCGGCAACACTCAAT | : | 1833 |   |      |   |      |   |      |   |      |   |  |
| Apteryx_haastii            | : | TTTCATGCTATGGCCGCCCAATATATACAGGGAAATGAGCGGNCACACGGCCCTACTTTCCACATCGCCCAATAAATAAGTATTCACACGGGGAAAAGCTTCGTCGTCGGCAACACTCAAT | : | 1833 |   |      |   |      |   |      |   |      |   |  |
| Rhea_americana             | : | TTTCATGCTATGGCCGCCCAATATATACAGGGAAATGAGCGGNCACACGGCCCTACTTTCCACATCGCCCAATAAATAAGTATTCACACGGGGAAAAGCTTCGTCGTCGGCAACACTCAAT | : | 1833 |   |      |   |      |   |      |   |      |   |  |
| Gallus_gallus              | : | TTTCATGCTATGGCCGCCCAATATATACAGGGAAATGAGCGGNCACACGGCCCTACTTTCCACATCGCCCAATAAATAAGTATTCACACGGGGAAAAGCTTCGTCGTCGGCAACACTCAAT | : | 1827 |   |      |   |      |   |      |   |      |   |  |
| Ciconia_ciconia            | : | TTTCATGCTATGGCCGCCCAATATATACAGGGAAATGAGCGGNCACACGGCCCTACTTTCCACATCGCCCAATAAATAAGTATTCACACGGGGAAAAGCTTCGTCGTCGGCAACACTCAAT | : | 1833 |   |      |   |      |   |      |   |      |   |  |
| Ciconia_boycciana          | : | TTTCATGCTATGGCCGCCCAATATATACAGGGAAATGAGCGGNCACACGGCCCTACTTTCCACATCGCCCAATAAATAAGTATTCACACGGGGAAAAGCTTCGTCGTCGGCAACACTCAAT | : | 1833 |   |      |   |      |   |      |   |      |   |  |
| Iguana_iguana              | : | TTTCATGCTATGGCCGCCCAATATATACAGGGAAATGAGCGGNCACACGGCCCTACTTTCCACATCGCCCAATAAATAAGTATTCACACGGGGAAAAGCTTCGTCGTCGGCAACACTCAAT | : | 1830 |   |      |   |      |   |      |   |      |   |  |
| Eumeces_egregius           | : | TTTCATGCTATGGCCGCCCAATATATACAGGGAAATGAGCGGNCACACGGCCCTACTTTCCACATCGCCCAATAAATAAGTATTCACACGGGGAAAAGCTTCGTCGTCGGCAACACTCAAT | : | 1830 |   |      |   |      |   |      |   |      |   |  |
| Sphenodon_punctatus        | : | TTTCATGCTATGGCCGCCCAATATATACAGGGAAATGAGCGGNCACACGGCCCTACTTTCCACATCGCCCAATAAATAAGTATTCACACGGGGAAAAGCTTCGTCGTCGGCAACACTCAAT | : | 1827 |   |      |   |      |   |      |   |      |   |  |
| Sceloporus_occidentalis    | : | TTTCATGCTATGGCCGCCCAATATATACAGGGAAATGAGCGGNCACACGGCCCTACTTTCCACATCGCCCAATAAATAAGTATTCACACGGGGAAAAGCTTCGTCGTCGGCAACACTCAAT | : | 1830 |   |      |   |      |   |      |   |      |   |  |
| Cordylus_warreni           | : | TTTCATGCTATGGCCGCCCAATATATACAGGGAAATGAGCGGNCACACGGCCCTACTTTCCACATCGCCCAATAAATAAGTATTCACACGGGGAAAAGCTTCGTCGTCGGCAACACTCAAT | : | 1827 |   |      |   |      |   |      |   |      |   |  |
| Abronia_graminea           | : | TTTCATGCTATGGCCGCCCAATATATACAGGGAAATGAGCGGNCACACGGCCCTACTTTCCACATCGCCCAATAAATAAGTATTCACACGGGGAAAAGCTTCGTCGTCGGCAACACTCAAT | : | 1830 |   |      |   |      |   |      |   |      |   |  |
| Shinisaurus_crocodilurus   | : | TTTCATGCTATGGCCGCCCAATATATACAGGGAAATGAGCGGNCACACGGCCCTACTTTCCACATCGCCCAATAAATAAGTATTCACACGGGGAAAAGCTTCGTCGTCGGCAACACTCAAT | : | 1827 |   |      |   |      |   |      |   |      |   |  |
| Varanus_komodoensis        | : | TTTCATGCTATGGCCGCCCAATATATACAGGGAAATGAGCGGNCACACGGCCCTACTTTCCACATCGCCCAATAAATAAGTATTCACACGGGGAAAAGCTTCGTCGTCGGCAACACTCAAT | : | 1827 |   |      |   |      |   |      |   |      |   |  |
| Rhineura_floridana         | : | TTTCATGCTATGGCCGCCCAATATATACAGGGAAATGAGCGGNCACACGGCCCTACTTTCCACATCGCCCAATAAATAAGTATTCACACGGGGAAAAGCTTCGTCGTCGGCAACACTCAAT | : | 1827 |   |      |   |      |   |      |   |      |   |  |
| Geocalamus_acutus          | : | TTTCATGCTATGGCCGCCCAATATATACAGGGAAATGAGCGGNCACACGGCCCTACTTTCCACATCGCCCAATAAATAAGTATTCACACGGGGAAAAGCTTCGTCGTCGGCAACACTCAAT | : | 1821 |   |      |   |      |   |      |   |      |   |  |
| Diplometopon_zarudnyi      | : | TTTCATGCTATGGCCGCCCAATATATACAGGGAAATGAGCGGNCACACGGCCCTACTTTCCACATCGCCCAATAAATAAGTATTCACACGGGGAAAAGCTTCGTCGTCGGCAACACTCAAT | : | 1821 |   |      |   |      |   |      |   |      |   |  |
| Amphisbaena_schmidti       | : | TTTCATGCTATGGCCGCCCAATATATACAGGGAAATGAGCGGNCACACGGCCCTACTTTCCACATCGCCCAATAAATAAGTATTCACACGGGGAAAAGCTTCGTCGTCGGCAACACTCAAT | : | 1827 |   |      |   |      |   |      |   |      |   |  |
| Bipes_tridactylus          | : | TTTCATGCTATGGCCGCCCAATATATACAGGGAAATGAGCGGNCACACGGCCCTACTTTCCACATCGCCCAATAAATAAGTATTCACACGGGGAAAAGCTTCGTCGTCGGCAACACTCAAT | : | 1821 |   |      |   |      |   |      |   |      |   |  |
| Bipes_canaliculatus        | : | TTTCATGCTATGGCCGCCCAATATATACAGGGAAATGAGCGGNCACACGGCCCTACTTTCCACATCGCCCAATAAATAAGTATTCACACGGGGAAAAGCTTCGTCGTCGGCAACACTCAAT | : | 1821 |   |      |   |      |   |      |   |      |   |  |
| Bipes_biporus              | : | TTTCATGCTATGGCCGCCCAATATATACAGGGAAATGAGCGGNCACACGGCCCTACTTTCCACATCGCCCAATAAATAAGTATTCACACGGGGAAAAGCTTCGTCGTCGGCAACACTCAAT | : | 1821 |   |      |   |      |   |      |   |      |   |  |
| Anolis_carolinensis        | : | TTTCATGCTATGGCCGCCCAATATATACAGGGAAATGAGCGGNCACACGGCCCTACTTTCCACATCGCCCAATAAATAAGTATTCACACGGGGAAAAGCTTCGTCGTCGGCAACACTCAAT | : | 1829 |   |      |   |      |   |      |   |      |   |  |
| Ophisaurus_atnuatus        | : | TTTCATGCTATGGCCGCCCAATATATACAGGGAAATGAGCGGNCACACGGCCCTACTTTCCACATCGCCCAATAAATAAGTATTCACACGGGGAAAAGCTTCGTCGTCGGCAACACTCAAT | : | 1830 |   |      |   |      |   |      |   |      |   |  |
| Varanus_salvator           | : | TTTCATGCTATGGCCGCCCAATATATACAGGGAAATGAGCGGNCACACGGCCCTACTTTCCACATCGCCCAATAAATAAGTATTCACACGGGGAAAAGCTTCGTCGTCGGCAACACTCAAT | : | 1827 |   |      |   |      |   |      |   |      |   |  |
| Mertensiella_luschani      | : | TTTCATGCTATGGCCGCCCAATATATACAGGGAAATGAGCGGNCACACGGCCCTACTTTCCACATCGCCCAATAAATAAGTATTCACACGGGGAAAAGCTTCGTCGTCGGCAACACTCAAT | : | 1830 |   |      |   |      |   |      |   |      |   |  |
| Xenopus_laevis             | : | TTTCATGCTATGGCCGCCCAATATATACAGGGAAATGAGCGGNCACACGGCCCTACTTTCCACATCGCCCAATAAATAAGTATTCACACGGGGAAAAGCTTCGTCGTCGGCAACACTCAAT | : | 1827 |   |      |   |      |   |      |   |      |   |  |



|                            | 2000 | *  | 2020 | *  | 2040 | *  | 2060 | *  | 2080 | *  | 2100 | *  | 2120 |        |
|----------------------------|------|----|------|----|------|----|------|----|------|----|------|----|------|--------|
| Bos_taurus                 | : GG | GG | AA   | AT | AA   | AT | AA   | AT | AA   | AT | AA   | AT | AA   | : 1993 |
| Hylobates_lar              | : GG | GG | AA   | AT | AA   | AT | AA   | AT | AA   | AT | AA   | AT | AA   | : 1999 |
| Lemur_catta                | : GG | GG | AA   | AT | AA   | AT | AA   | AT | AA   | AT | AA   | AT | AA   | : 1999 |
| Nycticebus_coucang         | : GG | GG | AA   | AT | AA   | AT | AA   | AT | AA   | AT | AA   | AT | AA   | : 1996 |
| Tarsius_bancanus           | : GG | GG | AA   | AT | AA   | AT | AA   | AT | AA   | AT | AA   | AT | AA   | : 1996 |
| Gorilla_gorilla            | : GG | GG | AA   | AT | AA   | AT | AA   | AT | AA   | AT | AA   | AT | AA   | : 1999 |
| Homo_sapiens               | : GG | GG | AA   | AT | AA   | AT | AA   | AT | AA   | AT | AA   | AT | AA   | : 1999 |
| Papio_hamadryas            | : GG | GG | AA   | AT | AA   | AT | AA   | AT | AA   | AT | AA   | AT | AA   | : 1999 |
| Cebus_albifrons            | : GG | GG | AA   | AT | AA   | AT | AA   | AT | AA   | AT | AA   | AT | AA   | : 1993 |
| Macaca_sylvanus            | : GG | GG | AA   | AT | AA   | AT | AA   | AT | AA   | AT | AA   | AT | AA   | : 1993 |
| Pongo_pygmaeus             | : GG | GG | AA   | AT | AA   | AT | AA   | AT | AA   | AT | AA   | AT | AA   | : 1999 |
| Pan_paniscus               | : GG | GG | AA   | AT | AA   | AT | AA   | AT | AA   | AT | AA   | AT | AA   | : 1999 |
| Agkistrodon_piscivorus     | : GG | GG | AA   | AT | AA   | AT | AA   | AT | AA   | AT | AA   | AT | AA   | : 1957 |
| Pantherophis_guttatus      | : GG | GG | AA   | AT | AA   | AT | AA   | AT | AA   | AT | AA   | AT | AA   | : 1951 |
| Dinodon_semicarinatus      | : GG | GG | AA   | AT | AA   | AT | AA   | AT | AA   | AT | AA   | AT | AA   | : 1951 |
| Boa_constrictor            | : GG | GG | AA   | AT | AA   | AT | AA   | AT | AA   | AT | AA   | AT | AA   | : 1960 |
| Python_regius              | : GG | GG | AA   | AT | AA   | AT | AA   | AT | AA   | AT | AA   | AT | AA   | : 1960 |
| Acrochordus_granulatus     | : GG | GG | AA   | AT | AA   | AT | AA   | AT | AA   | AT | AA   | AT | AA   | : 1960 |
| Cylindrophis_ruffus        | : GG | GG | AA   | AT | AA   | AT | AA   | AT | AA   | AT | AA   | AT | AA   | : 1960 |
| Ovophis_okinavensis        | : GG | GG | AA   | AT | AA   | AT | AA   | AT | AA   | AT | AA   | AT | AA   | : 1957 |
| Xenopeltis_unicolor        | : GG | GG | AA   | AT | AA   | AT | AA   | AT | AA   | AT | AA   | AT | AA   | : 1963 |
| Typhlops_reticulatus       | : GG | GG | AA   | AT | AA   | AT | AA   | AT | AA   | AT | AA   | AT | AA   | : 1954 |
| Leptotyphlops_dulcis       | : GG | GG | AA   | AT | AA   | AT | AA   | AT | AA   | AT | AA   | AT | AA   | : 1954 |
| Caiman_crocodilus          | : GG | GG | AA   | AT | AA   | AT | AA   | AT | AA   | AT | AA   | AT | AA   | : 1966 |
| Alligator_sinensis         | : GG | GG | AA   | AT | AA   | AT | AA   | AT | AA   | AT | AA   | AT | AA   | : 1978 |
| Alligator_mississippiensis | : GG | GG | AA   | AT | AA   | AT | AA   | AT | AA   | AT | AA   | AT | AA   | : 1951 |
| Gavialis_gangeticus        | : GG | GG | AA   | AT | AA   | AT | AA   | AT | AA   | AT | AA   | AT | AA   | : 1966 |
| Crocodylus_moreletii       | : GG | GG | AA   | AT | AA   | AT | AA   | AT | AA   | AT | AA   | AT | AA   | : 1966 |
| Dogania_subplana           | : GG | GG | AA   | AT | AA   | AT | AA   | AT | AA   | AT | AA   | AT | AA   | : 1960 |
| Pelomedusa_subrufa         | : GG | GG | AA   | AT | AA   | AT | AA   | AT | AA   | AT | AA   | AT | AA   | : 1966 |
| Chrysemys_picta            | : GG | GG | AA   | AT | AA   | AT | AA   | AT | AA   | AT | AA   | AT | AA   | : 1984 |
| Chelonia_mydas             | : GG | GG | AA   | AT | AA   | AT | AA   | AT | AA   | AT | AA   | AT | AA   | : 1981 |
| Tinamus_major              | : GG | GG | AA   | AT | AA   | AT | AA   | AT | AA   | AT | AA   | AT | AA   | : 1966 |
| Smithornis_sharpei         | : GG | GG | AA   | AT | AA   | AT | AA   | AT | AA   | AT | AA   | AT | AA   | : 1966 |
| Corvus_frugilegus          | : GG | GG | AA   | AT | AA   | AT | AA   | AT | AA   | AT | AA   | AT | AA   | : 1966 |
| Vidua_chalybeata           | : GG | GG | AA   | AT | AA   | AT | AA   | AT | AA   | AT | AA   | AT | AA   | : 1966 |
| Buteo_buteo                | : GG | GG | AA   | AT | AA   | AT | AA   | AT | AA   | AT | AA   | AT | AA   | : 1966 |
| Falco_peregrinus           | : GG | GG | AA   | AT | AA   | AT | AA   | AT | AA   | AT | AA   | AT | AA   | : 1966 |
| Dromaius_novaeollandiae    | : GG | GG | AA   | AT | AA   | AT | AA   | AT | AA   | AT | AA   | AT | AA   | : 1966 |
| Struthio_camelus           | : GG | GG | AA   | AT | AA   | AT | AA   | AT | AA   | AT | AA   | AT | AA   | : 1966 |
| Apteryx_haastii            | : GG | GG | AA   | AT | AA   | AT | AA   | AT | AA   | AT | AA   | AT | AA   | : 1966 |
| Rhea_american              | : GG | GG | AA   | AT | AA   | AT | AA   | AT | AA   | AT | AA   | AT | AA   | : 1966 |
| Gallus_gallus              | : GG | GG | AA   | AT | AA   | AT | AA   | AT | AA   | AT | AA   | AT | AA   | : 1960 |
| Ciconia_ciconia            | : GG | GG | AA   | AT | AA   | AT | AA   | AT | AA   | AT | AA   | AT | AA   | : 1966 |
| Ciconia_boyciana           | : GG | GG | AA   | AT | AA   | AT | AA   | AT | AA   | AT | AA   | AT | AA   | : 1966 |
| Iguana_iguana              | : GG | GG | AA   | AT | AA   | AT | AA   | AT | AA   | AT | AA   | AT | AA   | : 1963 |
| Eumeces_egregius           | : GG | GG | AA   | AT | AA   | AT | AA   | AT | AA   | AT | AA   | AT | AA   | : 1963 |
| Sphenodon_punctatus        | : GG | GG | AA   | AT | AA   | AT | AA   | AT | AA   | AT | AA   | AT | AA   | : 1960 |
| Sceloporus_occidentalis    | : GG | GG | AA   | AT | AA   | AT | AA   | AT | AA   | AT | AA   | AT | AA   | : 1963 |
| Cordylus_warreni           | : GG | GG | AA   | AT | AA   | AT | AA   | AT | AA   | AT | AA   | AT | AA   | : 1960 |
| Abronia_graminea           | : GG | GG | AA   | AT | AA   | AT | AA   | AT | AA   | AT | AA   | AT | AA   | : 1963 |
| Shinisaurus_crocodilurus   | : GG | GG | AA   | AT | AA   | AT | AA   | AT | AA   | AT | AA   | AT | AA   | : 1960 |
| Varanus_komodoensis        | : GG | GG | AA   | AT | AA   | AT | AA   | AT | AA   | AT | AA   | AT | AA   | : 1960 |
| Rhineura_floridana         | : GG | GG | AA   | AT | AA   | AT | AA   | AT | AA   | AT | AA   | AT | AA   | : 1960 |
| Geocalamus_acutus          | : GG | GG | AA   | AT | AA   | AT | AA   | AT | AA   | AT | AA   | AT | AA   | : 1954 |
| Diplometopon_zarudnyi      | : GG | GG | AA   | AT | AA   | AT | AA   | AT | AA   | AT | AA   | AT | AA   | : 1954 |
| Amphisbaena_schmidti       | : GG | GG | AA   | AT | AA   | AT | AA   | AT | AA   | AT | AA   | AT | AA   | : 1960 |
| Bipes_tridactylus          | : GG | GG | AA   | AT | AA   | AT | AA   | AT | AA   | AT | AA   | AT | AA   | : 1954 |
| Bipes_canaliculatus        | : GG | GG | AA   | AT | AA   | AT | AA   | AT | AA   | AT | AA   | AT | AA   | : 1954 |
| Bipes_biporus              | : GG | GG | AA   | AT | AA   | AT | AA   | AT | AA   | AT | AA   | AT | AA   | : 1954 |
| Anolis_carolinensis        | : GG | GG | AA   | AT | AA   | AT | AA   | AT | AA   | AT | AA   | AT | AA   | : 1962 |
| Ophisaurus_atnuatus        | : GG | GG | AA   | AT | AA   | AT | AA   | AT | AA   | AT | AA   | AT | AA   | : 1963 |
| Varanus_salvator           | : GG | GG | AA   | AT | AA   | AT | AA   | AT | AA   | AT | AA   | AT | AA   | : 1960 |
| Mertensiella_luschani      | : GG | GG | AA   | AT | AA   | AT | AA   | AT | AA   | AT | AA   | AT | AA   | : 1963 |
| Xenopus_laeviss            | : GG | GG | AA   | AT | AA   | AT | AA   | AT | AA   | AT | AA   | AT | AA   | : 1960 |



|                            | * | 2280    | *    | 2300 | *     | 2320 | *    | 2340 | *    | 2360  | *    | 2380  | *   |      |
|----------------------------|---|---------|------|------|-------|------|------|------|------|-------|------|-------|-----|------|
| Bos_taurus                 | : | AATATTG | TGGG | CAAA | TAAAC | TG   | CCCA | AAAC | CTTC | TAGGA | TATC | GGCAT | GC  | 2256 |
| Hylobates_lar              | : | TATATTG | TGGG | TAA  | CTAAC | CT   | CCCA | AAAC | CTTC | TGGCT | TATC | GGGAA | TAC | 2262 |
| Lemur_catta                | : | TATATTG | TGGG | TAA  | CTAAC | CT   | CCCA | AAAC | CTTC | TGGG  | TATC | GGGAA | TAC | 2262 |
| Nycticebus_coucang         | : | TATATTG | TGGG | TAA  | CTAAC | CT   | CCCA | AAAC | CTTC | TGGG  | TATC | GGGAA | TAC | 2259 |
| Tarsius_bancanus           | : | TATATTG | TGGG | TAA  | CTAAC | CT   | CCCA | AAAC | CTTC | TGGG  | TATC | GGGAA | TAC | 2259 |
| Gorilla_gorilla            | : | TATATTG | TGGG | TAA  | CTAAC | CT   | CCCA | AAAC | CTTC | TGGG  | TATC | GGGAA | TAC | 2262 |
| Homo_sapiens               | : | TATATTG | TGGG | TAA  | CTAAC | CT   | CCCA | AAAC | CTTC | TGGG  | TATC | GGGAA | TAC | 2262 |
| Papio_hamadryas            | : | TATATTG | TGGG | TAA  | CTAAC | CT   | CCCA | AAAC | CTTC | TGGG  | TATC | GGGAA | TAC | 2262 |
| Cebus_albifrons            | : | TATATTG | TGGG | TAA  | CTAAC | CT   | CCCA | AAAC | CTTC | TGGG  | TATC | GGGAA | TAC | 2256 |
| Macaca_sylvanus            | : | TATATTG | TGGG | TAA  | CTAAC | CT   | CCCA | AAAC | CTTC | TGGG  | TATC | GGGAA | TAC | 2256 |
| Pongo_pygmaeus             | : | TATATTG | TGGG | TAA  | CTAAC | CT   | CCCA | AAAC | CTTC | TGGG  | TATC | GGGAA | TAC | 2262 |
| Pan_paniscus               | : | TATATTG | TGGG | TAA  | CTAAC | CT   | CCCA | AAAC | CTTC | TGGG  | TATC | GGGAA | TAC | 2262 |
| Agkistrodon_piscivorus     | : | AATATTG | TGGG | TAA  | CTAAC | CT   | CCCA | AAAC | CTTC | TGGG  | TATC | GGGAA | TAC | 2220 |
| Pantherophis_guttatus      | : | TATATTG | TGGG | TAA  | CTAAC | CT   | CCCA | AAAC | CTTC | TGGG  | TATC | GGGAA | TAC | 2214 |
| Dinodon_semicarinatus      | : | TATATTG | TGGG | TAA  | CTAAC | CT   | CCCA | AAAC | CTTC | TGGG  | TATC | GGGAA | TAC | 2214 |
| Boa_constrictor            | : | TATATTG | TGGG | TAA  | CTAAC | CT   | CCCA | AAAC | CTTC | TGGG  | TATC | GGGAA | TAC | 2223 |
| Python_regius              | : | AATATTG | TGGG | TAA  | CTAAC | CT   | CCCA | AAAC | CTTC | TGGG  | TATC | GGGAA | TAC | 2223 |
| Acrochordus_granulatus     | : | AATATTG | TGGG | TAA  | CTAAC | CT   | CCCA | AAAC | CTTC | TGGG  | TATC | GGGAA | TAC | 2223 |
| Cylindrophis_ruffus        | : | AATATTG | TGGG | TAA  | CTAAC | CT   | CCCA | AAAC | CTTC | TGGG  | TATC | GGGAA | TAC | 2223 |
| Ovophis_okinavensis        | : | AATATTG | TGGG | TAA  | CTAAC | CT   | CCCA | AAAC | CTTC | TGGG  | TATC | GGGAA | TAC | 2220 |
| Xenopeltis_unicolor        | : | TATATTG | TGGG | TAA  | CTAAC | CT   | CCCA | AAAC | CTTC | TGGG  | TATC | GGGAA | TAC | 2226 |
| Typhlops_reticulatus       | : | AGCATTC | TGGG | TAA  | CTAAC | CT   | CCCA | AAAC | CTTC | TGGG  | TATC | GGGAA | TAC | 2217 |
| Leptotyphlops_dulcis       | : | TATATTG | TGGG | TAA  | CTAAC | CT   | CCCA | AAAC | CTTC | TGGG  | TATC | GGGAA | TAC | 2217 |
| Caiman_crocodilus          | : | TATATTG | TGGG | TAA  | CTAAC | CT   | CCCA | AAAC | CTTC | TGGG  | TATC | GGGAA | TAC | 2229 |
| Alligator_sinensis         | : | TATATTG | TGGG | TAA  | CTAAC | CT   | CCCA | AAAC | CTTC | TGGG  | TATC | GGGAA | TAC | 2244 |
| Alligator_mississippiensis | : | TATATTG | TGGG | TAA  | CTAAC | CT   | CCCA | AAAC | CTTC | TGGG  | TATC | GGGAA | TAC | 2214 |
| Gavialis_gangeticus        | : | TATATTG | TGGG | TAA  | CTAAC | CT   | CCCA | AAAC | CTTC | TGGG  | TATC | GGGAA | TAC | 2229 |
| Crocodylus_moreletii       | : | TATATTG | TGGG | TAA  | CTAAC | CT   | CCCA | AAAC | CTTC | TGGG  | TATC | GGGAA | TAC | 2229 |
| Dogania_subplana           | : | TATATTG | TGGG | TAA  | CTAAC | CT   | CCCA | AAAC | CTTC | TGGG  | TATC | GGGAA | TAC | 2223 |
| Pelomedusa_sabrufa         | : | TATATTG | TGGG | TAA  | CTAAC | CT   | CCCA | AAAC | CTTC | TGGG  | TATC | GGGAA | TAC | 2229 |
| Chrysemys_picta            | : | TATATTG | TGGG | TAA  | CTAAC | CT   | CCCA | AAAC | CTTC | TGGG  | TATC | GGGAA | TAC | 2247 |
| Chelonia_mydas             | : | TATATTG | TGGG | TAA  | CTAAC | CT   | CCCA | AAAC | CTTC | TGGG  | TATC | GGGAA | TAC | 2244 |
| Tinamus_major              | : | TATATTG | TGGG | TAA  | CTAAC | CT   | CCCA | AAAC | CTTC | TGGG  | TATC | GGGAA | TAC | 2229 |
| Smithornis_sharpei         | : | TATATTG | TGGG | TAA  | CTAAC | CT   | CCCA | AAAC | CTTC | TGGG  | TATC | GGGAA | TAC | 2229 |
| Corvus_frugilegus          | : | TATATTG | TGGG | TAA  | CTAAC | CT   | CCCA | AAAC | CTTC | TGGG  | TATC | GGGAA | TAC | 2229 |
| Vidua_chalybeata           | : | TATATTG | TGGG | TAA  | CTAAC | CT   | CCCA | AAAC | CTTC | TGGG  | TATC | GGGAA | TAC | 2229 |
| Buteo_buteo                | : | TATATTG | TGGG | TAA  | CTAAC | CT   | CCCA | AAAC | CTTC | TGGG  | TATC | GGGAA | TAC | 2229 |
| Falco_peregrinus           | : | TATATTG | TGGG | TAA  | CTAAC | CT   | CCCA | AAAC | CTTC | TGGG  | TATC | GGGAA | TAC | 2229 |
| Dromaius_novaeollandiae    | : | TATATTG | TGGG | TAA  | CTAAC | CT   | CCCA | AAAC | CTTC | TGGG  | TATC | GGGAA | TAC | 2229 |
| Struthio_camelus           | : | TATATTG | TGGG | TAA  | CTAAC | CT   | CCCA | AAAC | CTTC | TGGG  | TATC | GGGAA | TAC | 2229 |
| Apteryx_haastii            | : | TATATTG | TGGG | TAA  | CTAAC | CT   | CCCA | AAAC | CTTC | TGGG  | TATC | GGGAA | TAC | 2229 |
| Rhea_american              | : | TATATTG | TGGG | TAA  | CTAAC | CT   | CCCA | AAAC | CTTC | TGGG  | TATC | GGGAA | TAC | 2229 |
| Gallus_gallus              | : | TATATTG | TGGG | TAA  | CTAAC | CT   | CCCA | AAAC | CTTC | TGGG  | TATC | GGGAA | TAC | 2223 |
| Ciconia_ciconia            | : | TATATTG | TGGG | TAA  | CTAAC | CT   | CCCA | AAAC | CTTC | TGGG  | TATC | GGGAA | TAC | 2229 |
| Ciconia_boyciana           | : | TATATTG | TGGG | TAA  | CTAAC | CT   | CCCA | AAAC | CTTC | TGGG  | TATC | GGGAA | TAC | 2229 |
| Iguana_iguana              | : | TATATTG | TGGG | TAA  | CTAAC | CT   | CCCA | AAAC | CTTC | TGGG  | TATC | GGGAA | TAC | 2226 |
| Fumeces_egregius           | : | TATATTG | TGGG | TAA  | CTAAC | CT   | CCCA | AAAC | CTTC | TGGG  | TATC | GGGAA | TAC | 2226 |
| Sphenodon_punctatus        | : | TATATTG | TGGG | TAA  | CTAAC | CT   | CCCA | AAAC | CTTC | TGGG  | TATC | GGGAA | TAC | 2223 |
| Sceloporus_occidentalis    | : | TATATTG | TGGG | TAA  | CTAAC | CT   | CCCA | AAAC | CTTC | TGGG  | TATC | GGGAA | TAC | 2226 |
| Cordylus_warreni           | : | TATATTG | TGGG | TAA  | CTAAC | CT   | CCCA | AAAC | CTTC | TGGG  | TATC | GGGAA | TAC | 2223 |
| Abronia_graminea           | : | TATATTG | TGGG | TAA  | CTAAC | CT   | CCCA | AAAC | CTTC | TGGG  | TATC | GGGAA | TAC | 2226 |
| Shinisaurus_crocodilurus   | : | TATATTG | TGGG | TAA  | CTAAC | CT   | CCCA | AAAC | CTTC | TGGG  | TATC | GGGAA | TAC | 2223 |
| Varanus_komodoensis        | : | TATATTG | TGGG | TAA  | CTAAC | CT   | CCCA | AAAC | CTTC | TGGG  | TATC | GGGAA | TAC | 2223 |
| Rhineura_floridana         | : | TATATTG | TGGG | TAA  | CTAAC | CT   | CCCA | AAAC | CTTC | TGGG  | TATC | GGGAA | TAC | 2223 |
| Geocalamus_acutus          | : | TATATTG | TGGG | TAA  | CTAAC | CT   | CCCA | AAAC | CTTC | TGGG  | TATC | GGGAA | TAC | 2217 |
| Diplometopon_zarudnyi      | : | TATATTG | TGGG | TAA  | CTAAC | CT   | CCCA | AAAC | CTTC | TGGG  | TATC | GGGAA | TAC | 2217 |
| Amphisbaena_schmidti       | : | TATATTG | TGGG | TAA  | CTAAC | CT   | CCCA | AAAC | CTTC | TGGG  | TATC | GGGAA | TAC | 2223 |
| Bipes_tridactylus          | : | TATATTG | TGGG | TAA  | CTAAC | CT   | CCCA | AAAC | CTTC | TGGG  | TATC | GGGAA | TAC | 2217 |
| Bipes_canaliculatus        | : | TATATTG | TGGG | TAA  | CTAAC | CT   | CCCA | AAAC | CTTC | TGGG  | TATC | GGGAA | TAC | 2217 |
| Bipes_biporus              | : | TATATTG | TGGG | TAA  | CTAAC | CT   | CCCA | AAAC | CTTC | TGGG  | TATC | GGGAA | TAC | 2217 |
| Anolis_carolinensis        | : | TATATTG | TGGG | TAA  | CTAAC | CT   | CCCA | AAAC | CTTC | TGGG  | TATC | GGGAA | TAC | 2225 |
| Ophisaurus_atnuatus        | : | TATATTG | TGGG | TAA  | CTAAC | CT   | CCCA | AAAC | CTTC | TGGG  | TATC | GGGAA | TAC | 2226 |
| Varanus_salvator           | : | TATATTG | TGGG | TAA  | CTAAC | CT   | CCCA | AAAC | CTTC | TGGG  | TATC | GGGAA | TAC | 2223 |
| Mertensiella_luschani      | : | TATATTG | TGGG | TAA  | CTAAC | CT   | CCCA | AAAC | CTTC | TGGG  | TATC | GGGAA | TAC | 2226 |
| Xenopus_laevis             | : | TATATTG | TGGG | TAA  | CTAAC | CT   | CCCA | AAAC | CTTC | TGGG  | TATC | GGGAA | TAC | 2223 |

|                            | 2400 | * | 2420 | * | 2440 | * | 2460 | * | 2480 | * | 2500 | * | 2520 |        |
|----------------------------|------|---|------|---|------|---|------|---|------|---|------|---|------|--------|
| Bos_taurus                 | : C  | C | C    | C | C    | C | C    | C | C    | C | C    | C | C    | : 2389 |
| Hylobates_lar              | : C  | C | C    | C | C    | C | C    | C | C    | C | C    | C | C    | : 2395 |
| Lemur_catta                | : C  | C | C    | C | C    | C | C    | C | C    | C | C    | C | C    | : 2395 |
| Nycticebus_coucang         | : C  | C | C    | C | C    | C | C    | C | C    | C | C    | C | C    | : 2392 |
| Tarsius_bancanus           | : C  | C | C    | C | C    | C | C    | C | C    | C | C    | C | C    | : 2392 |
| Gorilla_gorilla            | : C  | C | C    | C | C    | C | C    | C | C    | C | C    | C | C    | : 2395 |
| Homo_sapiens               | : C  | C | C    | C | C    | C | C    | C | C    | C | C    | C | C    | : 2395 |
| Papio_hamadryas            | : C  | C | C    | C | C    | C | C    | C | C    | C | C    | C | C    | : 2395 |
| Cebus_albifrons            | : C  | C | C    | C | C    | C | C    | C | C    | C | C    | C | C    | : 2389 |
| Macaca_sylvanus            | : C  | C | C    | C | C    | C | C    | C | C    | C | C    | C | C    | : 2389 |
| Pongo_pygmaeus             | : C  | C | C    | C | C    | C | C    | C | C    | C | C    | C | C    | : 2395 |
| Pan_paniscus               | : C  | C | C    | C | C    | C | C    | C | C    | C | C    | C | C    | : 2395 |
| Agkistrodon_piscivorus     | : C  | C | C    | C | C    | C | C    | C | C    | C | C    | C | C    | : 2353 |
| Pantherophis_guttatus      | : C  | C | C    | C | C    | C | C    | C | C    | C | C    | C | C    | : 2347 |
| Dinodon_semicarinatus      | : C  | C | C    | C | C    | C | C    | C | C    | C | C    | C | C    | : 2347 |
| Boa_constrictor            | : C  | C | C    | C | C    | C | C    | C | C    | C | C    | C | C    | : 2356 |
| Python_regius              | : C  | C | C    | C | C    | C | C    | C | C    | C | C    | C | C    | : 2356 |
| Acrochordus_granulatus     | : C  | C | C    | C | C    | C | C    | C | C    | C | C    | C | C    | : 2356 |
| Chelone_mydas              | : C  | C | C    | C | C    | C | C    | C | C    | C | C    | C | C    | : 2356 |
| Ovophis_okinavensis        | : C  | C | C    | C | C    | C | C    | C | C    | C | C    | C | C    | : 2353 |
| Xenopeltis_unicolor        | : C  | C | C    | C | C    | C | C    | C | C    | C | C    | C | C    | : 2359 |
| Typhlops_reticulatus       | : C  | C | C    | C | C    | C | C    | C | C    | C | C    | C | C    | : 2350 |
| Leptotyphlops_dulcis       | : C  | C | C    | C | C    | C | C    | C | C    | C | C    | C | C    | : 2350 |
| Caiman_crocodylus          | : C  | C | C    | C | C    | C | C    | C | C    | C | C    | C | C    | : 2362 |
| Alligator_sinensis         | : C  | C | C    | C | C    | C | C    | C | C    | C | C    | C | C    | : 2377 |
| Alligator_mississippiensis | : C  | C | C    | C | C    | C | C    | C | C    | C | C    | C | C    | : 2347 |
| Gavialis_gangeticus        | : C  | C | C    | C | C    | C | C    | C | C    | C | C    | C | C    | : 2362 |
| Crocodylus_moreletii       | : C  | C | C    | C | C    | C | C    | C | C    | C | C    | C | C    | : 2362 |
| Dogania_subplana           | : C  | C | C    | C | C    | C | C    | C | C    | C | C    | C | C    | : 2356 |
| Pelomedusa_subrufa         | : C  | C | C    | C | C    | C | C    | C | C    | C | C    | C | C    | : 2362 |
| Chrysemys_picta            | : C  | C | C    | C | C    | C | C    | C | C    | C | C    | C | C    | : 2380 |
| Chelonia_mydas             | : C  | C | C    | C | C    | C | C    | C | C    | C | C    | C | C    | : 2377 |
| Tinanus_major              | : C  | C | C    | C | C    | C | C    | C | C    | C | C    | C | C    | : 2362 |
| Smithornis_sharpei         | : C  | C | C    | C | C    | C | C    | C | C    | C | C    | C | C    | : 2362 |
| Corvus_frugilegus          | : C  | C | C    | C | C    | C | C    | C | C    | C | C    | C | C    | : 2362 |
| Vidua_chalybeata           | : C  | C | C    | C | C    | C | C    | C | C    | C | C    | C | C    | : 2362 |
| Buteo_buteo                | : C  | C | C    | C | C    | C | C    | C | C    | C | C    | C | C    | : 2362 |
| Falco_peregrinus           | : C  | C | C    | C | C    | C | C    | C | C    | C | C    | C | C    | : 2362 |
| Dromaius_novaeollandiae    | : C  | C | C    | C | C    | C | C    | C | C    | C | C    | C | C    | : 2362 |
| Struthio_camelus           | : C  | C | C    | C | C    | C | C    | C | C    | C | C    | C | C    | : 2362 |
| Apteryx_haastii            | : C  | C | C    | C | C    | C | C    | C | C    | C | C    | C | C    | : 2362 |
| Rhea_americanana           | : C  | C | C    | C | C    | C | C    | C | C    | C | C    | C | C    | : 2362 |
| Gallus_gallus              | : C  | C | C    | C | C    | C | C    | C | C    | C | C    | C | C    | : 2356 |
| Ciconia_ciconia            | : C  | C | C    | C | C    | C | C    | C | C    | C | C    | C | C    | : 2362 |
| Ciconia_boyciiana          | : C  | C | C    | C | C    | C | C    | C | C    | C | C    | C | C    | : 2362 |
| Iguana_iguana              | : C  | C | C    | C | C    | C | C    | C | C    | C | C    | C | C    | : 2359 |
| Eumeces_egregius           | : C  | C | C    | C | C    | C | C    | C | C    | C | C    | C | C    | : 2359 |
| Sphenodon_punctatus        | : C  | C | C    | C | C    | C | C    | C | C    | C | C    | C | C    | : 2356 |
| Sceloporus_occidentalis    | : C  | C | C    | C | C    | C | C    | C | C    | C | C    | C | C    | : 2359 |
| Cordylus_warreni           | : C  | C | C    | C | C    | C | C    | C | C    | C | C    | C | C    | : 2356 |
| Abronia_graminea           | : C  | C | C    | C | C    | C | C    | C | C    | C | C    | C | C    | : 2359 |
| Shinisaurus_crocodylurus   | : C  | C | C    | C | C    | C | C    | C | C    | C | C    | C | C    | : 2356 |
| Varanus_komodoensis        | : C  | C | C    | C | C    | C | C    | C | C    | C | C    | C | C    | : 2356 |
| Rhineura_floridana         | : C  | C | C    | C | C    | C | C    | C | C    | C | C    | C | C    | : 2356 |
| Geocalamus_acutus          | : C  | C | C    | C | C    | C | C    | C | C    | C | C    | C | C    | : 2350 |
| Diplometopon_zarudnyi      | : C  | C | C    | C | C    | C | C    | C | C    | C | C    | C | C    | : 2350 |
| Amphisbaena_schmidti       | : C  | C | C    | C | C    | C | C    | C | C    | C | C    | C | C    | : 2356 |
| Bipes_tridactylus          | : C  | C | C    | C | C    | C | C    | C | C    | C | C    | C | C    | : 2350 |
| Bipes_canaliculatus        | : C  | C | C    | C | C    | C | C    | C | C    | C | C    | C | C    | : 2350 |
| Bipes_biporus              | : C  | C | C    | C | C    | C | C    | C | C    | C | C    | C | C    | : 2350 |
| Anolis_carolinensis        | : C  | C | C    | C | C    | C | C    | C | C    | C | C    | C | C    | : 2358 |
| Ophisaurus_attenuatus      | : C  | C | C    | C | C    | C | C    | C | C    | C | C    | C | C    | : 2359 |
| Varanus_salvator           | : C  | C | C    | C | C    | C | C    | C | C    | C | C    | C | C    | : 2356 |
| Mertensiella_luschani      | : C  | C | C    | C | C    | C | C    | C | C    | C | C    | C | C    | : 2359 |
| Xenopus_laevis             | : C  | C | C    | C | C    | C | C    | C | C    | C | C    | C | C    | : 2356 |









|                            |   |    |      |    |      |    |      |    |      |    |      |    |      |    |     |      |
|----------------------------|---|----|------|----|------|----|------|----|------|----|------|----|------|----|-----|------|
|                            |   | *  | 2940 | *  | 2960 | *  | 2980 | *  | 3000 | *  | 3020 | *  | 3040 | *  | 306 |      |
| Bos_taurus                 | : | AG | CT   | AG | CT   | AG | CT   | AG | CT   | AG | CT   | AG | CT   | AG | CT  | 2855 |
| Hylobates_lar              | : | AA | GT   | AG | CT   | AG | CT   | AG | CT   | AG | CT   | AG | CT   | AG | CT  | 2858 |
| Lemur_catta                | : | AA | GT   | AG | CT   | AG | CT   | AG | CT   | AG | CT   | AG | CT   | AG | CT  | 2858 |
| Nycticebus_coucang         | : | AA | GT   | AG | CT   | AG | CT   | AG | CT   | AG | CT   | AG | CT   | AG | CT  | 2855 |
| Tarsius_bancanus           | : | AG | CT   | AG | CT   | AG | CT   | AG | CT   | AG | CT   | AG | CT   | AG | CT  | 2855 |
| Gorilla_gorilla            | : | AA | GT   | AG | CT   | AG | CT   | AG | CT   | AG | CT   | AG | CT   | AG | CT  | 2858 |
| Homo_sapiens               | : | AA | GT   | AG | CT   | AG | CT   | AG | CT   | AG | CT   | AG | CT   | AG | CT  | 2858 |
| Papio_hamadryas            | : | AA | GT   | AG | CT   | AG | CT   | AG | CT   | AG | CT   | AG | CT   | AG | CT  | 2858 |
| Cebus_albifrons            | : | AA | GT   | AG | CT   | AG | CT   | AG | CT   | AG | CT   | AG | CT   | AG | CT  | 2858 |
| Macaca_sylvanus            | : | AA | GT   | AG | CT   | AG | CT   | AG | CT   | AG | CT   | AG | CT   | AG | CT  | 2855 |
| Pongo_pygmaeus             | : | AA | GT   | AG | CT   | AG | CT   | AG | CT   | AG | CT   | AG | CT   | AG | CT  | 2858 |
| Pan_paniscus               | : | AA | GT   | AG | CT   | AG | CT   | AG | CT   | AG | CT   | AG | CT   | AG | CT  | 2858 |
| Agkistrodon_piscivorus     | : | AA | GT   | AG | CT   | AG | CT   | AG | CT   | AG | CT   | AG | CT   | AG | CT  | 2879 |
| Pantherophis_guttatus      | : | AA | GT   | AG | CT   | AG | CT   | AG | CT   | AG | CT   | AG | CT   | AG | CT  | 2873 |
| Dinodon_semicarinatus      | : | AA | GT   | AG | CT   | AG | CT   | AG | CT   | AG | CT   | AG | CT   | AG | CT  | 2873 |
| Boa_constrictor            | : | AG | CT   | AG | CT   | AG | CT   | AG | CT   | AG | CT   | AG | CT   | AG | CT  | 2882 |
| Python_regius              | : | AA | GT   | AG | CT   | AG | CT   | AG | CT   | AG | CT   | AG | CT   | AG | CT  | 2882 |
| Acrochordus_granulatus     | : | AA | GT   | AG | CT   | AG | CT   | AG | CT   | AG | CT   | AG | CT   | AG | CT  | 2882 |
| Cylindrophis_ruffus        | : | AA | GT   | AG | CT   | AG | CT   | AG | CT   | AG | CT   | AG | CT   | AG | CT  | 2843 |
| Ovophis_okinavensis        | : | AA | GT   | AG | CT   | AG | CT   | AG | CT   | AG | CT   | AG | CT   | AG | CT  | 2879 |
| Xenopeltis_unicolor        | : | AA | GT   | AG | CT   | AG | CT   | AG | CT   | AG | CT   | AG | CT   | AG | CT  | 2885 |
| Typhlops_reticulatus       | : | AA | GT   | AG | CT   | AG | CT   | AG | CT   | AG | CT   | AG | CT   | AG | CT  | 2807 |
| Leptotyphlops_dulcis       | : | AA | GT   | AG | CT   | AG | CT   | AG | CT   | AG | CT   | AG | CT   | AG | CT  | 2823 |
| Caiman_crocodilus          | : | AA | GT   | AG | CT   | AG | CT   | AG | CT   | AG | CT   | AG | CT   | AG | CT  | 2855 |
| Alligator_sinensis         | : | AA | GT   | AG | CT   | AG | CT   | AG | CT   | AG | CT   | AG | CT   | AG | CT  | 2873 |
| Alligator_mississippiensis | : | AA | GT   | AG | CT   | AG | CT   | AG | CT   | AG | CT   | AG | CT   | AG | CT  | 2825 |
| Gavialis_gangeticus        | : | AA | GT   | AG | CT   | AG | CT   | AG | CT   | AG | CT   | AG | CT   | AG | CT  | 2852 |
| Crocodylus_moreletii       | : | AA | GT   | AG | CT   | AG | CT   | AG | CT   | AG | CT   | AG | CT   | AG | CT  | 2840 |
| Dogania_subplana           | : | AA | GT   | AG | CT   | AG | CT   | AG | CT   | AG | CT   | AG | CT   | AG | CT  | 2813 |
| Pelomedusa_subrufa         | : | AA | GT   | AG | CT   | AG | CT   | AG | CT   | AG | CT   | AG | CT   | AG | CT  | 2828 |
| Chrysemys_picta            | : | AA | GT   | AG | CT   | AG | CT   | AG | CT   | AG | CT   | AG | CT   | AG | CT  | 2849 |
| Chelonia_mydas             | : | AA | GT   | AG | CT   | AG | CT   | AG | CT   | AG | CT   | AG | CT   | AG | CT  | 2846 |
| Tinamus_major              | : | AA | GT   | AG | CT   | AG | CT   | AG | CT   | AG | CT   | AG | CT   | AG | CT  | 2828 |
| Smithornis_sharpei         | : | AA | GT   | AG | CT   | AG | CT   | AG | CT   | AG | CT   | AG | CT   | AG | CT  | 2828 |
| Corvus_frugilegus          | : | AA | GT   | AG | CT   | AG | CT   | AG | CT   | AG | CT   | AG | CT   | AG | CT  | 2828 |
| Vidua_chalybeata           | : | AA | GT   | AG | CT   | AG | CT   | AG | CT   | AG | CT   | AG | CT   | AG | CT  | 2828 |
| Buteo_buteo                | : | AA | GT   | AG | CT   | AG | CT   | AG | CT   | AG | CT   | AG | CT   | AG | CT  | 2828 |
| Falco_peregrinus           | : | AA | GT   | AG | CT   | AG | CT   | AG | CT   | AG | CT   | AG | CT   | AG | CT  | 2828 |
| Dromaius_novaeollandiae    | : | AA | GT   | AG | CT   | AG | CT   | AG | CT   | AG | CT   | AG | CT   | AG | CT  | 2828 |
| Struthio_camelus           | : | AA | GT   | AG | CT   | AG | CT   | AG | CT   | AG | CT   | AG | CT   | AG | CT  | 2828 |
| Apteryx_haastii            | : | AA | GT   | AG | CT   | AG | CT   | AG | CT   | AG | CT   | AG | CT   | AG | CT  | 2828 |
| Rhea_americanana           | : | AA | GT   | AG | CT   | AG | CT   | AG | CT   | AG | CT   | AG | CT   | AG | CT  | 2828 |
| Gallus_gallus              | : | AA | GT   | AG | CT   | AG | CT   | AG | CT   | AG | CT   | AG | CT   | AG | CT  | 2822 |
| Ciconia_ciconia            | : | AA | GT   | AG | CT   | AG | CT   | AG | CT   | AG | CT   | AG | CT   | AG | CT  | 2828 |
| Ciconia_boycinana          | : | AA | GT   | AG | CT   | AG | CT   | AG | CT   | AG | CT   | AG | CT   | AG | CT  | 2828 |
| Iguana_iguana              | : | AA | GT   | AG | CT   | AG | CT   | AG | CT   | AG | CT   | AG | CT   | AG | CT  | 2828 |
| Fumeces_egregius           | : | AA | GT   | AG | CT   | AG | CT   | AG | CT   | AG | CT   | AG | CT   | AG | CT  | 2828 |
| Sphenodon_punctatus        | : | AA | GT   | AG | CT   | AG | CT   | AG | CT   | AG | CT   | AG | CT   | AG | CT  | 2828 |
| Sceloporus_occidentalis    | : | AA | GT   | AG | CT   | AG | CT   | AG | CT   | AG | CT   | AG | CT   | AG | CT  | 2828 |
| Cordylus_warreni           | : | AA | GT   | AG | CT   | AG | CT   | AG | CT   | AG | CT   | AG | CT   | AG | CT  | 2837 |
| Abronia_graminea           | : | AA | GT   | AG | CT   | AG | CT   | AG | CT   | AG | CT   | AG | CT   | AG | CT  | 2828 |
| Shinisaurus_crocodilurus   | : | AA | GT   | AG | CT   | AG | CT   | AG | CT   | AG | CT   | AG | CT   | AG | CT  | 2828 |
| Varanus_komodoensis        | : | AA | GT   | AG | CT   | AG | CT   | AG | CT   | AG | CT   | AG | CT   | AG | CT  | 2879 |
| Rhineura_floridana         | : | AA | GT   | AG | CT   | AG | CT   | AG | CT   | AG | CT   | AG | CT   | AG | CT  | 2825 |
| Geocalamus_acutus          | : | AA | GT   | AG | CT   | AG | CT   | AG | CT   | AG | CT   | AG | CT   | AG | CT  | 2807 |
| Diplometopon_zarudnyi      | : | AA | GT   | AG | CT   | AG | CT   | AG | CT   | AG | CT   | AG | CT   | AG | CT  | 2807 |
| Amphisbaena_schmidti       | : | AA | GT   | AG | CT   | AG | CT   | AG | CT   | AG | CT   | AG | CT   | AG | CT  | 2813 |
| Bipes_tridactylus          | : | AA | GT   | AG | CT   | AG | CT   | AG | CT   | AG | CT   | AG | CT   | AG | CT  | 2807 |
| Bipes_canaliculatus        | : | AA | GT   | AG | CT   | AG | CT   | AG | CT   | AG | CT   | AG | CT   | AG | CT  | 2807 |
| Bipes_biporus              | : | AA | GT   | AG | CT   | AG | CT   | AG | CT   | AG | CT   | AG | CT   | AG | CT  | 2807 |
| Anolis_carolinensis        | : | AA | GT   | AG | CT   | AG | CT   | AG | CT   | AG | CT   | AG | CT   | AG | CT  | 2824 |
| Ophisaurus_atnuatus        | : | AA | GT   | AG | CT   | AG | CT   | AG | CT   | AG | CT   | AG | CT   | AG | CT  | 2825 |
| Varanus_salvator           | : | AA | GT   | AG | CT   | AG | CT   | AG | CT   | AG | CT   | AG | CT   | AG | CT  | 2876 |
| Mertensiella_luschani      | : | AG | CT   | AG | CT   | AG | CT   | AG | CT   | AG | CT   | AG | CT   | AG | CT  | 2840 |
| Xenopus_laevis             | : | AA | GT   | AG | CT   | AG | CT   | AG | CT   | AG | CT   | AG | CT   | AG | CT  | 2834 |



0 \* 3080 \* 3100 \* 3120 \* 3140 \* 3160 \* 3180 \*

Bos\_taurus : AGNAATACAAACCGAATCTTAGTACCCAGNAGAGTACTACACGAGCGTGTGCCCTTATAGGCCTAAAAACAGAGCCAAACCCAGGCCTTAAACCCAAACAAACCCGATATAGCCCGTCCAGGC : 2988  
 Hylobates\_lar : TGAAGCCCCGTCCTTAATAAATACACACAGAGAGCTTACACACAGAGCGTGTCCCCCTCTGGGCTAAAAACAGAGCCAAACCCAGGCCTTAAACCCAAACAAACCCGATATAGCCCGTCCAGGC : 2991  
 Lemur\_catta : AGNAATACAAACCGAATCTTAGTACCCAGNAGAGTACTACACGAGCGTGTGCCCTTATAGGCCTAAAAACAGAGCCAAACCCAGGCCTTAAACCCAAACAAACCCGATATAGCCCGTCCAGGC : 2991  
 Nycticebus\_coucang : AGGATACAAACCGAATCTTAGTACCCAGNAGAGTACTACACGAGCGTGTGCCCTTATAGGCCTAAAAACAGAGCCAAACCCAGGCCTTAAACCCAAACAAACCCGATATAGCCCGTCCAGGC : 2988  
 Tarsius\_bancanus : AGNAATACAAACCGAATCTTAGTACCCAGNAGAGTACTACACGAGCGTGTGCCCTTATAGGCCTAAAAACAGAGCCAAACCCAGGCCTTAAACCCAAACAAACCCGATATAGCCCGTCCAGGC : 2988  
 Gorilla\_gorilla : TGAAGCCCCGTCCTTAATAAATACACACAGAGAGTACTACACGAGCGTGTCCCCGATTAGGCCTAAAAACAGAGCCAAACCCAGGCCTTAAACCCAAACAAACCCGATATAGCCCGTCCAGGC : 2991  
 Homo\_sapiens : TGAAGCCCCGTCCTTAATAAATACACACAGAGAGTACTACACGAGCGTGTCCCCGATTAGGCCTAAAAACAGAGCCAAACCCAGGCCTTAAACCCAAACAAACCCGATATAGCCCGTCCAGGC : 2991  
 Papio\_hamadryas : TGAAGCCCCGTCCTTAATAAATACACACAGAGAGTACTACACGAGCGTGTCCCCGATTAGGCCTAAAAACAGAGCCAAACCCAGGCCTTAAACCCAAACAAACCCGATATAGCCCGTCCAGGC : 2991  
 Cebus\_albifrons : AGNAGCGAATCTTAGTACCCAGNAGAGTACTACACGAGCGTGTGCCCTTATAGGCCTAAAAACAGAGCCAAACCCAGGCCTTAAACCCAAACAAACCCGATATAGCCCGTCCAGGC : 2991  
 Macaca\_sylvanus : TGAAGCCCCGTCCTTAATAAATACACACAGAGAGTACTACACGAGCGTGTCCCCGATTAGGCCTAAAAACAGAGCCAAACCCAGGCCTTAAACCCAAACAAACCCGATATAGCCCGTCCAGGC : 2988  
 Pongo\_pygmaeus : TGAAGCCCCGTCCTTAATAAATACACACAGAGAGTACTACACGAGCGTGTCCCCGATTAGGCCTAAAAACAGAGCCAAACCCAGGCCTTAAACCCAAACAAACCCGATATAGCCCGTCCAGGC : 2991  
 Pan\_paniscus : TGAAGCCCCGTCCTTAATAAATACACACAGAGAGTACTACACGAGCGTGTCCCCGATTAGGCCTAAAAACAGAGCCAAACCCAGGCCTTAAACCCAAACAAACCCGATATAGCCCGTCCAGGC : 2991  
 Agkistrodon\_piscivorus : AGGATACAAACCGAATCTTAGTACCCAGNAGAGTACTACACGAGCGTGTGCCCTTATAGGCCTAAAAACAGAGCCAAACCCAGGCCTTAAACCCAAACAAACCCGATATAGCCCGTCCAGGC : 3012  
 Pantherophis\_guttatus : AGGCTACAAACCGAATCTTAGTACCCAGNAGAGTACTACACGAGCGTGTGCCCTTATAGGCCTAAAAACAGAGCCAAACCCAGGCCTTAAACCCAAACAAACCCGATATAGCCCGTCCAGGC : 3006  
 Dinodon\_semicarinatus : GGGCTACAAACCGAATCTTAGTACCCAGNAGAGTACTACACGAGCGTGTGCCCTTATAGGCCTAAAAACAGAGCCAAACCCAGGCCTTAAACCCAAACAAACCCGATATAGCCCGTCCAGGC : 3006  
 Boa\_constrictor : GAACTACAAACCGAATCTTAGTACCCAGNAGAGTACTACACGAGCGTGTGCCCTTATAGGCCTAAAAACAGAGCCAAACCCAGGCCTTAAACCCAAACAAACCCGATATAGCCCGTCCAGGC : 3015  
 Python\_regius : GAACTACAAACCGAATCTTAGTACCCAGNAGAGTACTACACGAGCGTGTGCCCTTATAGGCCTAAAAACAGAGCCAAACCCAGGCCTTAAACCCAAACAAACCCGATATAGCCCGTCCAGGC : 3015  
 Acrochordus\_granulatus : TCCCTACAAACCGAATCTTAGTACCCAGNAGAGTACTACACGAGCGTGTGCCCTTATAGGCCTAAAAACAGAGCCAAACCCAGGCCTTAAACCCAAACAAACCCGATATAGCCCGTCCAGGC : 3015  
 Cylindrophis\_ruffus : GAACTACAAACCGAATCTTAGTACCCAGNAGAGTACTACACGAGCGTGTGCCCTTATAGGCCTAAAAACAGAGCCAAACCCAGGCCTTAAACCCAAACAAACCCGATATAGCCCGTCCAGGC : 2976  
 Orophis\_okinavensis : AGGCTACAAACCGAATCTTAGTACCCAGNAGAGTACTACACGAGCGTGTGCCCTTATAGGCCTAAAAACAGAGCCAAACCCAGGCCTTAAACCCAAACAAACCCGATATAGCCCGTCCAGGC : 3012  
 Xenopeltis\_unicolor : GAACTACAAACCGAATCTTAGTACCCAGNAGAGTACTACACGAGCGTGTGCCCTTATAGGCCTAAAAACAGAGCCAAACCCAGGCCTTAAACCCAAACAAACCCGATATAGCCCGTCCAGGC : 3018  
 Thylops\_reticulatus : AGGCTACAAACCGAATCTTAGTACCCAGNAGAGTACTACACGAGCGTGTGCCCTTATAGGCCTAAAAACAGAGCCAAACCCAGGCCTTAAACCCAAACAAACCCGATATAGCCCGTCCAGGC : 2940  
 Leptotyphlops\_dulcis : GGGCTACAAACCGAATCTTAGTACCCAGNAGAGTACTACACGAGCGTGTGCCCTTATAGGCCTAAAAACAGAGCCAAACCCAGGCCTTAAACCCAAACAAACCCGATATAGCCCGTCCAGGC : 2956  
 Caiman\_crocodilus : AAATACAAACCGAATCTTAGTACCCAGNAGAGTACTACACGAGCGTGTGCCCTTATAGGCCTAAAAACAGAGCCAAACCCAGGCCTTAAACCCAAACAAACCCGATATAGCCCGTCCAGGC : 2988  
 Alligator\_sinensis : AAATACAAACCGAATCTTAGTACCCAGNAGAGTACTACACGAGCGTGTGCCCTTATAGGCCTAAAAACAGAGCCAAACCCAGGCCTTAAACCCAAACAAACCCGATATAGCCCGTCCAGGC : 3006  
 Alligator\_mississippiensis : AAATACAAACCGAATCTTAGTACCCAGNAGAGTACTACACGAGCGTGTGCCCTTATAGGCCTAAAAACAGAGCCAAACCCAGGCCTTAAACCCAAACAAACCCGATATAGCCCGTCCAGGC : 2958  
 Gavialis\_gangeticus : AGGCTACAAACCGAATCTTAGTACCCAGNAGAGTACTACACGAGCGTGTGCCCTTATAGGCCTAAAAACAGAGCCAAACCCAGGCCTTAAACCCAAACAAACCCGATATAGCCCGTCCAGGC : 2985  
 Crocodylus\_moreletii : AAATACAAACCGAATCTTAGTACCCAGNAGAGTACTACACGAGCGTGTGCCCTTATAGGCCTAAAAACAGAGCCAAACCCAGGCCTTAAACCCAAACAAACCCGATATAGCCCGTCCAGGC : 2973  
 Dogania\_subplana : AGNATACAAACCGAATCTTAGTACCCAGNAGAGTACTACACGAGCGTGTGCCCTTATAGGCCTAAAAACAGAGCCAAACCCAGGCCTTAAACCCAAACAAACCCGATATAGCCCGTCCAGGC : 2946  
 Pelomedusa\_subrufa : AGNATACAAACCGAATCTTAGTACCCAGNAGAGTACTACACGAGCGTGTGCCCTTATAGGCCTAAAAACAGAGCCAAACCCAGGCCTTAAACCCAAACAAACCCGATATAGCCCGTCCAGGC : 2961  
 Chelysemys\_picta : AGNATACAAACCGAATCTTAGTACCCAGNAGAGTACTACACGAGCGTGTGCCCTTATAGGCCTAAAAACAGAGCCAAACCCAGGCCTTAAACCCAAACAAACCCGATATAGCCCGTCCAGGC : 2982  
 Chelonia\_mydas : AGNATACAAACCGAATCTTAGTACCCAGNAGAGTACTACACGAGCGTGTGCCCTTATAGGCCTAAAAACAGAGCCAAACCCAGGCCTTAAACCCAAACAAACCCGATATAGCCCGTCCAGGC : 2979  
 Tinamus\_major : AGNATACAAACCGAATCTTAGTACCCAGNAGAGTACTACACGAGCGTGTGCCCTTATAGGCCTAAAAACAGAGCCAAACCCAGGCCTTAAACCCAAACAAACCCGATATAGCCCGTCCAGGC : 2961  
 Smithornis\_sharpei : AGNATACAAACCGAATCTTAGTACCCAGNAGAGTACTACACGAGCGTGTGCCCTTATAGGCCTAAAAACAGAGCCAAACCCAGGCCTTAAACCCAAACAAACCCGATATAGCCCGTCCAGGC : 2961  
 Corvus\_frugilegus : AGNATACAAACCGAATCTTAGTACCCAGNAGAGTACTACACGAGCGTGTGCCCTTATAGGCCTAAAAACAGAGCCAAACCCAGGCCTTAAACCCAAACAAACCCGATATAGCCCGTCCAGGC : 2961  
 Vidua\_chalybeata : AGGCTACAAACCGAATCTTAGTACCCAGNAGAGTACTACACGAGCGTGTGCCCTTATAGGCCTAAAAACAGAGCCAAACCCAGGCCTTAAACCCAAACAAACCCGATATAGCCCGTCCAGGC : 2961  
 Buteo\_buteo : AGGCTACAAACCGAATCTTAGTACCCAGNAGAGTACTACACGAGCGTGTGCCCTTATAGGCCTAAAAACAGAGCCAAACCCAGGCCTTAAACCCAAACAAACCCGATATAGCCCGTCCAGGC : 2961  
 Falco\_peregrinus : GGAATACAAACCGAATCTTAGTACCCAGNAGAGTACTACACGAGCGTGTGCCCTTATAGGCCTAAAAACAGAGCCAAACCCAGGCCTTAAACCCAAACAAACCCGATATAGCCCGTCCAGGC : 2961  
 Dromaius\_novaeollandiae : AGAATACAAACCGAATCTTAGTACCCAGNAGAGTACTACACGAGCGTGTGCCCTTATAGGCCTAAAAACAGAGCCAAACCCAGGCCTTAAACCCAAACAAACCCGATATAGCCCGTCCAGGC : 2961  
 Struthio\_camelus : GGAATACAAACCGAATCTTAGTACCCAGNAGAGTACTACACGAGCGTGTGCCCTTATAGGCCTAAAAACAGAGCCAAACCCAGGCCTTAAACCCAAACAAACCCGATATAGCCCGTCCAGGC : 2961  
 Apteryx\_haastii : GGAATACAAACCGAATCTTAGTACCCAGNAGAGTACTACACGAGCGTGTGCCCTTATAGGCCTAAAAACAGAGCCAAACCCAGGCCTTAAACCCAAACAAACCCGATATAGCCCGTCCAGGC : 2961  
 Rhea\_americanana : AGAATACAAACCGAATCTTAGTACCCAGNAGAGTACTACACGAGCGTGTGCCCTTATAGGCCTAAAAACAGAGCCAAACCCAGGCCTTAAACCCAAACAAACCCGATATAGCCCGTCCAGGC : 2961  
 Gallus\_gallus : AGAATACAAACCGAATCTTAGTACCCAGNAGAGTACTACACGAGCGTGTGCCCTTATAGGCCTAAAAACAGAGCCAAACCCAGGCCTTAAACCCAAACAAACCCGATATAGCCCGTCCAGGC : 2955  
 Ciconia\_ciconia : AGAATACAAACCGAATCTTAGTACCCAGNAGAGTACTACACGAGCGTGTGCCCTTATAGGCCTAAAAACAGAGCCAAACCCAGGCCTTAAACCCAAACAAACCCGATATAGCCCGTCCAGGC : 2961  
 Ciconia\_boyciana : AGAATACAAACCGAATCTTAGTACCCAGNAGAGTACTACACGAGCGTGTGCCCTTATAGGCCTAAAAACAGAGCCAAACCCAGGCCTTAAACCCAAACAAACCCGATATAGCCCGTCCAGGC : 2961  
 Iguana\_iguana : AGAATACAAACCGAATCTTAGTACCCAGNAGAGTACTACACGAGCGTGTGCCCTTATAGGCCTAAAAACAGAGCCAAACCCAGGCCTTAAACCCAAACAAACCCGATATAGCCCGTCCAGGC : 2961  
 Eumeces\_egregius : AGAATACAAACCGAATCTTAGTACCCAGNAGAGTACTACACGAGCGTGTGCCCTTATAGGCCTAAAAACAGAGCCAAACCCAGGCCTTAAACCCAAACAAACCCGATATAGCCCGTCCAGGC : 2961  
 Sphenodon\_punctatus : AAATACAAACCGAATCTTAGTACCCAGNAGAGTACTACACGAGCGTGTGCCCTTATAGGCCTAAAAACAGAGCCAAACCCAGGCCTTAAACCCAAACAAACCCGATATAGCCCGTCCAGGC : 2961  
 Sceloporus\_occidentalis : AGAATACAAACCGAATCTTAGTACCCAGNAGAGTACTACACGAGCGTGTGCCCTTATAGGCCTAAAAACAGAGCCAAACCCAGGCCTTAAACCCAAACAAACCCGATATAGCCCGTCCAGGC : 2961  
 Cordylus\_warreni : AGGCTACAAACCGAATCTTAGTACCCAGNAGAGTACTACACGAGCGTGTGCCCTTATAGGCCTAAAAACAGAGCCAAACCCAGGCCTTAAACCCAAACAAACCCGATATAGCCCGTCCAGGC : 2970  
 Abronia\_graminea : AGAATACAAACCGAATCTTAGTACCCAGNAGAGTACTACACGAGCGTGTGCCCTTATAGGCCTAAAAACAGAGCCAAACCCAGGCCTTAAACCCAAACAAACCCGATATAGCCCGTCCAGGC : 2961  
 Shinisaurus\_crocodilurus : AGAATACAAACCGAATCTTAGTACCCAGNAGAGTACTACACGAGCGTGTGCCCTTATAGGCCTAAAAACAGAGCCAAACCCAGGCCTTAAACCCAAACAAACCCGATATAGCCCGTCCAGGC : 2961  
 Varanus\_komodoensis : AGAATACAAACCGAATCTTAGTACCCAGNAGAGTACTACACGAGCGTGTGCCCTTATAGGCCTAAAAACAGAGCCAAACCCAGGCCTTAAACCCAAACAAACCCGATATAGCCCGTCCAGGC : 3012  
 Rhineura\_floridana : GGAATACAAACCGAATCTTAGTACCCAGNAGAGTACTACACGAGCGTGTGCCCTTATAGGCCTAAAAACAGAGCCAAACCCAGGCCTTAAACCCAAACAAACCCGATATAGCCCGTCCAGGC : 2958  
 Geocalamus\_acutus : TGGCTACAAACCGAATCTTAGTACCCAGNAGAGTACTACACGAGCGTGTGCCCTTATAGGCCTAAAAACAGAGCCAAACCCAGGCCTTAAACCCAAACAAACCCGATATAGCCCGTCCAGGC : 2940  
 Diplometopon\_zarudnyi : AAATACAAACCGAATCTTAGTACCCAGNAGAGTACTACACGAGCGTGTGCCCTTATAGGCCTAAAAACAGAGCCAAACCCAGGCCTTAAACCCAAACAAACCCGATATAGCCCGTCCAGGC : 2940  
 Amphisbaena\_schmidti : AAATACAAACCGAATCTTAGTACCCAGNAGAGTACTACACGAGCGTGTGCCCTTATAGGCCTAAAAACAGAGCCAAACCCAGGCCTTAAACCCAAACAAACCCGATATAGCCCGTCCAGGC : 2946  
 Bipes\_tridactylus : AGAATACAAACCGAATCTTAGTACCCAGNAGAGTACTACACGAGCGTGTGCCCTTATAGGCCTAAAAACAGAGCCAAACCCAGGCCTTAAACCCAAACAAACCCGATATAGCCCGTCCAGGC : 2940  
 Bipes\_canaliculatus : AGAATACAAACCGAATCTTAGTACCCAGNAGAGTACTACACGAGCGTGTGCCCTTATAGGCCTAAAAACAGAGCCAAACCCAGGCCTTAAACCCAAACAAACCCGATATAGCCCGTCCAGGC : 2940  
 Bipes\_biporus : AGAATACAAACCGAATCTTAGTACCCAGNAGAGTACTACACGAGCGTGTGCCCTTATAGGCCTAAAAACAGAGCCAAACCCAGGCCTTAAACCCAAACAAACCCGATATAGCCCGTCCAGGC : 2940  
 Anolis\_carolinensis : AGGCTACAAACCGAATCTTAGTACCCAGNAGAGTACTACACGAGCGTGTGCCCTTATAGGCCTAAAAACAGAGCCAAACCCAGGCCTTAAACCCAAACAAACCCGATATAGCCCGTCCAGGC : 2956  
 Ophisaurus\_atnuatus : AGGCTACAAACCGAATCTTAGTACCCAGNAGAGTACTACACGAGCGTGTGCCCTTATAGGCCTAAAAACAGAGCCAAACCCAGGCCTTAAACCCAAACAAACCCGATATAGCCCGTCCAGGC : 2958  
 Varanus\_salvator : AGGCTACAAACCGAATCTTAGTACCCAGNAGAGTACTACACGAGCGTGTGCCCTTATAGGCCTAAAAACAGAGCCAAACCCAGGCCTTAAACCCAAACAAACCCGATATAGCCCGTCCAGGC : 3009  
 Mertensiella\_luschani : AGAATACAAACCGAATCTTAGTACCCAGNAGAGTACTACACGAGCGTGTGCCCTTATAGGCCTAAAAACAGAGCCAAACCCAGGCCTTAAACCCAAACAAACCCGATATAGCCCGTCCAGGC : 2973  
 Xenopus\_laevis : AGAATACAAACCGAATCTTAGTACCCAGNAGAGTACTACACGAGCGTGTGCCCTTATAGGCCTAAAAACAGAGCCAAACCCAGGCCTTAAACCCAAACAAACCCGATATAGCCCGTCCAGGC : 2967

|                            | 3200                                                                                                   | * | 3220 | * | 3240 | * | 3260 | * | 3280 | * | 3300 | * | 3320 |        |
|----------------------------|--------------------------------------------------------------------------------------------------------|---|------|---|------|---|------|---|------|---|------|---|------|--------|
| Bos_taurus                 | : GATATACGGGCAATGCTCAGAAATCGGGGCAAAACCAACNGTTATACCAATGCTGAGGAGAGCCCACTAAAGACCTTGAAAAAGATGCGCCAAATATA   |   |      |   |      |   |      |   |      |   |      |   |      | : 3099 |
| Hylobates_lar              | : GATATACGGGCAATGCTCAGAAATCGGGGCAAAACCAACNGTTATACCAATGCTGAGGAGAGCCCACTAAAGACCTTGAAAAAGATGCGCCAAATATA   |   |      |   |      |   |      |   |      |   |      |   |      | : 3102 |
| Lemur_catta                | : GTTTATACGGGCAATGCTCAGAAATCGGGGCAAAACCAACNGTTATACCAATGCTGAGGAGAGCCCACTAAAGACCTTGAAAAAGATGCGCCAAATATA  |   |      |   |      |   |      |   |      |   |      |   |      | : 3102 |
| Nycticebus_coucang         | : ATTTATACGGGCAATGCTCAGAAATCGGGGCAAAACCAACNGTTATACCAATGCTGAGGAGAGCCCACTAAAGACCTTGAAAAAGATGCGCCAAATATA  |   |      |   |      |   |      |   |      |   |      |   |      | : 3099 |
| Tarsius_bancanus           | : GTTTATACGGGCAATGCTCAGAAATCGGGGCAAAACCAACNGTTATACCAATGCTGAGGAGAGCCCACTAAAGACCTTGAAAAAGATGCGCCAAATATA  |   |      |   |      |   |      |   |      |   |      |   |      | : 3099 |
| Gorilla_gorilla            | : GATATACGGGCAATGCTCAGAAATCGGGGCAAAACCAACNGTTATACCAATGCTGAGGAGAGCCCACTAAAGACCTTGAAAAAGATGCGCCAAATATA   |   |      |   |      |   |      |   |      |   |      |   |      | : 3102 |
| Homo_sapiens               | : GATATACGGGCAATGCTCAGAAATCGGGGCAAAACCAACNGTTATACCAATGCTGAGGAGAGCCCACTAAAGACCTTGAAAAAGATGCGCCAAATATA   |   |      |   |      |   |      |   |      |   |      |   |      | : 3102 |
| Papio_hamadryas            | : GATATACGGGCAATGCTCAGAAATCGGGGCAAAACCAACNGTTATACCAATGCTGAGGAGAGCCCACTAAAGACCTTGAAAAAGATGCGCCAAATATA   |   |      |   |      |   |      |   |      |   |      |   |      | : 3102 |
| Cebus_albifrons            | : GATTTACGGGCAATGCTCAGAAATCGGGGCAAAACCAACNGTTATACCAATGCTGAGGAGAGCCCACTAAAGACCTTGAAAAAGATGCGCCAAATATA   |   |      |   |      |   |      |   |      |   |      |   |      | : 3108 |
| Macaca_sylvanus            | : GATTTACGGGCAATGCTCAGAAATCGGGGCAAAACCAACNGTTATACCAATGCTGAGGAGAGCCCACTAAAGACCTTGAAAAAGATGCGCCAAATATA   |   |      |   |      |   |      |   |      |   |      |   |      | : 3099 |
| Pongo_pygmaeus             | : GATTTACGGGCAATGCTCAGAAATCGGGGCAAAACCAACNGTTATACCAATGCTGAGGAGAGCCCACTAAAGACCTTGAAAAAGATGCGCCAAATATA   |   |      |   |      |   |      |   |      |   |      |   |      | : 3102 |
| Pan_paniscus               | : GATTTACGGGCAATGCTCAGAAATCGGGGCAAAACCAACNGTTATACCAATGCTGAGGAGAGCCCACTAAAGACCTTGAAAAAGATGCGCCAAATATA   |   |      |   |      |   |      |   |      |   |      |   |      | : 3102 |
| Agkistrodon_piscivorus     | : GATTTTACGGGCAATGCTCAGAAATCGGGGCAAAACCAACNGTTATACCAATGCTGAGGAGAGCCCACTAAAGACCTTGAAAAAGATGCGCCAAATATA  |   |      |   |      |   |      |   |      |   |      |   |      | : 3123 |
| Pantherophis_guttatus      | : GATTTTACGGGCAATGCTCAGAAATCGGGGCAAAACCAACNGTTATACCAATGCTGAGGAGAGCCCACTAAAGACCTTGAAAAAGATGCGCCAAATATA  |   |      |   |      |   |      |   |      |   |      |   |      | : 3117 |
| Dinodon_semicarinatus      | : GATTTTACGGGCAATGCTCAGAAATCGGGGCAAAACCAACNGTTATACCAATGCTGAGGAGAGCCCACTAAAGACCTTGAAAAAGATGCGCCAAATATA  |   |      |   |      |   |      |   |      |   |      |   |      | : 3117 |
| Boa_constrictor            | : GATTTTACGGGCAATGCTCAGAAATCGGGGCAAAACCAACNGTTATACCAATGCTGAGGAGAGCCCACTAAAGACCTTGAAAAAGATGCGCCAAATATA  |   |      |   |      |   |      |   |      |   |      |   |      | : 3126 |
| Python_regius              | : GATTTTACGGGCAATGCTCAGAAATCGGGGCAAAACCAACNGTTATACCAATGCTGAGGAGAGCCCACTAAAGACCTTGAAAAAGATGCGCCAAATATA  |   |      |   |      |   |      |   |      |   |      |   |      | : 3129 |
| Acrochordus_granulatus     | : GATTTTACGGGCAATGCTCAGAAATCGGGGCAAAACCAACNGTTATACCAATGCTGAGGAGAGCCCACTAAAGACCTTGAAAAAGATGCGCCAAATATA  |   |      |   |      |   |      |   |      |   |      |   |      | : 3126 |
| Cylindrophis_ruffus        | : GATTTTACGGGCAATGCTCAGAAATCGGGGCAAAACCAACNGTTATACCAATGCTGAGGAGAGCCCACTAAAGACCTTGAAAAAGATGCGCCAAATATA  |   |      |   |      |   |      |   |      |   |      |   |      | : 3087 |
| Ovophis_okinavensis        | : GATTTTACGGGCAATGCTCAGAAATCGGGGCAAAACCAACNGTTATACCAATGCTGAGGAGAGCCCACTAAAGACCTTGAAAAAGATGCGCCAAATATA  |   |      |   |      |   |      |   |      |   |      |   |      | : 3123 |
| Xenopeltis_unicolor        | : GATTTTACGGGCAATGCTCAGAAATCGGGGCAAAACCAACNGTTATACCAATGCTGAGGAGAGCCCACTAAAGACCTTGAAAAAGATGCGCCAAATATA  |   |      |   |      |   |      |   |      |   |      |   |      | : 3129 |
| Typhlops_reticulatus       | : GATTTTACGGGCAATGCTCAGAAATCGGGGCAAAACCAACNGTTATACCAATGCTGAGGAGAGCCCACTAAAGACCTTGAAAAAGATGCGCCAAATATA  |   |      |   |      |   |      |   |      |   |      |   |      | : 3051 |
| Leptotyphlops_dulcis       | : GATTTTACGGGCAATGCTCAGAAATCGGGGCAAAACCAACNGTTATACCAATGCTGAGGAGAGCCCACTAAAGACCTTGAAAAAGATGCGCCAAATATA  |   |      |   |      |   |      |   |      |   |      |   |      | : 3067 |
| Caiman_crocodilus          | : GATTTTACGGGCAATGCTCAGAAATCGGGGCAAAACCAACNGTTATACCAATGCTGAGGAGAGCCCACTAAAGACCTTGAAAAAGATGCGCCAAATATA  |   |      |   |      |   |      |   |      |   |      |   |      | : 3105 |
| Alligator_sinensis         | : GATTTTACGGGCAATGCTCAGAAATCGGGGCAAAACCAACNGTTATACCAATGCTGAGGAGAGCCCACTAAAGACCTTGAAAAAGATGCGCCAAATATA  |   |      |   |      |   |      |   |      |   |      |   |      | : 3123 |
| Alligator_mississippiensis | : GATTTTACGGGCAATGCTCAGAAATCGGGGCAAAACCAACNGTTATACCAATGCTGAGGAGAGCCCACTAAAGACCTTGAAAAAGATGCGCCAAATATA  |   |      |   |      |   |      |   |      |   |      |   |      | : 3075 |
| Gavialis_gangeticus        | : ATTTTATACGGGCAATGCTCAGAAATCGGGGCAAAACCAACNGTTATACCAATGCTGAGGAGAGCCCACTAAAGACCTTGAAAAAGATGCGCCAAATATA |   |      |   |      |   |      |   |      |   |      |   |      | : 3108 |
| Crocodylus_moreletii       | : ATTTTATACGGGCAATGCTCAGAAATCGGGGCAAAACCAACNGTTATACCAATGCTGAGGAGAGCCCACTAAAGACCTTGAAAAAGATGCGCCAAATATA |   |      |   |      |   |      |   |      |   |      |   |      | : 3084 |
| Dogania_subplana           | : ACCTTTACGGGCAATGCTCAGAAATCGGGGCAAAACCAACNGTTATACCAATGCTGAGGAGAGCCCACTAAAGACCTTGAAAAAGATGCGCCAAATATA  |   |      |   |      |   |      |   |      |   |      |   |      | : 3060 |
| Pelomedusa_subrufa         | : ATTTTACGGGCAATGCTCAGAAATCGGGGCAAAACCAACNGTTATACCAATGCTGAGGAGAGCCCACTAAAGACCTTGAAAAAGATGCGCCAAATATA   |   |      |   |      |   |      |   |      |   |      |   |      | : 3078 |
| Chrysemys_picta            | : GATTTTACGGGCAATGCTCAGAAATCGGGGCAAAACCAACNGTTATACCAATGCTGAGGAGAGCCCACTAAAGACCTTGAAAAAGATGCGCCAAATATA  |   |      |   |      |   |      |   |      |   |      |   |      | : 3096 |
| Chelonia_mydas             | : GATTTTACGGGCAATGCTCAGAAATCGGGGCAAAACCAACNGTTATACCAATGCTGAGGAGAGCCCACTAAAGACCTTGAAAAAGATGCGCCAAATATA  |   |      |   |      |   |      |   |      |   |      |   |      | : 3093 |
| Tinanus_major              | : ATTTTACGGGCAATGCTCAGAAATCGGGGCAAAACCAACNGTTATACCAATGCTGAGGAGAGCCCACTAAAGACCTTGAAAAAGATGCGCCAAATATA   |   |      |   |      |   |      |   |      |   |      |   |      | : 3078 |
| Smithornis_sharpei         | : ATTTTACGGGCAATGCTCAGAAATCGGGGCAAAACCAACNGTTATACCAATGCTGAGGAGAGCCCACTAAAGACCTTGAAAAAGATGCGCCAAATATA   |   |      |   |      |   |      |   |      |   |      |   |      | : 3075 |
| Corvus_frugilegus          | : GATTTTACGGGCAATGCTCAGAAATCGGGGCAAAACCAACNGTTATACCAATGCTGAGGAGAGCCCACTAAAGACCTTGAAAAAGATGCGCCAAATATA  |   |      |   |      |   |      |   |      |   |      |   |      | : 3075 |
| Vidua_chalybeata           | : GATTTTACGGGCAATGCTCAGAAATCGGGGCAAAACCAACNGTTATACCAATGCTGAGGAGAGCCCACTAAAGACCTTGAAAAAGATGCGCCAAATATA  |   |      |   |      |   |      |   |      |   |      |   |      | : 3075 |
| Buteo_buteo                | : ATTTTACGGGCAATGCTCAGAAATCGGGGCAAAACCAACNGTTATACCAATGCTGAGGAGAGCCCACTAAAGACCTTGAAAAAGATGCGCCAAATATA   |   |      |   |      |   |      |   |      |   |      |   |      | : 3075 |
| Falco_peregrinus           | : GATTTTACGGGCAATGCTCAGAAATCGGGGCAAAACCAACNGTTATACCAATGCTGAGGAGAGCCCACTAAAGACCTTGAAAAAGATGCGCCAAATATA  |   |      |   |      |   |      |   |      |   |      |   |      | : 3075 |
| Dromaius_novaeollandiae    | : ATTTTACGGGCAATGCTCAGAAATCGGGGCAAAACCAACNGTTATACCAATGCTGAGGAGAGCCCACTAAAGACCTTGAAAAAGATGCGCCAAATATA   |   |      |   |      |   |      |   |      |   |      |   |      | : 3078 |
| Struthio_camelus           | : ATTTTACGGGCAATGCTCAGAAATCGGGGCAAAACCAACNGTTATACCAATGCTGAGGAGAGCCCACTAAAGACCTTGAAAAAGATGCGCCAAATATA   |   |      |   |      |   |      |   |      |   |      |   |      | : 3081 |
| Apteryx_haastii            | : ATTTTACGGGCAATGCTCAGAAATCGGGGCAAAACCAACNGTTATACCAATGCTGAGGAGAGCCCACTAAAGACCTTGAAAAAGATGCGCCAAATATA   |   |      |   |      |   |      |   |      |   |      |   |      | : 3078 |
| Rhea_americana             | : ATTTTACGGGCAATGCTCAGAAATCGGGGCAAAACCAACNGTTATACCAATGCTGAGGAGAGCCCACTAAAGACCTTGAAAAAGATGCGCCAAATATA   |   |      |   |      |   |      |   |      |   |      |   |      | : 3081 |
| Gallus_gallus              | : GATTTTACGGGCAATGCTCAGAAATCGGGGCAAAACCAACNGTTATACCAATGCTGAGGAGAGCCCACTAAAGACCTTGAAAAAGATGCGCCAAATATA  |   |      |   |      |   |      |   |      |   |      |   |      | : 3069 |
| Ciconia_ciconia            | : ATTTTACGGGCAATGCTCAGAAATCGGGGCAAAACCAACNGTTATACCAATGCTGAGGAGAGCCCACTAAAGACCTTGAAAAAGATGCGCCAAATATA   |   |      |   |      |   |      |   |      |   |      |   |      | : 3075 |
| Ciconia_boycinana          | : ATTTTACGGGCAATGCTCAGAAATCGGGGCAAAACCAACNGTTATACCAATGCTGAGGAGAGCCCACTAAAGACCTTGAAAAAGATGCGCCAAATATA   |   |      |   |      |   |      |   |      |   |      |   |      | : 3075 |
| Iguana_iguana              | : GATTTTACGGGCAATGCTCAGAAATCGGGGCAAAACCAACNGTTATACCAATGCTGAGGAGAGCCCACTAAAGACCTTGAAAAAGATGCGCCAAATATA  |   |      |   |      |   |      |   |      |   |      |   |      | : 3078 |
| Eumeces_egregius           | : GATTTTACGGGCAATGCTCAGAAATCGGGGCAAAACCAACNGTTATACCAATGCTGAGGAGAGCCCACTAAAGACCTTGAAAAAGATGCGCCAAATATA  |   |      |   |      |   |      |   |      |   |      |   |      | : 3078 |
| Sphenodon_punctatus        | : GATTTTACGGGCAATGCTCAGAAATCGGGGCAAAACCAACNGTTATACCAATGCTGAGGAGAGCCCACTAAAGACCTTGAAAAAGATGCGCCAAATATA  |   |      |   |      |   |      |   |      |   |      |   |      | : 3075 |
| Sceloporus_occidentalis    | : GATTTTACGGGCAATGCTCAGAAATCGGGGCAAAACCAACNGTTATACCAATGCTGAGGAGAGCCCACTAAAGACCTTGAAAAAGATGCGCCAAATATA  |   |      |   |      |   |      |   |      |   |      |   |      | : 3078 |
| Cordylus_warreni           | : GATTTTACGGGCAATGCTCAGAAATCGGGGCAAAACCAACNGTTATACCAATGCTGAGGAGAGCCCACTAAAGACCTTGAAAAAGATGCGCCAAATATA  |   |      |   |      |   |      |   |      |   |      |   |      | : 3087 |
| Abronia_graminea           | : GATTTTACGGGCAATGCTCAGAAATCGGGGCAAAACCAACNGTTATACCAATGCTGAGGAGAGCCCACTAAAGACCTTGAAAAAGATGCGCCAAATATA  |   |      |   |      |   |      |   |      |   |      |   |      | : 3078 |
| Shinisaurus_crocodilurus   | : GATTTTACGGGCAATGCTCAGAAATCGGGGCAAAACCAACNGTTATACCAATGCTGAGGAGAGCCCACTAAAGACCTTGAAAAAGATGCGCCAAATATA  |   |      |   |      |   |      |   |      |   |      |   |      | : 3078 |
| Varanus_komodoensis        | : GATTTTACGGGCAATGCTCAGAAATCGGGGCAAAACCAACNGTTATACCAATGCTGAGGAGAGCCCACTAAAGACCTTGAAAAAGATGCGCCAAATATA  |   |      |   |      |   |      |   |      |   |      |   |      | : 3129 |
| Rhineura_floridana         | : GATTTTACGGGCAATGCTCAGAAATCGGGGCAAAACCAACNGTTATACCAATGCTGAGGAGAGCCCACTAAAGACCTTGAAAAAGATGCGCCAAATATA  |   |      |   |      |   |      |   |      |   |      |   |      | : 3069 |
| Geocalamus_acutus          | : ATTTTACGGGCAATGCTCAGAAATCGGGGCAAAACCAACNGTTATACCAATGCTGAGGAGAGCCCACTAAAGACCTTGAAAAAGATGCGCCAAATATA   |   |      |   |      |   |      |   |      |   |      |   |      | : 3054 |
| Diplometopon_zarudnyi      | : ATTTTACGGGCAATGCTCAGAAATCGGGGCAAAACCAACNGTTATACCAATGCTGAGGAGAGCCCACTAAAGACCTTGAAAAAGATGCGCCAAATATA   |   |      |   |      |   |      |   |      |   |      |   |      | : 3054 |
| Amphisbaena_schmidti       | : GATTTTACGGGCAATGCTCAGAAATCGGGGCAAAACCAACNGTTATACCAATGCTGAGGAGAGCCCACTAAAGACCTTGAAAAAGATGCGCCAAATATA  |   |      |   |      |   |      |   |      |   |      |   |      | : 3060 |
| Bipes_tridactylus          | : GATTTTACGGGCAATGCTCAGAAATCGGGGCAAAACCAACNGTTATACCAATGCTGAGGAGAGCCCACTAAAGACCTTGAAAAAGATGCGCCAAATATA  |   |      |   |      |   |      |   |      |   |      |   |      | : 3051 |
| Bipes_canaliculatus        | : GATTTTACGGGCAATGCTCAGAAATCGGGGCAAAACCAACNGTTATACCAATGCTGAGGAGAGCCCACTAAAGACCTTGAAAAAGATGCGCCAAATATA  |   |      |   |      |   |      |   |      |   |      |   |      | : 3051 |
| Bipes_biporus              | : ATTTTACGGGCAATGCTCAGAAATCGGGGCAAAACCAACNGTTATACCAATGCTGAGGAGAGCCCACTAAAGACCTTGAAAAAGATGCGCCAAATATA   |   |      |   |      |   |      |   |      |   |      |   |      | : 3054 |
| Anolis_carolinensis        | : ATTTTACGGGCAATGCTCAGAAATCGGGGCAAAACCAACNGTTATACCAATGCTGAGGAGAGCCCACTAAAGACCTTGAAAAAGATGCGCCAAATATA   |   |      |   |      |   |      |   |      |   |      |   |      | : 3077 |
| Ophisaurus_atnuatus        | : GATTTTACGGGCAATGCTCAGAAATCGGGGCAAAACCAACNGTTATACCAATGCTGAGGAGAGCCCACTAAAGACCTTGAAAAAGATGCGCCAAATATA  |   |      |   |      |   |      |   |      |   |      |   |      | : 3081 |
| Varanus_salvator           | : GATTTTACGGGCAATGCTCAGAAATCGGGGCAAAACCAACNGTTATACCAATGCTGAGGAGAGCCCACTAAAGACCTTGAAAAAGATGCGCCAAATATA  |   |      |   |      |   |      |   |      |   |      |   |      | : 3126 |
| Mertensiella_luschani      | : GATTTTACGGGCAATGCTCAGAAATCGGGGCAAAACCAACNGTTATACCAATGCTGAGGAGAGCCCACTAAAGACCTTGAAAAAGATGCGCCAAATATA  |   |      |   |      |   |      |   |      |   |      |   |      | : 3090 |
| Xenopus_laevis             | : GATTTTACGGGCAATGCTCAGAAATCGGGGCAAAACCAACNGTTATACCAATGCTGAGGAGAGCCCACTAAAGACCTTGAAAAAGATGCGCCAAATATA  |   |      |   |      |   |      |   |      |   |      |   |      | : 3084 |

```

*      3340      *      3360      *      3380      *      3400      *      3420      *      3440      *      34
Bos_taurus      : --GACACCCAAACGAGGCTATGCTATAGTAAAGCCAGGCCGCGACCTTAAAGGAGCTTGGAGCCCTCAAAATAAGCGGCCAAACATGGATTGCAATTAACAAAGCCCGCTAAAC : 3230
Hylobates_lar  : --ATGACCCCAACCCAGGCTATGCTATAGTAAAGCCAGGCCGCGACCTTAAAGGAGCTTGGAGCCCTCAAAATAAGCGGCCAAACATGGATTGCAATTAACAAAGCCCGCTAAAC : 3233
Lemur_catta     : --ATGACCCCAACCCAGGCTATGCTATAGTAAAGCCAGGCCGCGACCTTAAAGGAGCTTGGAGCCCTCAAAATAAGCGGCCAAACATGGATTGCAATTAACAAAGCCCGCTAAAC : 3233
Nycticebus_coucang : --ATGACCCCAACCCAGGCTATGCTATAGTAAAGCCAGGCCGCGACCTTAAAGGAGCTTGGAGCCCTCAAAATAAGCGGCCAAACATGGATTGCAATTAACAAAGCCCGCTAAAC : 3230
Tarsius_bancanus : --ATGACCCCAACCCAGGCTATGCTATAGTAAAGCCAGGCCGCGACCTTAAAGGAGCTTGGAGCCCTCAAAATAAGCGGCCAAACATGGATTGCAATTAACAAAGCCCGCTAAAC : 3230
Gorilla_gorilla : --ATGACCCCAACCCAGGCTATGCTATAGTAAAGCCAGGCCGCGACCTTAAAGGAGCTTGGAGCCCTCAAAATAAGCGGCCAAACATGGATTGCAATTAACAAAGCCCGCTAAAC : 3233
Homo_sapiens    : --ATGACCCCAACCCAGGCTATGCTATAGTAAAGCCAGGCCGCGACCTTAAAGGAGCTTGGAGCCCTCAAAATAAGCGGCCAAACATGGATTGCAATTAACAAAGCCCGCTAAAC : 3233
Papio_hamadryas : --ATGACCCCAACCCAGGCTATGCTATAGTAAAGCCAGGCCGCGACCTTAAAGGAGCTTGGAGCCCTCAAAATAAGCGGCCAAACATGGATTGCAATTAACAAAGCCCGCTAAAC : 3233
Cebus_albifrons : --ATGACCCCAACCCAGGCTATGCTATAGTAAAGCCAGGCCGCGACCTTAAAGGAGCTTGGAGCCCTCAAAATAAGCGGCCAAACATGGATTGCAATTAACAAAGCCCGCTAAAC : 3239
Macaca_sylvanus : --ATGACCCCAACCCAGGCTATGCTATAGTAAAGCCAGGCCGCGACCTTAAAGGAGCTTGGAGCCCTCAAAATAAGCGGCCAAACATGGATTGCAATTAACAAAGCCCGCTAAAC : 3230
Pongo_pygmaeus  : --ATGGTCCATCAATCAACGCTATGCTATAGTAAAGCCAGGCCGCGACCTTAAAGGAGCTTGGAGCCCTCAAAATAAGCGGCCAAACATGGATTGCAATTAACAAAGCCCGCTAAAC : 3233
Pan_paniscus    : --ATGGCCCAACCCAGGCTATGCTATAGTAAAGCCAGGCCGCGACCTTAAAGGAGCTTGGAGCCCTCAAAATAAGCGGCCAAACATGGATTGCAATTAACAAAGCCCGCTAAAC : 3233
Agkistrodon_piscivorus : --ATGGCCCAACCCAGGCTATGCTATAGTAAAGCCAGGCCGCGACCTTAAAGGAGCTTGGAGCCCTCAAAATAAGCGGCCAAACATGGATTGCAATTAACAAAGCCCGCTAAAC : 3254
Pantherophis_guttatus : --ATGACCCCAACCCAGGCTATGCTATAGTAAAGCCAGGCCGCGACCTTAAAGGAGCTTGGAGCCCTCAAAATAAGCGGCCAAACATGGATTGCAATTAACAAAGCCCGCTAAAC : 3248
Dinodon_semicarinatus : --ATGACCCCAACCCAGGCTATGCTATAGTAAAGCCAGGCCGCGACCTTAAAGGAGCTTGGAGCCCTCAAAATAAGCGGCCAAACATGGATTGCAATTAACAAAGCCCGCTAAAC : 3248
Boa_constrictor : --ATGACCCCAACCCAGGCTATGCTATAGTAAAGCCAGGCCGCGACCTTAAAGGAGCTTGGAGCCCTCAAAATAAGCGGCCAAACATGGATTGCAATTAACAAAGCCCGCTAAAC : 3257
Python_regius   : --ATGACCCCAACCCAGGCTATGCTATAGTAAAGCCAGGCCGCGACCTTAAAGGAGCTTGGAGCCCTCAAAATAAGCGGCCAAACATGGATTGCAATTAACAAAGCCCGCTAAAC : 3260
Acrochordus_granulatus : --ATGACCCCAACCCAGGCTATGCTATAGTAAAGCCAGGCCGCGACCTTAAAGGAGCTTGGAGCCCTCAAAATAAGCGGCCAAACATGGATTGCAATTAACAAAGCCCGCTAAAC : 3257
Cylindrophis_ruffus : --ATGACCCCAACCCAGGCTATGCTATAGTAAAGCCAGGCCGCGACCTTAAAGGAGCTTGGAGCCCTCAAAATAAGCGGCCAAACATGGATTGCAATTAACAAAGCCCGCTAAAC : 3218
Ovophis_okinavensis : --ATGACCCCAACCCAGGCTATGCTATAGTAAAGCCAGGCCGCGACCTTAAAGGAGCTTGGAGCCCTCAAAATAAGCGGCCAAACATGGATTGCAATTAACAAAGCCCGCTAAAC : 3254
Xenopeltis_unicolor : --ATGACCCCAACCCAGGCTATGCTATAGTAAAGCCAGGCCGCGACCTTAAAGGAGCTTGGAGCCCTCAAAATAAGCGGCCAAACATGGATTGCAATTAACAAAGCCCGCTAAAC : 3260
Thyphlops_reticulatus : --ATGACCCCAACCCAGGCTATGCTATAGTAAAGCCAGGCCGCGACCTTAAAGGAGCTTGGAGCCCTCAAAATAAGCGGCCAAACATGGATTGCAATTAACAAAGCCCGCTAAAC : 3182
Leptotyphlops_dulcis : --ATGACCCCAACCCAGGCTATGCTATAGTAAAGCCAGGCCGCGACCTTAAAGGAGCTTGGAGCCCTCAAAATAAGCGGCCAAACATGGATTGCAATTAACAAAGCCCGCTAAAC : 3198
Caiman_crocodilus : --ATGACCCCAACCCAGGCTATGCTATAGTAAAGCCAGGCCGCGACCTTAAAGGAGCTTGGAGCCCTCAAAATAAGCGGCCAAACATGGATTGCAATTAACAAAGCCCGCTAAAC : 3236
Alligator_sinensis : --ATGACCCCAACCCAGGCTATGCTATAGTAAAGCCAGGCCGCGACCTTAAAGGAGCTTGGAGCCCTCAAAATAAGCGGCCAAACATGGATTGCAATTAACAAAGCCCGCTAAAC : 3254
Alligator_mississippiensis : --ATGACCCCAACCCAGGCTATGCTATAGTAAAGCCAGGCCGCGACCTTAAAGGAGCTTGGAGCCCTCAAAATAAGCGGCCAAACATGGATTGCAATTAACAAAGCCCGCTAAAC : 3206
Gavialis_gangeticus : --ATGACCCCAACCCAGGCTATGCTATAGTAAAGCCAGGCCGCGACCTTAAAGGAGCTTGGAGCCCTCAAAATAAGCGGCCAAACATGGATTGCAATTAACAAAGCCCGCTAAAC : 3239
Crocodylus_moreletii : --ATGACCCCAACCCAGGCTATGCTATAGTAAAGCCAGGCCGCGACCTTAAAGGAGCTTGGAGCCCTCAAAATAAGCGGCCAAACATGGATTGCAATTAACAAAGCCCGCTAAAC : 3215
Dogania_subplana : --ATGACCCCAACCCAGGCTATGCTATAGTAAAGCCAGGCCGCGACCTTAAAGGAGCTTGGAGCCCTCAAAATAAGCGGCCAAACATGGATTGCAATTAACAAAGCCCGCTAAAC : 3191
Pelomedusa_subrufa : --ATGACCCCAACCCAGGCTATGCTATAGTAAAGCCAGGCCGCGACCTTAAAGGAGCTTGGAGCCCTCAAAATAAGCGGCCAAACATGGATTGCAATTAACAAAGCCCGCTAAAC : 3209
Chrysemys_picta : --ATGACCCCAACCCAGGCTATGCTATAGTAAAGCCAGGCCGCGACCTTAAAGGAGCTTGGAGCCCTCAAAATAAGCGGCCAAACATGGATTGCAATTAACAAAGCCCGCTAAAC : 3227
Chelonia_mydas : --ATGACCCCAACCCAGGCTATGCTATAGTAAAGCCAGGCCGCGACCTTAAAGGAGCTTGGAGCCCTCAAAATAAGCGGCCAAACATGGATTGCAATTAACAAAGCCCGCTAAAC : 3224
Tinamus_major   : --ATGACCCCAACCCAGGCTATGCTATAGTAAAGCCAGGCCGCGACCTTAAAGGAGCTTGGAGCCCTCAAAATAAGCGGCCAAACATGGATTGCAATTAACAAAGCCCGCTAAAC : 3209
Smithornis_sharpei : --ATGACCCCAACCCAGGCTATGCTATAGTAAAGCCAGGCCGCGACCTTAAAGGAGCTTGGAGCCCTCAAAATAAGCGGCCAAACATGGATTGCAATTAACAAAGCCCGCTAAAC : 3206
Corvus_frugilegus : --ATGACCCCAACCCAGGCTATGCTATAGTAAAGCCAGGCCGCGACCTTAAAGGAGCTTGGAGCCCTCAAAATAAGCGGCCAAACATGGATTGCAATTAACAAAGCCCGCTAAAC : 3206
Vidua_chalybeata : --ATGACCCCAACCCAGGCTATGCTATAGTAAAGCCAGGCCGCGACCTTAAAGGAGCTTGGAGCCCTCAAAATAAGCGGCCAAACATGGATTGCAATTAACAAAGCCCGCTAAAC : 3206
Buteo_buteo     : --ATGACCCCAACCCAGGCTATGCTATAGTAAAGCCAGGCCGCGACCTTAAAGGAGCTTGGAGCCCTCAAAATAAGCGGCCAAACATGGATTGCAATTAACAAAGCCCGCTAAAC : 3206
Falco_peregrinus : --ATGACCCCAACCCAGGCTATGCTATAGTAAAGCCAGGCCGCGACCTTAAAGGAGCTTGGAGCCCTCAAAATAAGCGGCCAAACATGGATTGCAATTAACAAAGCCCGCTAAAC : 3206
Dromaius_novaeollandiae : --ATGACCCCAACCCAGGCTATGCTATAGTAAAGCCAGGCCGCGACCTTAAAGGAGCTTGGAGCCCTCAAAATAAGCGGCCAAACATGGATTGCAATTAACAAAGCCCGCTAAAC : 3209
Struthio_camelus : --ATGACCCCAACCCAGGCTATGCTATAGTAAAGCCAGGCCGCGACCTTAAAGGAGCTTGGAGCCCTCAAAATAAGCGGCCAAACATGGATTGCAATTAACAAAGCCCGCTAAAC : 3212
Apteryx_haastii : --ATGACCCCAACCCAGGCTATGCTATAGTAAAGCCAGGCCGCGACCTTAAAGGAGCTTGGAGCCCTCAAAATAAGCGGCCAAACATGGATTGCAATTAACAAAGCCCGCTAAAC : 3209
Rhea_americanana : --ATGACCCCAACCCAGGCTATGCTATAGTAAAGCCAGGCCGCGACCTTAAAGGAGCTTGGAGCCCTCAAAATAAGCGGCCAAACATGGATTGCAATTAACAAAGCCCGCTAAAC : 3212
Gallus_gallus   : --ATGACCCCAACCCAGGCTATGCTATAGTAAAGCCAGGCCGCGACCTTAAAGGAGCTTGGAGCCCTCAAAATAAGCGGCCAAACATGGATTGCAATTAACAAAGCCCGCTAAAC : 3200
Ciconia_ciconia : --ATGACCCCAACCCAGGCTATGCTATAGTAAAGCCAGGCCGCGACCTTAAAGGAGCTTGGAGCCCTCAAAATAAGCGGCCAAACATGGATTGCAATTAACAAAGCCCGCTAAAC : 3206
Ciconia_boyciiana : --ATGACCCCAACCCAGGCTATGCTATAGTAAAGCCAGGCCGCGACCTTAAAGGAGCTTGGAGCCCTCAAAATAAGCGGCCAAACATGGATTGCAATTAACAAAGCCCGCTAAAC : 3206
Iguana_iguana   : --ATGACCCCAACCCAGGCTATGCTATAGTAAAGCCAGGCCGCGACCTTAAAGGAGCTTGGAGCCCTCAAAATAAGCGGCCAAACATGGATTGCAATTAACAAAGCCCGCTAAAC : 3209
Fumeaces_egregius : --ATGACCCCAACCCAGGCTATGCTATAGTAAAGCCAGGCCGCGACCTTAAAGGAGCTTGGAGCCCTCAAAATAAGCGGCCAAACATGGATTGCAATTAACAAAGCCCGCTAAAC : 3209
Sphenodon_punctatus : --ATGACCCCAACCCAGGCTATGCTATAGTAAAGCCAGGCCGCGACCTTAAAGGAGCTTGGAGCCCTCAAAATAAGCGGCCAAACATGGATTGCAATTAACAAAGCCCGCTAAAC : 3206
Sceloporus_occidentalis : --ATGACCCCAACCCAGGCTATGCTATAGTAAAGCCAGGCCGCGACCTTAAAGGAGCTTGGAGCCCTCAAAATAAGCGGCCAAACATGGATTGCAATTAACAAAGCCCGCTAAAC : 3209
Cordylus_warreni : --ATGACCCCAACCCAGGCTATGCTATAGTAAAGCCAGGCCGCGACCTTAAAGGAGCTTGGAGCCCTCAAAATAAGCGGCCAAACATGGATTGCAATTAACAAAGCCCGCTAAAC : 3218
Abronia_graminea : --ATGACCCCAACCCAGGCTATGCTATAGTAAAGCCAGGCCGCGACCTTAAAGGAGCTTGGAGCCCTCAAAATAAGCGGCCAAACATGGATTGCAATTAACAAAGCCCGCTAAAC : 3209
Shinisaurus_crocodilurus : --ATGACCCCAACCCAGGCTATGCTATAGTAAAGCCAGGCCGCGACCTTAAAGGAGCTTGGAGCCCTCAAAATAAGCGGCCAAACATGGATTGCAATTAACAAAGCCCGCTAAAC : 3209
Varanus_komodoensis : --ATGACCCCAACCCAGGCTATGCTATAGTAAAGCCAGGCCGCGACCTTAAAGGAGCTTGGAGCCCTCAAAATAAGCGGCCAAACATGGATTGCAATTAACAAAGCCCGCTAAAC : 3260
Rhinurea_floridana : --ATGACCCCAACCCAGGCTATGCTATAGTAAAGCCAGGCCGCGACCTTAAAGGAGCTTGGAGCCCTCAAAATAAGCGGCCAAACATGGATTGCAATTAACAAAGCCCGCTAAAC : 3200
Geocalamus_acutus : --ATGACCCCAACCCAGGCTATGCTATAGTAAAGCCAGGCCGCGACCTTAAAGGAGCTTGGAGCCCTCAAAATAAGCGGCCAAACATGGATTGCAATTAACAAAGCCCGCTAAAC : 3185
Diplometopon_zarudnyi : --ATGACCCCAACCCAGGCTATGCTATAGTAAAGCCAGGCCGCGACCTTAAAGGAGCTTGGAGCCCTCAAAATAAGCGGCCAAACATGGATTGCAATTAACAAAGCCCGCTAAAC : 3185
Amphisbaena_schmidti : --ATGACCCCAACCCAGGCTATGCTATAGTAAAGCCAGGCCGCGACCTTAAAGGAGCTTGGAGCCCTCAAAATAAGCGGCCAAACATGGATTGCAATTAACAAAGCCCGCTAAAC : 3191
Bipes_tridactylus : --ATGACCCCAACCCAGGCTATGCTATAGTAAAGCCAGGCCGCGACCTTAAAGGAGCTTGGAGCCCTCAAAATAAGCGGCCAAACATGGATTGCAATTAACAAAGCCCGCTAAAC : 3182
Bipes_canaliculatus : --ATGACCCCAACCCAGGCTATGCTATAGTAAAGCCAGGCCGCGACCTTAAAGGAGCTTGGAGCCCTCAAAATAAGCGGCCAAACATGGATTGCAATTAACAAAGCCCGCTAAAC : 3182
Bipes_biparis : --ATGACCCCAACCCAGGCTATGCTATAGTAAAGCCAGGCCGCGACCTTAAAGGAGCTTGGAGCCCTCAAAATAAGCGGCCAAACATGGATTGCAATTAACAAAGCCCGCTAAAC : 3185
Anolis_carolinensis : --ATGACCCCAACCCAGGCTATGCTATAGTAAAGCCAGGCCGCGACCTTAAAGGAGCTTGGAGCCCTCAAAATAAGCGGCCAAACATGGATTGCAATTAACAAAGCCCGCTAAAC : 3208
Ophisaurus_attnuatus : --ATGACCCCAACCCAGGCTATGCTATAGTAAAGCCAGGCCGCGACCTTAAAGGAGCTTGGAGCCCTCAAAATAAGCGGCCAAACATGGATTGCAATTAACAAAGCCCGCTAAAC : 3210
Varanus_salvator : --ATGACCCCAACCCAGGCTATGCTATAGTAAAGCCAGGCCGCGACCTTAAAGGAGCTTGGAGCCCTCAAAATAAGCGGCCAAACATGGATTGCAATTAACAAAGCCCGCTAAAC : 3257
Mertensiella_luschani : --ATGACCCCAACCCAGGCTATGCTATAGTAAAGCCAGGCCGCGACCTTAAAGGAGCTTGGAGCCCTCAAAATAAGCGGCCAAACATGGATTGCAATTAACAAAGCCCGCTAAAC : 3221
Xenopus_laevis  : --ATGACCCCAACCCAGGCTATGCTATAGTAAAGCCAGGCCGCGACCTTAAAGGAGCTTGGAGCCCTCAAAATAAGCGGCCAAACATGGATTGCAATTAACAAAGCCCGCTAAAC : 3215

```

|                            |    |           |        |         |         |         |        |          |        |          |        |         |        |         |        |      |
|----------------------------|----|-----------|--------|---------|---------|---------|--------|----------|--------|----------|--------|---------|--------|---------|--------|------|
|                            | 60 | *         | 3480   | *       | 3500    | *       | 3520   | *        | 3540   | *        | 3560   | *       | 3580   | *       |        |      |
| Bos_taurus                 | :  | AAATGGCC  | AAACAA | AAATATA | AAACAA  | AAATATA | AAACAA | AAATATA  | AAACAA | AAATATA  | AAACAA | AAATATA | AAACAA | AAATATA | AAACAA | 3363 |
| Hylobates_lar              | :  | ACTAGGC   | CTA    | CAATAA  | CGCTAAC | CAATAT  | CCAAAG | GGGGCCCG | CGA    | CGCGAAAG | GCCTA  | CCANGG  | CCCAAT | CCCCCG  | CGT    | 3366 |
| Lemur_catta                | :  | ACTAGGC   | CTA    | CAATAA  | CGCTAAC | CAATAT  | CCAAAG | GGGGCCCG | CGA    | CGCGAAAG | GCCTA  | CCANGG  | CCCAAT | CCCCCG  | CGT    | 3366 |
| Nycticebus_coucang         | :  | CCGGGCT   | CTA    | CAATAA  | CGCTAAC | CAATAT  | CCAAAG | GGGGCCCG | CGA    | CGCGAAAG | GCCTA  | CCANGG  | CCCAAT | CCCCCG  | CGT    | 3363 |
| Tarsius_bancanus           | :  | CTTAGGCC  | CTA    | CAATAA  | CGCTAAC | CAATAT  | CCAAAG | GGGGCCCG | CGA    | CGCGAAAG | GCCTA  | CCANGG  | CCCAAT | CCCCCG  | CGT    | 3363 |
| Gorilla_gorilla            | :  | ACTAGGCC  | CTA    | CAATAA  | CGCTAAC | CAATAT  | CCAAAG | GGGGCCCG | CGA    | CGCGAAAG | GCCTA  | CCANGG  | CCCAAT | CCCCCG  | CGT    | 3366 |
| Homo_sapiens               | :  | ACTAGGCC  | CTA    | CAATAA  | CGCTAAC | CAATAT  | CCAAAG | GGGGCCCG | CGA    | CGCGAAAG | GCCTA  | CCANGG  | CCCAAT | CCCCCG  | CGT    | 3366 |
| Papio_hamadryas            | :  | ACTAGGCC  | CTA    | CAATAA  | CGCTAAC | CAATAT  | CCAAAG | GGGGCCCG | CGA    | CGCGAAAG | GCCTA  | CCANGG  | CCCAAT | CCCCCG  | CGT    | 3366 |
| Cebus_albifrons            | :  | CTGAGGC   | CTA    | CAATAA  | CGCTAAC | CAATAT  | CCAAAG | GGGGCCCG | CGA    | CGCGAAAG | GCCTA  | CCANGG  | CCCAAT | CCCCCG  | CGT    | 3372 |
| Macaca_sylvanus            | :  | ACTAGGCC  | CTA    | CAATAA  | CGCTAAC | CAATAT  | CCAAAG | GGGGCCCG | CGA    | CGCGAAAG | GCCTA  | CCANGG  | CCCAAT | CCCCCG  | CGT    | 3363 |
| Pongo_pygmaeus             | :  | AAAGGCC   | CTA    | CAATAA  | CGCTAAC | CAATAT  | CCAAAG | GGGGCCCG | CGA    | CGCGAAAG | GCCTA  | CCANGG  | CCCAAT | CCCCCG  | CGT    | 3366 |
| Pan_paniscus               | :  | ACTAGGCC  | CTA    | CAATAA  | CGCTAAC | CAATAT  | CCAAAG | GGGGCCCG | CGA    | CGCGAAAG | GCCTA  | CCANGG  | CCCAAT | CCCCCG  | CGT    | 3366 |
| Agkistrodon_piscivorus     | :  | ALTAGGAC  | CTA    | CAATAA  | CGCTAAC | CAATAT  | CCAAAG | GGGGCCCG | CGA    | CGCGAAAG | GCCTA  | CCANGG  | CCCAAT | CCCCCG  | CGT    | 3387 |
| Pantherophis_guttatus      | :  | AAATAGGAC | CTA    | CAATAA  | CGCTAAC | CAATAT  | CCAAAG | GGGGCCCG | CGA    | CGCGAAAG | GCCTA  | CCANGG  | CCCAAT | CCCCCG  | CGT    | 3381 |
| Dinodon_semicarinatus      | :  | AAATAGGAC | CTA    | CAATAA  | CGCTAAC | CAATAT  | CCAAAG | GGGGCCCG | CGA    | CGCGAAAG | GCCTA  | CCANGG  | CCCAAT | CCCCCG  | CGT    | 3381 |
| Boa_constrictor            | :  | ACTAGGC   | CTA    | CAATAA  | CGCTAAC | CAATAT  | CCAAAG | GGGGCCCG | CGA    | CGCGAAAG | GCCTA  | CCANGG  | CCCAAT | CCCCCG  | CGT    | 3390 |
| Python_regius              | :  | ACTAGGC   | CTA    | CAATAA  | CGCTAAC | CAATAT  | CCAAAG | GGGGCCCG | CGA    | CGCGAAAG | GCCTA  | CCANGG  | CCCAAT | CCCCCG  | CGT    | 3393 |
| Acrochordus_granulatus     | :  | ACTAGGC   | CTA    | CAATAA  | CGCTAAC | CAATAT  | CCAAAG | GGGGCCCG | CGA    | CGCGAAAG | GCCTA  | CCANGG  | CCCAAT | CCCCCG  | CGT    | 3390 |
| Cylindrophis_ruffus        | :  | ACTAGGC   | CTA    | CAATAA  | CGCTAAC | CAATAT  | CCAAAG | GGGGCCCG | CGA    | CGCGAAAG | GCCTA  | CCANGG  | CCCAAT | CCCCCG  | CGT    | 3351 |
| Ovophis_okinavensis        | :  | ACTAGGC   | CTA    | CAATAA  | CGCTAAC | CAATAT  | CCAAAG | GGGGCCCG | CGA    | CGCGAAAG | GCCTA  | CCANGG  | CCCAAT | CCCCCG  | CGT    | 3387 |
| Xenopeltis_unicolor        | :  | ACTAGGC   | CTA    | CAATAA  | CGCTAAC | CAATAT  | CCAAAG | GGGGCCCG | CGA    | CGCGAAAG | GCCTA  | CCANGG  | CCCAAT | CCCCCG  | CGT    | 3393 |
| Typhlops_reticulatus       | :  | ACTAGGC   | CTA    | CAATAA  | CGCTAAC | CAATAT  | CCAAAG | GGGGCCCG | CGA    | CGCGAAAG | GCCTA  | CCANGG  | CCCAAT | CCCCCG  | CGT    | 3315 |
| Leptotyphlops_dulcis       | :  | ACTAGGC   | CTA    | CAATAA  | CGCTAAC | CAATAT  | CCAAAG | GGGGCCCG | CGA    | CGCGAAAG | GCCTA  | CCANGG  | CCCAAT | CCCCCG  | CGT    | 3331 |
| Caiman_crocodilus          | :  | ACTAGGC   | CTA    | CAATAA  | CGCTAAC | CAATAT  | CCAAAG | GGGGCCCG | CGA    | CGCGAAAG | GCCTA  | CCANGG  | CCCAAT | CCCCCG  | CGT    | 3369 |
| Alligator_sinensis         | :  | ACTAGGC   | CTA    | CAATAA  | CGCTAAC | CAATAT  | CCAAAG | GGGGCCCG | CGA    | CGCGAAAG | GCCTA  | CCANGG  | CCCAAT | CCCCCG  | CGT    | 3387 |
| Alligator_mississippiensis | :  | ACTAGGC   | CTA    | CAATAA  | CGCTAAC | CAATAT  | CCAAAG | GGGGCCCG | CGA    | CGCGAAAG | GCCTA  | CCANGG  | CCCAAT | CCCCCG  | CGT    | 3339 |
| Gavialis_gangeticus        | :  | ACTAGGC   | CTA    | CAATAA  | CGCTAAC | CAATAT  | CCAAAG | GGGGCCCG | CGA    | CGCGAAAG | GCCTA  | CCANGG  | CCCAAT | CCCCCG  | CGT    | 3372 |
| Crocodylus_moreletii       | :  | ACTAGGC   | CTA    | CAATAA  | CGCTAAC | CAATAT  | CCAAAG | GGGGCCCG | CGA    | CGCGAAAG | GCCTA  | CCANGG  | CCCAAT | CCCCCG  | CGT    | 3348 |
| Dogania_subplana           | :  | ACTAGGC   | CTA    | CAATAA  | CGCTAAC | CAATAT  | CCAAAG | GGGGCCCG | CGA    | CGCGAAAG | GCCTA  | CCANGG  | CCCAAT | CCCCCG  | CGT    | 3324 |
| Pelomedusa_subrufa         | :  | ACTAGGC   | CTA    | CAATAA  | CGCTAAC | CAATAT  | CCAAAG | GGGGCCCG | CGA    | CGCGAAAG | GCCTA  | CCANGG  | CCCAAT | CCCCCG  | CGT    | 3342 |
| Chrysemys_picta            | :  | ACTAGGC   | CTA    | CAATAA  | CGCTAAC | CAATAT  | CCAAAG | GGGGCCCG | CGA    | CGCGAAAG | GCCTA  | CCANGG  | CCCAAT | CCCCCG  | CGT    | 3360 |
| Chelonia_mydas             | :  | ACTAGGC   | CTA    | CAATAA  | CGCTAAC | CAATAT  | CCAAAG | GGGGCCCG | CGA    | CGCGAAAG | GCCTA  | CCANGG  | CCCAAT | CCCCCG  | CGT    | 3357 |
| Tinamus_major              | :  | ACTAGGC   | CTA    | CAATAA  | CGCTAAC | CAATAT  | CCAAAG | GGGGCCCG | CGA    | CGCGAAAG | GCCTA  | CCANGG  | CCCAAT | CCCCCG  | CGT    | 3342 |
| Smithornis_sharpei         | :  | ACTAGGC   | CTA    | CAATAA  | CGCTAAC | CAATAT  | CCAAAG | GGGGCCCG | CGA    | CGCGAAAG | GCCTA  | CCANGG  | CCCAAT | CCCCCG  | CGT    | 3339 |
| Corvus_frugilegus          | :  | ACTAGGC   | CTA    | CAATAA  | CGCTAAC | CAATAT  | CCAAAG | GGGGCCCG | CGA    | CGCGAAAG | GCCTA  | CCANGG  | CCCAAT | CCCCCG  | CGT    | 3339 |
| Vidua_chalybeata           | :  | ACTAGGC   | CTA    | CAATAA  | CGCTAAC | CAATAT  | CCAAAG | GGGGCCCG | CGA    | CGCGAAAG | GCCTA  | CCANGG  | CCCAAT | CCCCCG  | CGT    | 3339 |
| Buteo_buteo                | :  | ACTAGGC   | CTA    | CAATAA  | CGCTAAC | CAATAT  | CCAAAG | GGGGCCCG | CGA    | CGCGAAAG | GCCTA  | CCANGG  | CCCAAT | CCCCCG  | CGT    | 3339 |
| Falco_peregrinus           | :  | ACTAGGC   | CTA    | CAATAA  | CGCTAAC | CAATAT  | CCAAAG | GGGGCCCG | CGA    | CGCGAAAG | GCCTA  | CCANGG  | CCCAAT | CCCCCG  | CGT    | 3339 |
| Dromaius_novaeollandiae    | :  | ACTAGGC   | CTA    | CAATAA  | CGCTAAC | CAATAT  | CCAAAG | GGGGCCCG | CGA    | CGCGAAAG | GCCTA  | CCANGG  | CCCAAT | CCCCCG  | CGT    | 3342 |
| Struthio_camelus           | :  | ACTAGGC   | CTA    | CAATAA  | CGCTAAC | CAATAT  | CCAAAG | GGGGCCCG | CGA    | CGCGAAAG | GCCTA  | CCANGG  | CCCAAT | CCCCCG  | CGT    | 3345 |
| Apteryx_haastii            | :  | ACTAGGC   | CTA    | CAATAA  | CGCTAAC | CAATAT  | CCAAAG | GGGGCCCG | CGA    | CGCGAAAG | GCCTA  | CCANGG  | CCCAAT | CCCCCG  | CGT    | 3342 |
| Rhea_americanana           | :  | ACTAGGC   | CTA    | CAATAA  | CGCTAAC | CAATAT  | CCAAAG | GGGGCCCG | CGA    | CGCGAAAG | GCCTA  | CCANGG  | CCCAAT | CCCCCG  | CGT    | 3345 |
| Gallus_gallus              | :  | ACTAGGC   | CTA    | CAATAA  | CGCTAAC | CAATAT  | CCAAAG | GGGGCCCG | CGA    | CGCGAAAG | GCCTA  | CCANGG  | CCCAAT | CCCCCG  | CGT    | 3333 |
| Ciconia_ciconia            | :  | ACTAGGC   | CTA    | CAATAA  | CGCTAAC | CAATAT  | CCAAAG | GGGGCCCG | CGA    | CGCGAAAG | GCCTA  | CCANGG  | CCCAAT | CCCCCG  | CGT    | 3339 |
| Ciconia_boyciana           | :  | ACTAGGC   | CTA    | CAATAA  | CGCTAAC | CAATAT  | CCAAAG | GGGGCCCG | CGA    | CGCGAAAG | GCCTA  | CCANGG  | CCCAAT | CCCCCG  | CGT    | 3339 |
| Iguana_iguana              | :  | ACTAGGC   | CTA    | CAATAA  | CGCTAAC | CAATAT  | CCAAAG | GGGGCCCG | CGA    | CGCGAAAG | GCCTA  | CCANGG  | CCCAAT | CCCCCG  | CGT    | 3342 |
| Eumeces_egregius           | :  | ACTAGGC   | CTA    | CAATAA  | CGCTAAC | CAATAT  | CCAAAG | GGGGCCCG | CGA    | CGCGAAAG | GCCTA  | CCANGG  | CCCAAT | CCCCCG  | CGT    | 3342 |
| Sphenodon_punctatus        | :  | ACTAGGC   | CTA    | CAATAA  | CGCTAAC | CAATAT  | CCAAAG | GGGGCCCG | CGA    | CGCGAAAG | GCCTA  | CCANGG  | CCCAAT | CCCCCG  | CGT    | 3339 |
| Sceloporus_occidentalis    | :  | ACTAGGC   | CTA    | CAATAA  | CGCTAAC | CAATAT  | CCAAAG | GGGGCCCG | CGA    | CGCGAAAG | GCCTA  | CCANGG  | CCCAAT | CCCCCG  | CGT    | 3342 |
| Cordylus_warreni           | :  | ACTAGGC   | CTA    | CAATAA  | CGCTAAC | CAATAT  | CCAAAG | GGGGCCCG | CGA    | CGCGAAAG | GCCTA  | CCANGG  | CCCAAT | CCCCCG  | CGT    | 3351 |
| Abronia_graminea           | :  | ACTAGGC   | CTA    | CAATAA  | CGCTAAC | CAATAT  | CCAAAG | GGGGCCCG | CGA    | CGCGAAAG | GCCTA  | CCANGG  | CCCAAT | CCCCCG  | CGT    | 3342 |
| Shinisaurus_crocodilurus   | :  | ACTAGGC   | CTA    | CAATAA  | CGCTAAC | CAATAT  | CCAAAG | GGGGCCCG | CGA    | CGCGAAAG | GCCTA  | CCANGG  | CCCAAT | CCCCCG  | CGT    | 3342 |
| Varanus_komodoensis        | :  | ACTAGGC   | CTA    | CAATAA  | CGCTAAC | CAATAT  | CCAAAG | GGGGCCCG | CGA    | CGCGAAAG | GCCTA  | CCANGG  | CCCAAT | CCCCCG  | CGT    | 3393 |
| Rhineura_floridana         | :  | ACTAGGC   | CTA    | CAATAA  | CGCTAAC | CAATAT  | CCAAAG | GGGGCCCG | CGA    | CGCGAAAG | GCCTA  | CCANGG  | CCCAAT | CCCCCG  | CGT    | 3333 |
| Geocalamus_acutus          | :  | ACTAGGC   | CTA    | CAATAA  | CGCTAAC | CAATAT  | CCAAAG | GGGGCCCG | CGA    | CGCGAAAG | GCCTA  | CCANGG  | CCCAAT | CCCCCG  | CGT    | 3318 |
| Diplometopon_zarudnyi      | :  | ACTAGGC   | CTA    | CAATAA  | CGCTAAC | CAATAT  | CCAAAG | GGGGCCCG | CGA    | CGCGAAAG | GCCTA  | CCANGG  | CCCAAT | CCCCCG  | CGT    | 3318 |
| Amphisbaena_schmidti       | :  | ACTAGGC   | CTA    | CAATAA  | CGCTAAC | CAATAT  | CCAAAG | GGGGCCCG | CGA    | CGCGAAAG | GCCTA  | CCANGG  | CCCAAT | CCCCCG  | CGT    | 3324 |
| Bipes_tridactylus          | :  | ACTAGGC   | CTA    | CAATAA  | CGCTAAC | CAATAT  | CCAAAG | GGGGCCCG | CGA    | CGCGAAAG | GCCTA  | CCANGG  | CCCAAT | CCCCCG  | CGT    | 3315 |
| Bipes_canaliculatus        | :  | ACTAGGC   | CTA    | CAATAA  | CGCTAAC | CAATAT  | CCAAAG | GGGGCCCG | CGA    | CGCGAAAG | GCCTA  | CCANGG  | CCCAAT | CCCCCG  | CGT    | 3315 |
| Bipes_biporus              | :  | ACTAGGC   | CTA    | CAATAA  | CGCTAAC | CAATAT  | CCAAAG | GGGGCCCG | CGA    | CGCGAAAG | GCCTA  | CCANGG  | CCCAAT | CCCCCG  | CGT    | 3318 |
| Anolis_carolinensis        | :  | ACTAGGC   | CTA    | CAATAA  | CGCTAAC | CAATAT  | CCAAAG | GGGGCCCG | CGA    | CGCGAAAG | GCCTA  | CCANGG  | CCCAAT | CCCCCG  | CGT    | 3341 |
| Ophisaurus_atnuatus        | :  | ACTAGGC   | CTA    | CAATAA  | CGCTAAC | CAATAT  | CCAAAG | GGGGCCCG | CGA    | CGCGAAAG | GCCTA  | CCANGG  | CCCAAT | CCCCCG  | CGT    | 3343 |
| Varanus_salvator           | :  | ACTAGGC   | CTA    | CAATAA  | CGCTAAC | CAATAT  | CCAAAG | GGGGCCCG | CGA    | CGCGAAAG | GCCTA  | CCANGG  | CCCAAT | CCCCCG  | CGT    | 3390 |
| Mertensiella_luschani      | :  | ACTAGGC   | CTA    | CAATAA  | CGCTAAC | CAATAT  | CCAAAG | GGGGCCCG | CGA    | CGCGAAAG | GCCTA  | CCANGG  | CCCAAT | CCCCCG  | CGT    | 3354 |
| Xenopus_laevis             | :  | ACTAGGC   | CTA    | CAATAA  | CGCTAAC | CAATAT  | CCAAAG | GGGGCCCG | CGA    | CGCGAAAG | GCCTA  | CCANGG  | CCCAAT | CCCCCG  | CGT    | 3348 |

|                            | 3600 | *      | 3620 | *  | 3640 | *  | 3660 | *  | 3680 | *  | 3700 | *  | 3720 |        |
|----------------------------|------|--------|------|----|------|----|------|----|------|----|------|----|------|--------|
| Bos_taurus                 | :    | CCGAAG | AA   | AA | AA   | AA | AA   | AA | AA   | AA | AA   | AA | AA   | : 3496 |
| Hylobates_lar              | :    | CCGAAG | AA   | AA | AA   | AA | AA   | AA | AA   | AA | AA   | AA | AA   | : 3499 |
| Lemur_catta                | :    | CCGAAG | AA   | AA | AA   | AA | AA   | AA | AA   | AA | AA   | AA | AA   | : 3499 |
| Nycticebus_coucang         | :    | CCGAAG | AA   | AA | AA   | AA | AA   | AA | AA   | AA | AA   | AA | AA   | : 3496 |
| Tarsius_bancanus           | :    | CCGAAG | AA   | AA | AA   | AA | AA   | AA | AA   | AA | AA   | AA | AA   | : 3496 |
| Gorilla_gorilla            | :    | CCGAAG | AA   | AA | AA   | AA | AA   | AA | AA   | AA | AA   | AA | AA   | : 3499 |
| Homo_sapiens               | :    | CCGAAG | AA   | AA | AA   | AA | AA   | AA | AA   | AA | AA   | AA | AA   | : 3499 |
| Papio_hamadryas            | :    | CCGAAG | AA   | AA | AA   | AA | AA   | AA | AA   | AA | AA   | AA | AA   | : 3499 |
| Cebus_albifrons            | :    | CCGAAG | AA   | AA | AA   | AA | AA   | AA | AA   | AA | AA   | AA | AA   | : 3505 |
| Macaca_sylvanus            | :    | CCGAAG | AA   | AA | AA   | AA | AA   | AA | AA   | AA | AA   | AA | AA   | : 3496 |
| Pongo_pygmaeus             | :    | CCGAAG | AA   | AA | AA   | AA | AA   | AA | AA   | AA | AA   | AA | AA   | : 3499 |
| Pan_paniscus               | :    | CCGAAG | AA   | AA | AA   | AA | AA   | AA | AA   | AA | AA   | AA | AA   | : 3499 |
| Agkistrodon_piscivorus     | :    | CCGAAG | AA   | AA | AA   | AA | AA   | AA | AA   | AA | AA   | AA | AA   | : 3520 |
| Pantherophis_guttatus      | :    | CCGAAG | AA   | AA | AA   | AA | AA   | AA | AA   | AA | AA   | AA | AA   | : 3514 |
| Dinodon_semicarinatus      | :    | CCGAAG | AA   | AA | AA   | AA | AA   | AA | AA   | AA | AA   | AA | AA   | : 3514 |
| Boa_constrictor            | :    | CCGAAG | AA   | AA | AA   | AA | AA   | AA | AA   | AA | AA   | AA | AA   | : 3523 |
| Python_regius              | :    | CCGAAG | AA   | AA | AA   | AA | AA   | AA | AA   | AA | AA   | AA | AA   | : 3526 |
| Acrochordus_granulatus     | :    | CCGAAG | AA   | AA | AA   | AA | AA   | AA | AA   | AA | AA   | AA | AA   | : 3523 |
| Cylindrophis_ruffus        | :    | CCGAAG | AA   | AA | AA   | AA | AA   | AA | AA   | AA | AA   | AA | AA   | : 3484 |
| Ovophis_okinavensis        | :    | CCGAAG | AA   | AA | AA   | AA | AA   | AA | AA   | AA | AA   | AA | AA   | : 3520 |
| Xenopeltis_unicolor        | :    | CCGAAG | AA   | AA | AA   | AA | AA   | AA | AA   | AA | AA   | AA | AA   | : 3526 |
| Thelphaps_reticulatus      | :    | CCGAAG | AA   | AA | AA   | AA | AA   | AA | AA   | AA | AA   | AA | AA   | : 3448 |
| Leptotyphlops_dulcis       | :    | CCGAAG | AA   | AA | AA   | AA | AA   | AA | AA   | AA | AA   | AA | AA   | : 3464 |
| Caiman_crocodilus          | :    | CCGAAG | AA   | AA | AA   | AA | AA   | AA | AA   | AA | AA   | AA | AA   | : 3502 |
| Alligator_sinensis         | :    | CCGAAG | AA   | AA | AA   | AA | AA   | AA | AA   | AA | AA   | AA | AA   | : 3520 |
| Alligator_mississippiensis | :    | CCGAAG | AA   | AA | AA   | AA | AA   | AA | AA   | AA | AA   | AA | AA   | : 3472 |
| Gavialis_gangeticus        | :    | CCGAAG | AA   | AA | AA   | AA | AA   | AA | AA   | AA | AA   | AA | AA   | : 3505 |
| Crocodylus_moreletii       | :    | CCGAAG | AA   | AA | AA   | AA | AA   | AA | AA   | AA | AA   | AA | AA   | : 3481 |
| Dogania_subplana           | :    | CCGAAG | AA   | AA | AA   | AA | AA   | AA | AA   | AA | AA   | AA | AA   | : 3457 |
| Pelomedusa_subrufa         | :    | CCGAAG | AA   | AA | AA   | AA | AA   | AA | AA   | AA | AA   | AA | AA   | : 3475 |
| Chelysemys_picta           | :    | CCGAAG | AA   | AA | AA   | AA | AA   | AA | AA   | AA | AA   | AA | AA   | : 3493 |
| Chelonia_mydas             | :    | CCGAAG | AA   | AA | AA   | AA | AA   | AA | AA   | AA | AA   | AA | AA   | : 3490 |
| Tinanus_major              | :    | CCGAAG | AA   | AA | AA   | AA | AA   | AA | AA   | AA | AA   | AA | AA   | : 3475 |
| Smithornis_sharpei         | :    | CCGAAG | AA   | AA | AA   | AA | AA   | AA | AA   | AA | AA   | AA | AA   | : 3472 |
| Corvus_frugilegus          | :    | CCGAAG | AA   | AA | AA   | AA | AA   | AA | AA   | AA | AA   | AA | AA   | : 3472 |
| Vidua_chalybeata           | :    | CCGAAG | AA   | AA | AA   | AA | AA   | AA | AA   | AA | AA   | AA | AA   | : 3472 |
| Buteo_buteo                | :    | CCGAAG | AA   | AA | AA   | AA | AA   | AA | AA   | AA | AA   | AA | AA   | : 3472 |
| Falco_peregrinus           | :    | CCGAAG | AA   | AA | AA   | AA | AA   | AA | AA   | AA | AA   | AA | AA   | : 3472 |
| Dromaius_novaeollandiae    | :    | CCGAAG | AA   | AA | AA   | AA | AA   | AA | AA   | AA | AA   | AA | AA   | : 3475 |
| Struthio_camelus           | :    | CCGAAG | AA   | AA | AA   | AA | AA   | AA | AA   | AA | AA   | AA | AA   | : 3478 |
| Apteryx_haastii            | :    | CCGAAG | AA   | AA | AA   | AA | AA   | AA | AA   | AA | AA   | AA | AA   | : 3475 |
| Rhea_americanana           | :    | CCGAAG | AA   | AA | AA   | AA | AA   | AA | AA   | AA | AA   | AA | AA   | : 3478 |
| Gallus_gallus              | :    | CCGAAG | AA   | AA | AA   | AA | AA   | AA | AA   | AA | AA   | AA | AA   | : 3466 |
| Ciconia_ciconia            | :    | CCGAAG | AA   | AA | AA   | AA | AA   | AA | AA   | AA | AA   | AA | AA   | : 3472 |
| Ciconia_boyciiana          | :    | CCGAAG | AA   | AA | AA   | AA | AA   | AA | AA   | AA | AA   | AA | AA   | : 3472 |
| Iguana_iguana              | :    | CCGAAG | AA   | AA | AA   | AA | AA   | AA | AA   | AA | AA   | AA | AA   | : 3475 |
| Eumeces_egregius           | :    | CCGAAG | AA   | AA | AA   | AA | AA   | AA | AA   | AA | AA   | AA | AA   | : 3475 |
| Sphenodon_punctatus        | :    | CCGAAG | AA   | AA | AA   | AA | AA   | AA | AA   | AA | AA   | AA | AA   | : 3472 |
| Sceloporus_occidentalis    | :    | CCGAAG | AA   | AA | AA   | AA | AA   | AA | AA   | AA | AA   | AA | AA   | : 3475 |
| Cordylus_warreni           | :    | CCGAAG | AA   | AA | AA   | AA | AA   | AA | AA   | AA | AA   | AA | AA   | : 3484 |
| Abronia_graminea           | :    | CCGAAG | AA   | AA | AA   | AA | AA   | AA | AA   | AA | AA   | AA | AA   | : 3475 |
| Shinisaurus_crocodilurus   | :    | CCGAAG | AA   | AA | AA   | AA | AA   | AA | AA   | AA | AA   | AA | AA   | : 3475 |
| Varanus_komodoensis        | :    | CCGAAG | AA   | AA | AA   | AA | AA   | AA | AA   | AA | AA   | AA | AA   | : 3526 |
| Rhineura_floridana         | :    | CCGAAG | AA   | AA | AA   | AA | AA   | AA | AA   | AA | AA   | AA | AA   | : 3466 |
| Geocalamus_acutus          | :    | CCGAAG | AA   | AA | AA   | AA | AA   | AA | AA   | AA | AA   | AA | AA   | : 3451 |
| Diplometopon_zarudnyi      | :    | CCGAAG | AA   | AA | AA   | AA | AA   | AA | AA   | AA | AA   | AA | AA   | : 3451 |
| Amphisbaena_schmidti       | :    | CCGAAG | AA   | AA | AA   | AA | AA   | AA | AA   | AA | AA   | AA | AA   | : 3457 |
| Bipes_tridactylus          | :    | CCGAAG | AA   | AA | AA   | AA | AA   | AA | AA   | AA | AA   | AA | AA   | : 3448 |
| Bipes_canaliculatus        | :    | CCGAAG | AA   | AA | AA   | AA | AA   | AA | AA   | AA | AA   | AA | AA   | : 3448 |
| Bipes_biporus              | :    | CCGAAG | AA   | AA | AA   | AA | AA   | AA | AA   | AA | AA   | AA | AA   | : 3451 |
| Anolis_carolinensis        | :    | CCGAAG | AA   | AA | AA   | AA | AA   | AA | AA   | AA | AA   | AA | AA   | : 3474 |
| Ophisaurus_atnuatus        | :    | CCGAAG | AA   | AA | AA   | AA | AA   | AA | AA   | AA | AA   | AA | AA   | : 3476 |
| Varanus_salvator           | :    | CCGAAG | AA   | AA | AA   | AA | AA   | AA | AA   | AA | AA   | AA | AA   | : 3522 |
| Mertensiella_luschani      | :    | CCGAAG | AA   | AA | AA   | AA | AA   | AA | AA   | AA | AA   | AA | AA   | : 3487 |
| Xenopus_laevis             | :    | CCGAAG | AA   | AA | AA   | AA | AA   | AA | AA   | AA | AA   | AA | AA   | : 3481 |











|                            |   |     |      |     |      |     |      |     |      |     |      |     |      |     |      |
|----------------------------|---|-----|------|-----|------|-----|------|-----|------|-----|------|-----|------|-----|------|
|                            |   | *   | 4140 | *   | 4160 | *   | 4180 | *   | 4200 | *   | 4220 | *   | 4240 | *   |      |
| Bos_taurus                 | : | --- | ---  | --- | ---  | --- | ---  | --- | A    | --- | A    | --- | A    | --- | 3935 |
| Hylobates_lar              | : | --- | ---  | --- | ---  | --- | ---  | --- | G    | --- | G    | --- | G    | --- | 3941 |
| Lemur_catta                | : | --- | ---  | --- | ---  | --- | ---  | --- | A    | --- | A    | --- | A    | --- | 3941 |
| Nycticebus_coucang         | : | --- | ---  | --- | ---  | --- | ---  | --- | A    | --- | A    | --- | A    | --- | 3938 |
| Tarsius_bancanus           | : | --- | ---  | --- | ---  | --- | ---  | --- | A    | --- | A    | --- | A    | --- | 3938 |
| Gorilla_gorilla            | : | --- | ---  | --- | ---  | --- | ---  | --- | A    | --- | A    | --- | A    | --- | 3941 |
| Homo_sapiens               | : | --- | ---  | --- | ---  | --- | ---  | --- | A    | --- | A    | --- | A    | --- | 3938 |
| Papio_hamadryas            | : | --- | ---  | --- | ---  | --- | ---  | --- | A    | --- | A    | --- | A    | --- | 3941 |
| Cebus_albifrons            | : | --- | ---  | --- | ---  | --- | ---  | --- | A    | --- | A    | --- | A    | --- | 3947 |
| Macaca_sylvanus            | : | --- | ---  | --- | ---  | --- | ---  | --- | A    | --- | A    | --- | A    | --- | 3938 |
| Pongo_pygmaeus             | : | --- | ---  | --- | ---  | --- | ---  | --- | A    | --- | A    | --- | A    | --- | 3941 |
| Pan_paniscus               | : | --- | ---  | --- | ---  | --- | ---  | --- | A    | --- | A    | --- | A    | --- | 3941 |
| Agkistrodon_piscivorus     | : | --- | ---  | --- | ---  | --- | ---  | --- | A    | --- | A    | --- | A    | --- | 3939 |
| Pantherophis_guttatus      | : | --- | ---  | --- | ---  | --- | ---  | --- | A    | --- | A    | --- | A    | --- | 3933 |
| Dinodon_semicarinatus      | : | --- | ---  | --- | ---  | --- | ---  | --- | A    | --- | A    | --- | A    | --- | 3933 |
| Boa_constrictor            | : | --- | ---  | --- | ---  | --- | ---  | --- | A    | --- | A    | --- | A    | --- | 3942 |
| Python_regius              | : | --- | ---  | --- | ---  | --- | ---  | --- | A    | --- | A    | --- | A    | --- | 3945 |
| Acrochordus_granulatus     | : | --- | ---  | --- | ---  | --- | ---  | --- | A    | --- | A    | --- | A    | --- | 3942 |
| Cylindrophis_ruffus        | : | --- | ---  | --- | ---  | --- | ---  | --- | A    | --- | A    | --- | A    | --- | 3903 |
| Ovophis_okinavensis        | : | --- | ---  | --- | ---  | --- | ---  | --- | A    | --- | A    | --- | A    | --- | 3939 |
| Xenopeltis_unicolor        | : | --- | ---  | --- | ---  | --- | ---  | --- | A    | --- | A    | --- | A    | --- | 3945 |
| Typhlops_reticulatus       | : | --- | ---  | --- | ---  | --- | ---  | --- | A    | --- | A    | --- | A    | --- | 3863 |
| Leptotyphlops_dulcis       | : | --- | ---  | --- | ---  | --- | ---  | --- | A    | --- | A    | --- | A    | --- | 3879 |
| Caiman_crocodilus          | : | --- | ---  | --- | ---  | --- | ---  | --- | A    | --- | A    | --- | A    | --- | 3947 |
| Alligator_sinensis         | : | --- | ---  | --- | ---  | --- | ---  | --- | A    | --- | A    | --- | A    | --- | 3965 |
| Alligator_mississippiensis | : | --- | ---  | --- | ---  | --- | ---  | --- | A    | --- | A    | --- | A    | --- | 3917 |
| Gavialis_gangeticus        | : | --- | ---  | --- | ---  | --- | ---  | --- | A    | --- | A    | --- | A    | --- | 3950 |
| Crocodylus_moreletii       | : | --- | ---  | --- | ---  | --- | ---  | --- | A    | --- | A    | --- | A    | --- | 3926 |
| Dogania_subplana           | : | --- | ---  | --- | ---  | --- | ---  | --- | A    | --- | A    | --- | A    | --- | 3902 |
| Pelomedusa_subrufa         | : | --- | ---  | --- | ---  | --- | ---  | --- | A    | --- | A    | --- | A    | --- | 3920 |
| Chrysemys_picta            | : | --- | ---  | --- | ---  | --- | ---  | --- | A    | --- | A    | --- | A    | --- | 3938 |
| Chelonia_mydas             | : | --- | ---  | --- | ---  | --- | ---  | --- | A    | --- | A    | --- | A    | --- | 3935 |
| Tinamus_major              | : | --- | ---  | --- | ---  | --- | ---  | --- | A    | --- | A    | --- | A    | --- | 3920 |
| Smithornis_sharpei         | : | --- | ---  | --- | ---  | --- | ---  | --- | A    | --- | A    | --- | A    | --- | 3917 |
| Corvus_frugilegus          | : | --- | ---  | --- | ---  | --- | ---  | --- | A    | --- | A    | --- | A    | --- | 3917 |
| Vidua_chalybeata           | : | --- | ---  | --- | ---  | --- | ---  | --- | A    | --- | A    | --- | A    | --- | 3917 |
| Buteo_buteo                | : | --- | ---  | --- | ---  | --- | ---  | --- | A    | --- | A    | --- | A    | --- | 3917 |
| Falco_peregrinus           | : | --- | ---  | --- | ---  | --- | ---  | --- | A    | --- | A    | --- | A    | --- | 3917 |
| Dromaius_novaehollandiae   | : | --- | ---  | --- | ---  | --- | ---  | --- | A    | --- | A    | --- | A    | --- | 3920 |
| Struthio_camelus           | : | --- | ---  | --- | ---  | --- | ---  | --- | A    | --- | A    | --- | A    | --- | 3923 |
| Apteryx_haastii            | : | --- | ---  | --- | ---  | --- | ---  | --- | A    | --- | A    | --- | A    | --- | 3920 |
| Rhea_americana             | : | --- | ---  | --- | ---  | --- | ---  | --- | A    | --- | A    | --- | A    | --- | 3923 |
| Gallus_gallus              | : | --- | ---  | --- | ---  | --- | ---  | --- | A    | --- | A    | --- | A    | --- | 3914 |
| Ciconia_ciconia            | : | --- | ---  | --- | ---  | --- | ---  | --- | A    | --- | A    | --- | A    | --- | 3917 |
| Ciconia_boyciana           | : | --- | ---  | --- | ---  | --- | ---  | --- | A    | --- | A    | --- | A    | --- | 3917 |
| Iguana_iguana              | : | --- | ---  | --- | ---  | --- | ---  | --- | A    | --- | A    | --- | A    | --- | 3917 |
| Eumeces_egregius           | : | --- | ---  | --- | ---  | --- | ---  | --- | A    | --- | A    | --- | A    | --- | 3920 |
| Sphenodon_punctatus        | : | --- | ---  | --- | ---  | --- | ---  | --- | A    | --- | A    | --- | A    | --- | 3917 |
| Sceloporus_occidentalis    | : | --- | ---  | --- | ---  | --- | ---  | --- | A    | --- | A    | --- | A    | --- | 3917 |
| Cordylus_warreni           | : | --- | ---  | --- | ---  | --- | ---  | --- | A    | --- | A    | --- | A    | --- | 3929 |
| Abronia_graminea           | : | --- | ---  | --- | ---  | --- | ---  | --- | A    | --- | A    | --- | A    | --- | 3914 |
| Shinisaurus_crocodilurus   | : | --- | ---  | --- | ---  | --- | ---  | --- | A    | --- | A    | --- | A    | --- | 3914 |
| Varanus_komodoensis        | : | --- | ---  | --- | ---  | --- | ---  | --- | A    | --- | A    | --- | A    | --- | 3965 |
| Rhineura_floridana         | : | --- | ---  | --- | ---  | --- | ---  | --- | A    | --- | A    | --- | A    | --- | 3911 |
| Geocalamus_acutus          | : | --- | ---  | --- | ---  | --- | ---  | --- | A    | --- | A    | --- | A    | --- | 3896 |
| Diplometopon_zarudnyi      | : | --- | ---  | --- | ---  | --- | ---  | --- | A    | --- | A    | --- | A    | --- | 3896 |
| Amphisbaena_schmidti       | : | --- | ---  | --- | ---  | --- | ---  | --- | A    | --- | A    | --- | A    | --- | 3905 |
| Bipes_tridactylus          | : | --- | ---  | --- | ---  | --- | ---  | --- | A    | --- | A    | --- | A    | --- | 3893 |
| Bipes_canaliculatus        | : | --- | ---  | --- | ---  | --- | ---  | --- | A    | --- | A    | --- | A    | --- | 3893 |
| Bipes_biporus              | : | --- | ---  | --- | ---  | --- | ---  | --- | A    | --- | A    | --- | A    | --- | 3896 |
| Anolis_carolinensis        | : | --- | ---  | --- | ---  | --- | ---  | --- | A    | --- | A    | --- | A    | --- | 3916 |
| Ophisaurus_atnuntius       | : | --- | ---  | --- | ---  | --- | ---  | --- | A    | --- | A    | --- | A    | --- | 3915 |
| Varanus_salvator           | : | --- | ---  | --- | ---  | --- | ---  | --- | A    | --- | A    | --- | A    | --- | 3958 |
| Mertensiella_luschani      | : | --- | ---  | --- | ---  | --- | ---  | --- | A    | --- | A    | --- | A    | --- | 3932 |
| Xenopus_laevis             | : | --- | ---  | --- | ---  | --- | ---  | --- | A    | --- | A    | --- | A    | --- | 3923 |

```

4260      *      4280      *      4300      *      4320      *      4340      *      4360      *      4380
Bos_taurus      : GGCCTCCGCCCCAAGAAACATTCAGAGGAAATTTGGGCTCCGGGAACTGGTAAACCCAAACCCACCGGCCATTCAGCAAAACACACCGGACAAACACAGCCATT : 4068
Hylobates_lar  : GGCCTCCGCCCCAAGAAACATTCAGAGGAAATTTGGGCTCCGGGAACTGGTAAACCCAAACCCACCGGCCATTCAGCAAAACACACCGGACAAACACAGCCATT : 4074
Lemur_catta    : TGACCTCCCAACCCATCCAAACATTCAGAGGAAATTTGGGCTCCGGGAACTGGTAAACCCAAACCCACCGGCCATTCAGCAAAACACACCGGACAAACACAGCCATT : 4074
Nycticebus_coucang : TGACCTCCCAACCCATCCAAACATTCAGAGGAAATTTGGGCTCCGGGAACTGGTAAACCCAAACCCACCGGCCATTCAGCAAAACACACCGGACAAACACAGCCATT : 4071
Tarsius_bancanus : TGACCTCCCAACCCATCCAAACATTCAGAGGAAATTTGGGCTCCGGGAACTGGTAAACCCAAACCCACCGGCCATTCAGCAAAACACACCGGACAAACACAGCCATT : 4071
Gorilla_gorilla : TGACCTCCCAACCCATCCAAACATTCAGAGGAAATTTGGGCTCCGGGAACTGGTAAACCCAAACCCACCGGCCATTCAGCAAAACACACCGGACAAACACAGCCATT : 4074
Homo_sapiens   : GGCCTCCCAACCCATCCAAACATTCAGAGGAAATTTGGGCTCCGGGAACTGGTAAACCCAAACCCACCGGCCATTCAGCAAAACACACCGGACAAACACAGCCATT : 4071
Papio_hamadryas : GGCCTCCCAACCCATCCAAACATTCAGAGGAAATTTGGGCTCCGGGAACTGGTAAACCCAAACCCACCGGCCATTCAGCAAAACACACCGGACAAACACAGCCATT : 4074
Cebus_albifrons : TGACCTCCCAACCCATCCAAACATTCAGAGGAAATTTGGGCTCCGGGAACTGGTAAACCCAAACCCACCGGCCATTCAGCAAAACACACCGGACAAACACAGCCATT : 4080
Macaca_sylvanus : TGACCTCCCAACCCATCCAAACATTCAGAGGAAATTTGGGCTCCGGGAACTGGTAAACCCAAACCCACCGGCCATTCAGCAAAACACACCGGACAAACACAGCCATT : 4071
Pongo_pygmaeus : GGCCTCCCAACCCATCCAAACATTCAGAGGAAATTTGGGCTCCGGGAACTGGTAAACCCAAACCCACCGGCCATTCAGCAAAACACACCGGACAAACACAGCCATT : 4074
Pan_paniscus   : GGCCTCCCAACCCATCCAAACATTCAGAGGAAATTTGGGCTCCGGGAACTGGTAAACCCAAACCCACCGGCCATTCAGCAAAACACACCGGACAAACACAGCCATT : 4074
Agkistrodon_piscivorus : -CTAATCCGAGAGGAAACAAACATTCAGAGGAAATTTGGGCTCCGGGAACTGGTAAACCCAAACCCACCGGCCATTCAGCAAAACACACCGGACAAACACAGCCATT : 4071
Pantherophis_guttatus : -CCCTAACCAGAGGAAACAAACATTCAGAGGAAATTTGGGCTCCGGGAACTGGTAAACCCAAACCCACCGGCCATTCAGCAAAACACACCGGACAAACACAGCCATT : 4065
Dinodon_semicarinatus : -AATTCGCGAGAGGAAACAAACATTCAGAGGAAATTTGGGCTCCGGGAACTGGTAAACCCAAACCCACCGGCCATTCAGCAAAACACACCGGACAAACACAGCCATT : 4065
Boa_constrictor : -CAATTCGCGAGAGGAAACAAACATTCAGAGGAAATTTGGGCTCCGGGAACTGGTAAACCCAAACCCACCGGCCATTCAGCAAAACACACCGGACAAACACAGCCATT : 4074
Python_regius  : -CAATTCGCGAGAGGAAACAAACATTCAGAGGAAATTTGGGCTCCGGGAACTGGTAAACCCAAACCCACCGGCCATTCAGCAAAACACACCGGACAAACACAGCCATT : 4077
Acrochordus_granulatus : -CAATTCGCGAGAGGAAACAAACATTCAGAGGAAATTTGGGCTCCGGGAACTGGTAAACCCAAACCCACCGGCCATTCAGCAAAACACACCGGACAAACACAGCCATT : 4074
Cylindrophis_ruffus : -TAACTCCGAGAGGAAACAAACATTCAGAGGAAATTTGGGCTCCGGGAACTGGTAAACCCAAACCCACCGGCCATTCAGCAAAACACACCGGACAAACACAGCCATT : 4035
Ovophis_okinavensis : -CCTAACCAGAGGAAACAAACATTCAGAGGAAATTTGGGCTCCGGGAACTGGTAAACCCAAACCCACCGGCCATTCAGCAAAACACACCGGACAAACACAGCCATT : 4071
Xenopeltis_unicolor : -CAATTCGCGAGAGGAAACAAACATTCAGAGGAAATTTGGGCTCCGGGAACTGGTAAACCCAAACCCACCGGCCATTCAGCAAAACACACCGGACAAACACAGCCATT : 4077
Typhlops_reticulatus : AGCCTCCCAACCCATCCAAACATTCAGAGGAAATTTGGGCTCCGGGAACTGGTAAACCCAAACCCACCGGCCATTCAGCAAAACACACCGGACAAACACAGCCATT : 3996
Leptotyphlops_dulcis : AGCCTCCCAACCCATCCAAACATTCAGAGGAAATTTGGGCTCCGGGAACTGGTAAACCCAAACCCACCGGCCATTCAGCAAAACACACCGGACAAACACAGCCATT : 4012
Caiman_crocodilus : TGACCTCCCAACCCATCCAAACATTCAGAGGAAATTTGGGCTCCGGGAACTGGTAAACCCAAACCCACCGGCCATTCAGCAAAACACACCGGACAAACACAGCCATT : 4080
Alligator_sinensis : TGACCTCCCAACCCATCCAAACATTCAGAGGAAATTTGGGCTCCGGGAACTGGTAAACCCAAACCCACCGGCCATTCAGCAAAACACACCGGACAAACACAGCCATT : 4098
Alligator_mississippiensis : TGACCTCCCAACCCATCCAAACATTCAGAGGAAATTTGGGCTCCGGGAACTGGTAAACCCAAACCCACCGGCCATTCAGCAAAACACACCGGACAAACACAGCCATT : 4050
Gavialis_gangeticus : TGACCTCCCAACCCATCCAAACATTCAGAGGAAATTTGGGCTCCGGGAACTGGTAAACCCAAACCCACCGGCCATTCAGCAAAACACACCGGACAAACACAGCCATT : 4083
Crocodylus_moreletii : TGACCTCCCAACCCATCCAAACATTCAGAGGAAATTTGGGCTCCGGGAACTGGTAAACCCAAACCCACCGGCCATTCAGCAAAACACACCGGACAAACACAGCCATT : 4059
Dogania_subplana : GGCCTCCCAACCCATCCAAACATTCAGAGGAAATTTGGGCTCCGGGAACTGGTAAACCCAAACCCACCGGCCATTCAGCAAAACACACCGGACAAACACAGCCATT : 4035
Pelomedusa_subrufa : GGCCTCCCAACCCATCCAAACATTCAGAGGAAATTTGGGCTCCGGGAACTGGTAAACCCAAACCCACCGGCCATTCAGCAAAACACACCGGACAAACACAGCCATT : 4053
Chrysemys_picta : TGACCTCCCAACCCATCCAAACATTCAGAGGAAATTTGGGCTCCGGGAACTGGTAAACCCAAACCCACCGGCCATTCAGCAAAACACACCGGACAAACACAGCCATT : 4071
Chelonia_mydas : GGCCTCCCAACCCATCCAAACATTCAGAGGAAATTTGGGCTCCGGGAACTGGTAAACCCAAACCCACCGGCCATTCAGCAAAACACACCGGACAAACACAGCCATT : 4068
Tinanus_major : TGACCTCCCAACCCATCCAAACATTCAGAGGAAATTTGGGCTCCGGGAACTGGTAAACCCAAACCCACCGGCCATTCAGCAAAACACACCGGACAAACACAGCCATT : 4053
Smithornis_sharpei : TGACCTCCCAACCCATCCAAACATTCAGAGGAAATTTGGGCTCCGGGAACTGGTAAACCCAAACCCACCGGCCATTCAGCAAAACACACCGGACAAACACAGCCATT : 4050
Corvus_frugilegus : GGCCTCCCAACCCATCCAAACATTCAGAGGAAATTTGGGCTCCGGGAACTGGTAAACCCAAACCCACCGGCCATTCAGCAAAACACACCGGACAAACACAGCCATT : 4050
Vidua_chalybeata : GGCCTCCCAACCCATCCAAACATTCAGAGGAAATTTGGGCTCCGGGAACTGGTAAACCCAAACCCACCGGCCATTCAGCAAAACACACCGGACAAACACAGCCATT : 4050
Buteo_buteo    : TGACCTCCCAACCCATCCAAACATTCAGAGGAAATTTGGGCTCCGGGAACTGGTAAACCCAAACCCACCGGCCATTCAGCAAAACACACCGGACAAACACAGCCATT : 4050
Falco_peregrinus : GGCCTCCCAACCCATCCAAACATTCAGAGGAAATTTGGGCTCCGGGAACTGGTAAACCCAAACCCACCGGCCATTCAGCAAAACACACCGGACAAACACAGCCATT : 4050
Dromaius_novaeollandiae : GGCCTCCCAACCCATCCAAACATTCAGAGGAAATTTGGGCTCCGGGAACTGGTAAACCCAAACCCACCGGCCATTCAGCAAAACACACCGGACAAACACAGCCATT : 4053
Struthio_camelus : GGCCTCCCAACCCATCCAAACATTCAGAGGAAATTTGGGCTCCGGGAACTGGTAAACCCAAACCCACCGGCCATTCAGCAAAACACACCGGACAAACACAGCCATT : 4056
Apteryx_haastii : GGCCTCCCAACCCATCCAAACATTCAGAGGAAATTTGGGCTCCGGGAACTGGTAAACCCAAACCCACCGGCCATTCAGCAAAACACACCGGACAAACACAGCCATT : 4053
Rhea_americanana : GGCCTCCCAACCCATCCAAACATTCAGAGGAAATTTGGGCTCCGGGAACTGGTAAACCCAAACCCACCGGCCATTCAGCAAAACACACCGGACAAACACAGCCATT : 4056
Gallus_gallus  : GGCCTCCCAACCCATCCAAACATTCAGAGGAAATTTGGGCTCCGGGAACTGGTAAACCCAAACCCACCGGCCATTCAGCAAAACACACCGGACAAACACAGCCATT : 4047
Ciconia_ciconia : TGACCTCCCAACCCATCCAAACATTCAGAGGAAATTTGGGCTCCGGGAACTGGTAAACCCAAACCCACCGGCCATTCAGCAAAACACACCGGACAAACACAGCCATT : 4050
Ciconia_boyciiana : TGACCTCCCAACCCATCCAAACATTCAGAGGAAATTTGGGCTCCGGGAACTGGTAAACCCAAACCCACCGGCCATTCAGCAAAACACACCGGACAAACACAGCCATT : 4050
Iguana_iguana  : GGCCTCCCAACCCATCCAAACATTCAGAGGAAATTTGGGCTCCGGGAACTGGTAAACCCAAACCCACCGGCCATTCAGCAAAACACACCGGACAAACACAGCCATT : 4050
Fumeces_egregius : TGACCTCCCAACCCATCCAAACATTCAGAGGAAATTTGGGCTCCGGGAACTGGTAAACCCAAACCCACCGGCCATTCAGCAAAACACACCGGACAAACACAGCCATT : 4053
Sphenodon_punctatus : TGACCTCCCAACCCATCCAAACATTCAGAGGAAATTTGGGCTCCGGGAACTGGTAAACCCAAACCCACCGGCCATTCAGCAAAACACACCGGACAAACACAGCCATT : 4050
Sceloporus_occidentalis : GGCCTCCCAACCCATCCAAACATTCAGAGGAAATTTGGGCTCCGGGAACTGGTAAACCCAAACCCACCGGCCATTCAGCAAAACACACCGGACAAACACAGCCATT : 4050
Cordylus_warreni : GGCCTCCCAACCCATCCAAACATTCAGAGGAAATTTGGGCTCCGGGAACTGGTAAACCCAAACCCACCGGCCATTCAGCAAAACACACCGGACAAACACAGCCATT : 4062
Abronia_graminea : TGACCTCCCAACCCATCCAAACATTCAGAGGAAATTTGGGCTCCGGGAACTGGTAAACCCAAACCCACCGGCCATTCAGCAAAACACACCGGACAAACACAGCCATT : 4047
Shinisaurus_crocodilurus : GGCCTCCCAACCCATCCAAACATTCAGAGGAAATTTGGGCTCCGGGAACTGGTAAACCCAAACCCACCGGCCATTCAGCAAAACACACCGGACAAACACAGCCATT : 4047
Varanus_komodoensis : GGCCTCCCAACCCATCCAAACATTCAGAGGAAATTTGGGCTCCGGGAACTGGTAAACCCAAACCCACCGGCCATTCAGCAAAACACACCGGACAAACACAGCCATT : 4098
Rhineura_floridana : GGCCTCCCAACCCATCCAAACATTCAGAGGAAATTTGGGCTCCGGGAACTGGTAAACCCAAACCCACCGGCCATTCAGCAAAACACACCGGACAAACACAGCCATT : 4044
Geocalamus_acutus : GGCCTCCCAACCCATCCAAACATTCAGAGGAAATTTGGGCTCCGGGAACTGGTAAACCCAAACCCACCGGCCATTCAGCAAAACACACCGGACAAACACAGCCATT : 4029
Diplometopon_zarudnyi : TGACCTCCCAACCCATCCAAACATTCAGAGGAAATTTGGGCTCCGGGAACTGGTAAACCCAAACCCACCGGCCATTCAGCAAAACACACCGGACAAACACAGCCATT : 4029
Amphisbaena_schmidti : TGACCTCCCAACCCATCCAAACATTCAGAGGAAATTTGGGCTCCGGGAACTGGTAAACCCAAACCCACCGGCCATTCAGCAAAACACACCGGACAAACACAGCCATT : 4038
Bipes_tridactylus : TGACCTCCCAACCCATCCAAACATTCAGAGGAAATTTGGGCTCCGGGAACTGGTAAACCCAAACCCACCGGCCATTCAGCAAAACACACCGGACAAACACAGCCATT : 4026
Bipes_canaliculatus : TGACCTCCCAACCCATCCAAACATTCAGAGGAAATTTGGGCTCCGGGAACTGGTAAACCCAAACCCACCGGCCATTCAGCAAAACACACCGGACAAACACAGCCATT : 4026
Bipes_biporus  : GGCCTCCCAACCCATCCAAACATTCAGAGGAAATTTGGGCTCCGGGAACTGGTAAACCCAAACCCACCGGCCATTCAGCAAAACACACCGGACAAACACAGCCATT : 4029
Anolis_carolinensis : GGCCTCCCAACCCATCCAAACATTCAGAGGAAATTTGGGCTCCGGGAACTGGTAAACCCAAACCCACCGGCCATTCAGCAAAACACACCGGACAAACACAGCCATT : 4049
Ophisaurus_atnuatus : GGCCTCCCAACCCATCCAAACATTCAGAGGAAATTTGGGCTCCGGGAACTGGTAAACCCAAACCCACCGGCCATTCAGCAAAACACACCGGACAAACACAGCCATT : 4048
Varanus_salvator : GGCCTCCCAACCCATCCAAACATTCAGAGGAAATTTGGGCTCCGGGAACTGGTAAACCCAAACCCACCGGCCATTCAGCAAAACACACCGGACAAACACAGCCATT : 4091
Mertensiella_luschani : TGACCTCCCAACCCATCCAAACATTCAGAGGAAATTTGGGCTCCGGGAACTGGTAAACCCAAACCCACCGGCCATTCAGCAAAACACACCGGACAAACACAGCCATT : 4065
Xenopus_laevis : GGCCTCCCAACCCATCCAAACATTCAGAGGAAATTTGGGCTCCGGGAACTGGTAAACCCAAACCCACCGGCCATTCAGCAAAACACACCGGACAAACACAGCCATT : 4056

```

|                            | * | 4400 | *  | 4420 | *  | 4440 | *  | 4460 | *   | 4480 | *   | 4500 | *  | 4520 |      |
|----------------------------|---|------|----|------|----|------|----|------|-----|------|-----|------|----|------|------|
| Bos_taurus                 | : | CC   | AG | TC   | CC | AT   | TC | GC   | GAG | GC   | GAA | T    | CG | GC   | 4201 |
| Hylobates_lar              | : | CA   | AG | AG   | T  | AC   | AT | GC   | GAG | GC   | AAA | CT   | CG | GC   | 4207 |
| Lemur_catta                | : | TC   | CC | CG   | TC | CC   | AT | TC   | GC  | GAG  | GC  | AAA  | CT | CG   | 4207 |
| Nycticebus_coucang         | : | TC   | CC | CG   | TC | CC   | AT | TC   | GC  | GAG  | GC  | AAA  | CT | CG   | 4204 |
| Tarsius_bancanus           | : | TC   | CC | CG   | TC | CC   | AT | TC   | GC  | GAG  | GC  | AAA  | CT | CG   | 4204 |
| Gorilla_gorilla            | : | TC   | CC | CG   | TC | CC   | AT | TC   | GC  | GAG  | GC  | AAA  | CT | CG   | 4207 |
| Homo_sapiens               | : | TC   | CC | CG   | TC | CC   | AT | TC   | GC  | GAG  | GC  | AAA  | CT | CG   | 4204 |
| Papio_hamadryas            | : | TC   | CC | CG   | TC | CC   | AT | TC   | GC  | GAG  | GC  | AAA  | CT | CG   | 4207 |
| Cebus_albifrons            | : | TC   | CC | CG   | TC | CC   | AT | TC   | GC  | GAG  | GC  | AAA  | CT | CG   | 4213 |
| Macaca_sylvanus            | : | TC   | CC | CG   | TC | CC   | AT | TC   | GC  | GAG  | GC  | AAA  | CT | CG   | 4204 |
| Pongo_pygmaeus             | : | TC   | CC | CG   | TC | CC   | AT | TC   | GC  | GAG  | GC  | AAA  | CT | CG   | 4207 |
| Pan_paniscus               | : | TC   | CC | CG   | TC | CC   | AT | TC   | GC  | GAG  | GC  | AAA  | CT | CG   | 4207 |
| Agkistrodon_piscivorus     | : | TC   | CC | CG   | TC | CC   | AT | TC   | GC  | GAG  | GC  | AAA  | CT | CG   | 4204 |
| Pantherophis_guttatus      | : | TC   | CC | CG   | TC | CC   | AT | TC   | GC  | GAG  | GC  | AAA  | CT | CG   | 4198 |
| Dinodon_semicarinatus      | : | TC   | CC | CG   | TC | CC   | AT | TC   | GC  | GAG  | GC  | AAA  | CT | CG   | 4198 |
| Boa_constrictor            | : | TC   | CC | CG   | TC | CC   | AT | TC   | GC  | GAG  | GC  | AAA  | CT | CG   | 4207 |
| Python_regius              | : | TC   | CC | CG   | TC | CC   | AT | TC   | GC  | GAG  | GC  | AAA  | CT | CG   | 4210 |
| Acrochordus_granulatus     | : | TC   | CC | CG   | TC | CC   | AT | TC   | GC  | GAG  | GC  | AAA  | CT | CG   | 4207 |
| Cylindrophis_ruffus        | : | TC   | CC | CG   | TC | CC   | AT | TC   | GC  | GAG  | GC  | AAA  | CT | CG   | 4168 |
| Ovophis_okinavensis        | : | TC   | CC | CG   | TC | CC   | AT | TC   | GC  | GAG  | GC  | AAA  | CT | CG   | 4204 |
| Xenopeltis_unicolor        | : | TC   | CC | CG   | TC | CC   | AT | TC   | GC  | GAG  | GC  | AAA  | CT | CG   | 4210 |
| Typhlops_reticulatus       | : | TC   | CC | CG   | TC | CC   | AT | TC   | GC  | GAG  | GC  | AAA  | CT | CG   | 4129 |
| Leptotyphlops_dulcis       | : | TC   | CC | CG   | TC | CC   | AT | TC   | GC  | GAG  | GC  | AAA  | CT | CG   | 4145 |
| Caiman_crocodilus          | : | TC   | CC | CG   | TC | CC   | AT | TC   | GC  | GAG  | GC  | AAA  | CT | CG   | 4213 |
| Alligator_sinensis         | : | TC   | CC | CG   | TC | CC   | AT | TC   | GC  | GAG  | GC  | AAA  | CT | CG   | 4231 |
| Alligator_mississippiensis | : | TC   | CC | CG   | TC | CC   | AT | TC   | GC  | GAG  | GC  | AAA  | CT | CG   | 4183 |
| Gavialis_gangeticus        | : | TC   | CC | CG   | TC | CC   | AT | TC   | GC  | GAG  | GC  | AAA  | CT | CG   | 4216 |
| Crocodylus_moreletii       | : | TC   | CC | CG   | TC | CC   | AT | TC   | GC  | GAG  | GC  | AAA  | CT | CG   | 4192 |
| Dogania_subplana           | : | TC   | CC | CG   | TC | CC   | AT | TC   | GC  | GAG  | GC  | AAA  | CT | CG   | 4168 |
| Pelomedusa_subrufa         | : | TC   | CC | CG   | TC | CC   | AT | TC   | GC  | GAG  | GC  | AAA  | CT | CG   | 4186 |
| Chrysemys_picta            | : | TC   | CC | CG   | TC | CC   | AT | TC   | GC  | GAG  | GC  | AAA  | CT | CG   | 4204 |
| Chelonia_mydas             | : | TC   | CC | CG   | TC | CC   | AT | TC   | GC  | GAG  | GC  | AAA  | CT | CG   | 4201 |
| Tinamus_major              | : | TC   | CC | CG   | TC | CC   | AT | TC   | GC  | GAG  | GC  | AAA  | CT | CG   | 4186 |
| Smithornis_sharpei         | : | TC   | CC | CG   | TC | CC   | AT | TC   | GC  | GAG  | GC  | AAA  | CT | CG   | 4183 |
| Corvus_frugilegus          | : | TC   | CC | CG   | TC | CC   | AT | TC   | GC  | GAG  | GC  | AAA  | CT | CG   | 4183 |
| Vidua_chalybeata           | : | TC   | CC | CG   | TC | CC   | AT | TC   | GC  | GAG  | GC  | AAA  | CT | CG   | 4183 |
| Buteo_buteo                | : | TC   | CC | CG   | TC | CC   | AT | TC   | GC  | GAG  | GC  | AAA  | CT | CG   | 4183 |
| Falco_peregrinus           | : | TC   | CC | CG   | TC | CC   | AT | TC   | GC  | GAG  | GC  | AAA  | CT | CG   | 4183 |
| Dromaius_novaehollandiae   | : | TC   | CC | CG   | TC | CC   | AT | TC   | GC  | GAG  | GC  | AAA  | CT | CG   | 4186 |
| Struthio_camelus           | : | TC   | CC | CG   | TC | CC   | AT | TC   | GC  | GAG  | GC  | AAA  | CT | CG   | 4189 |
| Apteryx_haastii            | : | TC   | CC | CG   | TC | CC   | AT | TC   | GC  | GAG  | GC  | AAA  | CT | CG   | 4186 |
| Rhea_americanus            | : | TC   | CC | CG   | TC | CC   | AT | TC   | GC  | GAG  | GC  | AAA  | CT | CG   | 4189 |
| Gallus_gallus              | : | TC   | CC | CG   | TC | CC   | AT | TC   | GC  | GAG  | GC  | AAA  | CT | CG   | 4180 |
| Ciconia_ciconia            | : | TC   | CC | CG   | TC | CC   | AT | TC   | GC  | GAG  | GC  | AAA  | CT | CG   | 4183 |
| Ciconia_boycciana          | : | TC   | CC | CG   | TC | CC   | AT | TC   | GC  | GAG  | GC  | AAA  | CT | CG   | 4183 |
| Iguana_iguana              | : | TC   | CC | CG   | TC | CC   | AT | TC   | GC  | GAG  | GC  | AAA  | CT | CG   | 4183 |
| Eumeces_egregius           | : | TC   | CC | CG   | TC | CC   | AT | TC   | GC  | GAG  | GC  | AAA  | CT | CG   | 4186 |
| Sphenodon_punctatus        | : | TC   | CC | CG   | TC | CC   | AT | TC   | GC  | GAG  | GC  | AAA  | CT | CG   | 4183 |
| Sceloporus_occidentalis    | : | TC   | CC | CG   | TC | CC   | AT | TC   | GC  | GAG  | GC  | AAA  | CT | CG   | 4183 |
| Cordylus_warreni           | : | TC   | CC | CG   | TC | CC   | AT | TC   | GC  | GAG  | GC  | AAA  | CT | CG   | 4195 |
| Abronia_graminea           | : | TC   | CC | CG   | TC | CC   | AT | TC   | GC  | GAG  | GC  | AAA  | CT | CG   | 4180 |
| Shinisaurus_crocodilurus   | : | TC   | CC | CG   | TC | CC   | AT | TC   | GC  | GAG  | GC  | AAA  | CT | CG   | 4180 |
| Varanus_komodoensis        | : | TC   | CC | CG   | TC | CC   | AT | TC   | GC  | GAG  | GC  | AAA  | CT | CG   | 4231 |
| Rhineura_floridana         | : | TC   | CC | CG   | TC | CC   | AT | TC   | GC  | GAG  | GC  | AAA  | CT | CG   | 4177 |
| Geocalamus_acutus          | : | TC   | CC | CG   | TC | CC   | AT | TC   | GC  | GAG  | GC  | AAA  | CT | CG   | 4162 |
| Diplometopon_zarudnyi      | : | TC   | CC | CG   | TC | CC   | AT | TC   | GC  | GAG  | GC  | AAA  | CT | CG   | 4162 |
| Amphisbaena_schmidti       | : | TC   | CC | CG   | TC | CC   | AT | TC   | GC  | GAG  | GC  | AAA  | CT | CG   | 4171 |
| Bipes_tridactylus          | : | TC   | CC | CG   | TC | CC   | AT | TC   | GC  | GAG  | GC  | AAA  | CT | CG   | 4159 |
| Bipes_canaliculatus        | : | TC   | CC | CG   | TC | CC   | AT | TC   | GC  | GAG  | GC  | AAA  | CT | CG   | 4159 |
| Bipes_biporus              | : | TC   | CC | CG   | TC | CC   | AT | TC   | GC  | GAG  | GC  | AAA  | CT | CG   | 4162 |
| Anolis_carolinensis        | : | TC   | CC | CG   | TC | CC   | AT | TC   | GC  | GAG  | GC  | AAA  | CT | CG   | 4182 |
| Ophisaurus_atnuatus        | : | TC   | CC | CG   | TC | CC   | AT | TC   | GC  | GAG  | GC  | AAA  | CT | CG   | 4181 |
| Varanus_salvator           | : | TC   | CC | CG   | TC | CC   | AT | TC   | GC  | GAG  | GC  | AAA  | CT | CG   | 4224 |
| Mertensiella_luschani      | : | TC   | CC | CG   | TC | CC   | AT | TC   | GC  | GAG  | GC  | AAA  | CT | CG   | 4198 |
| Xenopus_laevis             | : | TC   | CC | CG   | TC | CC   | AT | TC   | GC  | GAG  | GC  | AAA  | CT | CG   | 4189 |











|                            | 5060 | *       | 5080   | *      | 5100  | *     | 5120  | *      | 5140  | *     | 5160  | *     | 5180  |      |
|----------------------------|------|---------|--------|--------|-------|-------|-------|--------|-------|-------|-------|-------|-------|------|
| Bos_taurus                 | :    | AACAAAC | TGGGGG | AAAGCC | AGCC  | CTCC  | CAAC  | AAATCC | CAAG  | CAAA  | AAAG  | CAAT  | CGG   | 4866 |
| Hylobates_lar              | :    | AATAAAC | TGGGGG | CACTAG | CCGC  | CTAC  | TAACA | CCCA   | CAAG  | CAAC  | CAAG  | CAAT  | CGG   | 4872 |
| Lemur_catta                | :    | AATAAAC | TGGGGG | CACTAG | CCGC  | CTAC  | TAACA | CCCA   | CAAG  | CAAC  | CAAG  | CAAT  | CGG   | 4872 |
| Nycticebus_coucang         | :    | AACAAAC | TGGGGG | CACTAG | CCGC  | CTAC  | TAACA | CCCA   | CAAG  | CAAC  | CAAG  | CAAT  | CGG   | 4869 |
| Tarsius_bancanus           | :    | AATAAAC | TGGGGG | CACTAG | CCGC  | CTAC  | TAACA | CCCA   | CAAG  | CAAC  | CAAG  | CAAT  | CGG   | 4869 |
| Gorilla_gorilla            | :    | AATAAAC | TGGGGG | CACTAG | CCGC  | CTAC  | TAACA | CCCA   | CAAG  | CAAC  | CAAG  | CAAT  | CGG   | 4872 |
| Homo_sapiens               | :    | AACAAAC | TGGGGG | CACTAG | CCGC  | CTAC  | TAACA | CCCA   | CAAG  | CAAC  | CAAG  | CAAT  | CGG   | 4869 |
| Papio_hamadryas            | :    | AACAAAC | TGGGGG | CACTAG | CCGC  | CTAC  | TAACA | CCCA   | CAAG  | CAAC  | CAAG  | CAAT  | CGG   | 4872 |
| Cebus_albifrons            | :    | AATAAAC | TGGGGG | CACTAG | CCGC  | CTAC  | TAACA | CCCA   | CAAG  | CAAC  | CAAG  | CAAT  | CGG   | 4878 |
| Macaca_sylvanus            | :    | AATAAAC | TGGGGG | CACTAG | CCGC  | CTAC  | TAACA | CCCA   | CAAG  | CAAC  | CAAG  | CAAT  | CGG   | 4869 |
| Pongo_pygmaeus             | :    | AACAAAC | TGGGGG | CACTAG | CCGC  | CTAC  | TAACA | CCCA   | CAAG  | CAAC  | CAAG  | CAAT  | CGG   | 4872 |
| Pan_paniscus               | :    | AACAAAC | TGGGGG | CACTAG | CCGC  | CTAC  | TAACA | CCCA   | CAAG  | CAAC  | CAAG  | CAAT  | CGG   | 4872 |
| Agkistrodon_piscivorus     | :    | AATAAAC | TGGGGG | CACTAG | CCGC  | CTAC  | TAACA | CCCA   | CAAG  | CAAC  | CAAG  | CAAT  | CGG   | 4869 |
| Pantherophis_guttatus      | :    | AACAAAC | TGGGGG | CACTAG | CCGC  | CTAC  | TAACA | CCCA   | CAAG  | CAAC  | CAAG  | CAAT  | CGG   | 4863 |
| Dinodon_semicarinatus      | :    | AATAAAC | TGGGGG | CACTAG | CCGC  | CTAC  | TAACA | CCCA   | CAAG  | CAAC  | CAAG  | CAAT  | CGG   | 4863 |
| Boa_constrictor            | :    | AACAAAC | TGGGGG | CACTAG | CCGC  | CTAC  | TAACA | CCCA   | CAAG  | CAAC  | CAAG  | CAAT  | CGG   | 4872 |
| Python_regius              | :    | AATAAAC | TGGGGG | CACTAG | CCGC  | CTAC  | TAACA | CCCA   | CAAG  | CAAC  | CAAG  | CAAT  | CGG   | 4875 |
| Acrochordus_granulatus     | :    | AACAAAC | TGGGGG | CACTAG | CCGC  | CTAC  | TAACA | CCCA   | CAAG  | CAAC  | CAAG  | CAAT  | CGG   | 4872 |
| Cylindrophis_ruffus        | :    | AACAAAC | TGGGGG | CACTAG | CCGC  | CTAC  | TAACA | CCCA   | CAAG  | CAAC  | CAAG  | CAAT  | CGG   | 4833 |
| Ovophis_okinavensis        | :    | AACAAAC | TGGGGG | CACTAG | CCGC  | CTAC  | TAACA | CCCA   | CAAG  | CAAC  | CAAG  | CAAT  | CGG   | 4869 |
| Xenopeltis_unicolor        | :    | AATAAAC | TGGGGG | CACTAG | CCGC  | CTAC  | TAACA | CCCA   | CAAG  | CAAC  | CAAG  | CAAT  | CGG   | 4875 |
| Typlops_reticulatus        | :    | AATAAAC | TGGGGG | CACTAG | CCGC  | CTAC  | TAACA | CCCA   | CAAG  | CAAC  | CAAG  | CAAT  | CGG   | 4794 |
| Leptotyphlops_dulcis       | :    | AACAAAC | TGGGGG | CACTAG | CCGC  | CTAC  | TAACA | CCCA   | CAAG  | CAAC  | CAAG  | CAAT  | CGG   | 4810 |
| Caiman_crocodilus          | :    | AACAAAC | TGGGGG | CACTAG | CCGC  | CTAC  | TAACA | CCCA   | CAAG  | CAAC  | CAAG  | CAAT  | CGG   | 4878 |
| Alligator_sinensis         | :    | AACAAAC | TGGGGG | CACTAG | CCGC  | CTAC  | TAACA | CCCA   | CAAG  | CAAC  | CAAG  | CAAT  | CGG   | 4896 |
| Alligator_mississippiensis | :    | AATAAAC | TGGGGG | CACTAG | CCGC  | CTAC  | TAACA | CCCA   | CAAG  | CAAC  | CAAG  | CAAT  | CGG   | 4848 |
| Gavialis_gangeticus        | :    | AATAAAC | TGGGGG | CACTAG | CCGC  | CTAC  | TAACA | CCCA   | CAAG  | CAAC  | CAAG  | CAAT  | CGG   | 4881 |
| Crocodylus_moreletii       | :    | AACAAAC | TGGGGG | CACTAG | CCGC  | CTAC  | TAACA | CCCA   | CAAG  | CAAC  | CAAG  | CAAT  | CGG   | 4857 |
| Dogania_subplana           | :    | AATAAAC | TGGGGG | CACTAG | CCGC  | CTAC  | TAACA | CCCA   | CAAG  | CAAC  | CAAG  | CAAT  | CGG   | 4833 |
| Pelomedusa_subrufa         | :    | AATAAAC | TGGGGG | CACTAG | CCGC  | CTAC  | TAACA | CCCA   | CAAG  | CAAC  | CAAG  | CAAT  | CGG   | 4851 |
| Chrysemys_picta            | :    | AACAAAC | TGGGGG | CACTAG | CCGC  | CTAC  | TAACA | CCCA   | CAAG  | CAAC  | CAAG  | CAAT  | CGG   | 4869 |
| Chelonia_mydas             | :    | AACAAAC | TGGGGG | CACTAG | CCGC  | CTAC  | TAACA | CCCA   | CAAG  | CAAC  | CAAG  | CAAT  | CGG   | 4866 |
| Tinanus_major              | :    | AATAAAC | TGGGGG | CACTAG | CCGC  | CTAC  | TAACA | CCCA   | CAAG  | CAAC  | CAAG  | CAAT  | CGG   | 4851 |
| Smithornis_sharpei         | :    | AACAAAC | TGGGGG | CACTAG | CCGC  | CTAC  | TAACA | CCCA   | CAAG  | CAAC  | CAAG  | CAAT  | CGG   | 4848 |
| Corvus_frugilegus          | :    | AACAAAC | TGGGGG | CACTAG | CCGC  | CTAC  | TAACA | CCCA   | CAAG  | CAAC  | CAAG  | CAAT  | CGG   | 4848 |
| Vidua_chalybeata           | :    | AACAAAC | TGGGGG | CACTAG | CCGC  | CTAC  | TAACA | CCCA   | CAAG  | CAAC  | CAAG  | CAAT  | CGG   | 4848 |
| Buteo_buteo                | :    | AACAAAC | TGGGGG | CACTAG | CCGC  | CTAC  | TAACA | CCCA   | CAAG  | CAAC  | CAAG  | CAAT  | CGG   | 4848 |
| Falco_peregrinus           | :    | AATAAAC | TGGGGG | CACTAG | CCGC  | CTAC  | TAACA | CCCA   | CAAG  | CAAC  | CAAG  | CAAT  | CGG   | 4848 |
| Dromaius_novaeollandiae    | :    | AATAAAC | TGGGGG | CACTAG | CCGC  | CTAC  | TAACA | CCCA   | CAAG  | CAAC  | CAAG  | CAAT  | CGG   | 4851 |
| Struthio_camelus           | :    | AATAAAC | TGGGGG | CACTAG | CCGC  | CTAC  | TAACA | CCCA   | CAAG  | CAAC  | CAAG  | CAAT  | CGG   | 4854 |
| Apteryx_haastii            | :    | AACAAAC | TGGGGG | CACTAG | CCGC  | CTAC  | TAACA | CCCA   | CAAG  | CAAC  | CAAG  | CAAT  | CGG   | 4851 |
| Rhea_american              | :    | AACAAAC | TGGGGG | CACTAG | CCGC  | CTAC  | TAACA | CCCA   | CAAG  | CAAC  | CAAG  | CAAT  | CGG   | 4854 |
| Gallus_gallus              | :    | AACAAAC | TGGGGG | CACTAG | CCGC  | CTAC  | TAACA | CCCA   | CAAG  | CAAC  | CAAG  | CAAT  | CGG   | 4845 |
| Ciconia_ciconia            | :    | AACAAAC | TGGGGG | CACTAG | CCGC  | CTAC  | TAACA | CCCA   | CAAG  | CAAC  | CAAG  | CAAT  | CGG   | 4848 |
| Ciconia_boyciana           | :    | AACAAAC | TGGGGG | CACTAG | CCGC  | CTAC  | TAACA | CCCA   | CAAG  | CAAC  | CAAG  | CAAT  | CGG   | 4848 |
| Iguana_iguana              | :    | AACAAAC | TGGGGG | CACTAG | CCGC  | CTAC  | TAACA | CCCA   | CAAG  | CAAC  | CAAG  | CAAT  | CGG   | 4848 |
| Fumeca_egregius            | :    | AACAAAC | TGGGGG | CACTAG | CCGC  | CTAC  | TAACA | CCCA   | CAAG  | CAAC  | CAAG  | CAAT  | CGG   | 4851 |
| Sphenodon_punctatus        | :    | AATAAAC | TGGGGG | CACTAG | CCGC  | CTAC  | TAACA | CCCA   | CAAG  | CAAC  | CAAG  | CAAT  | CGG   | 4848 |
| Sceloporus_occidentalis    | :    | AACAAAC | TGGGGG | CACTAG | CCGC  | CTAC  | TAACA | CCCA   | CAAG  | CAAC  | CAAG  | CAAT  | CGG   | 4848 |
| Cordylus_warreni           | :    | AACAAAC | TGGGGG | CACTAG | CCGC  | CTAC  | TAACA | CCCA   | CAAG  | CAAC  | CAAG  | CAAT  | CGG   | 4860 |
| Abronia_graminea           | :    | AACAAAC | TGGGGG | CACTAG | CCGC  | CTAC  | TAACA | CCCA   | CAAG  | CAAC  | CAAG  | CAAT  | CGG   | 4845 |
| Shinisaurus_crocodilurus   | :    | AACAAAC | TGGGGG | CACTAG | CCGC  | CTAC  | TAACA | CCCA   | CAAG  | CAAC  | CAAG  | CAAT  | CGG   | 4845 |
| Varanus_komodoensis        | :    | AATAAAC | TGGGGG | CACTAG | CCGC  | CTAC  | TAACA | CCCA   | CAAG  | CAAC  | CAAG  | CAAT  | CGG   | 4896 |
| Rhineura_floridana         | :    | AATAAAC | TGGGGG | CACTAG | CCGC  | CTAC  | TAACA | CCCA   | CAAG  | CAAC  | CAAG  | CAAT  | CGG   | 4842 |
| Geocalamus_acutus          | :    | AACAAAC | TGGGGG | CACTAG | CCGC  | CTAC  | TAACA | CCCA   | CAAG  | CAAC  | CAAG  | CAAT  | CGG   | 4827 |
| Diplometopon_zarudnyi      | :    | AACAAAC | TGGGGG | CACTAG | CCGC  | CTAC  | TAACA | CCCA   | CAAG  | CAAC  | CAAG  | CAAT  | CGG   | 4827 |
| Amphisbaena_schmidti       | :    | AACAAAC | TGGGGG | CACTAG | CCGC  | CTAC  | TAACA | CCCA   | CAAG  | CAAC  | CAAG  | CAAT  | CGG   | 4836 |
| Bipes_tridactylus          | :    | AACAAAC | TGGGGG | CACTAG | CCGC  | CTAC  | TAACA | CCCA   | CAAG  | CAAC  | CAAG  | CAAT  | CGG   | 4824 |
| Bipes_canaliculatus        | :    | AACAAAC | TGGGGG | CACTAG | CCGC  | CTAC  | TAACA | CCCA   | CAAG  | CAAC  | CAAG  | CAAT  | CGG   | 4824 |
| Bipes_biporus              | :    | AACAAAC | TGGGGG | CACTAG | CCGC  | CTAC  | TAACA | CCCA   | CAAG  | CAAC  | CAAG  | CAAT  | CGG   | 4827 |
| -----                      | :    | -----   | -----  | -----  | ----- | ----- | ----- | -----  | ----- | ----- | ----- | ----- | ----- | -    |
| Anolis_carolinensis        | :    | AACAAAC | TGGGGG | CACTAG | CCGC  | CTAC  | TAACA | CCCA   | CAAG  | CAAC  | CAAG  | CAAT  | CGG   | 4889 |
| Ophisaurus_attuatus        | :    | AACAAAC | TGGGGG | CACTAG | CCGC  | CTAC  | TAACA | CCCA   | CAAG  | CAAC  | CAAG  | CAAT  | CGG   | 4863 |
| Varanus_salvator           | :    | AACAAAC | TGGGGG | CACTAG | CCGC  | CTAC  | TAACA | CCCA   | CAAG  | CAAC  | CAAG  | CAAT  | CGG   | 4889 |
| Mertensiella_luschani      | :    | AACAAAC | TGGGGG | CACTAG | CCGC  | CTAC  | TAACA | CCCA   | CAAG  | CAAC  | CAAG  | CAAT  | CGG   | 4863 |
| Xenopus_laevis             | :    | AACAAAC | TGGGGG | CACTAG | CCGC  | CTAC  | TAACA | CCCA   | CAAG  | CAAC  | CAAG  | CAAT  | CGG   | 4851 |



|                            | * | 5200 | *  | 5220 | *  | 5240 | *  | 5260 | *  | 5280 | *  | 5300 | *  | 5320 |        |
|----------------------------|---|------|----|------|----|------|----|------|----|------|----|------|----|------|--------|
| Bos_taurus                 | : | GC   | GC | GC   | GC | GC   | GC | GC   | GC | GC   | GC | GC   | GC | GC   | : 4987 |
| Hylobates_lar              | : | AT   | AT | AT   | AT | AT   | AT | AT   | AT | AT   | AT | AT   | AT | AT   | : 4993 |
| Lemur_catta                | : | GC   | GC | GC   | GC | GC   | GC | GC   | GC | GC   | GC | GC   | GC | GC   | : 4993 |
| Nycticebus_coucang         | : | GC   | GC | GC   | GC | GC   | GC | GC   | GC | GC   | GC | GC   | GC | GC   | : 4990 |
| Tarsius_bancanus           | : | GC   | GC | GC   | GC | GC   | GC | GC   | GC | GC   | GC | GC   | GC | GC   | : 4990 |
| Gorilla_gorilla            | : | GC   | GC | GC   | GC | GC   | GC | GC   | GC | GC   | GC | GC   | GC | GC   | : 4993 |
| Homo_sapiens               | : | GC   | GC | GC   | GC | GC   | GC | GC   | GC | GC   | GC | GC   | GC | GC   | : 4990 |
| Papio_hamadryas            | : | GC   | GC | GC   | GC | GC   | GC | GC   | GC | GC   | GC | GC   | GC | GC   | : 4993 |
| Cebus_albifrons            | : | GC   | GC | GC   | GC | GC   | GC | GC   | GC | GC   | GC | GC   | GC | GC   | : 4996 |
| Macaca_sylvanus            | : | GC   | GC | GC   | GC | GC   | GC | GC   | GC | GC   | GC | GC   | GC | GC   | : 4990 |
| Pongo_pygmaeus             | : | GC   | GC | GC   | GC | GC   | GC | GC   | GC | GC   | GC | GC   | GC | GC   | : 4993 |
| Pan_paniscus               | : | GC   | GC | GC   | GC | GC   | GC | GC   | GC | GC   | GC | GC   | GC | GC   | : 4993 |
| Agkistrodon_piscivorus     | : | GC   | GC | GC   | GC | GC   | GC | GC   | GC | GC   | GC | GC   | GC | GC   | : 4987 |
| Pantherophis_guttatus      | : | GC   | GC | GC   | GC | GC   | GC | GC   | GC | GC   | GC | GC   | GC | GC   | : 4981 |
| Dinodon_semicarinatus      | : | GC   | GC | GC   | GC | GC   | GC | GC   | GC | GC   | GC | GC   | GC | GC   | : 4981 |
| Boa_constrictor            | : | GC   | GC | GC   | GC | GC   | GC | GC   | GC | GC   | GC | GC   | GC | GC   | : 4990 |
| Python_regius              | : | GC   | GC | GC   | GC | GC   | GC | GC   | GC | GC   | GC | GC   | GC | GC   | : 4993 |
| Acrochordus_granulatus     | : | GC   | GC | GC   | GC | GC   | GC | GC   | GC | GC   | GC | GC   | GC | GC   | : 4990 |
| Cylindrophis_ruffus        | : | GC   | GC | GC   | GC | GC   | GC | GC   | GC | GC   | GC | GC   | GC | GC   | : 4951 |
| Ovophis_okinavensis        | : | GC   | GC | GC   | GC | GC   | GC | GC   | GC | GC   | GC | GC   | GC | GC   | : 4987 |
| Xenopeltis_unicolor        | : | GC   | GC | GC   | GC | GC   | GC | GC   | GC | GC   | GC | GC   | GC | GC   | : 4993 |
| Typhlops_reticulatus       | : | GC   | GC | GC   | GC | GC   | GC | GC   | GC | GC   | GC | GC   | GC | GC   | : 4915 |
| Leptotyphlops_dulcis       | : | GC   | GC | GC   | GC | GC   | GC | GC   | GC | GC   | GC | GC   | GC | GC   | : 4931 |
| Caiman_crocodilus          | : | GC   | GC | GC   | GC | GC   | GC | GC   | GC | GC   | GC | GC   | GC | GC   | : 4999 |
| Alligator_sinensis         | : | GC   | GC | GC   | GC | GC   | GC | GC   | GC | GC   | GC | GC   | GC | GC   | : 5017 |
| Alligator_mississippiensis | : | GC   | GC | GC   | GC | GC   | GC | GC   | GC | GC   | GC | GC   | GC | GC   | : 4969 |
| Gavialis_gangeticus        | : | GC   | GC | GC   | GC | GC   | GC | GC   | GC | GC   | GC | GC   | GC | GC   | : 5002 |
| Crocodylus_moreletii       | : | GC   | GC | GC   | GC | GC   | GC | GC   | GC | GC   | GC | GC   | GC | GC   | : 4978 |
| Dogania_subplana           | : | GC   | GC | GC   | GC | GC   | GC | GC   | GC | GC   | GC | GC   | GC | GC   | : 4954 |
| Pelomedusa_subrufa         | : | GC   | GC | GC   | GC | GC   | GC | GC   | GC | GC   | GC | GC   | GC | GC   | : 4972 |
| Chrysemys_picta            | : | GC   | GC | GC   | GC | GC   | GC | GC   | GC | GC   | GC | GC   | GC | GC   | : 4990 |
| Chelonia_mydas             | : | GC   | GC | GC   | GC | GC   | GC | GC   | GC | GC   | GC | GC   | GC | GC   | : 4987 |
| Tinamus_major              | : | GC   | GC | GC   | GC | GC   | GC | GC   | GC | GC   | GC | GC   | GC | GC   | : 4972 |
| Smithornis_sharpei         | : | GC   | GC | GC   | GC | GC   | GC | GC   | GC | GC   | GC | GC   | GC | GC   | : 4969 |
| Corvus_frugilegus          | : | GC   | GC | GC   | GC | GC   | GC | GC   | GC | GC   | GC | GC   | GC | GC   | : 4969 |
| Vidua_chalybeata           | : | GC   | GC | GC   | GC | GC   | GC | GC   | GC | GC   | GC | GC   | GC | GC   | : 4969 |
| Buteo_buteo                | : | GC   | GC | GC   | GC | GC   | GC | GC   | GC | GC   | GC | GC   | GC | GC   | : 4969 |
| Falco_peregrinus           | : | GC   | GC | GC   | GC | GC   | GC | GC   | GC | GC   | GC | GC   | GC | GC   | : 4972 |
| Dromaius_novaeollandiae    | : | GC   | GC | GC   | GC | GC   | GC | GC   | GC | GC   | GC | GC   | GC | GC   | : 4975 |
| Struthio_camelus           | : | GC   | GC | GC   | GC | GC   | GC | GC   | GC | GC   | GC | GC   | GC | GC   | : 4972 |
| Apteryx_haastii            | : | GC   | GC | GC   | GC | GC   | GC | GC   | GC | GC   | GC | GC   | GC | GC   | : 4975 |
| Rhea_americanana           | : | GC   | GC | GC   | GC | GC   | GC | GC   | GC | GC   | GC | GC   | GC | GC   | : 4966 |
| Gallus_gallus              | : | GC   | GC | GC   | GC | GC   | GC | GC   | GC | GC   | GC | GC   | GC | GC   | : 4969 |
| Ciconia_ciconia            | : | GC   | GC | GC   | GC | GC   | GC | GC   | GC | GC   | GC | GC   | GC | GC   | : 4969 |
| Ciconia_boyciana           | : | GC   | GC | GC   | GC | GC   | GC | GC   | GC | GC   | GC | GC   | GC | GC   | : 4969 |
| Iguana_iguana              | : | GC   | GC | GC   | GC | GC   | GC | GC   | GC | GC   | GC | GC   | GC | GC   | : 4972 |
| Eumeces_egregius           | : | GC   | GC | GC   | GC | GC   | GC | GC   | GC | GC   | GC | GC   | GC | GC   | : 4969 |
| Sphenodon_punctatus        | : | GC   | GC | GC   | GC | GC   | GC | GC   | GC | GC   | GC | GC   | GC | GC   | : 4969 |
| Sceloporus_occidentalis    | : | GC   | GC | GC   | GC | GC   | GC | GC   | GC | GC   | GC | GC   | GC | GC   | : 4969 |
| Cordylus_warreni           | : | GC   | GC | GC   | GC | GC   | GC | GC   | GC | GC   | GC | GC   | GC | GC   | : 4981 |
| Abronia_graminea           | : | GC   | GC | GC   | GC | GC   | GC | GC   | GC | GC   | GC | GC   | GC | GC   | : 4966 |
| Shinisaurus_crocodilurus   | : | GC   | GC | GC   | GC | GC   | GC | GC   | GC | GC   | GC | GC   | GC | GC   | : 4966 |
| Varanus_komodoensis        | : | GC   | GC | GC   | GC | GC   | GC | GC   | GC | GC   | GC | GC   | GC | GC   | : 5017 |
| Rhineura_floridana         | : | GC   | GC | GC   | GC | GC   | GC | GC   | GC | GC   | GC | GC   | GC | GC   | : 4963 |
| Geocalamus_acutus          | : | GC   | GC | GC   | GC | GC   | GC | GC   | GC | GC   | GC | GC   | GC | GC   | : 4948 |
| Diplometopon_zarudnyi      | : | GC   | GC | GC   | GC | GC   | GC | GC   | GC | GC   | GC | GC   | GC | GC   | : 4948 |
| Amphisbaena_schmidti       | : | GC   | GC | GC   | GC | GC   | GC | GC   | GC | GC   | GC | GC   | GC | GC   | : 4957 |
| Bipes_tridactylus          | : | GC   | GC | GC   | GC | GC   | GC | GC   | GC | GC   | GC | GC   | GC | GC   | : 4945 |
| Bipes_canaliculatus        | : | GC   | GC | GC   | GC | GC   | GC | GC   | GC | GC   | GC | GC   | GC | GC   | : 4945 |
| Bipes_biporus              | : | GC   | GC | GC   | GC | GC   | GC | GC   | GC | GC   | GC | GC   | GC | GC   | : 4948 |
| Anolis_carolinensis        | : | GC   | GC | GC   | GC | GC   | GC | GC   | GC | GC   | GC | GC   | GC | GC   | : -    |
| Ophisaurus_attuatus        | : | GC   | GC | GC   | GC | GC   | GC | GC   | GC | GC   | GC | GC   | GC | GC   | : -    |
| Varanus_salvator           | : | GC   | GC | GC   | GC | GC   | GC | GC   | GC | GC   | GC | GC   | GC | GC   | : 5010 |
| Mertensiella_luschani      | : | GC   | GC | GC   | GC | GC   | GC | GC   | GC | GC   | GC | GC   | GC | GC   | : 4984 |
| Xenopus_laevis             | : | GC   | GC | GC   | GC | GC   | GC | GC   | GC | GC   | GC | GC   | GC | GC   | : 4972 |

|                            |   |   |      |   |      |   |      |   |      |   |      |   |      |   |      |
|----------------------------|---|---|------|---|------|---|------|---|------|---|------|---|------|---|------|
|                            |   | * | 5340 | * | 5360 | * | 5380 | * | 5400 | * | 5420 | * | 5440 | * |      |
| Bos_taurus                 | : | G | C    | C | A    | A | A    | A | A    | A | A    | A | A    | A | 5039 |
| Hylobates_lar              | : | C | C    | T | A    | T | G    | A | A    | A | A    | A | A    | A | 5048 |
| Lemur_catta                | : | G | C    | C | T    | A | T    | G | A    | A | A    | A | A    | A | 5045 |
| Nycticebus_coucang         | : | G | C    | C | T    | A | T    | G | A    | A | A    | A | A    | A | 5042 |
| Tarsius_bancanus           | : | A | C    | C | A    | T | G    | A | A    | A | A    | A | A    | A | 5042 |
| Gorilla_gorilla            | : | C | C    | C | A    | T | G    | A | A    | A | A    | A | A    | A | 5048 |
| Homo_sapiens               | : | C | C    | C | A    | T | G    | A | A    | A | A    | A | A    | A | 5039 |
| Papio_hamadryas            | : | C | C    | C | A    | T | G    | A | A    | A | A    | A | A    | A | 5048 |
| Cebus_albifrons            | : | C | C    | C | A    | T | G    | A | A    | A | A    | A | A    | A | 5048 |
| Macaca_sylvanus            | : | C | C    | C | A    | T | G    | A | A    | A | A    | A | A    | A | 5045 |
| Pongo_pygmaeus             | : | C | C    | C | A    | T | G    | A | A    | A | A    | A | A    | A | 5048 |
| Pan_paniscus               | : | C | C    | C | A    | T | G    | A | A    | A | A    | A | A    | A | 5048 |
| Agkistrodon_piscivorus     | : | G | C    | C | T    | A | T    | G | A    | A | A    | A | A    | A | 5057 |
| Pantherophis_guttatus      | : | G | C    | C | T    | A | T    | G | A    | A | A    | A | A    | A | 5057 |
| Dinodon_semicarinatus      | : | G | C    | C | T    | A | T    | G | A    | A | A    | A | A    | A | 5057 |
| Boa_constrictor            | : | G | G    | G | G    | G | G    | A | A    | A | A    | A | A    | A | 5063 |
| Python_regius              | : | G | G    | G | A    | T | G    | A | A    | A | A    | A | A    | A | 5063 |
| Acrochordus_granulatus     | : | G | C    | C | T    | A | T    | G | A    | A | A    | A | A    | A | 5060 |
| Cylindrophis_ruffus        | : | G | C    | C | T    | A | T    | G | A    | A | A    | A | A    | A | 5027 |
| Ovophis_okinavensis        | : | G | C    | C | T    | A | T    | G | A    | A | A    | A | A    | A | 5057 |
| Xenopeltis_unicolor        | : | G | C    | C | T    | A | T    | G | A    | A | A    | A | A    | A | 5066 |
| Typhlops_reticulatus       | : | C | C    | C | A    | T | G    | A | A    | A | A    | A | A    | A | 4991 |
| Leptotyphlops_dulcis       | : | C | C    | C | T    | A | T    | G | A    | A | A    | A | A    | A | 5010 |
| Caiman_crocodilus          | : | G | G    | G | C    | C | T    | A | T    | G | A    | A | A    | A | 5069 |
| Alligator_sinensis         | : | G | A    | C | C    | T | A    | T | G    | A | A    | A | A    | A | 5099 |
| Alligator_mississippiensis | : | G | C    | C | T    | A | T    | G | A    | A | A    | A | A    | A | 5048 |
| Gavialis_gangeticus        | : | G | C    | C | T    | A | T    | G | A    | A | A    | A | A    | A | 5117 |
| Crocodylus_moreletii       | : | G | A    | A | T    | G | A    | A | A    | A | A    | A | A    | A | 5093 |
| Dogania_subplana           | : | A | C    | C | T    | A | T    | G | A    | A | A    | A | A    | A | 5018 |
| Pelomedusa_subrufa         | : | C | A    | C | T    | A | T    | G | A    | A | A    | A | A    | A | 5036 |
| Chrysemys_picta            | : | G | C    | C | T    | A | T    | G | A    | A | A    | A | A    | A | 5054 |
| Chelonia_mydas             | : | G | A    | A | T    | G | A    | A | A    | A | A    | A | A    | A | 5057 |
| Tinamus_major              | : | G | A    | C | C    | T | A    | T | G    | A | A    | A | A    | A | 5033 |
| Smithornis_sharpei         | : | G | G    | C | C    | T | A    | T | G    | A | A    | A | A    | A | 5039 |
| Corvus_frugilegus          | : | G | G    | C | T    | A | T    | G | A    | A | A    | A | A    | A | 5042 |
| Vidua_chalybeata           | : | G | G    | C | T    | A | T    | G | A    | A | A    | A | A    | A | 5042 |
| Buteo_buteo                | : | G | G    | C | T    | A | T    | G | A    | A | A    | A | A    | A | 5042 |
| Falco_peregrinus           | : | G | G    | C | T    | A | T    | G | A    | A | A    | A | A    | A | 5042 |
| Dromaius_novaeollandiae    | : | G | G    | C | C    | T | A    | T | G    | A | A    | A | A    | A | 5039 |
| Struthio_camelus           | : | G | G    | C | C    | T | A    | T | G    | A | A    | A | A    | A | 5042 |
| Apteryx_haastii            | : | G | G    | C | T    | A | T    | G | A    | A | A    | A | A    | A | 5039 |
| Rhea_americana             | : | G | G    | C | C    | T | A    | T | G    | A | A    | A | A    | A | 5042 |
| Gallus_gallus              | : | G | A    | C | C    | T | A    | T | G    | A | A    | A | A    | A | 5039 |
| Ciconia_ciconia            | : | G | G    | C | C    | T | A    | T | G    | A | A    | A | A    | A | 5042 |
| Ciconia_boyciana           | : | G | G    | C | C    | T | A    | T | G    | A | A    | A | A    | A | 5042 |
| Iguana_iguana              | : | C | C    | C | T    | A | T    | G | A    | A | A    | A | A    | A | 5036 |
| Eumeces_egregius           | : | C | A    | A | T    | G | A    | A | A    | A | A    | A | A    | A | 5039 |
| Sphenodon_punctatus        | : | G | C    | C | T    | A | T    | G | A    | A | A    | A | A    | A | 5036 |
| Sceloporus_occidentalis    | : | C | A    | C | T    | A | T    | G | A    | A | A    | A | A    | A | 5036 |
| Cordylus_warreni           | : | C | A    | A | T    | G | A    | A | A    | A | A    | A | A    | A | 5048 |
| Abronia_graminea           | : | G | C    | T | A    | T | G    | A | A    | A | A    | A | A    | A | 5033 |
| Shinisaurus_crocodilurus   | : | G | C    | T | A    | T | G    | A | A    | A | A    | A | A    | A | 5027 |
| Varanus_komodoensis        | : | A | C    | C | T    | A | T    | G | A    | A | A    | A | A    | A | 5078 |
| Rhineura_floridana         | : | C | C    | C | T    | A | T    | G | A    | A | A    | A | A    | A | 5021 |
| Geocalamus_acutus          | : | C | A    | C | T    | A | T    | G | A    | A | A    | A | A    | A | 5012 |
| Diplometopon_zarudnyi      | : | C | A    | C | T    | A | T    | G | A    | A | A    | A | A    | A | 5018 |
| Amphisbaena_schmidti       | : | C | A    | C | T    | A | T    | G | A    | A | A    | A | A    | A | 5018 |
| Bipes_tridactylus          | : | C | G    | C | C    | T | A    | T | G    | A | A    | A | A    | A | 5009 |
| Bipes_canaliculatus        | : | C | C    | C | C    | T | A    | T | G    | A | A    | A | A    | A | 5021 |
| Bipes_biporus              | : | C | A    | C | C    | T | A    | T | G    | A | A    | A | A    | A | 5060 |
| Anolis_carolinensis        | : | A | C    | C | C    | T | A    | T | G    | A | A    | A | A    | A | 4710 |
| Ophisaurus_attnuatus       | : | A | C    | C | C    | T | A    | T | G    | A | A    | A | A    | A | 4665 |
| Varanus_salvator           | : | A | C    | C | C    | T | A    | T | G    | A | A    | A | A    | A | 5071 |
| Mertensiella_luschani      | : | G | C    | C | T    | A | T    | G | A    | A | A    | A | A    | A | 5051 |
| Xenopus_laevis             | : | G | T    | G | T    | G | A    | A | A    | A | A    | A | A    | A | 5039 |

|                            |   |                                                                                               |     |                                |   |      |   |      |   |      |   |      |   |      |  |
|----------------------------|---|-----------------------------------------------------------------------------------------------|-----|--------------------------------|---|------|---|------|---|------|---|------|---|------|--|
|                            |   | 5460                                                                                          | *   | 5480                           | * | 5500 | * | 5520 | * | 5540 | * | 5560 | * | 5580 |  |
| Bos_taurus                 | : | ACAAATACCCATCCAAATGGCGGAGCATTCCTACGCTAGCGGAAAGANAAGTCTAGGCTATATACAACTCCGAAAAGGCCAAATGCGTAGGG  | --- | CAATGGCCCTACTCAACCCATGGCGGAT   | : | 5169 |   |      |   |      |   |      |   |      |  |
| Hylobates_lar              | : | CCATCCATCCCAACCCCAATGGCAATGCAATCTAACTTAACCGAAGAAAATCTAGGCTATATACAACTAGCAAAGGCCCAACCTAGAGGG    | --- | CCATGGCCCTACTCAACCCATGGCGGAT   | : | 5178 |   |      |   |      |   |      |   |      |  |
| Lemur_catta                | : | ACAAATACCCATCCAAATGGCGGAGCATTCCTACGCTAGCGGAAAGANAAGTCTAGGCTATATACAACTCCGAAAAGGCCAAATGCGTAGGG  | --- | CCATGGCCCTACTCAACCCATGGCGGAT   | : | 5175 |   |      |   |      |   |      |   |      |  |
| Nycticebus_coucang         | : | GGCGAATCCCGGAAATAGTAGCCATAGATCTTACACCCCTAGAGAGAAAATCTAGGCTATATACAACTCCGAAAAGGCCAAATGCGTAGGG   | --- | CCAAACGGCCCTACTCAACCCATGGCGGAT | : | 5172 |   |      |   |      |   |      |   |      |  |
| Tarsius_bancanus           | : | CCAAATACCCATCCAAATGGCGGAGCATTCCTACGCTAGCGGAAAGANAAGTCTAGGCTATATACAACTCCGAAAAGGCCAAATGCGTAGGG  | --- | CCATGGCCCTACTCAACCCATGGCGGAT   | : | 5172 |   |      |   |      |   |      |   |      |  |
| Gorilla_gorilla            | : | CCAAATACCCATCCAAATGGCGGAGCATTCCTACGCTAGCGGAAAGANAAGTCTAGGCTATATACAACTAGCAAAGGCCCAACCTAGAGGG   | --- | CCATGGCCCTACTCAACCCATGGCGGAT   | : | 5178 |   |      |   |      |   |      |   |      |  |
| Homo_sapiens               | : | CCCAATGTAACCCATCCAAATGGCAATGCAATCTAACTTAACCGAAGAAAATCTAGGCTATATACAACTAGCAAAGGCCCAACCTAGAGGG   | --- | CCATGGCCCTACTCAACCCATGGCGGAT   | : | 5169 |   |      |   |      |   |      |   |      |  |
| Papio_hamadryas            | : | CCCAATGTAACCCATCCAAATGGCAATGCAATCTAACTTAACCGAAGAAAATCTAGGCTATATACAACTAGCAAAGGCCCAACCTAGAGGG   | --- | CCATGGCCCTACTCAACCCATGGCGGAT   | : | 5178 |   |      |   |      |   |      |   |      |  |
| Cebus_albifrons            | : | ACAAATACCCATCCAAATGGCGGAGCATTCCTACGCTAGCGGAAAGANAAGTCTAGGCTATATACAACTCCGAAAAGGCCAAATGCGTAGGG  | --- | CCATGGCCCTACTCAACCCATGGCGGAT   | : | 5178 |   |      |   |      |   |      |   |      |  |
| Macaca_sylvanus            | : | CCAAATACCCATCCAAATGGCGGAGCATTCCTACGCTAGCGGAAAGANAAGTCTAGGCTATATACAACTAGCAAAGGCCCAACCTAGAGGG   | --- | CCATGGCCCTACTCAACCCATGGCGGAT   | : | 5175 |   |      |   |      |   |      |   |      |  |
| Pongo_pygmaeus             | : | CCCAATGTAACCCATCCAAATGGCAATGCAATCTAACTTAACCGAAGAAAATCTAGGCTATATACAACTAGCAAAGGCCCAACCTAGAGGG   | --- | CCATGGCCCTACTCAACCCATGGCGGAT   | : | 5178 |   |      |   |      |   |      |   |      |  |
| Pan_paniscus               | : | CCCAATGTAACCCATCCAAATGGCAATGCAATCTAACTTAACCGAAGAAAATCTAGGCTATATACAACTAGCAAAGGCCCAACCTAGAGGG   | --- | CCATGGCCCTACTCAACCCATGGCGGAT   | : | 5178 |   |      |   |      |   |      |   |      |  |
| Agkistrodon_piscivorus     | : | CCCAATGTAACCCATCCAAATGGCAATGCAATCTAACTTAACCGAAGAAAATCTAGGCTATATACAACTAGCAAAGGCCCAACCTAGAGGG   | --- | CCATGGCCCTACTCAACCCATGGCGGAT   | : | 5187 |   |      |   |      |   |      |   |      |  |
| Pantherophis_guttatus      | : | ATACATTTATCAATCTTATGCGCGGAGCATTCCTACGCTAGCGGAAAGANAAGTCTAGGCTATATACAACTAGCAAAGGCCCAACCTAGAGGG | --- | CCATGGCCCTACTCAACCCATGGCGGAT   | : | 5187 |   |      |   |      |   |      |   |      |  |
| Dinodon_semicarinatus      | : | CCCAATGTAACCCATCCAAATGGCAATGCAATCTAACTTAACCGAAGAAAATCTAGGCTATATACAACTAGCAAAGGCCCAACCTAGAGGG   | --- | CCATGGCCCTACTCAACCCATGGCGGAT   | : | 5187 |   |      |   |      |   |      |   |      |  |
| Boa_constrictor            | : | ATACATTTATCAATCTTATGCGCGGAGCATTCCTACGCTAGCGGAAAGANAAGTCTAGGCTATATACAACTAGCAAAGGCCCAACCTAGAGGG | --- | CCATGGCCCTACTCAACCCATGGCGGAT   | : | 5193 |   |      |   |      |   |      |   |      |  |
| Python_regius              | : | ATACATTTATCAATCTTATGCGCGGAGCATTCCTACGCTAGCGGAAAGANAAGTCTAGGCTATATACAACTAGCAAAGGCCCAACCTAGAGGG | --- | CCATGGCCCTACTCAACCCATGGCGGAT   | : | 5193 |   |      |   |      |   |      |   |      |  |
| Acrochordus_granulatus     | : | ATACATTTATCAATCTTATGCGCGGAGCATTCCTACGCTAGCGGAAAGANAAGTCTAGGCTATATACAACTAGCAAAGGCCCAACCTAGAGGG | --- | CCATGGCCCTACTCAACCCATGGCGGAT   | : | 5190 |   |      |   |      |   |      |   |      |  |
| Cylindrophis_ruffus        | : | ATACATTTATCAATCTTATGCGCGGAGCATTCCTACGCTAGCGGAAAGANAAGTCTAGGCTATATACAACTAGCAAAGGCCCAACCTAGAGGG | --- | CCATGGCCCTACTCAACCCATGGCGGAT   | : | 5157 |   |      |   |      |   |      |   |      |  |
| Ovophis_okinavensis        | : | ATACATTTATCAATCTTATGCGCGGAGCATTCCTACGCTAGCGGAAAGANAAGTCTAGGCTATATACAACTAGCAAAGGCCCAACCTAGAGGG | --- | CCATGGCCCTACTCAACCCATGGCGGAT   | : | 5187 |   |      |   |      |   |      |   |      |  |
| Xenopeltis_unicolor        | : | ATACATTTATCAATCTTATGCGCGGAGCATTCCTACGCTAGCGGAAAGANAAGTCTAGGCTATATACAACTAGCAAAGGCCCAACCTAGAGGG | --- | CCATGGCCCTACTCAACCCATGGCGGAT   | : | 5196 |   |      |   |      |   |      |   |      |  |
| Typhlops_reticulatus       | : | ATACATTTATCAATCTTATGCGCGGAGCATTCCTACGCTAGCGGAAAGANAAGTCTAGGCTATATACAACTAGCAAAGGCCCAACCTAGAGGG | --- | CCATGGCCCTACTCAACCCATGGCGGAT   | : | 5121 |   |      |   |      |   |      |   |      |  |
| Leptotyphlops_dulcis       | : | GTATATACCCATCCAAATGGCGGAGCATTCCTACGCTAGCGGAAAGANAAGTCTAGGCTATATACAACTAGCAAAGGCCCAACCTAGAGGG   | --- | CCATGGCCCTACTCAACCCATGGCGGAT   | : | 5140 |   |      |   |      |   |      |   |      |  |
| Caiman_crocodilus          | : | ATACATTTATCAATCTTATGCGCGGAGCATTCCTACGCTAGCGGAAAGANAAGTCTAGGCTATATACAACTAGCAAAGGCCCAACCTAGAGGG | --- | CCATGGCCCTACTCAACCCATGGCGGAT   | : | 5199 |   |      |   |      |   |      |   |      |  |
| Alligator_sinensis         | : | ATACATTTATCAATCTTATGCGCGGAGCATTCCTACGCTAGCGGAAAGANAAGTCTAGGCTATATACAACTAGCAAAGGCCCAACCTAGAGGG | --- | CCATGGCCCTACTCAACCCATGGCGGAT   | : | 5229 |   |      |   |      |   |      |   |      |  |
| Alligator_mississippiensis | : | ATACATTTATCAATCTTATGCGCGGAGCATTCCTACGCTAGCGGAAAGANAAGTCTAGGCTATATACAACTAGCAAAGGCCCAACCTAGAGGG | --- | CCATGGCCCTACTCAACCCATGGCGGAT   | : | 5178 |   |      |   |      |   |      |   |      |  |
| Gavialis_gangeticus        | : | ATACATTTATCAATCTTATGCGCGGAGCATTCCTACGCTAGCGGAAAGANAAGTCTAGGCTATATACAACTAGCAAAGGCCCAACCTAGAGGG | --- | CCATGGCCCTACTCAACCCATGGCGGAT   | : | 5247 |   |      |   |      |   |      |   |      |  |
| Crocodylus_moreletii       | : | ATACATTTATCAATCTTATGCGCGGAGCATTCCTACGCTAGCGGAAAGANAAGTCTAGGCTATATACAACTAGCAAAGGCCCAACCTAGAGGG | --- | CCATGGCCCTACTCAACCCATGGCGGAT   | : | 5223 |   |      |   |      |   |      |   |      |  |
| Dogania_subplana           | : | GTATATACCCATCCAAATGGCGGAGCATTCCTACGCTAGCGGAAAGANAAGTCTAGGCTATATACAACTAGCAAAGGCCCAACCTAGAGGG   | --- | CCATGGCCCTACTCAACCCATGGCGGAT   | : | 5148 |   |      |   |      |   |      |   |      |  |
| Pelomedusa_subrufa         | : | ATACATTTATCAATCTTATGCGCGGAGCATTCCTACGCTAGCGGAAAGANAAGTCTAGGCTATATACAACTAGCAAAGGCCCAACCTAGAGGG | --- | CCATGGCCCTACTCAACCCATGGCGGAT   | : | 5166 |   |      |   |      |   |      |   |      |  |
| Chrysemys_picta            | : | ATACATTTATCAATCTTATGCGCGGAGCATTCCTACGCTAGCGGAAAGANAAGTCTAGGCTATATACAACTAGCAAAGGCCCAACCTAGAGGG | --- | CCATGGCCCTACTCAACCCATGGCGGAT   | : | 5184 |   |      |   |      |   |      |   |      |  |
| Chelonia_mydas             | : | ATACATTTATCAATCTTATGCGCGGAGCATTCCTACGCTAGCGGAAAGANAAGTCTAGGCTATATACAACTAGCAAAGGCCCAACCTAGAGGG | --- | CCATGGCCCTACTCAACCCATGGCGGAT   | : | 5187 |   |      |   |      |   |      |   |      |  |
| Tinanus_major              | : | ATACATTTATCAATCTTATGCGCGGAGCATTCCTACGCTAGCGGAAAGANAAGTCTAGGCTATATACAACTAGCAAAGGCCCAACCTAGAGGG | --- | CCATGGCCCTACTCAACCCATGGCGGAT   | : | 5163 |   |      |   |      |   |      |   |      |  |
| Smithornis_sharpei         | : | ATACATTTATCAATCTTATGCGCGGAGCATTCCTACGCTAGCGGAAAGANAAGTCTAGGCTATATACAACTAGCAAAGGCCCAACCTAGAGGG | --- | CCATGGCCCTACTCAACCCATGGCGGAT   | : | 5169 |   |      |   |      |   |      |   |      |  |
| Corvus_frugilegus          | : | ATACATTTATCAATCTTATGCGCGGAGCATTCCTACGCTAGCGGAAAGANAAGTCTAGGCTATATACAACTAGCAAAGGCCCAACCTAGAGGG | --- | CCATGGCCCTACTCAACCCATGGCGGAT   | : | 5172 |   |      |   |      |   |      |   |      |  |
| Vidua_chalybeata           | : | ATACATTTATCAATCTTATGCGCGGAGCATTCCTACGCTAGCGGAAAGANAAGTCTAGGCTATATACAACTAGCAAAGGCCCAACCTAGAGGG | --- | CCATGGCCCTACTCAACCCATGGCGGAT   | : | 5172 |   |      |   |      |   |      |   |      |  |
| Buteo_buteo                | : | ATACATTTATCAATCTTATGCGCGGAGCATTCCTACGCTAGCGGAAAGANAAGTCTAGGCTATATACAACTAGCAAAGGCCCAACCTAGAGGG | --- | CCATGGCCCTACTCAACCCATGGCGGAT   | : | 5172 |   |      |   |      |   |      |   |      |  |
| Falco_peregrinus           | : | ATACATTTATCAATCTTATGCGCGGAGCATTCCTACGCTAGCGGAAAGANAAGTCTAGGCTATATACAACTAGCAAAGGCCCAACCTAGAGGG | --- | CCATGGCCCTACTCAACCCATGGCGGAT   | : | 5172 |   |      |   |      |   |      |   |      |  |
| Dromaius_novaeollandiae    | : | ATACATTTATCAATCTTATGCGCGGAGCATTCCTACGCTAGCGGAAAGANAAGTCTAGGCTATATACAACTAGCAAAGGCCCAACCTAGAGGG | --- | CCATGGCCCTACTCAACCCATGGCGGAT   | : | 5169 |   |      |   |      |   |      |   |      |  |
| Struthio_camelus           | : | ATACATTTATCAATCTTATGCGCGGAGCATTCCTACGCTAGCGGAAAGANAAGTCTAGGCTATATACAACTAGCAAAGGCCCAACCTAGAGGG | --- | CCATGGCCCTACTCAACCCATGGCGGAT   | : | 5172 |   |      |   |      |   |      |   |      |  |
| Apteryx_haastii            | : | ATACATTTATCAATCTTATGCGCGGAGCATTCCTACGCTAGCGGAAAGANAAGTCTAGGCTATATACAACTAGCAAAGGCCCAACCTAGAGGG | --- | CCATGGCCCTACTCAACCCATGGCGGAT   | : | 5169 |   |      |   |      |   |      |   |      |  |
| Rhea_americanana           | : | ATACATTTATCAATCTTATGCGCGGAGCATTCCTACGCTAGCGGAAAGANAAGTCTAGGCTATATACAACTAGCAAAGGCCCAACCTAGAGGG | --- | CCATGGCCCTACTCAACCCATGGCGGAT   | : | 5172 |   |      |   |      |   |      |   |      |  |
| Gallus_gallus              | : | ATACATTTATCAATCTTATGCGCGGAGCATTCCTACGCTAGCGGAAAGANAAGTCTAGGCTATATACAACTAGCAAAGGCCCAACCTAGAGGG | --- | CCATGGCCCTACTCAACCCATGGCGGAT   | : | 5169 |   |      |   |      |   |      |   |      |  |
| Ciconia_ciconia            | : | ATACATTTATCAATCTTATGCGCGGAGCATTCCTACGCTAGCGGAAAGANAAGTCTAGGCTATATACAACTAGCAAAGGCCCAACCTAGAGGG | --- | CCATGGCCCTACTCAACCCATGGCGGAT   | : | 5172 |   |      |   |      |   |      |   |      |  |
| Ciconia_boyciiana          | : | ATACATTTATCAATCTTATGCGCGGAGCATTCCTACGCTAGCGGAAAGANAAGTCTAGGCTATATACAACTAGCAAAGGCCCAACCTAGAGGG | --- | CCATGGCCCTACTCAACCCATGGCGGAT   | : | 5172 |   |      |   |      |   |      |   |      |  |
| Iguana_iguana              | : | ATACATTTATCAATCTTATGCGCGGAGCATTCCTACGCTAGCGGAAAGANAAGTCTAGGCTATATACAACTAGCAAAGGCCCAACCTAGAGGG | --- | CCATGGCCCTACTCAACCCATGGCGGAT   | : | 5166 |   |      |   |      |   |      |   |      |  |
| Fumeces_egregius           | : | ATACATTTATCAATCTTATGCGCGGAGCATTCCTACGCTAGCGGAAAGANAAGTCTAGGCTATATACAACTAGCAAAGGCCCAACCTAGAGGG | --- | CCATGGCCCTACTCAACCCATGGCGGAT   | : | 5169 |   |      |   |      |   |      |   |      |  |
| Sphenodon_punctatus        | : | ATACATTTATCAATCTTATGCGCGGAGCATTCCTACGCTAGCGGAAAGANAAGTCTAGGCTATATACAACTAGCAAAGGCCCAACCTAGAGGG | --- | CCATGGCCCTACTCAACCCATGGCGGAT   | : | 5166 |   |      |   |      |   |      |   |      |  |
| Sceloporus_occidentalis    | : | ATACATTTATCAATCTTATGCGCGGAGCATTCCTACGCTAGCGGAAAGANAAGTCTAGGCTATATACAACTAGCAAAGGCCCAACCTAGAGGG | --- | CCATGGCCCTACTCAACCCATGGCGGAT   | : | 5166 |   |      |   |      |   |      |   |      |  |
| Cordylus_warreni           | : | ATACATTTATCAATCTTATGCGCGGAGCATTCCTACGCTAGCGGAAAGANAAGTCTAGGCTATATACAACTAGCAAAGGCCCAACCTAGAGGG | --- | CCATGGCCCTACTCAACCCATGGCGGAT   | : | 5178 |   |      |   |      |   |      |   |      |  |
| Abronia_graminea           | : | ATACATTTATCAATCTTATGCGCGGAGCATTCCTACGCTAGCGGAAAGANAAGTCTAGGCTATATACAACTAGCAAAGGCCCAACCTAGAGGG | --- | CCATGGCCCTACTCAACCCATGGCGGAT   | : | 5163 |   |      |   |      |   |      |   |      |  |
| Shinisaurus_crocodilurus   | : | ATACATTTATCAATCTTATGCGCGGAGCATTCCTACGCTAGCGGAAAGANAAGTCTAGGCTATATACAACTAGCAAAGGCCCAACCTAGAGGG | --- | CCATGGCCCTACTCAACCCATGGCGGAT   | : | 5157 |   |      |   |      |   |      |   |      |  |
| Varanus_komodoensis        | : | ATACATTTATCAATCTTATGCGCGGAGCATTCCTACGCTAGCGGAAAGANAAGTCTAGGCTATATACAACTAGCAAAGGCCCAACCTAGAGGG | --- | CCATGGCCCTACTCAACCCATGGCGGAT   | : | 5208 |   |      |   |      |   |      |   |      |  |
| Rhineura_floridana         | : | ATACATTTATCAATCTTATGCGCGGAGCATTCCTACGCTAGCGGAAAGANAAGTCTAGGCTATATACAACTAGCAAAGGCCCAACCTAGAGGG | --- | CCATGGCCCTACTCAACCCATGGCGGAT   | : | 5151 |   |      |   |      |   |      |   |      |  |
| Geocalamus_acutus          | : | ATACATTTATCAATCTTATGCGCGGAGCATTCCTACGCTAGCGGAAAGANAAGTCTAGGCTATATACAACTAGCAAAGGCCCAACCTAGAGGG | --- | CCATGGCCCTACTCAACCCATGGCGGAT   | : | 5142 |   |      |   |      |   |      |   |      |  |
| Diplometopon_zarudnyi      | : | ATACATTTATCAATCTTATGCGCGGAGCATTCCTACGCTAGCGGAAAGANAAGTCTAGGCTATATACAACTAGCAAAGGCCCAACCTAGAGGG | --- | CCATGGCCCTACTCAACCCATGGCGGAT   | : | 5148 |   |      |   |      |   |      |   |      |  |
| Amphisbaena_schmidti       | : | ATACATTTATCAATCTTATGCGCGGAGCATTCCTACGCTAGCGGAAAGANAAGTCTAGGCTATATACAACTAGCAAAGGCCCAACCTAGAGGG | --- | CCATGGCCCTACTCAACCCATGGCGGAT   | : | 5148 |   |      |   |      |   |      |   |      |  |
| Bipes_tridactylus          | : | ATACATTTATCAATCTTATGCGCGGAGCATTCCTACGCTAGCGGAAAGANAAGTCTAGGCTATATACAACTAGCAAAGGCCCAACCTAGAGGG | --- | CCATGGCCCTACTCAACCCATGGCGGAT   | : | 5139 |   |      |   |      |   |      |   |      |  |
| Bipes_canaliculatus        | : | ATACATTTATCAATCTTATGCGCGGAGCATTCCTACGCTAGCGGAAAGANAAGTCTAGGCTATATACAACTAGCAAAGGCCCAACCTAGAGGG | --- | CCATGGCCCTACTCAACCCATGGCGGAT   | : | 5151 |   |      |   |      |   |      |   |      |  |
| Bipes_biporus              | : | ATACATTTATCAATCTTATGCGCGGAGCATTCCTACGCTAGCGGAAAGANAAGTCTAGGCTATATACAACTAGCAAAGGCCCAACCTAGAGGG | --- | CCATGGCCCTACTCAACCCATGGCGGAT   | : | 5190 |   |      |   |      |   |      |   |      |  |
| Anolis_carolinensis        | : | ATACATTTATCAATCTTATGCGCGGAGCATTCCTACGCTAGCGGAAAGANAAGTCTAGGCTATATACAACTAGCAAAGGCCCAACCTAGAGGG | --- | CCATGGCCCTACTCAACCCATGGCGGAT   | : | 4840 |   |      |   |      |   |      |   |      |  |
| Ophisaurus_atnuatus        | : | ATACATTTATCAATCTTATGCGCGGAGCATTCCTACGCTAGCGGAAAGANAAGTCTAGGCTATATACAACTAGCAAAGGCCCAACCTAGAGGG | --- | CCATGGCCCTACTCAACCCATGGCGGAT   | : | 4795 |   |      |   |      |   |      |   |      |  |
| Varanus_salvator           | : | ATACATTTATCAATCTTATGCGCGGAGCATTCCTACGCTAGCGGAAAGANAAGTCTAGGCTATATACAACTAGCAAAGGCCCAACCTAGAGGG | --- | CCATGGCCCTACTCAACCCATGGCGGAT   | : | 5201 |   |      |   |      |   |      |   |      |  |
| Mertensiella_luschani      | : | ATACATTTATCAATCTTATGCGCGGAGCATTCCTACGCTAGCGGAAAGANAAGTCTAGGCTATATACAACTAGCAAAGGCCCAACCTAGAGGG | --- | CCATGGCCCTACTCAACCCATGGCGGAT   | : | 5181 |   |      |   |      |   |      |   |      |  |
| Xenopus_laevis             | : | ATACATTTATCAATCTTATGCGCGGAGCATTCCTACGCTAGCGGAAAGANAAGTCTAGGCTATATACAACTAGCAAAGGCCCAACCTAGAGGG | --- | CCATGGCCCTACTCAACCCATGGCGGAT   | : | 5169 |   |      |   |      |   |      |   |      |  |

```

*      5600      *      5620      *      5640      *      5660      *      5680      *      5700      *      572
Bos_taurus      : GCATCAAAATTTATTAAGAGCAATCGCCCGCTACATCTGCGCAATATATGACAGCAACAAATAGTATAGGCCATAGCCCTAAACCAAGTGAATCCCAACCAATCCCTATCCCTAT  5302
Hylobates_lar  : GCATCAAAAGTCTTACCAAAAGAACCCCAAAACAAATACCAACCAACCGCCCTATATATCAAGCCCAACCTTAGCCCTATCCATGAAACCCCAACCCCAACCCCAACCCCAAC  5311
Lemur_catta    : GCATCAAAATTTATTAAGAGCAATCGCCCGCTACATCTGCGCAATATATGACAGCAACAAATAGTATAGGCCATAGCCCTAAACCAAGTGAATCCCAACCAATCCCTATCCCTAT  5308
Nycticebus_coucang : GCATCAAAATTTATTAAGAGCAATCGCCCGCTACATCTGCGCAATATATGACAGCAACAAATAGTATAGGCCATAGCCCTAAACCAAGTGAATCCCAACCAATCCCTATCCCTAT  5305
Tarsius_bancanus : GCATCAAAATTTATTAAGAGCAATCGCCCGCTACATCTGCGCAATATATGACAGCAACAAATAGTATAGGCCATAGCCCTAAACCAAGTGAATCCCAACCAATCCCTATCCCTAT  5305
Gorilla_gorilla : GCATCAAAATTTATTAAGAGCAATCGCCCGCTACATCTGCGCAATATATGACAGCAACAAATAGTATAGGCCATAGCCCTAAACCAAGTGAATCCCAACCAATCCCTATCCCTAT  5311
Homo_sapiens   : GCATCAAAATTTATTAAGAGCAATCGCCCGCTACATCTGCGCAATATATGACAGCAACAAATAGTATAGGCCATAGCCCTAAACCAAGTGAATCCCAACCAATCCCTATCCCTAT  5302
Papio_hamadryas : GCATCAAAATTTATTAAGAGCAATCGCCCGCTACATCTGCGCAATATATGACAGCAACAAATAGTATAGGCCATAGCCCTAAACCAAGTGAATCCCAACCAATCCCTATCCCTAT  5311
Cebus_albifrons : GCATCAAAATTTATTAAGAGCAATCGCCCGCTACATCTGCGCAATATATGACAGCAACAAATAGTATAGGCCATAGCCCTAAACCAAGTGAATCCCAACCAATCCCTATCCCTAT  5311
Macaca_sylvanus : GCATCAAAATTTATTAAGAGCAATCGCCCGCTACATCTGCGCAATATATGACAGCAACAAATAGTATAGGCCATAGCCCTAAACCAAGTGAATCCCAACCAATCCCTATCCCTAT  5308
Pongo_pygmaeus : GCATCAAAATTTATTAAGAGCAATCGCCCGCTACATCTGCGCAATATATGACAGCAACAAATAGTATAGGCCATAGCCCTAAACCAAGTGAATCCCAACCAATCCCTATCCCTAT  5311
Pan_paniscus   : GCATCAAAATTTATTAAGAGCAATCGCCCGCTACATCTGCGCAATATATGACAGCAACAAATAGTATAGGCCATAGCCCTAAACCAAGTGAATCCCAACCAATCCCTATCCCTAT  5311
Agkistrodon_piscivorus : GCATCAAAATTTATTAAGAGCAATCGCCCGCTACATCTGCGCAATATATGACAGCAACAAATAGTATAGGCCATAGCCCTAAACCAAGTGAATCCCAACCAATCCCTATCCCTAT  5320
Pantherophis_guttatus : GCATCAAAATTTATTAAGAGCAATCGCCCGCTACATCTGCGCAATATATGACAGCAACAAATAGTATAGGCCATAGCCCTAAACCAAGTGAATCCCAACCAATCCCTATCCCTAT  5320
Dinodon_semicarinatus : GCATCAAAATTTATTAAGAGCAATCGCCCGCTACATCTGCGCAATATATGACAGCAACAAATAGTATAGGCCATAGCCCTAAACCAAGTGAATCCCAACCAATCCCTATCCCTAT  5320
Boa_constrictor : GCATCAAAATTTATTAAGAGCAATCGCCCGCTACATCTGCGCAATATATGACAGCAACAAATAGTATAGGCCATAGCCCTAAACCAAGTGAATCCCAACCAATCCCTATCCCTAT  5326
Python_regius  : GCATCAAAATTTATTAAGAGCAATCGCCCGCTACATCTGCGCAATATATGACAGCAACAAATAGTATAGGCCATAGCCCTAAACCAAGTGAATCCCAACCAATCCCTATCCCTAT  5326
Acrochordus_granulatus : GCATCAAAATTTATTAAGAGCAATCGCCCGCTACATCTGCGCAATATATGACAGCAACAAATAGTATAGGCCATAGCCCTAAACCAAGTGAATCCCAACCAATCCCTATCCCTAT  5323
Chelonephorus_ruffus : GCATCAAAATTTATTAAGAGCAATCGCCCGCTACATCTGCGCAATATATGACAGCAACAAATAGTATAGGCCATAGCCCTAAACCAAGTGAATCCCAACCAATCCCTATCCCTAT  5290
Ovophis_okinavensis : GCATCAAAATTTATTAAGAGCAATCGCCCGCTACATCTGCGCAATATATGACAGCAACAAATAGTATAGGCCATAGCCCTAAACCAAGTGAATCCCAACCAATCCCTATCCCTAT  5320
Xenopeltis_unicolor : GCATCAAAATTTATTAAGAGCAATCGCCCGCTACATCTGCGCAATATATGACAGCAACAAATAGTATAGGCCATAGCCCTAAACCAAGTGAATCCCAACCAATCCCTATCCCTAT  5329
Typhlops_reticulatus : GCATCAAAATTTATTAAGAGCAATCGCCCGCTACATCTGCGCAATATATGACAGCAACAAATAGTATAGGCCATAGCCCTAAACCAAGTGAATCCCAACCAATCCCTATCCCTAT  5254
Leptotyphlops_dulcis : GCATCAAAATTTATTAAGAGCAATCGCCCGCTACATCTGCGCAATATATGACAGCAACAAATAGTATAGGCCATAGCCCTAAACCAAGTGAATCCCAACCAATCCCTATCCCTAT  5273
Caiman_crocodilus : GCATCAAAATTTATTAAGAGCAATCGCCCGCTACATCTGCGCAATATATGACAGCAACAAATAGTATAGGCCATAGCCCTAAACCAAGTGAATCCCAACCAATCCCTATCCCTAT  5332
Alligator_sinensis : GCATCAAAATTTATTAAGAGCAATCGCCCGCTACATCTGCGCAATATATGACAGCAACAAATAGTATAGGCCATAGCCCTAAACCAAGTGAATCCCAACCAATCCCTATCCCTAT  5362
Alligator_mississippiensis : GCATCAAAATTTATTAAGAGCAATCGCCCGCTACATCTGCGCAATATATGACAGCAACAAATAGTATAGGCCATAGCCCTAAACCAAGTGAATCCCAACCAATCCCTATCCCTAT  5311
Gavialis_gangeticus : GCATCAAAATTTATTAAGAGCAATCGCCCGCTACATCTGCGCAATATATGACAGCAACAAATAGTATAGGCCATAGCCCTAAACCAAGTGAATCCCAACCAATCCCTATCCCTAT  5380
Crocodylus_moreletii : GCATCAAAATTTATTAAGAGCAATCGCCCGCTACATCTGCGCAATATATGACAGCAACAAATAGTATAGGCCATAGCCCTAAACCAAGTGAATCCCAACCAATCCCTATCCCTAT  5356
Dogania_subplana : GCATCAAAATTTATTAAGAGCAATCGCCCGCTACATCTGCGCAATATATGACAGCAACAAATAGTATAGGCCATAGCCCTAAACCAAGTGAATCCCAACCAATCCCTATCCCTAT  5281
Pelomedusa_subrufa : GCATCAAAATTTATTAAGAGCAATCGCCCGCTACATCTGCGCAATATATGACAGCAACAAATAGTATAGGCCATAGCCCTAAACCAAGTGAATCCCAACCAATCCCTATCCCTAT  5299
Chrysemys_picta : GCATCAAAATTTATTAAGAGCAATCGCCCGCTACATCTGCGCAATATATGACAGCAACAAATAGTATAGGCCATAGCCCTAAACCAAGTGAATCCCAACCAATCCCTATCCCTAT  5317
Chelonia_mydas : GCATCAAAATTTATTAAGAGCAATCGCCCGCTACATCTGCGCAATATATGACAGCAACAAATAGTATAGGCCATAGCCCTAAACCAAGTGAATCCCAACCAATCCCTATCCCTAT  5320
Tinamus_major : GCATCAAAATTTATTAAGAGCAATCGCCCGCTACATCTGCGCAATATATGACAGCAACAAATAGTATAGGCCATAGCCCTAAACCAAGTGAATCCCAACCAATCCCTATCCCTAT  5296
Smithornis_sharpei : GCATCAAAATTTATTAAGAGCAATCGCCCGCTACATCTGCGCAATATATGACAGCAACAAATAGTATAGGCCATAGCCCTAAACCAAGTGAATCCCAACCAATCCCTATCCCTAT  5302
Corvus_frugilegus : GCATCAAAATTTATTAAGAGCAATCGCCCGCTACATCTGCGCAATATATGACAGCAACAAATAGTATAGGCCATAGCCCTAAACCAAGTGAATCCCAACCAATCCCTATCCCTAT  5305
Vidua_chalybeata : GCATCAAAATTTATTAAGAGCAATCGCCCGCTACATCTGCGCAATATATGACAGCAACAAATAGTATAGGCCATAGCCCTAAACCAAGTGAATCCCAACCAATCCCTATCCCTAT  5305
Buteo_buteo    : GCATCAAAATTTATTAAGAGCAATCGCCCGCTACATCTGCGCAATATATGACAGCAACAAATAGTATAGGCCATAGCCCTAAACCAAGTGAATCCCAACCAATCCCTATCCCTAT  5305
Falco_peregrinus : GCATCAAAATTTATTAAGAGCAATCGCCCGCTACATCTGCGCAATATATGACAGCAACAAATAGTATAGGCCATAGCCCTAAACCAAGTGAATCCCAACCAATCCCTATCCCTAT  5305
Dromaius_novaeollandiae : GCATCAAAATTTATTAAGAGCAATCGCCCGCTACATCTGCGCAATATATGACAGCAACAAATAGTATAGGCCATAGCCCTAAACCAAGTGAATCCCAACCAATCCCTATCCCTAT  5302
Struthio_camelus : GCATCAAAATTTATTAAGAGCAATCGCCCGCTACATCTGCGCAATATATGACAGCAACAAATAGTATAGGCCATAGCCCTAAACCAAGTGAATCCCAACCAATCCCTATCCCTAT  5305
Apteryx_haastii : GCATCAAAATTTATTAAGAGCAATCGCCCGCTACATCTGCGCAATATATGACAGCAACAAATAGTATAGGCCATAGCCCTAAACCAAGTGAATCCCAACCAATCCCTATCCCTAT  5302
Rhea_americanana : GCATCAAAATTTATTAAGAGCAATCGCCCGCTACATCTGCGCAATATATGACAGCAACAAATAGTATAGGCCATAGCCCTAAACCAAGTGAATCCCAACCAATCCCTATCCCTAT  5305
Gallus_gallus  : GCATCAAAATTTATTAAGAGCAATCGCCCGCTACATCTGCGCAATATATGACAGCAACAAATAGTATAGGCCATAGCCCTAAACCAAGTGAATCCCAACCAATCCCTATCCCTAT  5302
Ciconia_ciconia : GCATCAAAATTTATTAAGAGCAATCGCCCGCTACATCTGCGCAATATATGACAGCAACAAATAGTATAGGCCATAGCCCTAAACCAAGTGAATCCCAACCAATCCCTATCCCTAT  5305
Ciconia_boyciiana : GCATCAAAATTTATTAAGAGCAATCGCCCGCTACATCTGCGCAATATATGACAGCAACAAATAGTATAGGCCATAGCCCTAAACCAAGTGAATCCCAACCAATCCCTATCCCTAT  5305
Iguana_iguana  : GCATCAAAATTTATTAAGAGCAATCGCCCGCTACATCTGCGCAATATATGACAGCAACAAATAGTATAGGCCATAGCCCTAAACCAAGTGAATCCCAACCAATCCCTATCCCTAT  5299
Fumecea_egregius : GCATCAAAATTTATTAAGAGCAATCGCCCGCTACATCTGCGCAATATATGACAGCAACAAATAGTATAGGCCATAGCCCTAAACCAAGTGAATCCCAACCAATCCCTATCCCTAT  5302
Sphenodon_punctatus : GCATCAAAATTTATTAAGAGCAATCGCCCGCTACATCTGCGCAATATATGACAGCAACAAATAGTATAGGCCATAGCCCTAAACCAAGTGAATCCCAACCAATCCCTATCCCTAT  5299
Sceloporus_occidentalis : GCATCAAAATTTATTAAGAGCAATCGCCCGCTACATCTGCGCAATATATGACAGCAACAAATAGTATAGGCCATAGCCCTAAACCAAGTGAATCCCAACCAATCCCTATCCCTAT  5299
Cordylus_warreni : GCATCAAAATTTATTAAGAGCAATCGCCCGCTACATCTGCGCAATATATGACAGCAACAAATAGTATAGGCCATAGCCCTAAACCAAGTGAATCCCAACCAATCCCTATCCCTAT  5311
Abronia_graminea : GCATCAAAATTTATTAAGAGCAATCGCCCGCTACATCTGCGCAATATATGACAGCAACAAATAGTATAGGCCATAGCCCTAAACCAAGTGAATCCCAACCAATCCCTATCCCTAT  5296
Shinisaurus_crocodilurus : GCATCAAAATTTATTAAGAGCAATCGCCCGCTACATCTGCGCAATATATGACAGCAACAAATAGTATAGGCCATAGCCCTAAACCAAGTGAATCCCAACCAATCCCTATCCCTAT  5290
Varanus_komodoensis : GCATCAAAATTTATTAAGAGCAATCGCCCGCTACATCTGCGCAATATATGACAGCAACAAATAGTATAGGCCATAGCCCTAAACCAAGTGAATCCCAACCAATCCCTATCCCTAT  5341
Rhinoceros_floridana : GCATCAAAATTTATTAAGAGCAATCGCCCGCTACATCTGCGCAATATATGACAGCAACAAATAGTATAGGCCATAGCCCTAAACCAAGTGAATCCCAACCAATCCCTATCCCTAT  5284
Geocalamus_acutus : GCATCAAAATTTATTAAGAGCAATCGCCCGCTACATCTGCGCAATATATGACAGCAACAAATAGTATAGGCCATAGCCCTAAACCAAGTGAATCCCAACCAATCCCTATCCCTAT  5275
Diplometopon_zarudnyi : GCATCAAAATTTATTAAGAGCAATCGCCCGCTACATCTGCGCAATATATGACAGCAACAAATAGTATAGGCCATAGCCCTAAACCAAGTGAATCCCAACCAATCCCTATCCCTAT  5281
Amphisbaena_schmidti : GCATCAAAATTTATTAAGAGCAATCGCCCGCTACATCTGCGCAATATATGACAGCAACAAATAGTATAGGCCATAGCCCTAAACCAAGTGAATCCCAACCAATCCCTATCCCTAT  5281
Bipes_tridactylus : GCATCAAAATTTATTAAGAGCAATCGCCCGCTACATCTGCGCAATATATGACAGCAACAAATAGTATAGGCCATAGCCCTAAACCAAGTGAATCCCAACCAATCCCTATCCCTAT  5272
Bipes_canaliculatus : GCATCAAAATTTATTAAGAGCAATCGCCCGCTACATCTGCGCAATATATGACAGCAACAAATAGTATAGGCCATAGCCCTAAACCAAGTGAATCCCAACCAATCCCTATCCCTAT  5284
Bipes_biporus  : GCATCAAAATTTATTAAGAGCAATCGCCCGCTACATCTGCGCAATATATGACAGCAACAAATAGTATAGGCCATAGCCCTAAACCAAGTGAATCCCAACCAATCCCTATCCCTAT  5323
Anolis_carolinensis : GCATCAAAATTTATTAAGAGCAATCGCCCGCTACATCTGCGCAATATATGACAGCAACAAATAGTATAGGCCATAGCCCTAAACCAAGTGAATCCCAACCAATCCCTATCCCTAT  4973
Ophisaurus_atnuatus : GCATCAAAATTTATTAAGAGCAATCGCCCGCTACATCTGCGCAATATATGACAGCAACAAATAGTATAGGCCATAGCCCTAAACCAAGTGAATCCCAACCAATCCCTATCCCTAT  4928
Varanus_salvator : GCATCAAAATTTATTAAGAGCAATCGCCCGCTACATCTGCGCAATATATGACAGCAACAAATAGTATAGGCCATAGCCCTAAACCAAGTGAATCCCAACCAATCCCTATCCCTAT  5334
Mertensiella_luschani : GCATCAAAATTTATTAAGAGCAATCGCCCGCTACATCTGCGCAATATATGACAGCAACAAATAGTATAGGCCATAGCCCTAAACCAAGTGAATCCCAACCAATCCCTATCCCTAT  5314
Xenopus_laevis : GCATCAAAATTTATTAAGAGCAATCGCCCGCTACATCTGCGCAATATATGACAGCAACAAATAGTATAGGCCATAGCCCTAAACCAAGTGAATCCCAACCAATCCCTATCCCTAT  5302

```

0 \* 5740 \* 5760 \* 5780 \* 5800 \* 5820 \* 5840 \*

Bos\_taurus : CCAATAAACCTAGGAGCCATATTATAGCCAAAGCCAGCCGATACCCATGATGATAGGCAGGCTCCAAACAAAATAGGCNCTAAAGGGAGCCACGAGAGTAGCCAAAACAA : 5435  
Hylobates\_lar : TCAACCTAACTGGGCTCCATTTATCTGGCTACCTAGCCATACGGCTACCTCCATCCATGATAGGAGGAGCATCAACTAACTAGGCCAATGGGGCCCTGGAGAGTAGCCAAAACAA : 5444  
Lemur\_catta : TCAATATAAACCTAGGAGCTTTATTATCTAGCCACCCTAGCCATAGCCGTAATCTCAATCTATGATAGGCAGGCTCCAACTAAAATAGGCTTTAAATGGAGCCCTACGAGAGTAGCCAAAACAA : 5441  
Nycticebus\_coucang : TCAACCTAACTAGGAGCTTTATTATCTAGCCACCTAGCCATAGCCGTAATCTCAATCTATGATAGGAGGAGCATCAACTAAAATAGGCTTTAAATGGAGCCCTACGAGAGTAGCCAAAACAA : 5438  
Tarsius\_bancanus : TCAACCTAACTAGGAGCTTTATTATCTAGCCACCTAGCCATAGCCGTAATCTCAATCTATGATAGGAGGAGCATCAACTAAAATAGGCTTTAAATGGAGCCCTACGAGAGTAGCCAAAACAA : 5438  
Gorilla\_gorilla : TCAACCTAACTAGGAGCTTTATTATCTAGCCACCTAGCCATAGCCGTAATCTCAATCTATGATAGGAGGAGCATCAACTAAAATAGGCTTTAAATGGAGCCCTACGAGAGTAGCCAAAACAA : 5444  
Homo\_sapiens : TCAACCTAACTAGGAGCTTTATTATCTAGCCACCTAGCCATAGCCGTAATCTCAATCTATGATAGGAGGAGCATCAACTAAAATAGGCTTTAAATGGAGCCCTACGAGAGTAGCCAAAACAA : 5435  
Papio\_hamadryas : TCAACCTAACTAGGAGCTTTATTATCTAGCCACCTAGCCATAGCCGTAATCTCAATCTATGATAGGAGGAGCATCAACTAAAATAGGCTTTAAATGGAGCCCTACGAGAGTAGCCAAAACAA : 5444  
Cebus\_albifrons : TCAACCTAACTAGGAGCTTTATTATCTAGCCACCTAGCCATAGCCGTAATCTCAATCTATGATAGGAGGAGCATCAACTAAAATAGGCTTTAAATGGAGCCCTACGAGAGTAGCCAAAACAA : 5444  
Macaca\_sylvanus : TCAACCTAACTAGGAGCTTTATTATCTAGCCACCTAGCCATAGCCGTAATCTCAATCTATGATAGGAGGAGCATCAACTAAAATAGGCTTTAAATGGAGCCCTACGAGAGTAGCCAAAACAA : 5441  
Pongo\_pygmaeus : TCAACCTAACTAGGAGCTTTATTATCTAGCCACCTAGCCATAGCCGTAATCTCAATCTATGATAGGAGGAGCATCAACTAAAATAGGCTTTAAATGGAGCCCTACGAGAGTAGCCAAAACAA : 5444  
Pan\_paniscus : TCAACCTAACTAGGAGCTTTATTATCTAGCCACCTAGCCATAGCCGTAATCTCAATCTATGATAGGAGGAGCATCAACTAAAATAGGCTTTAAATGGAGCCCTACGAGAGTAGCCAAAACAA : 5444  
Agkistrodon\_piscivorus : CCAATATAAACCTAGGAGCTTTATTATCTAGCCACCTAGCCATAGCCGTAATCTCAATCTATGATAGGAGGAGCATCAACTAAAATAGGCTTTAAATGGAGCCCTACGAGAGTAGCCAAAACAA : 5453  
Pantherophis\_guttatus : CCAACATAAACCTAGGAGCTTTATTATCTAGCCACCTAGCCATAGCCGTAATCTCAATCTATGATAGGAGGAGCATCAACTAAAATAGGCTTTAAATGGAGCCCTACGAGAGTAGCCAAAACAA : 5453  
Dinodon\_semicarinatus : CCAACATAAACCTAGGAGCTTTATTATCTAGCCACCTAGCCATAGCCGTAATCTCAATCTATGATAGGAGGAGCATCAACTAAAATAGGCTTTAAATGGAGCCCTACGAGAGTAGCCAAAACAA : 5453  
Boa\_constrictor : CCAACATAAACCTAGGAGCTTTATTATCTAGCCACCTAGCCATAGCCGTAATCTCAATCTATGATAGGAGGAGCATCAACTAAAATAGGCTTTAAATGGAGCCCTACGAGAGTAGCCAAAACAA : 5459  
Python\_regius : CCAACATAAACCTAGGAGCTTTATTATCTAGCCACCTAGCCATAGCCGTAATCTCAATCTATGATAGGAGGAGCATCAACTAAAATAGGCTTTAAATGGAGCCCTACGAGAGTAGCCAAAACAA : 5459  
Acrochordus\_granulatus : CCGACATAAACCTAGGAGCTTTATTATCTAGCCACCTAGCCATAGCCGTAATCTCAATCTATGATAGGAGGAGCATCAACTAAAATAGGCTTTAAATGGAGCCCTACGAGAGTAGCCAAAACAA : 5456  
Cylindrophis\_ruffus : CCAACATAAACCTAGGAGCTTTATTATCTAGCCACCTAGCCATAGCCGTAATCTCAATCTATGATAGGAGGAGCATCAACTAAAATAGGCTTTAAATGGAGCCCTACGAGAGTAGCCAAAACAA : 5423  
Ovophis\_okinavensis : CCAACATAAACCTAGGAGCTTTATTATCTAGCCACCTAGCCATAGCCGTAATCTCAATCTATGATAGGAGGAGCATCAACTAAAATAGGCTTTAAATGGAGCCCTACGAGAGTAGCCAAAACAA : 5453  
Xenopeltis\_unicolor : CCAACATAAACCTAGGAGCTTTATTATCTAGCCACCTAGCCATAGCCGTAATCTCAATCTATGATAGGAGGAGCATCAACTAAAATAGGCTTTAAATGGAGCCCTACGAGAGTAGCCAAAACAA : 5462  
Typhlops\_reticulatus : CCAACATAAACCTAGGAGCTTTATTATCTAGCCACCTAGCCATAGCCGTAATCTCAATCTATGATAGGAGGAGCATCAACTAAAATAGGCTTTAAATGGAGCCCTACGAGAGTAGCCAAAACAA : 5387  
Leptotyphlops\_dulcis : CCAACATAAACCTAGGAGCTTTATTATCTAGCCACCTAGCCATAGCCGTAATCTCAATCTATGATAGGAGGAGCATCAACTAAAATAGGCTTTAAATGGAGCCCTACGAGAGTAGCCAAAACAA : 5406  
Caiman\_crocodilus : TCAACCTAACTAGGAGCTTTATTATCTAGCCACCTAGCCATAGCCGTAATCTCAATCTATGATAGGAGGAGCATCAACTAAAATAGGCTTTAAATGGAGCCCTACGAGAGTAGCCAAAACAA : 5465  
Alligator\_sinensis : CCGACCTAAACCTAGGAGCTTTATTATCTAGCCACCTAGCCATAGCCGTAATCTCAATCTATGATAGGAGGAGCATCAACTAAAATAGGCTTTAAATGGAGCCCTACGAGAGTAGCCAAAACAA : 5495  
Alligator\_mississippiensis : CCGACCTAAACCTAGGAGCTTTATTATCTAGCCACCTAGCCATAGCCGTAATCTCAATCTATGATAGGAGGAGCATCAACTAAAATAGGCTTTAAATGGAGCCCTACGAGAGTAGCCAAAACAA : 5444  
Gavialis\_gangeticus : CCAACCTAAACCTAGGAGCTTTATTATCTAGCCACCTAGCCATAGCCGTAATCTCAATCTATGATAGGAGGAGCATCAACTAAAATAGGCTTTAAATGGAGCCCTACGAGAGTAGCCAAAACAA : 5513  
Crocodylus\_moreletii : CCAACCTAAACCTAGGAGCTTTATTATCTAGCCACCTAGCCATAGCCGTAATCTCAATCTATGATAGGAGGAGCATCAACTAAAATAGGCTTTAAATGGAGCCCTACGAGAGTAGCCAAAACAA : 5489  
Dogania\_subplana : CCAACCTAAACCTAGGAGCTTTATTATCTAGCCACCTAGCCATAGCCGTAATCTCAATCTATGATAGGAGGAGCATCAACTAAAATAGGCTTTAAATGGAGCCCTACGAGAGTAGCCAAAACAA : 5414  
Pelomedusa\_subrufa : CCGACCTAAACCTAGGAGCTTTATTATCTAGCCACCTAGCCATAGCCGTAATCTCAATCTATGATAGGAGGAGCATCAACTAAAATAGGCTTTAAATGGAGCCCTACGAGAGTAGCCAAAACAA : 5432  
Chrysemys\_picta : CCGACCTAAACCTAGGAGCTTTATTATCTAGCCACCTAGCCATAGCCGTAATCTCAATCTATGATAGGAGGAGCATCAACTAAAATAGGCTTTAAATGGAGCCCTACGAGAGTAGCCAAAACAA : 5450  
Chelonia\_mydas : CCGACCTAAACCTAGGAGCTTTATTATCTAGCCACCTAGCCATAGCCGTAATCTCAATCTATGATAGGAGGAGCATCAACTAAAATAGGCTTTAAATGGAGCCCTACGAGAGTAGCCAAAACAA : 5453  
Tinamus\_major : CCGACCTAAACCTAGGAGCTTTATTATCTAGCCACCTAGCCATAGCCGTAATCTCAATCTATGATAGGAGGAGCATCAACTAAAATAGGCTTTAAATGGAGCCCTACGAGAGTAGCCAAAACAA : 5429  
Smithornis\_sharpei : CCGACCTAAACCTAGGAGCTTTATTATCTAGCCACCTAGCCATAGCCGTAATCTCAATCTATGATAGGAGGAGCATCAACTAAAATAGGCTTTAAATGGAGCCCTACGAGAGTAGCCAAAACAA : 5435  
Corvus\_frugilegus : CCGACCTAAACCTAGGAGCTTTATTATCTAGCCACCTAGCCATAGCCGTAATCTCAATCTATGATAGGAGGAGCATCAACTAAAATAGGCTTTAAATGGAGCCCTACGAGAGTAGCCAAAACAA : 5438  
Vidua\_chalybeata : CCGACCTAAACCTAGGAGCTTTATTATCTAGCCACCTAGCCATAGCCGTAATCTCAATCTATGATAGGAGGAGCATCAACTAAAATAGGCTTTAAATGGAGCCCTACGAGAGTAGCCAAAACAA : 5438  
Buteo\_buteo : CCGACCTAAACCTAGGAGCTTTATTATCTAGCCACCTAGCCATAGCCGTAATCTCAATCTATGATAGGAGGAGCATCAACTAAAATAGGCTTTAAATGGAGCCCTACGAGAGTAGCCAAAACAA : 5438  
Falco\_peregrinus : CCGACCTAAACCTAGGAGCTTTATTATCTAGCCACCTAGCCATAGCCGTAATCTCAATCTATGATAGGAGGAGCATCAACTAAAATAGGCTTTAAATGGAGCCCTACGAGAGTAGCCAAAACAA : 5438  
Dromaius\_novaeollandiae : CCGACCTAAACCTAGGAGCTTTATTATCTAGCCACCTAGCCATAGCCGTAATCTCAATCTATGATAGGAGGAGCATCAACTAAAATAGGCTTTAAATGGAGCCCTACGAGAGTAGCCAAAACAA : 5435  
Struthio\_camelus : CCGACCTAAACCTAGGAGCTTTATTATCTAGCCACCTAGCCATAGCCGTAATCTCAATCTATGATAGGAGGAGCATCAACTAAAATAGGCTTTAAATGGAGCCCTACGAGAGTAGCCAAAACAA : 5438  
Apteryx\_haastii : CCGACCTAAACCTAGGAGCTTTATTATCTAGCCACCTAGCCATAGCCGTAATCTCAATCTATGATAGGAGGAGCATCAACTAAAATAGGCTTTAAATGGAGCCCTACGAGAGTAGCCAAAACAA : 5435  
Rhea\_americanana : CCGACCTAAACCTAGGAGCTTTATTATCTAGCCACCTAGCCATAGCCGTAATCTCAATCTATGATAGGAGGAGCATCAACTAAAATAGGCTTTAAATGGAGCCCTACGAGAGTAGCCAAAACAA : 5438  
Gallus\_gallus : CCGACCTAAACCTAGGAGCTTTATTATCTAGCCACCTAGCCATAGCCGTAATCTCAATCTATGATAGGAGGAGCATCAACTAAAATAGGCTTTAAATGGAGCCCTACGAGAGTAGCCAAAACAA : 5435  
Ciconia\_ciconia : CCGACCTAAACCTAGGAGCTTTATTATCTAGCCACCTAGCCATAGCCGTAATCTCAATCTATGATAGGAGGAGCATCAACTAAAATAGGCTTTAAATGGAGCCCTACGAGAGTAGCCAAAACAA : 5438  
Ciconia\_boyciniana : CCGACCTAAACCTAGGAGCTTTATTATCTAGCCACCTAGCCATAGCCGTAATCTCAATCTATGATAGGAGGAGCATCAACTAAAATAGGCTTTAAATGGAGCCCTACGAGAGTAGCCAAAACAA : 5438  
Iguana\_iguana : CCGACCTAAACCTAGGAGCTTTATTATCTAGCCACCTAGCCATAGCCGTAATCTCAATCTATGATAGGAGGAGCATCAACTAAAATAGGCTTTAAATGGAGCCCTACGAGAGTAGCCAAAACAA : 5432  
Fumeaces\_egregius : CCGACCTAAACCTAGGAGCTTTATTATCTAGCCACCTAGCCATAGCCGTAATCTCAATCTATGATAGGAGGAGCATCAACTAAAATAGGCTTTAAATGGAGCCCTACGAGAGTAGCCAAAACAA : 5435  
Sphenodon\_punctatus : CCGACCTAAACCTAGGAGCTTTATTATCTAGCCACCTAGCCATAGCCGTAATCTCAATCTATGATAGGAGGAGCATCAACTAAAATAGGCTTTAAATGGAGCCCTACGAGAGTAGCCAAAACAA : 5432  
Sceloporus\_occidentalis : CCGACCTAAACCTAGGAGCTTTATTATCTAGCCACCTAGCCATAGCCGTAATCTCAATCTATGATAGGAGGAGCATCAACTAAAATAGGCTTTAAATGGAGCCCTACGAGAGTAGCCAAAACAA : 5432  
Abronia\_graminea : CCGACCTAAACCTAGGAGCTTTATTATCTAGCCACCTAGCCATAGCCGTAATCTCAATCTATGATAGGAGGAGCATCAACTAAAATAGGCTTTAAATGGAGCCCTACGAGAGTAGCCAAAACAA : 5444  
Shinisaurus\_crocodilurus : CCGACCTAAACCTAGGAGCTTTATTATCTAGCCACCTAGCCATAGCCGTAATCTCAATCTATGATAGGAGGAGCATCAACTAAAATAGGCTTTAAATGGAGCCCTACGAGAGTAGCCAAAACAA : 5423  
Varanus\_komodoensis : CCGACCTAAACCTAGGAGCTTTATTATCTAGCCACCTAGCCATAGCCGTAATCTCAATCTATGATAGGAGGAGCATCAACTAAAATAGGCTTTAAATGGAGCCCTACGAGAGTAGCCAAAACAA : 5474  
Rhineura\_floridana : CCGACCTAAACCTAGGAGCTTTATTATCTAGCCACCTAGCCATAGCCGTAATCTCAATCTATGATAGGAGGAGCATCAACTAAAATAGGCTTTAAATGGAGCCCTACGAGAGTAGCCAAAACAA : 5417  
Geocalamus\_acutus : CCGACCTAAACCTAGGAGCTTTATTATCTAGCCACCTAGCCATAGCCGTAATCTCAATCTATGATAGGAGGAGCATCAACTAAAATAGGCTTTAAATGGAGCCCTACGAGAGTAGCCAAAACAA : 5408  
Diplometopon\_zarudnyi : CCAACATAAACCTAGGAGCTTTATTATCTAGCCACCTAGCCATAGCCGTAATCTCAATCTATGATAGGAGGAGCATCAACTAAAATAGGCTTTAAATGGAGCCCTACGAGAGTAGCCAAAACAA : 5414  
Amphisbaena\_schmidti : CCGACCTAAACCTAGGAGCTTTATTATCTAGCCACCTAGCCATAGCCGTAATCTCAATCTATGATAGGAGGAGCATCAACTAAAATAGGCTTTAAATGGAGCCCTACGAGAGTAGCCAAAACAA : 5414  
Bipes\_tridactylus : CCAACCTAAATAGGAGCTTTATTATCTAGCCACCTAGCCATAGCCGTAATCTCAATCTATGATAGGAGGAGCATCAACTAAAATAGGCTTTAAATGGAGCCCTACGAGAGTAGCCAAAACAA : 5405  
Bipes\_banaliculatus : CCGACCTAAACCTAGGAGCTTTATTATCTAGCCACCTAGCCATAGCCGTAATCTCAATCTATGATAGGAGGAGCATCAACTAAAATAGGCTTTAAATGGAGCCCTACGAGAGTAGCCAAAACAA : 5417  
Bipes\_biporus : CCGACCTAAACCTAGGAGCTTTATTATCTAGCCACCTAGCCATAGCCGTAATCTCAATCTATGATAGGAGGAGCATCAACTAAAATAGGCTTTAAATGGAGCCCTACGAGAGTAGCCAAAACAA : 5456  
Anolis\_carolinensis : CCGACCTAAACCTAGGAGCTTTATTATCTAGCCACCTAGCCATAGCCGTAATCTCAATCTATGATAGGAGGAGCATCAACTAAAATAGGCTTTAAATGGAGCCCTACGAGAGTAGCCAAAACAA : 5106  
Ophisaurus\_atnuatus : CCGACCTAAACCTAGGAGCTTTATTATCTAGCCACCTAGCCATAGCCGTAATCTCAATCTATGATAGGAGGAGCATCAACTAAAATAGGCTTTAAATGGAGCCCTACGAGAGTAGCCAAAACAA : 5061  
Varanus\_salvator : CCGACCTAAACCTAGGAGCTTTATTATCTAGCCACCTAGCCATAGCCGTAATCTCAATCTATGATAGGAGGAGCATCAACTAAAATAGGCTTTAAATGGAGCCCTACGAGAGTAGCCAAAACAA : 5467  
Mertensiella\_luschani : CCAACCTAAACCTAGGAGCTTTATTATCTAGCCACCTAGCCATAGCCGTAATCTCAATCTATGATAGGAGGAGCATCAACTAAAATAGGCTTTAAATGGAGCCCTACGAGAGTAGCCAAAACAA : 5447  
Xenopus\_laevis : CCGACCTAAACCTAGGAGCTTTATTATCTAGCCACCTAGCCATAGCCGTAATCTCAATCTATGATAGGAGGAGCATCAACTAAAATAGGCTTTAAATGGAGCCCTACGAGAGTAGCCAAAACAA : 5435



|                            | * | 6000                                                                                                                            | * | 6020 | * | 6040 | * | 6060 | * | 6080 | * | 6100 | * | 61 |
|----------------------------|---|---------------------------------------------------------------------------------------------------------------------------------|---|------|---|------|---|------|---|------|---|------|---|----|
| Bos_taurus                 | : | CGATTACCTCAACACTAGCAGAAACAAACCGGCGCCCATTTGACCTTAAAGAGAGGAGAAATNGAGTAGTCTGGGCTCAACCTAGAAATAGACAGGACCAATGGCCCTATTTCTATAGAGAGAGTAC | : | 5701 |   |      |   |      |   |      |   |      |   |    |
| Hylobates_lar              | : | TGATTATCTCAACACTAGCAGAAACAAACCGAAGCCCTTTGACCTTAAAGAGAGGAGAAATNGAATAGTCTGGGCTCAACCTAGAAATAGACAGGACCAATGGCCCTATTTCTATAGAGAGTAC    | : | 5710 |   |      |   |      |   |      |   |      |   |    |
| Lemur_catta                | : | TGATTATCTCAACACTAGCAGAAACAAACCGGCCCCATTTGACCTTAAAGAGAGGAGAAATNGAATAGTCTGGGCTCAACCTAGAAATAGACAGGACCAATGGCCCTATTTCTATAGAGAGTAC    | : | 5707 |   |      |   |      |   |      |   |      |   |    |
| Nycticebus_coucang         | : | TGATTATCTCAACACTAGCAGAAACAAACCGGCTCCCTTTGACCTTAAAGAGAGGAGAAATNGAATAGTCTGGGCTCAACCTAGAAATAGACAGGACCAATGGCCCTATTTCTATAGAGAGTAC    | : | 5704 |   |      |   |      |   |      |   |      |   |    |
| Tarsius_bancanus           | : | TGATTATCTCAACACTAGCAGAAACAAACCGGACCCCTTTGACCTTAAAGAGAGGAGAAATNGAATAGTCTGGGCTCAACCTAGAAATAGACAGGACCAATGGCCCTATTTCTATAGAGAGTAC    | : | 5704 |   |      |   |      |   |      |   |      |   |    |
| Gorilla_gorilla            | : | TGATTATCTCAACACTAGCAGAAACAAACCGGACCCCTTTGACCTTAAAGAGAGGAGAAATNGAATAGTCTGGGCTCAACCTAGAAATAGACAGGACCAATGGCCCTATTTCTATAGAGAGTAC    | : | 5710 |   |      |   |      |   |      |   |      |   |    |
| Homo_sapiens               | : | TGATTATCTCAACACTAGCAGAAACAAACCGAAGCCCTTTGACCTTAAAGAGAGGAGAAATNGAATAGTCTGGGCTCAACCTAGAAATAGACAGGACCAATGGCCCTATTTCTATAGAGAGTAC    | : | 5701 |   |      |   |      |   |      |   |      |   |    |
| Papio_hamadryas            | : | TGATTATCTCAACACTAGCAGAAACAAACCGAAGCCCTTTGACCTTAAAGAGAGGAGAAATNGAATAGTCTGGGCTCAACCTAGAAATAGACAGGACCAATGGCCCTATTTCTATAGAGAGTAC    | : | 5710 |   |      |   |      |   |      |   |      |   |    |
| Cebus_albifrons            | : | TGATTATCTCAACACTAGCAGAAACAAACCGGAGCCCTTTGACCTTAAAGAGAGGAGAAATNGAATAGTCTGGGCTCAACCTAGAAATAGACAGGACCAATGGCCCTATTTCTATAGAGAGTAC    | : | 5710 |   |      |   |      |   |      |   |      |   |    |
| Macaca_sylvanus            | : | TGATTATCTCAACACTAGCAGAAACAAACCGAAGCCCTTTGACCTTAAAGAGAGGAGAAATNGAATAGTCTGGGCTCAACCTAGAAATAGACAGGACCAATGGCCCTATTTCTATAGAGAGTAC    | : | 5707 |   |      |   |      |   |      |   |      |   |    |
| Pongo_pygmaeus             | : | TGATTATCTCAACACTAGCAGAAACAAACCGGACCCCTTTGACCTTAAAGAGAGGAGAAATNGAATAGTCTGGGCTCAACCTAGAAATAGACAGGACCAATGGCCCTATTTCTATAGAGAGTAC    | : | 5710 |   |      |   |      |   |      |   |      |   |    |
| Pan_paniscus               | : | TGATTATCTCAACACTAGCAGAAACAAACCGGACCCCTTTGACCTTAAAGAGAGGAGAAATNGAATAGTCTGGGCTCAACCTAGAAATAGACAGGACCAATGGCCCTATTTCTATAGAGAGTAC    | : | 5710 |   |      |   |      |   |      |   |      |   |    |
| Agkistrodon_piscivorus     | : | TGATTATCTCAACACTAGCAGAAACAAACCGGACCCCTTTGACCTTAAAGAGAGGAGAAATNGAATAGTCTGGGCTCAACCTAGAAATAGACAGGACCAATGGCCCTATTTCTATAGAGAGTAC    | : | 5719 |   |      |   |      |   |      |   |      |   |    |
| Pantherophis_guttatus      | : | TGATTATCTCAACACTAGCAGAAACAAACCGGACCCCTTTGACCTTAAAGAGAGGAGAAATNGAATAGTCTGGGCTCAACCTAGAAATAGACAGGACCAATGGCCCTATTTCTATAGAGAGTAC    | : | 5719 |   |      |   |      |   |      |   |      |   |    |
| Dinodon_semicarinatus      | : | TGATTATCTCAACACTAGCAGAAACAAACCGGACCCCTTTGACCTTAAAGAGAGGAGAAATNGAATAGTCTGGGCTCAACCTAGAAATAGACAGGACCAATGGCCCTATTTCTATAGAGAGTAC    | : | 5719 |   |      |   |      |   |      |   |      |   |    |
| Boa_constrictor            | : | TGATTATCTCAACACTAGCAGAAACAAACCGGACCCCTTTGACCTTAAAGAGAGGAGAAATNGAATAGTCTGGGCTCAACCTAGAAATAGACAGGACCAATGGCCCTATTTCTATAGAGAGTAC    | : | 5725 |   |      |   |      |   |      |   |      |   |    |
| Python_regius              | : | TGATTATCTCAACACTAGCAGAAACAAACCGGACCCCTTTGACCTTAAAGAGAGGAGAAATNGAATAGTCTGGGCTCAACCTAGAAATAGACAGGACCAATGGCCCTATTTCTATAGAGAGTAC    | : | 5725 |   |      |   |      |   |      |   |      |   |    |
| Acrochordus_granulatus     | : | TGATTATCTCAACACTAGCAGAAACAAACCGGACCCCTTTGACCTTAAAGAGAGGAGAAATNGAATAGTCTGGGCTCAACCTAGAAATAGACAGGACCAATGGCCCTATTTCTATAGAGAGTAC    | : | 5722 |   |      |   |      |   |      |   |      |   |    |
| Cylindrophis_ruffus        | : | TGATTATCTCAACACTAGCAGAAACAAACCGGACCCCTTTGACCTTAAAGAGAGGAGAAATNGAATAGTCTGGGCTCAACCTAGAAATAGACAGGACCAATGGCCCTATTTCTATAGAGAGTAC    | : | 5689 |   |      |   |      |   |      |   |      |   |    |
| Ovophis_okinavensis        | : | TGATTATCTCAACACTAGCAGAAACAAACCGGACCCCTTTGACCTTAAAGAGAGGAGAAATNGAATAGTCTGGGCTCAACCTAGAAATAGACAGGACCAATGGCCCTATTTCTATAGAGAGTAC    | : | 5719 |   |      |   |      |   |      |   |      |   |    |
| Xenopeltis_unicolor        | : | TGATTATCTCAACACTAGCAGAAACAAACCGGACCCCTTTGACCTTAAAGAGAGGAGAAATNGAATAGTCTGGGCTCAACCTAGAAATAGACAGGACCAATGGCCCTATTTCTATAGAGAGTAC    | : | 5728 |   |      |   |      |   |      |   |      |   |    |
| Typhlops_reticulatus       | : | TGATTATCTCAACACTAGCAGAAACAAACCGGACCCCTTTGACCTTAAAGAGAGGAGAAATNGAATAGTCTGGGCTCAACCTAGAAATAGACAGGACCAATGGCCCTATTTCTATAGAGAGTAC    | : | 5653 |   |      |   |      |   |      |   |      |   |    |
| Leptotyphlops_dulcis       | : | TGATTATCTCAACACTAGCAGAAACAAACCGGACCCCTTTGACCTTAAAGAGAGGAGAAATNGAATAGTCTGGGCTCAACCTAGAAATAGACAGGACCAATGGCCCTATTTCTATAGAGAGTAC    | : | 5672 |   |      |   |      |   |      |   |      |   |    |
| Caiman_crocodilus          | : | TGATTATCTCAACACTAGCAGAAACAAACCGGACCCCTTTGACCTTAAAGAGAGGAGAAATNGAATAGTCTGGGCTCAACCTAGAAATAGACAGGACCAATGGCCCTATTTCTATAGAGAGTAC    | : | 5731 |   |      |   |      |   |      |   |      |   |    |
| Alligator_sinensis         | : | TGATTATCTCAACACTAGCAGAAACAAACCGGACCCCTTTGACCTTAAAGAGAGGAGAAATNGAATAGTCTGGGCTCAACCTAGAAATAGACAGGACCAATGGCCCTATTTCTATAGAGAGTAC    | : | 5761 |   |      |   |      |   |      |   |      |   |    |
| Alligator_mississippiensis | : | TGATTATCTCAACACTAGCAGAAACAAACCGGACCCCTTTGACCTTAAAGAGAGGAGAAATNGAATAGTCTGGGCTCAACCTAGAAATAGACAGGACCAATGGCCCTATTTCTATAGAGAGTAC    | : | 5710 |   |      |   |      |   |      |   |      |   |    |
| Gavialis_gangeticus        | : | TGATTATCTCAACACTAGCAGAAACAAACCGGACCCCTTTGACCTTAAAGAGAGGAGAAATNGAATAGTCTGGGCTCAACCTAGAAATAGACAGGACCAATGGCCCTATTTCTATAGAGAGTAC    | : | 5779 |   |      |   |      |   |      |   |      |   |    |
| Crocodylus_moreletii       | : | TGATTATCTCAACACTAGCAGAAACAAACCGGACCCCTTTGACCTTAAAGAGAGGAGAAATNGAATAGTCTGGGCTCAACCTAGAAATAGACAGGACCAATGGCCCTATTTCTATAGAGAGTAC    | : | 5755 |   |      |   |      |   |      |   |      |   |    |
| Dogania_subplana           | : | TGATTATCTCAACACTAGCAGAAACAAACCGGACCCCTTTGACCTTAAAGAGAGGAGAAATNGAATAGTCTGGGCTCAACCTAGAAATAGACAGGACCAATGGCCCTATTTCTATAGAGAGTAC    | : | 5680 |   |      |   |      |   |      |   |      |   |    |
| Pelomedusa_subrufa         | : | TGATTATCTCAACACTAGCAGAAACAAACCGGACCCCTTTGACCTTAAAGAGAGGAGAAATNGAATAGTCTGGGCTCAACCTAGAAATAGACAGGACCAATGGCCCTATTTCTATAGAGAGTAC    | : | 5698 |   |      |   |      |   |      |   |      |   |    |
| Chrysemys_picta            | : | TGATTATCTCAACACTAGCAGAAACAAACCGGACCCCTTTGACCTTAAAGAGAGGAGAAATNGAATAGTCTGGGCTCAACCTAGAAATAGACAGGACCAATGGCCCTATTTCTATAGAGAGTAC    | : | 5716 |   |      |   |      |   |      |   |      |   |    |
| Chelonia_mydas             | : | TGATTATCTCAACACTAGCAGAAACAAACCGGACCCCTTTGACCTTAAAGAGAGGAGAAATNGAATAGTCTGGGCTCAACCTAGAAATAGACAGGACCAATGGCCCTATTTCTATAGAGAGTAC    | : | 5719 |   |      |   |      |   |      |   |      |   |    |
| Tinamus_major              | : | TGATTATCTCAACACTAGCAGAAACAAACCGGACCCCTTTGACCTTAAAGAGAGGAGAAATNGAATAGTCTGGGCTCAACCTAGAAATAGACAGGACCAATGGCCCTATTTCTATAGAGAGTAC    | : | 5695 |   |      |   |      |   |      |   |      |   |    |
| Smithornis_sharpei         | : | TGATTATCTCAACACTAGCAGAAACAAACCGGACCCCTTTGACCTTAAAGAGAGGAGAAATNGAATAGTCTGGGCTCAACCTAGAAATAGACAGGACCAATGGCCCTATTTCTATAGAGAGTAC    | : | 5701 |   |      |   |      |   |      |   |      |   |    |
| Corvus_frugilegus          | : | TGATTATCTCAACACTAGCAGAAACAAACCGGACCCCTTTGACCTTAAAGAGAGGAGAAATNGAATAGTCTGGGCTCAACCTAGAAATAGACAGGACCAATGGCCCTATTTCTATAGAGAGTAC    | : | 5704 |   |      |   |      |   |      |   |      |   |    |
| Vidua_chalybeata           | : | TGATTATCTCAACACTAGCAGAAACAAACCGGACCCCTTTGACCTTAAAGAGAGGAGAAATNGAATAGTCTGGGCTCAACCTAGAAATAGACAGGACCAATGGCCCTATTTCTATAGAGAGTAC    | : | 5704 |   |      |   |      |   |      |   |      |   |    |
| Buteo_buteo                | : | TGATTATCTCAACACTAGCAGAAACAAACCGGACCCCTTTGACCTTAAAGAGAGGAGAAATNGAATAGTCTGGGCTCAACCTAGAAATAGACAGGACCAATGGCCCTATTTCTATAGAGAGTAC    | : | 5704 |   |      |   |      |   |      |   |      |   |    |
| Falco_peregrinus           | : | TGATTATCTCAACACTAGCAGAAACAAACCGGACCCCTTTGACCTTAAAGAGAGGAGAAATNGAATAGTCTGGGCTCAACCTAGAAATAGACAGGACCAATGGCCCTATTTCTATAGAGAGTAC    | : | 5704 |   |      |   |      |   |      |   |      |   |    |
| Dromaius_novaeollandiae    | : | TGATTATCTCAACACTAGCAGAAACAAACCGGACCCCTTTGACCTTAAAGAGAGGAGAAATNGAATAGTCTGGGCTCAACCTAGAAATAGACAGGACCAATGGCCCTATTTCTATAGAGAGTAC    | : | 5701 |   |      |   |      |   |      |   |      |   |    |
| Struthio_camelus           | : | TGATTATCTCAACACTAGCAGAAACAAACCGGACCCCTTTGACCTTAAAGAGAGGAGAAATNGAATAGTCTGGGCTCAACCTAGAAATAGACAGGACCAATGGCCCTATTTCTATAGAGAGTAC    | : | 5704 |   |      |   |      |   |      |   |      |   |    |
| Apteryx_haastii            | : | TGATTATCTCAACACTAGCAGAAACAAACCGGACCCCTTTGACCTTAAAGAGAGGAGAAATNGAATAGTCTGGGCTCAACCTAGAAATAGACAGGACCAATGGCCCTATTTCTATAGAGAGTAC    | : | 5701 |   |      |   |      |   |      |   |      |   |    |
| Rhea_americanana           | : | TGATTATCTCAACACTAGCAGAAACAAACCGGACCCCTTTGACCTTAAAGAGAGGAGAAATNGAATAGTCTGGGCTCAACCTAGAAATAGACAGGACCAATGGCCCTATTTCTATAGAGAGTAC    | : | 5704 |   |      |   |      |   |      |   |      |   |    |
| Gallus_gallus              | : | TGATTATCTCAACACTAGCAGAAACAAACCGGACCCCTTTGACCTTAAAGAGAGGAGAAATNGAATAGTCTGGGCTCAACCTAGAAATAGACAGGACCAATGGCCCTATTTCTATAGAGAGTAC    | : | 5701 |   |      |   |      |   |      |   |      |   |    |
| Ciconia_ciconia            | : | TGATTATCTCAACACTAGCAGAAACAAACCGGACCCCTTTGACCTTAAAGAGAGGAGAAATNGAATAGTCTGGGCTCAACCTAGAAATAGACAGGACCAATGGCCCTATTTCTATAGAGAGTAC    | : | 5704 |   |      |   |      |   |      |   |      |   |    |
| Ciconia_boyciiana          | : | TGATTATCTCAACACTAGCAGAAACAAACCGGACCCCTTTGACCTTAAAGAGAGGAGAAATNGAATAGTCTGGGCTCAACCTAGAAATAGACAGGACCAATGGCCCTATTTCTATAGAGAGTAC    | : | 5704 |   |      |   |      |   |      |   |      |   |    |
| Iguana_iguana              | : | TGATTATCTCAACACTAGCAGAAACAAACCGGACCCCTTTGACCTTAAAGAGAGGAGAAATNGAATAGTCTGGGCTCAACCTAGAAATAGACAGGACCAATGGCCCTATTTCTATAGAGAGTAC    | : | 5698 |   |      |   |      |   |      |   |      |   |    |
| Eumeces_egregius           | : | TGATTATCTCAACACTAGCAGAAACAAACCGGACCCCTTTGACCTTAAAGAGAGGAGAAATNGAATAGTCTGGGCTCAACCTAGAAATAGACAGGACCAATGGCCCTATTTCTATAGAGAGTAC    | : | 5701 |   |      |   |      |   |      |   |      |   |    |
| Sphenodon_punctatus        | : | TGATTATCTCAACACTAGCAGAAACAAACCGGACCCCTTTGACCTTAAAGAGAGGAGAAATNGAATAGTCTGGGCTCAACCTAGAAATAGACAGGACCAATGGCCCTATTTCTATAGAGAGTAC    | : | 5698 |   |      |   |      |   |      |   |      |   |    |
| Sceloporus_occidentalis    | : | TGATTATCTCAACACTAGCAGAAACAAACCGGACCCCTTTGACCTTAAAGAGAGGAGAAATNGAATAGTCTGGGCTCAACCTAGAAATAGACAGGACCAATGGCCCTATTTCTATAGAGAGTAC    | : | 5698 |   |      |   |      |   |      |   |      |   |    |
| Cordylus_warreni           | : | TGATTATCTCAACACTAGCAGAAACAAACCGGACCCCTTTGACCTTAAAGAGAGGAGAAATNGAATAGTCTGGGCTCAACCTAGAAATAGACAGGACCAATGGCCCTATTTCTATAGAGAGTAC    | : | 5710 |   |      |   |      |   |      |   |      |   |    |
| Abronia_graminea           | : | TGATTATCTCAACACTAGCAGAAACAAACCGGACCCCTTTGACCTTAAAGAGAGGAGAAATNGAATAGTCTGGGCTCAACCTAGAAATAGACAGGACCAATGGCCCTATTTCTATAGAGAGTAC    | : | 5695 |   |      |   |      |   |      |   |      |   |    |
| Shinisaurus_crocodilurus   | : | TGATTATCTCAACACTAGCAGAAACAAACCGGACCCCTTTGACCTTAAAGAGAGGAGAAATNGAATAGTCTGGGCTCAACCTAGAAATAGACAGGACCAATGGCCCTATTTCTATAGAGAGTAC    | : | 5689 |   |      |   |      |   |      |   |      |   |    |
| Varanus_komodoensis        | : | TGATTATCTCAACACTAGCAGAAACAAACCGGACCCCTTTGACCTTAAAGAGAGGAGAAATNGAATAGTCTGGGCTCAACCTAGAAATAGACAGGACCAATGGCCCTATTTCTATAGAGAGTAC    | : | 5740 |   |      |   |      |   |      |   |      |   |    |
| Rhineura_floridana         | : | TGATTATCTCAACACTAGCAGAAACAAACCGGACCCCTTTGACCTTAAAGAGAGGAGAAATNGAATAGTCTGGGCTCAACCTAGAAATAGACAGGACCAATGGCCCTATTTCTATAGAGAGTAC    | : | 5683 |   |      |   |      |   |      |   |      |   |    |
| Geocalamus_acutus          | : | TGATTATCTCAACACTAGCAGAAACAAACCGGACCCCTTTGACCTTAAAGAGAGGAGAAATNGAATAGTCTGGGCTCAACCTAGAAATAGACAGGACCAATGGCCCTATTTCTATAGAGAGTAC    | : | 5674 |   |      |   |      |   |      |   |      |   |    |
| Diplometopon_zarudnyi      | : | TGATTATCTCAACACTAGCAGAAACAAACCGGACCCCTTTGACCTTAAAGAGAGGAGAAATNGAATAGTCTGGGCTCAACCTAGAAATAGACAGGACCAATGGCCCTATTTCTATAGAGAGTAC    | : | 5680 |   |      |   |      |   |      |   |      |   |    |
| Amphisbaena_schmidti       | : | TGATTATCTCAACACTAGCAGAAACAAACCGGACCCCTTTGACCTTAAAGAGAGGAGAAATNGAATAGTCTGGGCTCAACCTAGAAATAGACAGGACCAATGGCCCTATTTCTATAGAGAGTAC    | : | 5680 |   |      |   |      |   |      |   |      |   |    |
| Bipes_tridactylus          | : | TGATTATCTCAACACTAGCAGAAACAAACCGGACCCCTTTGACCTTAAAGAGAGGAGAAATNGAATAGTCTGGGCTCAACCTAGAAATAGACAGGACCAATGGCCCTATTTCTATAGAGAGTAC    | : | 5671 |   |      |   |      |   |      |   |      |   |    |
| Bipes_canaliculatus        | : | TGATTATCTCAACACTAGCAGAAACAAACCGGACCCCTTTGACCTTAAAGAGAGGAGAAATNGAATAGTCTGGGCTCAACCTAGAAATAGACAGGACCAATGGCCCTATTTCTATAGAGAGTAC    | : | 5683 |   |      |   |      |   |      |   |      |   |    |
| Bipes_biporus              | : | TGATTATCTCAACACTAGCAGAAACAAACCGGACCCCTTTGACCTTAAAGAGAGGAGAAATNGAATAGTCTGGGCTCAACCTAGAAATAGACAGGACCAATGGCCCTATTTCTATAGAGAGTAC    | : | 5722 |   |      |   |      |   |      |   |      |   |    |
| Anolis_carolinensis        | : | TGATTATCTCAACACTAGCAGAAACAAACCGGACCCCTTTGACCTTAAAGAGAGGAGAAATNGAATAGTCTGGGCTCAACCTAGAAATAGACAGGACCAATGGCCCTATTTCTATAGAGAGTAC    | : | 5371 |   |      |   |      |   |      |   |      |   |    |
| Ophisaurus_atnuatus        | : | TGATTATCTCAACACTAGCAGAAACAAACCGGACCCCTTTGACCTTAAAGAGAGGAGAAATNGAATAGTCTGGGCTCAACCTAGAAATAGACAGGACCAATGGCCCTATTTCTATAGAGAGTAC    | : | 5327 |   |      |   |      |   |      |   |      |   |    |
| Varanus_salvator           | : | TGATTATCTCAACACTAGCAGAAACAAACCGGACCCCTTTGACCTTAAAGAGAGGAGAAATNGAATAGTCTGGGCTCAACCTAGAAATAGACAGGACCAATGGCCCTATTTCTATAGAGAGTAC    | : | 5732 |   |      |   |      |   |      |   |      |   |    |
| Mertensiella_luschani      | : | TGATTATCTCAACACTAGCAGAAACAAACCGGACCCCTTTGACCTTAAAGAGAGGAGAAATNGAATAGTCTGGGCTCAACCTAGAAATAGACAGGACCAATGGCCCTATTTCTATAGAGAGTAC    | : | 5713 |   |      |   |      |   |      |   |      |   |    |
| Xenopus_laevis             | : | TGATTATCTCAACACTAGCAGAAACAAACCGGACCCCTTTGACCTTAAAGAGAGGAGAAATNGAATAGTCTGGGCTCAACCTAGAAATAGACAGGACCAATGGCCCTATTTCTATAGAGAGTAC    | : | 5701 |   |      |   |      |   |      |   |      |   |    |



|                            |    |          |        |         |          |          |        |       |        |        |        |       |      |       |        |     |        |     |      |      |
|----------------------------|----|----------|--------|---------|----------|----------|--------|-------|--------|--------|--------|-------|------|-------|--------|-----|--------|-----|------|------|
|                            | 20 | *        | 6140   | *       | 6160     | *        | 6180   | *     | 6200   | *      | 6220   | *     | 6240 | *     |        |     |        |     |      |      |
| Bos_taurus                 | :  | GAAGATTA | CAATAA | AAATTA  | CGAATTTA | CCAGGAAC | CCCNCA | AGCAG | CAAGAA | CTTACA | AAATTA | TACCA | TAAA | CCCTG | GCACAA | TAA | CCCTTA | G   | 5831 |      |
| Hylobates_lar              | :  | TAAACAT  | CAATTA | GATAAA  | GGCCCA   | AC       | CCAT   | AACTT | CGGG   | TACC   | CAAC   | CCAA  | CCG  | CCG   | CCG    | CCG | CCG    | CCG | CCG  | 5840 |
| Lemur_catta                | :  | CGAACAT  | CAATTA | TAATAAA | GGCCCA   | AC       | CCAT   | AACTT | CGGG   | TACC   | CAAC   | CCAA  | CCG  | CCG   | CCG    | CCG | CCG    | CCG | CCG  | 5837 |
| Nycticebus_coucang         | :  | CGAACAT  | CAATTA | TAATAAA | GGCCCA   | AC       | CCAT   | AACTT | CGGG   | TACC   | CAAC   | CCAA  | CCG  | CCG   | CCG    | CCG | CCG    | CCG | CCG  | 5834 |
| Tarsius_bancanus           | :  | CGAACAT  | CAATTA | TAATAAA | GGCCCA   | AC       | CCAT   | AACTT | CGGG   | TACC   | CAAC   | CCAA  | CCG  | CCG   | CCG    | CCG | CCG    | CCG | CCG  | 5834 |
| Gorilla_gorilla            | :  | GAAGATTA | CAATAA | AAATTA  | CGAATTTA | CCAGGAAC | CCCNCA | AGCAG | CAAGAA | CTTACA | AAATTA | TACCA | TAAA | CCCTG | GCACAA | TAA | CCCTTA | G   | 5840 |      |
| Homo_sapiens               | :  | GAAGATTA | CAATAA | AAATTA  | CGAATTTA | CCAGGAAC | CCCNCA | AGCAG | CAAGAA | CTTACA | AAATTA | TACCA | TAAA | CCCTG | GCACAA | TAA | CCCTTA | G   | 5831 |      |
| Papio_hamadryas            | :  | GAAGATTA | CAATAA | AAATTA  | CGAATTTA | CCAGGAAC | CCCNCA | AGCAG | CAAGAA | CTTACA | AAATTA | TACCA | TAAA | CCCTG | GCACAA | TAA | CCCTTA | G   | 5840 |      |
| Cebus_albifrons            | :  | GAAGATTA | CAATAA | AAATTA  | CGAATTTA | CCAGGAAC | CCCNCA | AGCAG | CAAGAA | CTTACA | AAATTA | TACCA | TAAA | CCCTG | GCACAA | TAA | CCCTTA | G   | 5840 |      |
| Macaca_sylvanus            | :  | GAAGATTA | CAATAA | AAATTA  | CGAATTTA | CCAGGAAC | CCCNCA | AGCAG | CAAGAA | CTTACA | AAATTA | TACCA | TAAA | CCCTG | GCACAA | TAA | CCCTTA | G   | 5837 |      |
| Pongo_pygmaeus             | :  | GAAGATTA | CAATAA | AAATTA  | CGAATTTA | CCAGGAAC | CCCNCA | AGCAG | CAAGAA | CTTACA | AAATTA | TACCA | TAAA | CCCTG | GCACAA | TAA | CCCTTA | G   | 5840 |      |
| Pan_paniscus               | :  | GAAGATTA | CAATAA | AAATTA  | CGAATTTA | CCAGGAAC | CCCNCA | AGCAG | CAAGAA | CTTACA | AAATTA | TACCA | TAAA | CCCTG | GCACAA | TAA | CCCTTA | G   | 5840 |      |
| Agkistrodon_piscivorus     | :  | CGAACAT  | CAATTA | TAATAAA | GGCCCA   | AC       | CCAT   | AACTT | CGGG   | TACC   | CAAC   | CCAA  | CCG  | CCG   | CCG    | CCG | CCG    | CCG | CCG  | 5843 |
| Pantherophis_guttatus      | :  | CGAACAT  | CAATTA | TAATAAA | GGCCCA   | AC       | CCAT   | AACTT | CGGG   | TACC   | CAAC   | CCAA  | CCG  | CCG   | CCG    | CCG | CCG    | CCG | CCG  | 5843 |
| Dinodon_semicarinatus      | :  | CGAACAT  | CAATTA | TAATAAA | GGCCCA   | AC       | CCAT   | AACTT | CGGG   | TACC   | CAAC   | CCAA  | CCG  | CCG   | CCG    | CCG | CCG    | CCG | CCG  | 5843 |
| Boa_constrictor            | :  | CGAACAT  | CAATTA | TAATAAA | GGCCCA   | AC       | CCAT   | AACTT | CGGG   | TACC   | CAAC   | CCAA  | CCG  | CCG   | CCG    | CCG | CCG    | CCG | CCG  | 5852 |
| Python_regius              | :  | CGAACAT  | CAATTA | TAATAAA | GGCCCA   | AC       | CCAT   | AACTT | CGGG   | TACC   | CAAC   | CCAA  | CCG  | CCG   | CCG    | CCG | CCG    | CCG | CCG  | 5849 |
| Acrochordus_granulatus     | :  | CGAACAT  | CAATTA | TAATAAA | GGCCCA   | AC       | CCAT   | AACTT | CGGG   | TACC   | CAAC   | CCAA  | CCG  | CCG   | CCG    | CCG | CCG    | CCG | CCG  | 5846 |
| Cylindrophis_ruffus        | :  | CGAACAT  | CAATTA | TAATAAA | GGCCCA   | AC       | CCAT   | AACTT | CGGG   | TACC   | CAAC   | CCAA  | CCG  | CCG   | CCG    | CCG | CCG    | CCG | CCG  | 5816 |
| Ovophis_okinavensis        | :  | CGAACAT  | CAATTA | TAATAAA | GGCCCA   | AC       | CCAT   | AACTT | CGGG   | TACC   | CAAC   | CCAA  | CCG  | CCG   | CCG    | CCG | CCG    | CCG | CCG  | 5843 |
| Xenopeltis_unicolor        | :  | CGAACAT  | CAATTA | TAATAAA | GGCCCA   | AC       | CCAT   | AACTT | CGGG   | TACC   | CAAC   | CCAA  | CCG  | CCG   | CCG    | CCG | CCG    | CCG | CCG  | 5855 |
| Typlops_reticulatus        | :  | CGAACAT  | CAATTA | TAATAAA | GGCCCA   | AC       | CCAT   | AACTT | CGGG   | TACC   | CAAC   | CCAA  | CCG  | CCG   | CCG    | CCG | CCG    | CCG | CCG  | 5780 |
| Leptotyphlops_dulcis       | :  | GTAGCAT  | CAATAA | AAATTA  | CGAATTTA | CCAGGAAC | CCCNCA | AGCAG | CAAGAA | CTTACA | AAATTA | TACCA | TAAA | CCCTG | GCACAA | TAA | CCCTTA | G   | 5799 |      |
| Caiman_crocodilus          | :  | CGAACAT  | CAATTA | TAATAAA | GGCCCA   | AC       | CCAT   | AACTT | CGGG   | TACC   | CAAC   | CCAA  | CCG  | CCG   | CCG    | CCG | CCG    | CCG | CCG  | 5861 |
| Alligator_sinensis         | :  | CGAACAT  | CAATTA | TAATAAA | GGCCCA   | AC       | CCAT   | AACTT | CGGG   | TACC   | CAAC   | CCAA  | CCG  | CCG   | CCG    | CCG | CCG    | CCG | CCG  | 5891 |
| Alligator_mississippiensis | :  | CGAACAT  | CAATTA | TAATAAA | GGCCCA   | AC       | CCAT   | AACTT | CGGG   | TACC   | CAAC   | CCAA  | CCG  | CCG   | CCG    | CCG | CCG    | CCG | CCG  | 5840 |
| Gavialis_gangeticus        | :  | CGAACAT  | CAATTA | TAATAAA | GGCCCA   | AC       | CCAT   | AACTT | CGGG   | TACC   | CAAC   | CCAA  | CCG  | CCG   | CCG    | CCG | CCG    | CCG | CCG  | 5909 |
| Crocodylus_moreletii       | :  | CGAACAT  | CAATTA | TAATAAA | GGCCCA   | AC       | CCAT   | AACTT | CGGG   | TACC   | CAAC   | CCAA  | CCG  | CCG   | CCG    | CCG | CCG    | CCG | CCG  | 5885 |
| Dogania_subplana           | :  | CGAACAT  | CAATTA | TAATAAA | GGCCCA   | AC       | CCAT   | AACTT | CGGG   | TACC   | CAAC   | CCAA  | CCG  | CCG   | CCG    | CCG | CCG    | CCG | CCG  | 5807 |
| Pelomedusa_subrufa         | :  | CGAACAT  | CAATTA | TAATAAA | GGCCCA   | AC       | CCAT   | AACTT | CGGG   | TACC   | CAAC   | CCAA  | CCG  | CCG   | CCG    | CCG | CCG    | CCG | CCG  | 5828 |
| Chrysemys_picta            | :  | CGAACAT  | CAATTA | TAATAAA | GGCCCA   | AC       | CCAT   | AACTT | CGGG   | TACC   | CAAC   | CCAA  | CCG  | CCG   | CCG    | CCG | CCG    | CCG | CCG  | 5846 |
| Chelonia_mydas             | :  | CGAACAT  | CAATTA | TAATAAA | GGCCCA   | AC       | CCAT   | AACTT | CGGG   | TACC   | CAAC   | CCAA  | CCG  | CCG   | CCG    | CCG | CCG    | CCG | CCG  | 5849 |
| Tinanus_major              | :  | CGAACAT  | CAATTA | TAATAAA | GGCCCA   | AC       | CCAT   | AACTT | CGGG   | TACC   | CAAC   | CCAA  | CCG  | CCG   | CCG    | CCG | CCG    | CCG | CCG  | 5825 |
| Smithornis_sharpei         | :  | CGAACAT  | CAATTA | TAATAAA | GGCCCA   | AC       | CCAT   | AACTT | CGGG   | TACC   | CAAC   | CCAA  | CCG  | CCG   | CCG    | CCG | CCG    | CCG | CCG  | 5831 |
| Corvus_frugilegus          | :  | CGAACAT  | CAATTA | TAATAAA | GGCCCA   | AC       | CCAT   | AACTT | CGGG   | TACC   | CAAC   | CCAA  | CCG  | CCG   | CCG    | CCG | CCG    | CCG | CCG  | 5834 |
| Vidua_chalybeata           | :  | CGAACAT  | CAATTA | TAATAAA | GGCCCA   | AC       | CCAT   | AACTT | CGGG   | TACC   | CAAC   | CCAA  | CCG  | CCG   | CCG    | CCG | CCG    | CCG | CCG  | 5834 |
| Buteo_buteo                | :  | CGAACAT  | CAATTA | TAATAAA | GGCCCA   | AC       | CCAT   | AACTT | CGGG   | TACC   | CAAC   | CCAA  | CCG  | CCG   | CCG    | CCG | CCG    | CCG | CCG  | 5834 |
| Falco_peregrinus           | :  | CGAACAT  | CAATTA | TAATAAA | GGCCCA   | AC       | CCAT   | AACTT | CGGG   | TACC   | CAAC   | CCAA  | CCG  | CCG   | CCG    | CCG | CCG    | CCG | CCG  | 5834 |
| Dromaius_novaeollandiae    | :  | CGAACAT  | CAATTA | TAATAAA | GGCCCA   | AC       | CCAT   | AACTT | CGGG   | TACC   | CAAC   | CCAA  | CCG  | CCG   | CCG    | CCG | CCG    | CCG | CCG  | 5831 |
| Struthio_camelus           | :  | CGAACAT  | CAATTA | TAATAAA | GGCCCA   | AC       | CCAT   | AACTT | CGGG   | TACC   | CAAC   | CCAA  | CCG  | CCG   | CCG    | CCG | CCG    | CCG | CCG  | 5834 |
| Apteryx_haastii            | :  | CGAACAT  | CAATTA | TAATAAA | GGCCCA   | AC       | CCAT   | AACTT | CGGG   | TACC   | CAAC   | CCAA  | CCG  | CCG   | CCG    | CCG | CCG    | CCG | CCG  | 5831 |
| Rhea_american              | :  | CGAACAT  | CAATTA | TAATAAA | GGCCCA   | AC       | CCAT   | AACTT | CGGG   | TACC   | CAAC   | CCAA  | CCG  | CCG   | CCG    | CCG | CCG    | CCG | CCG  | 5834 |
| Gallus_gallus              | :  | CGAACAT  | CAATTA | TAATAAA | GGCCCA   | AC       | CCAT   | AACTT | CGGG   | TACC   | CAAC   | CCAA  | CCG  | CCG   | CCG    | CCG | CCG    | CCG | CCG  | 5831 |
| Ciconia_ciconia            | :  | CGAACAT  | CAATTA | TAATAAA | GGCCCA   | AC       | CCAT   | AACTT | CGGG   | TACC   | CAAC   | CCAA  | CCG  | CCG   | CCG    | CCG | CCG    | CCG | CCG  | 5834 |
| Ciconia_boyciana           | :  | CGAACAT  | CAATTA | TAATAAA | GGCCCA   | AC       | CCAT   | AACTT | CGGG   | TACC   | CAAC   | CCAA  | CCG  | CCG   | CCG    | CCG | CCG    | CCG | CCG  | 5834 |
| Iguana_iguana              | :  | CGAACAT  | CAATTA | TAATAAA | GGCCCA   | AC       | CCAT   | AACTT | CGGG   | TACC   | CAAC   | CCAA  | CCG  | CCG   | CCG    | CCG | CCG    | CCG | CCG  | 5822 |
| Eumeces_egregius           | :  | CGAACAT  | CAATTA | TAATAAA | GGCCCA   | AC       | CCAT   | AACTT | CGGG   | TACC   | CAAC   | CCAA  | CCG  | CCG   | CCG    | CCG | CCG    | CCG | CCG  | 5828 |
| Sphenodon_punctatus        | :  | CGAACAT  | CAATTA | TAATAAA | GGCCCA   | AC       | CCAT   | AACTT | CGGG   | TACC   | CAAC   | CCAA  | CCG  | CCG   | CCG    | CCG | CCG    | CCG | CCG  | 5825 |
| Sceloporus_occidentalis    | :  | CGAACAT  | CAATTA | TAATAAA | GGCCCA   | AC       | CCAT   | AACTT | CGGG   | TACC   | CAAC   | CCAA  | CCG  | CCG   | CCG    | CCG | CCG    | CCG | CCG  | 5825 |
| Cordylus_warreni           | :  | CGAACAT  | CAATTA | TAATAAA | GGCCCA   | AC       | CCAT   | AACTT | CGGG   | TACC   | CAAC   | CCAA  | CCG  | CCG   | CCG    | CCG | CCG    | CCG | CCG  | 5834 |
| Abronia_graminea           | :  | CGAACAT  | CAATTA | TAATAAA | GGCCCA   | AC       | CCAT   | AACTT | CGGG   | TACC   | CAAC   | CCAA  | CCG  | CCG   | CCG    | CCG | CCG    | CCG | CCG  | 5822 |
| Shinisaurus_crocodilurus   | :  | CGAACAT  | CAATTA | TAATAAA | GGCCCA   | AC       | CCAT   | AACTT | CGGG   | TACC   | CAAC   | CCAA  | CCG  | CCG   | CCG    | CCG | CCG    | CCG | CCG  | 5816 |
| Varanus_komodoensis        | :  | CGAACAT  | CAATTA | TAATAAA | GGCCCA   | AC       | CCAT   | AACTT | CGGG   | TACC   | CAAC   | CCAA  | CCG  | CCG   | CCG    | CCG | CCG    | CCG | CCG  | 5867 |
| Rhineura_floridana         | :  | CGAACAT  | CAATTA | TAATAAA | GGCCCA   | AC       | CCAT   | AACTT | CGGG   | TACC   | CAAC   | CCAA  | CCG  | CCG   | CCG    | CCG | CCG    | CCG | CCG  | 5810 |
| Geocalamus_acutus          | :  | CGAACAT  | CAATTA | TAATAAA | GGCCCA   | AC       | CCAT   | AACTT | CGGG   | TACC   | CAAC   | CCAA  | CCG  | CCG   | CCG    | CCG | CCG    | CCG | CCG  | 5798 |
| Diplometopon_zarudnyi      | :  | CGAACAT  | CAATTA | TAATAAA | GGCCCA   | AC       | CCAT   | AACTT | CGGG   | TACC   | CAAC   | CCAA  | CCG  | CCG   | CCG    | CCG | CCG    | CCG | CCG  | 5807 |
| Amphisbaena_schmidti       | :  | CGAACAT  | CAATTA | TAATAAA | GGCCCA   | AC       | CCAT   | AACTT | CGGG   | TACC   | CAAC   | CCAA  | CCG  | CCG   | CCG    | CCG | CCG    | CCG | CCG  | 5807 |
| Bipes_tridactylus          | :  | CGAACAT  | CAATTA | TAATAAA | GGCCCA   | AC       | CCAT   | AACTT | CGGG   | TACC   | CAAC   | CCAA  | CCG  | CCG   | CCG    | CCG | CCG    | CCG | CCG  | 5795 |
| Bipes_canaliculatus        | :  | CGAACAT  | CAATTA | TAATAAA | GGCCCA   | AC       | CCAT   | AACTT | CGGG   | TACC   | CAAC   | CCAA  | CCG  | CCG   | CCG    | CCG | CCG    | CCG | CCG  | 5807 |
| Bipes_biporus              | :  | CGAACAT  | CAATTA | TAATAAA | GGCCCA   | AC       | CCAT   | AACTT | CGGG   | TACC   | CAAC   | CCAA  | CCG  | CCG   | CCG    | CCG | CCG    | CCG | CCG  | 5849 |
| Anolis_carolinensis        | :  | CGAACAT  | CAATTA | TAATAAA | GGCCCA   | AC       | CCAT   | AACTT | CGGG   | TACC   | CAAC   | CCAA  | CCG  | CCG   | CCG    | CCG | CCG    | CCG | CCG  | 5495 |
| Ophisaurus_atnuatus        | :  | CGAACAT  | CAATTA | TAATAAA | GGCCCA   | AC       | CCAT   | AACTT | CGGG   | TACC   | CAAC   | CCAA  | CCG  | CCG   | CCG    | CCG | CCG    | CCG | CCG  | 5454 |
| Varanus_salvator           | :  | CGAACAT  | CAATTA | TAATAAA | GGCCCA   | AC       | CCAT   | AACTT | CGGG   | TACC   | CAAC   | CCAA  | CCG  | CCG   | CCG    | CCG | CCG    | CCG | CCG  | 5859 |
| Mertensiella_luschani      | :  | CGAACAT  | CAATTA | TAATAAA | GGCCCA   | AC       | CCAT   | AACTT | CGGG   | TACC   | CAAC   | CCAA  | CCG  | CCG   | CCG    | CCG | CCG    | CCG | CCG  | 5843 |
| Xenopus_laevis             | :  | CGAACAT  | CAATTA | TAATAAA | GGCCCA   | AC       | CCAT   | AACTT | CGGG   | TACC   | CAAC   | CCAA  | CCG  | CCG   | CCG    | CCG | CCG    | CCG | CCG  | 5831 |

Table with 3 columns: Species Name, Multiple Sequence Alignment (with position markers 6260, 6280, 6300, 6320, 6340, 6360, 6380), and Line Number (5958-5988). The alignment shows conserved regions across various species.

|                            | * | 6400       | *     | 6420         | *     | 6440          | *     | 6460         | *     | 6480         | *     | 6500         | *     | 6             |        |
|----------------------------|---|------------|-------|--------------|-------|---------------|-------|--------------|-------|--------------|-------|--------------|-------|---------------|--------|
| Bos_taurus                 | : | CCACCAACCA | ----- | AAACCCAAATAC | ----- | AAACCAACATATA | ----- | AGGAAACATATA | ----- | GCACCAACAG   | ----- | GCACCAACAG   | ----- | GGGCTAGNAATAA | : 6076 |
| Hylobates_lar              | : | CCCCACGACC | ----- | ATTAACCCCAAG | ----- | CAACCAACCAAC  | ----- | CCACCAACCAAC | ----- | CCACCAACCAAC | ----- | CCACCAACCAAC | ----- | GGGCTAGNAATAA | : 6085 |
| Lemur_catta                | : | CCCCACGACC | ----- | AAAAACCAACCA | ----- | CAACCAACCAAC  | ----- | CCACCAACCAAC | ----- | CCACCAACCAAC | ----- | CCACCAACCAAC | ----- | GGGCTAGNAATAA | : 6082 |
| Nycticebus_coucang         | : | CCCCACGACC | ----- | AAAAACCAACCA | ----- | CAACCAACCAAC  | ----- | CCACCAACCAAC | ----- | CCACCAACCAAC | ----- | CCACCAACCAAC | ----- | GGGCTAGNAATAA | : 6079 |
| Tarsius_bancanus           | : | CCCCACGACC | ----- | AAAAACCAACCA | ----- | CAACCAACCAAC  | ----- | CCACCAACCAAC | ----- | CCACCAACCAAC | ----- | CCACCAACCAAC | ----- | GGGCTAGNAATAA | : 6079 |
| Gorilla_gorilla            | : | CCCCACGACC | ----- | AAAAACCAACCA | ----- | CAACCAACCAAC  | ----- | CCACCAACCAAC | ----- | CCACCAACCAAC | ----- | CCACCAACCAAC | ----- | GGGCTAGNAATAA | : 6085 |
| Homo_sapiens               | : | CCCCACGACC | ----- | AAAAACCAACCA | ----- | CAACCAACCAAC  | ----- | CCACCAACCAAC | ----- | CCACCAACCAAC | ----- | CCACCAACCAAC | ----- | GGGCTAGNAATAA | : 6076 |
| Papio_hamadryas            | : | CCCCACGACC | ----- | AAAAACCAACCA | ----- | CAACCAACCAAC  | ----- | CCACCAACCAAC | ----- | CCACCAACCAAC | ----- | CCACCAACCAAC | ----- | GGGCTAGNAATAA | : 6085 |
| Cebus_albifrons            | : | CCCCACGACC | ----- | AAAAACCAACCA | ----- | CAACCAACCAAC  | ----- | CCACCAACCAAC | ----- | CCACCAACCAAC | ----- | CCACCAACCAAC | ----- | GGGCTAGNAATAA | : 6085 |
| Macaca_sylvanus            | : | CCCCACGACC | ----- | AAAAACCAACCA | ----- | CAACCAACCAAC  | ----- | CCACCAACCAAC | ----- | CCACCAACCAAC | ----- | CCACCAACCAAC | ----- | GGGCTAGNAATAA | : 6082 |
| Pongo_pygmaeus             | : | CCCCACGACC | ----- | AAAAACCAACCA | ----- | CAACCAACCAAC  | ----- | CCACCAACCAAC | ----- | CCACCAACCAAC | ----- | CCACCAACCAAC | ----- | GGGCTAGNAATAA | : 6085 |
| Pan_paniscus               | : | CCCCACGACC | ----- | AAAAACCAACCA | ----- | CAACCAACCAAC  | ----- | CCACCAACCAAC | ----- | CCACCAACCAAC | ----- | CCACCAACCAAC | ----- | GGGCTAGNAATAA | : 6085 |
| Agkistrodon_piscivorus     | : | CCCCACGACC | ----- | AAAAACCAACCA | ----- | CAACCAACCAAC  | ----- | CCACCAACCAAC | ----- | CCACCAACCAAC | ----- | CCACCAACCAAC | ----- | GGGCTAGNAATAA | : 6085 |
| Pantherophis_guttatus      | : | CCCCACGACC | ----- | AAAAACCAACCA | ----- | CAACCAACCAAC  | ----- | CCACCAACCAAC | ----- | CCACCAACCAAC | ----- | CCACCAACCAAC | ----- | GGGCTAGNAATAA | : 6085 |
| Dinodon_semicarinatus      | : | CCCCACGACC | ----- | AAAAACCAACCA | ----- | CAACCAACCAAC  | ----- | CCACCAACCAAC | ----- | CCACCAACCAAC | ----- | CCACCAACCAAC | ----- | GGGCTAGNAATAA | : 6085 |
| Boa_constrictor            | : | CCCCACGACC | ----- | AAAAACCAACCA | ----- | CAACCAACCAAC  | ----- | CCACCAACCAAC | ----- | CCACCAACCAAC | ----- | CCACCAACCAAC | ----- | GGGCTAGNAATAA | : 6094 |
| Python_regius              | : | CCCCACGACC | ----- | AAAAACCAACCA | ----- | CAACCAACCAAC  | ----- | CCACCAACCAAC | ----- | CCACCAACCAAC | ----- | CCACCAACCAAC | ----- | GGGCTAGNAATAA | : 6091 |
| Acrochordus_granulatus     | : | CCCCACGACC | ----- | AAAAACCAACCA | ----- | CAACCAACCAAC  | ----- | CCACCAACCAAC | ----- | CCACCAACCAAC | ----- | CCACCAACCAAC | ----- | GGGCTAGNAATAA | : 6088 |
| Cylindrophis_ruffus        | : | CCCCACGACC | ----- | AAAAACCAACCA | ----- | CAACCAACCAAC  | ----- | CCACCAACCAAC | ----- | CCACCAACCAAC | ----- | CCACCAACCAAC | ----- | GGGCTAGNAATAA | : 6058 |
| Ovophis_okinavensis        | : | CCCCACGACC | ----- | AAAAACCAACCA | ----- | CAACCAACCAAC  | ----- | CCACCAACCAAC | ----- | CCACCAACCAAC | ----- | CCACCAACCAAC | ----- | GGGCTAGNAATAA | : 6085 |
| Xenopeltis_unicolor        | : | CCCCACGACC | ----- | AAAAACCAACCA | ----- | CAACCAACCAAC  | ----- | CCACCAACCAAC | ----- | CCACCAACCAAC | ----- | CCACCAACCAAC | ----- | GGGCTAGNAATAA | : 6097 |
| Typhlops_reticulatus       | : | CCCCACGACC | ----- | AAAAACCAACCA | ----- | CAACCAACCAAC  | ----- | CCACCAACCAAC | ----- | CCACCAACCAAC | ----- | CCACCAACCAAC | ----- | GGGCTAGNAATAA | : 6022 |
| Leptotyphlops_dulcis       | : | CCCCACGACC | ----- | AAAAACCAACCA | ----- | CAACCAACCAAC  | ----- | CCACCAACCAAC | ----- | CCACCAACCAAC | ----- | CCACCAACCAAC | ----- | GGGCTAGNAATAA | : 6044 |
| Caiman_crocodilus          | : | CCCCACGACC | ----- | AAAAACCAACCA | ----- | CAACCAACCAAC  | ----- | CCACCAACCAAC | ----- | CCACCAACCAAC | ----- | CCACCAACCAAC | ----- | GGGCTAGNAATAA | : 6103 |
| Alligator_sinensis         | : | CCCCACGACC | ----- | AAAAACCAACCA | ----- | CAACCAACCAAC  | ----- | CCACCAACCAAC | ----- | CCACCAACCAAC | ----- | CCACCAACCAAC | ----- | GGGCTAGNAATAA | : 6133 |
| Alligator_mississippiensis | : | CCCCACGACC | ----- | AAAAACCAACCA | ----- | CAACCAACCAAC  | ----- | CCACCAACCAAC | ----- | CCACCAACCAAC | ----- | CCACCAACCAAC | ----- | GGGCTAGNAATAA | : 6082 |
| Gavialis_gangeticus        | : | CCCCACGACC | ----- | AAAAACCAACCA | ----- | CAACCAACCAAC  | ----- | CCACCAACCAAC | ----- | CCACCAACCAAC | ----- | CCACCAACCAAC | ----- | GGGCTAGNAATAA | : 6148 |
| Crocodylus_moreletii       | : | CCCCACGACC | ----- | AAAAACCAACCA | ----- | CAACCAACCAAC  | ----- | CCACCAACCAAC | ----- | CCACCAACCAAC | ----- | CCACCAACCAAC | ----- | GGGCTAGNAATAA | : 6124 |
| Dogania_subplana           | : | CCCCACGACC | ----- | AAAAACCAACCA | ----- | CAACCAACCAAC  | ----- | CCACCAACCAAC | ----- | CCACCAACCAAC | ----- | CCACCAACCAAC | ----- | GGGCTAGNAATAA | : 6052 |
| Pelomedusa_subrufa         | : | CCCCACGACC | ----- | AAAAACCAACCA | ----- | CAACCAACCAAC  | ----- | CCACCAACCAAC | ----- | CCACCAACCAAC | ----- | CCACCAACCAAC | ----- | GGGCTAGNAATAA | : 6073 |
| Chrysemys_picta            | : | CCCCACGACC | ----- | AAAAACCAACCA | ----- | CAACCAACCAAC  | ----- | CCACCAACCAAC | ----- | CCACCAACCAAC | ----- | CCACCAACCAAC | ----- | GGGCTAGNAATAA | : 6091 |
| Chelonia_mydas             | : | CCCCACGACC | ----- | AAAAACCAACCA | ----- | CAACCAACCAAC  | ----- | CCACCAACCAAC | ----- | CCACCAACCAAC | ----- | CCACCAACCAAC | ----- | GGGCTAGNAATAA | : 6094 |
| Tinamus_major              | : | CCCCACGACC | ----- | AAAAACCAACCA | ----- | CAACCAACCAAC  | ----- | CCACCAACCAAC | ----- | CCACCAACCAAC | ----- | CCACCAACCAAC | ----- | GGGCTAGNAATAA | : 6070 |
| Smithornis_sharpei         | : | CCCCACGACC | ----- | AAAAACCAACCA | ----- | CAACCAACCAAC  | ----- | CCACCAACCAAC | ----- | CCACCAACCAAC | ----- | CCACCAACCAAC | ----- | GGGCTAGNAATAA | : 6079 |
| Corvus_chalybeatus         | : | CCCCACGACC | ----- | AAAAACCAACCA | ----- | CAACCAACCAAC  | ----- | CCACCAACCAAC | ----- | CCACCAACCAAC | ----- | CCACCAACCAAC | ----- | GGGCTAGNAATAA | : 6079 |
| Vidua_chalybeata           | : | CCCCACGACC | ----- | AAAAACCAACCA | ----- | CAACCAACCAAC  | ----- | CCACCAACCAAC | ----- | CCACCAACCAAC | ----- | CCACCAACCAAC | ----- | GGGCTAGNAATAA | : 6079 |
| Buteo_buteo                | : | CCCCACGACC | ----- | AAAAACCAACCA | ----- | CAACCAACCAAC  | ----- | CCACCAACCAAC | ----- | CCACCAACCAAC | ----- | CCACCAACCAAC | ----- | GGGCTAGNAATAA | : 6079 |
| Falco_peregrinus           | : | CCCCACGACC | ----- | AAAAACCAACCA | ----- | CAACCAACCAAC  | ----- | CCACCAACCAAC | ----- | CCACCAACCAAC | ----- | CCACCAACCAAC | ----- | GGGCTAGNAATAA | : 6076 |
| Dromaius_novaeollandiae    | : | CCCCACGACC | ----- | AAAAACCAACCA | ----- | CAACCAACCAAC  | ----- | CCACCAACCAAC | ----- | CCACCAACCAAC | ----- | CCACCAACCAAC | ----- | GGGCTAGNAATAA | : 6073 |
| Struthio_camelus           | : | CCCCACGACC | ----- | AAAAACCAACCA | ----- | CAACCAACCAAC  | ----- | CCACCAACCAAC | ----- | CCACCAACCAAC | ----- | CCACCAACCAAC | ----- | GGGCTAGNAATAA | : 6079 |
| Apteryx_haastii            | : | CCCCACGACC | ----- | AAAAACCAACCA | ----- | CAACCAACCAAC  | ----- | CCACCAACCAAC | ----- | CCACCAACCAAC | ----- | CCACCAACCAAC | ----- | GGGCTAGNAATAA | : 6076 |
| Rhea_americanus            | : | CCCCACGACC | ----- | AAAAACCAACCA | ----- | CAACCAACCAAC  | ----- | CCACCAACCAAC | ----- | CCACCAACCAAC | ----- | CCACCAACCAAC | ----- | GGGCTAGNAATAA | : 6079 |
| Gallus_gallus              | : | CCCCACGACC | ----- | AAAAACCAACCA | ----- | CAACCAACCAAC  | ----- | CCACCAACCAAC | ----- | CCACCAACCAAC | ----- | CCACCAACCAAC | ----- | GGGCTAGNAATAA | : 6073 |
| Ciconia_ciconia            | : | CCCCACGACC | ----- | AAAAACCAACCA | ----- | CAACCAACCAAC  | ----- | CCACCAACCAAC | ----- | CCACCAACCAAC | ----- | CCACCAACCAAC | ----- | GGGCTAGNAATAA | : 6079 |
| Ciconia_boyciniana         | : | CCCCACGACC | ----- | AAAAACCAACCA | ----- | CAACCAACCAAC  | ----- | CCACCAACCAAC | ----- | CCACCAACCAAC | ----- | CCACCAACCAAC | ----- | GGGCTAGNAATAA | : 6079 |
| Iguana_iguana              | : | CCCCACGACC | ----- | AAAAACCAACCA | ----- | CAACCAACCAAC  | ----- | CCACCAACCAAC | ----- | CCACCAACCAAC | ----- | CCACCAACCAAC | ----- | GGGCTAGNAATAA | : 6067 |
| Eumeces_egregius           | : | CCCCACGACC | ----- | AAAAACCAACCA | ----- | CAACCAACCAAC  | ----- | CCACCAACCAAC | ----- | CCACCAACCAAC | ----- | CCACCAACCAAC | ----- | GGGCTAGNAATAA | : 6070 |
| Sphenodon_punctatus        | : | CCCCACGACC | ----- | AAAAACCAACCA | ----- | CAACCAACCAAC  | ----- | CCACCAACCAAC | ----- | CCACCAACCAAC | ----- | CCACCAACCAAC | ----- | GGGCTAGNAATAA | : 6070 |
| Sceloporus_occidentalis    | : | CCCCACGACC | ----- | AAAAACCAACCA | ----- | CAACCAACCAAC  | ----- | CCACCAACCAAC | ----- | CCACCAACCAAC | ----- | CCACCAACCAAC | ----- | GGGCTAGNAATAA | : 6070 |
| Cordylus_warreni           | : | CCCCACGACC | ----- | AAAAACCAACCA | ----- | CAACCAACCAAC  | ----- | CCACCAACCAAC | ----- | CCACCAACCAAC | ----- | CCACCAACCAAC | ----- | GGGCTAGNAATAA | : 6079 |
| Abronia_graminea           | : | CCCCACGACC | ----- | AAAAACCAACCA | ----- | CAACCAACCAAC  | ----- | CCACCAACCAAC | ----- | CCACCAACCAAC | ----- | CCACCAACCAAC | ----- | GGGCTAGNAATAA | : 6070 |
| Shinisaurus_crocodilurus   | : | CCCCACGACC | ----- | AAAAACCAACCA | ----- | CAACCAACCAAC  | ----- | CCACCAACCAAC | ----- | CCACCAACCAAC | ----- | CCACCAACCAAC | ----- | GGGCTAGNAATAA | : 6058 |
| Varanus_komodoensis        | : | CCCCACGACC | ----- | AAAAACCAACCA | ----- | CAACCAACCAAC  | ----- | CCACCAACCAAC | ----- | CCACCAACCAAC | ----- | CCACCAACCAAC | ----- | GGGCTAGNAATAA | : 6112 |
| Rhineura_floridana         | : | CCCCACGACC | ----- | AAAAACCAACCA | ----- | CAACCAACCAAC  | ----- | CCACCAACCAAC | ----- | CCACCAACCAAC | ----- | CCACCAACCAAC | ----- | GGGCTAGNAATAA | : 6052 |
| Geocalamus_acutus          | : | CCCCACGACC | ----- | AAAAACCAACCA | ----- | CAACCAACCAAC  | ----- | CCACCAACCAAC | ----- | CCACCAACCAAC | ----- | CCACCAACCAAC | ----- | GGGCTAGNAATAA | : 6043 |
| Diplometopon_zarudnyi      | : | CCCCACGACC | ----- | AAAAACCAACCA | ----- | CAACCAACCAAC  | ----- | CCACCAACCAAC | ----- | CCACCAACCAAC | ----- | CCACCAACCAAC | ----- | GGGCTAGNAATAA | : 6052 |
| Amphisbaena_schmidti       | : | CCCCACGACC | ----- | AAAAACCAACCA | ----- | CAACCAACCAAC  | ----- | CCACCAACCAAC | ----- | CCACCAACCAAC | ----- | CCACCAACCAAC | ----- | GGGCTAGNAATAA | : 6052 |
| Bipes_tridactylus          | : | CCCCACGACC | ----- | AAAAACCAACCA | ----- | CAACCAACCAAC  | ----- | CCACCAACCAAC | ----- | CCACCAACCAAC | ----- | CCACCAACCAAC | ----- | GGGCTAGNAATAA | : 6040 |
| Bipes_canaliculatus        | : | CCCCACGACC | ----- | AAAAACCAACCA | ----- | CAACCAACCAAC  | ----- | CCACCAACCAAC | ----- | CCACCAACCAAC | ----- | CCACCAACCAAC | ----- | GGGCTAGNAATAA | : 6052 |
| Bipes_biporus              | : | CCCCACGACC | ----- | AAAAACCAACCA | ----- | CAACCAACCAAC  | ----- | CCACCAACCAAC | ----- | CCACCAACCAAC | ----- | CCACCAACCAAC | ----- | GGGCTAGNAATAA | : 6094 |
| Anolis_carolinensis        | : | CCCCACGACC | ----- | AAAAACCAACCA | ----- | CAACCAACCAAC  | ----- | CCACCAACCAAC | ----- | CCACCAACCAAC | ----- | CCACCAACCAAC | ----- | GGGCTAGNAATAA | : 5736 |
| Ophisaurus_atnuatus        | : | CCCCACGACC | ----- | AAAAACCAACCA | ----- | CAACCAACCAAC  | ----- | CCACCAACCAAC | ----- | CCACCAACCAAC | ----- | CCACCAACCAAC | ----- | GGGCTAGNAATAA | : 5696 |
| Varanus_salvator           | : | CCCCACGACC | ----- | AAAAACCAACCA | ----- | CAACCAACCAAC  | ----- | CCACCAACCAAC | ----- | CCACCAACCAAC | ----- | CCACCAACCAAC | ----- | GGGCTAGNAATAA | : 6104 |
| Mertensiella_luschani      | : | CCCCACGACC | ----- | AAAAACCAACCA | ----- | CAACCAACCAAC  | ----- | CCACCAACCAAC | ----- | CCACCAACCAAC | ----- | CCACCAACCAAC | ----- | GGGCTAGNAATAA | : 6088 |
| Xenopus_laevis             | : | CCCCACGACC | ----- | AAAAACCAACCA | ----- | CAACCAACCAAC  | ----- | CCACCAACCAAC | ----- | CCACCAACCAAC | ----- | CCACCAACCAAC | ----- | GGGCTAGNAATAA | : 6076 |



|                            | 6660                      | *                      | 6680                   | *                       | 6700                      | *      | 6720 | * | 6740 | * | 6760 | * | 6780 |  |
|----------------------------|---------------------------|------------------------|------------------------|-------------------------|---------------------------|--------|------|---|------|---|------|---|------|--|
| Bos_taurus                 | : AATCTCGGGCAAGGAACTAAAT  | : AAACATATTAACCCNAAGCC | : CAATATATTAAGCAATAGCC | : AGTATAAAAAAGGNAAGCCCA | : TTCTGGATCCCGAAGAAACAGGG | : 6333 |      |   |      |   |      |   |      |  |
| Hylobates_lar              | : AACTTCGGGGCGGAACTATAGC  | : AACATCCAAACAAATATTA  | : AACAAATAATAATAGCCCG  | : GGATAAAAAAGGNAAGCCCA  | : TTCTGGATCCCGAAGAAACAGGG | : 6342 |      |   |      |   |      |   |      |  |
| Lemur_catta                | : AAACCTCGGGCAAGGAACTAAAT | : AAATATATTAACCCNAAGCC | : CAATATATTAAGCAATAGCC | : AGTATAAAAAAGGNAAGCCCA | : TTCTGGATCCCGAAGAAACAGGG | : 6339 |      |   |      |   |      |   |      |  |
| Nycticebus_coucang         | : AAACCTCGGGCAAGGAACTAAAT | : AAACATATTAACCCNAAGCC | : CAATATATTAAGCAATAGCC | : AGTATAAAAAAGGNAAGCCCA | : TTCTGGATCCCGAAGAAACAGGG | : 6336 |      |   |      |   |      |   |      |  |
| Tarsius_bancanus           | : AATCTCGGGCAAGGAACTAAAT  | : AAACATATTAACCCNAAGCC | : CAATATATTAAGCAATAGCC | : AGTATAAAAAAGGNAAGCCCA | : TTCTGGATCCCGAAGAAACAGGG | : 6336 |      |   |      |   |      |   |      |  |
| Gorilla_gorilla            | : AATCTCGGGCAAGGAACTAAAT  | : AAACATATTAACCCNAAGCC | : CAATATATTAAGCAATAGCC | : AGTATAAAAAAGGNAAGCCCA | : TTCTGGATCCCGAAGAAACAGGG | : 6342 |      |   |      |   |      |   |      |  |
| Homo_sapiens               | : AATCTCGGGCAAGGAACTAAAT  | : AAACATATTAACCCNAAGCC | : CAATATATTAAGCAATAGCC | : AGTATAAAAAAGGNAAGCCCA | : TTCTGGATCCCGAAGAAACAGGG | : 6333 |      |   |      |   |      |   |      |  |
| Papio_hamadryas            | : AATCTCGGGCAAGGAACTAAAT  | : AAACATATTAACCCNAAGCC | : CAATATATTAAGCAATAGCC | : AGTATAAAAAAGGNAAGCCCA | : TTCTGGATCCCGAAGAAACAGGG | : 6345 |      |   |      |   |      |   |      |  |
| Cebus_albifrons            | : AATCTCGGGCAAGGAACTAAAT  | : AAACATATTAACCCNAAGCC | : CAATATATTAAGCAATAGCC | : AGTATAAAAAAGGNAAGCCCA | : TTCTGGATCCCGAAGAAACAGGG | : 6342 |      |   |      |   |      |   |      |  |
| Macaca_sylvanus            | : AATCTCGGGCAAGGAACTAAAT  | : AAACATATTAACCCNAAGCC | : CAATATATTAAGCAATAGCC | : AGTATAAAAAAGGNAAGCCCA | : TTCTGGATCCCGAAGAAACAGGG | : 6339 |      |   |      |   |      |   |      |  |
| Pongo_pygmaeus             | : AATCTCGGGCAAGGAACTAAAT  | : AAACATATTAACCCNAAGCC | : CAATATATTAAGCAATAGCC | : AGTATAAAAAAGGNAAGCCCA | : TTCTGGATCCCGAAGAAACAGGG | : 6342 |      |   |      |   |      |   |      |  |
| Pan_paniscus               | : AATCTCGGGCAAGGAACTAAAT  | : AAACATATTAACCCNAAGCC | : CAATATATTAAGCAATAGCC | : AGTATAAAAAAGGNAAGCCCA | : TTCTGGATCCCGAAGAAACAGGG | : 6342 |      |   |      |   |      |   |      |  |
| Agkistrodon_piscivorus     | : AAATACCTCAAACTGAGAAATTA | : CTCAAAACGAAACCAACAA  | : CAAATAAAAAATTAAGCC   | : GGGTAAAGCCCAAGGG      | : TTCTGGATCCCGAAGAAACAGGG | : 6342 |      |   |      |   |      |   |      |  |
| Pantherophis_guttatus      | : AAACCTCGGGCAAGGAACTAAAT | : AAACATATTAACCCNAAGCC | : CAATATATTAAGCAATAGCC | : AGTATAAAAAAGGNAAGCCCA | : TTCTGGATCCCGAAGAAACAGGG | : 6342 |      |   |      |   |      |   |      |  |
| Dinodon_semicarinatus      | : AAACCTCGGGCAAGGAACTAAAT | : AAACATATTAACCCNAAGCC | : CAATATATTAAGCAATAGCC | : AGTATAAAAAAGGNAAGCCCA | : TTCTGGATCCCGAAGAAACAGGG | : 6342 |      |   |      |   |      |   |      |  |
| Boa_constrictor            | : AAACCTCGGGCAAGGAACTAAAT | : AAACATATTAACCCNAAGCC | : CAATATATTAAGCAATAGCC | : AGTATAAAAAAGGNAAGCCCA | : TTCTGGATCCCGAAGAAACAGGG | : 6351 |      |   |      |   |      |   |      |  |
| Python_regius              | : AAACCTCGGGCAAGGAACTAAAT | : AAACATATTAACCCNAAGCC | : CAATATATTAAGCAATAGCC | : AGTATAAAAAAGGNAAGCCCA | : TTCTGGATCCCGAAGAAACAGGG | : 6348 |      |   |      |   |      |   |      |  |
| Acrochordus_granulatus     | : AAACCTCGGGCAAGGAACTAAAT | : AAACATATTAACCCNAAGCC | : CAATATATTAAGCAATAGCC | : AGTATAAAAAAGGNAAGCCCA | : TTCTGGATCCCGAAGAAACAGGG | : 6345 |      |   |      |   |      |   |      |  |
| Cylindrophis_ruffus        | : AAACCTCGGGCAAGGAACTAAAT | : AAACATATTAACCCNAAGCC | : CAATATATTAAGCAATAGCC | : AGTATAAAAAAGGNAAGCCCA | : TTCTGGATCCCGAAGAAACAGGG | : 6315 |      |   |      |   |      |   |      |  |
| Ovophis_okinavensis        | : AAACCTCGGGCAAGGAACTAAAT | : AAACATATTAACCCNAAGCC | : CAATATATTAAGCAATAGCC | : AGTATAAAAAAGGNAAGCCCA | : TTCTGGATCCCGAAGAAACAGGG | : 6342 |      |   |      |   |      |   |      |  |
| Xenopeltis_unicolor        | : AAACCTCGGGCAAGGAACTAAAT | : AAACATATTAACCCNAAGCC | : CAATATATTAAGCAATAGCC | : AGTATAAAAAAGGNAAGCCCA | : TTCTGGATCCCGAAGAAACAGGG | : 6354 |      |   |      |   |      |   |      |  |
| Typhlops_reticulatus       | : AAACCTCGGGCAAGGAACTAAAT | : AAACATATTAACCCNAAGCC | : CAATATATTAAGCAATAGCC | : AGTATAAAAAAGGNAAGCCCA | : TTCTGGATCCCGAAGAAACAGGG | : 6279 |      |   |      |   |      |   |      |  |
| Leptotyphlops_dulcis       | : AAACCTCGGGCAAGGAACTAAAT | : AAACATATTAACCCNAAGCC | : CAATATATTAAGCAATAGCC | : AGTATAAAAAAGGNAAGCCCA | : TTCTGGATCCCGAAGAAACAGGG | : 6301 |      |   |      |   |      |   |      |  |
| Caiman_crocodilus          | : AAACCTCGGGCAAGGAACTAAAT | : AAACATATTAACCCNAAGCC | : CAATATATTAAGCAATAGCC | : AGTATAAAAAAGGNAAGCCCA | : TTCTGGATCCCGAAGAAACAGGG | : 6360 |      |   |      |   |      |   |      |  |
| Alligator_sinensis         | : AAACCTCGGGCAAGGAACTAAAT | : AAACATATTAACCCNAAGCC | : CAATATATTAAGCAATAGCC | : AGTATAAAAAAGGNAAGCCCA | : TTCTGGATCCCGAAGAAACAGGG | : 6390 |      |   |      |   |      |   |      |  |
| Alligator_mississippiensis | : AAACCTCGGGCAAGGAACTAAAT | : AAACATATTAACCCNAAGCC | : CAATATATTAAGCAATAGCC | : AGTATAAAAAAGGNAAGCCCA | : TTCTGGATCCCGAAGAAACAGGG | : 6339 |      |   |      |   |      |   |      |  |
| Gavialis_gangeticus        | : AAACCTCGGGCAAGGAACTAAAT | : AAACATATTAACCCNAAGCC | : CAATATATTAAGCAATAGCC | : AGTATAAAAAAGGNAAGCCCA | : TTCTGGATCCCGAAGAAACAGGG | : 6405 |      |   |      |   |      |   |      |  |
| Crocodylus_moreletii       | : AAACCTCGGGCAAGGAACTAAAT | : AAACATATTAACCCNAAGCC | : CAATATATTAAGCAATAGCC | : AGTATAAAAAAGGNAAGCCCA | : TTCTGGATCCCGAAGAAACAGGG | : 6381 |      |   |      |   |      |   |      |  |
| Dogania_subplana           | : AAACCTCGGGCAAGGAACTAAAT | : AAACATATTAACCCNAAGCC | : CAATATATTAAGCAATAGCC | : AGTATAAAAAAGGNAAGCCCA | : TTCTGGATCCCGAAGAAACAGGG | : 6309 |      |   |      |   |      |   |      |  |
| Pelomedusa_subrufa         | : AAACCTCGGGCAAGGAACTAAAT | : AAACATATTAACCCNAAGCC | : CAATATATTAAGCAATAGCC | : AGTATAAAAAAGGNAAGCCCA | : TTCTGGATCCCGAAGAAACAGGG | : 6330 |      |   |      |   |      |   |      |  |
| Chrysemys_picta            | : AAACCTCGGGCAAGGAACTAAAT | : AAACATATTAACCCNAAGCC | : CAATATATTAAGCAATAGCC | : AGTATAAAAAAGGNAAGCCCA | : TTCTGGATCCCGAAGAAACAGGG | : 6348 |      |   |      |   |      |   |      |  |
| Chelonia_mydas             | : AAACCTCGGGCAAGGAACTAAAT | : AAACATATTAACCCNAAGCC | : CAATATATTAAGCAATAGCC | : AGTATAAAAAAGGNAAGCCCA | : TTCTGGATCCCGAAGAAACAGGG | : 6351 |      |   |      |   |      |   |      |  |
| Tinamus_major              | : AAACCTCGGGCAAGGAACTAAAT | : AAACATATTAACCCNAAGCC | : CAATATATTAAGCAATAGCC | : AGTATAAAAAAGGNAAGCCCA | : TTCTGGATCCCGAAGAAACAGGG | : 6327 |      |   |      |   |      |   |      |  |
| Smithornis_sharpei         | : AAACCTCGGGCAAGGAACTAAAT | : AAACATATTAACCCNAAGCC | : CAATATATTAAGCAATAGCC | : AGTATAAAAAAGGNAAGCCCA | : TTCTGGATCCCGAAGAAACAGGG | : 6336 |      |   |      |   |      |   |      |  |
| Corvus_frugilegus          | : AAACCTCGGGCAAGGAACTAAAT | : AAACATATTAACCCNAAGCC | : CAATATATTAAGCAATAGCC | : AGTATAAAAAAGGNAAGCCCA | : TTCTGGATCCCGAAGAAACAGGG | : 6336 |      |   |      |   |      |   |      |  |
| Vidua_chalybeata           | : AAACCTCGGGCAAGGAACTAAAT | : AAACATATTAACCCNAAGCC | : CAATATATTAAGCAATAGCC | : AGTATAAAAAAGGNAAGCCCA | : TTCTGGATCCCGAAGAAACAGGG | : 6336 |      |   |      |   |      |   |      |  |
| Buteo_buteo                | : AAACCTCGGGCAAGGAACTAAAT | : AAACATATTAACCCNAAGCC | : CAATATATTAAGCAATAGCC | : AGTATAAAAAAGGNAAGCCCA | : TTCTGGATCCCGAAGAAACAGGG | : 6336 |      |   |      |   |      |   |      |  |
| Falco_peregrinus           | : AAACCTCGGGCAAGGAACTAAAT | : AAACATATTAACCCNAAGCC | : CAATATATTAAGCAATAGCC | : AGTATAAAAAAGGNAAGCCCA | : TTCTGGATCCCGAAGAAACAGGG | : 6333 |      |   |      |   |      |   |      |  |
| Dromaius_novaeollandiae    | : AAACCTCGGGCAAGGAACTAAAT | : AAACATATTAACCCNAAGCC | : CAATATATTAAGCAATAGCC | : AGTATAAAAAAGGNAAGCCCA | : TTCTGGATCCCGAAGAAACAGGG | : 6330 |      |   |      |   |      |   |      |  |
| Struthio_camelus           | : AAACCTCGGGCAAGGAACTAAAT | : AAACATATTAACCCNAAGCC | : CAATATATTAAGCAATAGCC | : AGTATAAAAAAGGNAAGCCCA | : TTCTGGATCCCGAAGAAACAGGG | : 6336 |      |   |      |   |      |   |      |  |
| Apteryx_haastii            | : AAACCTCGGGCAAGGAACTAAAT | : AAACATATTAACCCNAAGCC | : CAATATATTAAGCAATAGCC | : AGTATAAAAAAGGNAAGCCCA | : TTCTGGATCCCGAAGAAACAGGG | : 6333 |      |   |      |   |      |   |      |  |
| Rhea_americanana           | : AAACCTCGGGCAAGGAACTAAAT | : AAACATATTAACCCNAAGCC | : CAATATATTAAGCAATAGCC | : AGTATAAAAAAGGNAAGCCCA | : TTCTGGATCCCGAAGAAACAGGG | : 6336 |      |   |      |   |      |   |      |  |
| Gallus_gallus              | : AAACCTCGGGCAAGGAACTAAAT | : AAACATATTAACCCNAAGCC | : CAATATATTAAGCAATAGCC | : AGTATAAAAAAGGNAAGCCCA | : TTCTGGATCCCGAAGAAACAGGG | : 6330 |      |   |      |   |      |   |      |  |
| Ciconia_ciconia            | : AAACCTCGGGCAAGGAACTAAAT | : AAACATATTAACCCNAAGCC | : CAATATATTAAGCAATAGCC | : AGTATAAAAAAGGNAAGCCCA | : TTCTGGATCCCGAAGAAACAGGG | : 6336 |      |   |      |   |      |   |      |  |
| Ciconia_boyciana           | : AAACCTCGGGCAAGGAACTAAAT | : AAACATATTAACCCNAAGCC | : CAATATATTAAGCAATAGCC | : AGTATAAAAAAGGNAAGCCCA | : TTCTGGATCCCGAAGAAACAGGG | : 6336 |      |   |      |   |      |   |      |  |
| Iguana_iguana              | : AAACCTCGGGCAAGGAACTAAAT | : AAACATATTAACCCNAAGCC | : CAATATATTAAGCAATAGCC | : AGTATAAAAAAGGNAAGCCCA | : TTCTGGATCCCGAAGAAACAGGG | : 6324 |      |   |      |   |      |   |      |  |
| Fumeces_egregius           | : AAACCTCGGGCAAGGAACTAAAT | : AAACATATTAACCCNAAGCC | : CAATATATTAAGCAATAGCC | : AGTATAAAAAAGGNAAGCCCA | : TTCTGGATCCCGAAGAAACAGGG | : 6327 |      |   |      |   |      |   |      |  |
| Sphenodon_punctatus        | : AAACCTCGGGCAAGGAACTAAAT | : AAACATATTAACCCNAAGCC | : CAATATATTAAGCAATAGCC | : AGTATAAAAAAGGNAAGCCCA | : TTCTGGATCCCGAAGAAACAGGG | : 6327 |      |   |      |   |      |   |      |  |
| Sceloporus_occidentalis    | : AAACCTCGGGCAAGGAACTAAAT | : AAACATATTAACCCNAAGCC | : CAATATATTAAGCAATAGCC | : AGTATAAAAAAGGNAAGCCCA | : TTCTGGATCCCGAAGAAACAGGG | : 6327 |      |   |      |   |      |   |      |  |
| Cordylus_warreni           | : AAACCTCGGGCAAGGAACTAAAT | : AAACATATTAACCCNAAGCC | : CAATATATTAAGCAATAGCC | : AGTATAAAAAAGGNAAGCCCA | : TTCTGGATCCCGAAGAAACAGGG | : 6336 |      |   |      |   |      |   |      |  |
| Abronia_graminea           | : AAACCTCGGGCAAGGAACTAAAT | : AAACATATTAACCCNAAGCC | : CAATATATTAAGCAATAGCC | : AGTATAAAAAAGGNAAGCCCA | : TTCTGGATCCCGAAGAAACAGGG | : 6327 |      |   |      |   |      |   |      |  |
| Varanus_komodoensis        | : AAACCTCGGGCAAGGAACTAAAT | : AAACATATTAACCCNAAGCC | : CAATATATTAAGCAATAGCC | : AGTATAAAAAAGGNAAGCCCA | : TTCTGGATCCCGAAGAAACAGGG | : 6315 |      |   |      |   |      |   |      |  |
| Varanus_crocodilurus       | : AAACCTCGGGCAAGGAACTAAAT | : AAACATATTAACCCNAAGCC | : CAATATATTAAGCAATAGCC | : AGTATAAAAAAGGNAAGCCCA | : TTCTGGATCCCGAAGAAACAGGG | : 6369 |      |   |      |   |      |   |      |  |
| Rhineura_floridana         | : AAACCTCGGGCAAGGAACTAAAT | : AAACATATTAACCCNAAGCC | : CAATATATTAAGCAATAGCC | : AGTATAAAAAAGGNAAGCCCA | : TTCTGGATCCCGAAGAAACAGGG | : 6309 |      |   |      |   |      |   |      |  |
| Geocalamus_acutus          | : AAACCTCGGGCAAGGAACTAAAT | : AAACATATTAACCCNAAGCC | : CAATATATTAAGCAATAGCC | : AGTATAAAAAAGGNAAGCCCA | : TTCTGGATCCCGAAGAAACAGGG | : 6300 |      |   |      |   |      |   |      |  |
| Diplometopon_zarudnyi      | : AAACCTCGGGCAAGGAACTAAAT | : AAACATATTAACCCNAAGCC | : CAATATATTAAGCAATAGCC | : AGTATAAAAAAGGNAAGCCCA | : TTCTGGATCCCGAAGAAACAGGG | : 6309 |      |   |      |   |      |   |      |  |
| Amphisbaena_schmidti       | : AAACCTCGGGCAAGGAACTAAAT | : AAACATATTAACCCNAAGCC | : CAATATATTAAGCAATAGCC | : AGTATAAAAAAGGNAAGCCCA | : TTCTGGATCCCGAAGAAACAGGG | : 6309 |      |   |      |   |      |   |      |  |
| Bipes_tridactylus          | : AAACCTCGGGCAAGGAACTAAAT | : AAACATATTAACCCNAAGCC | : CAATATATTAAGCAATAGCC | : AGTATAAAAAAGGNAAGCCCA | : TTCTGGATCCCGAAGAAACAGGG | : 6297 |      |   |      |   |      |   |      |  |
| Bipes_capaliculatus        | : AAACCTCGGGCAAGGAACTAAAT | : AAACATATTAACCCNAAGCC | : CAATATATTAAGCAATAGCC | : AGTATAAAAAAGGNAAGCCCA | : TTCTGGATCCCGAAGAAACAGGG | : 6309 |      |   |      |   |      |   |      |  |
| Bipes_banalis              | : AAACCTCGGGCAAGGAACTAAAT | : AAACATATTAACCCNAAGCC | : CAATATATTAAGCAATAGCC | : AGTATAAAAAAGGNAAGCCCA | : TTCTGGATCCCGAAGAAACAGGG | : 6351 |      |   |      |   |      |   |      |  |
| Anolis_carolinensis        | : AAACCTCGGGCAAGGAACTAAAT | : AAACATATTAACCCNAAGCC | : CAATATATTAAGCAATAGCC | : AGTATAAAAAAGGNAAGCCCA | : TTCTGGATCCCGAAGAAACAGGG | : 5993 |      |   |      |   |      |   |      |  |
| Ophisaurus_atnuatus        | : AAACCTCGGGCAAGGAACTAAAT | : AAACATATTAACCCNAAGCC | : CAATATATTAAGCAATAGCC | : AGTATAAAAAAGGNAAGCCCA | : TTCTGGATCCCGAAGAAACAGGG | : 5952 |      |   |      |   |      |   |      |  |
| Varanus_salvator           | : AAACCTCGGGCAAGGAACTAAAT | : AAACATATTAACCCNAAGCC | : CAATATATTAAGCAATAGCC | : AGTATAAAAAAGGNAAGCCCA | : TTCTGGATCCCGAAGAAACAGGG | : 6361 |      |   |      |   |      |   |      |  |
| Mertensiella_luschani      | : AAACCTCGGGCAAGGAACTAAAT | : AAACATATTAACCCNAAGCC | : CAATATATTAAGCAATAGCC | : AGTATAAAAAAGGNAAGCCCA | : TTCTGGATCCCGAAGAAACAGGG | : 6342 |      |   |      |   |      |   |      |  |
| Xenopus_laevis             | : AAACCTCGGGCAAGGAACTAAAT | : AAACATATTAACCCNAAGCC | : CAATATATTAAGCAATAGCC | : AGTATAAAAAAGGNAAGCCCA | : TTCTGGATCCCGAAGAAACAGGG | : 6333 |      |   |      |   |      |   |      |  |

```

*          6800          *          6820          *          6840          *          6860          *          6880          *          6900          *
Bos_taurus           : ATCCCTCATTCCAGGCGTAAGCCAGAGCAGCAGCAAAAAAGGCGCCGATATCGAGCAATCCGAAATCCGCGCGAATTAACAAAGCCAGTAAACAAAGCCAAACGAGGCGAGGAG : 6466
Hylobates_lar       : ACTACCCATAAGCGGCGTAAGCCAGAGCAGCAGCAAAAAAGGCGCCGATATCGAGCAATCCGAAATCCGCGCGAATTAACAAAGCCAGTAAACAAAGCCAAACGAGGCGAGGAG : 6475
Lemur_catta         : ATTTCACATATAGCGGCGTAAGCCAGAGCAGCAGCAAAAAAGGCGCCGATATCGAGCAATCCGAAATCCGCGCGAATTAACAAAGCCAGTAAACAAAGCCAAACGAGGCGAGGAG : 6472
Nycticebus_coucang  : ATCTACTATAGCGGCGTAAGCCAGAGCAGCAGCAAAAAAGGCGCCGATATCGAGCAATCCGAAATCCGCGCGAATTAACAAAGCCAGTAAACAAAGCCAAACGAGGCGAGGAG : 6469
Tarsius_bancanus    : GATACATATAGCGGCGTAAGCCAGAGCAGCAGCAAAAAAGGCGCCGATATCGAGCAATCCGAAATCCGCGCGAATTAACAAAGCCAGTAAACAAAGCCAAACGAGGCGAGGAG : 6469
Gorilla_gorilla     : ACCCGCCATAGCGGCGTAAGCCAGAGCAGCAGCAAAAAAGGCGCCGATATCGAGCAATCCGAAATCCGCGCGAATTAACAAAGCCAGTAAACAAAGCCAAACGAGGCGAGGAG : 6475
Homo_sapiens        : ACCCGCCATAGCGGCGTAAGCCAGAGCAGCAGCAAAAAAGGCGCCGATATCGAGCAATCCGAAATCCGCGCGAATTAACAAAGCCAGTAAACAAAGCCAAACGAGGCGAGGAG : 6466
Papio_hamadryas     : ACCCGCCATAGCGGCGTAAGCCAGAGCAGCAGCAAAAAAGGCGCCGATATCGAGCAATCCGAAATCCGCGCGAATTAACAAAGCCAGTAAACAAAGCCAAACGAGGCGAGGAG : 6478
Cebus_albifrons     : ATTCCCGATAGCGGCGTAAGCCAGAGCAGCAGCAAAAAAGGCGCCGATATCGAGCAATCCGAAATCCGCGCGAATTAACAAAGCCAGTAAACAAAGCCAAACGAGGCGAGGAG : 6475
Macaca_sylvanus     : ACCCGCCATAGCGGCGTAAGCCAGAGCAGCAGCAAAAAAGGCGCCGATATCGAGCAATCCGAAATCCGCGCGAATTAACAAAGCCAGTAAACAAAGCCAAACGAGGCGAGGAG : 6472
Pongo_pygmaeus      : ACCCGCCATAGCGGCGTAAGCCAGAGCAGCAGCAAAAAAGGCGCCGATATCGAGCAATCCGAAATCCGCGCGAATTAACAAAGCCAGTAAACAAAGCCAAACGAGGCGAGGAG : 6475
Pan_paniscus        : ACCCGCCATAGCGGCGTAAGCCAGAGCAGCAGCAAAAAAGGCGCCGATATCGAGCAATCCGAAATCCGCGCGAATTAACAAAGCCAGTAAACAAAGCCAAACGAGGCGAGGAG : 6475
Agkistrodon_piscivorus : GATAAACCCTAAGCGGCGTAAGCCAGAGCAGCAGCAAAAAAGGCGCCGATATCGAGCAATCCGAAATCCGCGCGAATTAACAAAGCCAGTAAACAAAGCCAAACGAGGCGAGGAG : 6475
Pantherophis_guttatus : ACNACAACCTAAGCGGCGTAAGCCAGAGCAGCAGCAAAAAAGGCGCCGATATCGAGCAATCCGAAATCCGCGCGAATTAACAAAGCCAGTAAACAAAGCCAAACGAGGCGAGGAG : 6475
Dinodon_semicarinatus : ACNACAACCTAAGCGGCGTAAGCCAGAGCAGCAGCAAAAAAGGCGCCGATATCGAGCAATCCGAAATCCGCGCGAATTAACAAAGCCAGTAAACAAAGCCAAACGAGGCGAGGAG : 6475
Boa_constrictor     : ACCACAACCTAAGCGGCGTAAGCCAGAGCAGCAGCAAAAAAGGCGCCGATATCGAGCAATCCGAAATCCGCGCGAATTAACAAAGCCAGTAAACAAAGCCAAACGAGGCGAGGAG : 6484
Python_regius       : ACCACAACCTAAGCGGCGTAAGCCAGAGCAGCAGCAAAAAAGGCGCCGATATCGAGCAATCCGAAATCCGCGCGAATTAACAAAGCCAGTAAACAAAGCCAAACGAGGCGAGGAG : 6481
Acrochordus_granulatus : ACNACAACCTAAGCGGCGTAAGCCAGAGCAGCAGCAAAAAAGGCGCCGATATCGAGCAATCCGAAATCCGCGCGAATTAACAAAGCCAGTAAACAAAGCCAAACGAGGCGAGGAG : 6478
Cylindrophis_ruffus : GCATACCTAAGCGGCGTAAGCCAGAGCAGCAGCAAAAAAGGCGCCGATATCGAGCAATCCGAAATCCGCGCGAATTAACAAAGCCAGTAAACAAAGCCAAACGAGGCGAGGAG : 6448
Ovophis_okinavensis : GCATACCTAAGCGGCGTAAGCCAGAGCAGCAGCAAAAAAGGCGCCGATATCGAGCAATCCGAAATCCGCGCGAATTAACAAAGCCAGTAAACAAAGCCAAACGAGGCGAGGAG : 6475
Xenopeltis_unicolor : GCATACCTAAGCGGCGTAAGCCAGAGCAGCAGCAAAAAAGGCGCCGATATCGAGCAATCCGAAATCCGCGCGAATTAACAAAGCCAGTAAACAAAGCCAAACGAGGCGAGGAG : 6487
Typhlops_reticulatus : GTCACACAAAATAGGCGTAAGCCAGAGCAGCAGCAAAAAAGGCGCCGATATCGAGCAATCCGAAATCCGCGCGAATTAACAAAGCCAGTAAACAAAGCCAAACGAGGCGAGGAG : 6412
Leptotyphlops_dulcis : GCATACCTAAGCGGCGTAAGCCAGAGCAGCAGCAAAAAAGGCGCCGATATCGAGCAATCCGAAATCCGCGCGAATTAACAAAGCCAGTAAACAAAGCCAAACGAGGCGAGGAG : 6434
Caiman_crocodilus   : ATTACCAACCTAAGCGGCGTAAGCCAGAGCAGCAGCAAAAAAGGCGCCGATATCGAGCAATCCGAAATCCGCGCGAATTAACAAAGCCAGTAAACAAAGCCAAACGAGGCGAGGAG : 6493
Alligator_sinensis  : ATTACCAACCTAAGCGGCGTAAGCCAGAGCAGCAGCAAAAAAGGCGCCGATATCGAGCAATCCGAAATCCGCGCGAATTAACAAAGCCAGTAAACAAAGCCAAACGAGGCGAGGAG : 6523
Alligator_mississippiensis : ATTACCAACCTAAGCGGCGTAAGCCAGAGCAGCAGCAAAAAAGGCGCCGATATCGAGCAATCCGAAATCCGCGCGAATTAACAAAGCCAGTAAACAAAGCCAAACGAGGCGAGGAG : 6472
Gavialis_gangeticus : ATAGTTCACACCTAAGCGGCGTAAGCCAGAGCAGCAGCAAAAAAGGCGCCGATATCGAGCAATCCGAAATCCGCGCGAATTAACAAAGCCAGTAAACAAAGCCAAACGAGGCGAGGAG : 6538
Crocodylus_moreletii : ATAGTTCACACCTAAGCGGCGTAAGCCAGAGCAGCAGCAAAAAAGGCGCCGATATCGAGCAATCCGAAATCCGCGCGAATTAACAAAGCCAGTAAACAAAGCCAAACGAGGCGAGGAG : 6514
Dogania_subplana    : ACCACAACCTAAGCGGCGTAAGCCAGAGCAGCAGCAAAAAAGGCGCCGATATCGAGCAATCCGAAATCCGCGCGAATTAACAAAGCCAGTAAACAAAGCCAAACGAGGCGAGGAG : 6442
Pelomedusa_subrufa  : GCGCATACCTAAGCGGCGTAAGCCAGAGCAGCAGCAAAAAAGGCGCCGATATCGAGCAATCCGAAATCCGCGCGAATTAACAAAGCCAGTAAACAAAGCCAAACGAGGCGAGGAG : 6463
Chrysemys_picta     : ACCACAACCTAAGCGGCGTAAGCCAGAGCAGCAGCAAAAAAGGCGCCGATATCGAGCAATCCGAAATCCGCGCGAATTAACAAAGCCAGTAAACAAAGCCAAACGAGGCGAGGAG : 6481
Chelonia_mydas      : ACTTCACACCTAAGCGGCGTAAGCCAGAGCAGCAGCAAAAAAGGCGCCGATATCGAGCAATCCGAAATCCGCGCGAATTAACAAAGCCAGTAAACAAAGCCAAACGAGGCGAGGAG : 6484
Tinamus_major       : ACTTCACACCTAAGCGGCGTAAGCCAGAGCAGCAGCAAAAAAGGCGCCGATATCGAGCAATCCGAAATCCGCGCGAATTAACAAAGCCAGTAAACAAAGCCAAACGAGGCGAGGAG : 6460
Smithornis_sharpei  : GTCCACATACCTAAGCGGCGTAAGCCAGAGCAGCAGCAAAAAAGGCGCCGATATCGAGCAATCCGAAATCCGCGCGAATTAACAAAGCCAGTAAACAAAGCCAAACGAGGCGAGGAG : 6469
Corvus_frugilegus   : TCCCGCCATACCTAAGCGGCGTAAGCCAGAGCAGCAGCAAAAAAGGCGCCGATATCGAGCAATCCGAAATCCGCGCGAATTAACAAAGCCAGTAAACAAAGCCAAACGAGGCGAGGAG : 6469
Vidua_chalybeata    : TCCCGCCATACCTAAGCGGCGTAAGCCAGAGCAGCAGCAAAAAAGGCGCCGATATCGAGCAATCCGAAATCCGCGCGAATTAACAAAGCCAGTAAACAAAGCCAAACGAGGCGAGGAG : 6469
Falco_peregrinus    : TCCCGCCATACCTAAGCGGCGTAAGCCAGAGCAGCAGCAAAAAAGGCGCCGATATCGAGCAATCCGAAATCCGCGCGAATTAACAAAGCCAGTAAACAAAGCCAAACGAGGCGAGGAG : 6466
Dromaius_novaeollandiae : AONTTCACACCTAAGCGGCGTAAGCCAGAGCAGCAGCAAAAAAGGCGCCGATATCGAGCAATCCGAAATCCGCGCGAATTAACAAAGCCAGTAAACAAAGCCAAACGAGGCGAGGAG : 6463
Struthio_camelus    : AONTTCACACCTAAGCGGCGTAAGCCAGAGCAGCAGCAAAAAAGGCGCCGATATCGAGCAATCCGAAATCCGCGCGAATTAACAAAGCCAGTAAACAAAGCCAAACGAGGCGAGGAG : 6469
Apteryx_haastii     : AONTTCACACCTAAGCGGCGTAAGCCAGAGCAGCAGCAAAAAAGGCGCCGATATCGAGCAATCCGAAATCCGCGCGAATTAACAAAGCCAGTAAACAAAGCCAAACGAGGCGAGGAG : 6466
Rhea_americanana    : TCCCGCCATACCTAAGCGGCGTAAGCCAGAGCAGCAGCAAAAAAGGCGCCGATATCGAGCAATCCGAAATCCGCGCGAATTAACAAAGCCAGTAAACAAAGCCAAACGAGGCGAGGAG : 6469
Gallus_gallus       : TCCCGCCATACCTAAGCGGCGTAAGCCAGAGCAGCAGCAAAAAAGGCGCCGATATCGAGCAATCCGAAATCCGCGCGAATTAACAAAGCCAGTAAACAAAGCCAAACGAGGCGAGGAG : 6463
Ciconia_ciconia     : TCCCGCCATACCTAAGCGGCGTAAGCCAGAGCAGCAGCAAAAAAGGCGCCGATATCGAGCAATCCGAAATCCGCGCGAATTAACAAAGCCAGTAAACAAAGCCAAACGAGGCGAGGAG : 6469
Ciconia_boyciiana   : TCCCGCCATACCTAAGCGGCGTAAGCCAGAGCAGCAGCAAAAAAGGCGCCGATATCGAGCAATCCGAAATCCGCGCGAATTAACAAAGCCAGTAAACAAAGCCAAACGAGGCGAGGAG : 6469
Iguana_iguana       : ACCACAACCTAAGCGGCGTAAGCCAGAGCAGCAGCAAAAAAGGCGCCGATATCGAGCAATCCGAAATCCGCGCGAATTAACAAAGCCAGTAAACAAAGCCAAACGAGGCGAGGAG : 6457
Fumeaces_egregius   : ACCCGCCATACCTAAGCGGCGTAAGCCAGAGCAGCAGCAAAAAAGGCGCCGATATCGAGCAATCCGAAATCCGCGCGAATTAACAAAGCCAGTAAACAAAGCCAAACGAGGCGAGGAG : 6460
Sphenodon_punctatus : ACCACAACCTAAGCGGCGTAAGCCAGAGCAGCAGCAAAAAAGGCGCCGATATCGAGCAATCCGAAATCCGCGCGAATTAACAAAGCCAGTAAACAAAGCCAAACGAGGCGAGGAG : 6460
Sceloporus_occidentalis : CCAACCCAAAACGCGTAAGCCAGAGCAGCAGCAAAAAAGGCGCCGATATCGAGCAATCCGAAATCCGCGCGAATTAACAAAGCCAGTAAACAAAGCCAAACGAGGCGAGGAG : 6460
Abronia_graminea    : TCCCGCCATACCTAAGCGGCGTAAGCCAGAGCAGCAGCAAAAAAGGCGCCGATATCGAGCAATCCGAAATCCGCGCGAATTAACAAAGCCAGTAAACAAAGCCAAACGAGGCGAGGAG : 6460
Shinisaurus_crocodilurus : ACCCGCCATACCTAAGCGGCGTAAGCCAGAGCAGCAGCAAAAAAGGCGCCGATATCGAGCAATCCGAAATCCGCGCGAATTAACAAAGCCAGTAAACAAAGCCAAACGAGGCGAGGAG : 6448
Varanus_komodoensis  : GTACCCCAATACCTAAGCGGCGTAAGCCAGAGCAGCAGCAAAAAAGGCGCCGATATCGAGCAATCCGAAATCCGCGCGAATTAACAAAGCCAGTAAACAAAGCCAAACGAGGCGAGGAG : 6502
Rhineura_floridana  : ACCAAAATACCTAAGCGGCGTAAGCCAGAGCAGCAGCAAAAAAGGCGCCGATATCGAGCAATCCGAAATCCGCGCGAATTAACAAAGCCAGTAAACAAAGCCAAACGAGGCGAGGAG : 6442
Geocalamus_acutus   : ACCACAACCTAAGCGGCGTAAGCCAGAGCAGCAGCAAAAAAGGCGCCGATATCGAGCAATCCGAAATCCGCGCGAATTAACAAAGCCAGTAAACAAAGCCAAACGAGGCGAGGAG : 6433
Diplometopon_zarudnyi : ACCCTACCAAAATAGCGGCGTAAGCCAGAGCAGCAGCAAAAAAGGCGCCGATATCGAGCAATCCGAAATCCGCGCGAATTAACAAAGCCAGTAAACAAAGCCAAACGAGGCGAGGAG : 6442
Amphisbaena_schmidti : ACCCGACTACAAATAGCGGCGTAAGCCAGAGCAGCAGCAAAAAAGGCGCCGATATCGAGCAATCCGAAATCCGCGCGAATTAACAAAGCCAGTAAACAAAGCCAAACGAGGCGAGGAG : 6442
Bipes_tridactylus   : ACCCTACCAAAATAGCGGCGTAAGCCAGAGCAGCAGCAAAAAAGGCGCCGATATCGAGCAATCCGAAATCCGCGCGAATTAACAAAGCCAGTAAACAAAGCCAAACGAGGCGAGGAG : 6430
Bipes_canaliculatus : GCCACAACCTAAGCGGCGTAAGCCAGAGCAGCAGCAAAAAAGGCGCCGATATCGAGCAATCCGAAATCCGCGCGAATTAACAAAGCCAGTAAACAAAGCCAAACGAGGCGAGGAG : 6442
Bipes_biporus       : GCCACAACCTAAGCGGCGTAAGCCAGAGCAGCAGCAAAAAAGGCGCCGATATCGAGCAATCCGAAATCCGCGCGAATTAACAAAGCCAGTAAACAAAGCCAAACGAGGCGAGGAG : 6484
Anolis_carolinensis : TCCCGCCATACCTAAGCGGCGTAAGCCAGAGCAGCAGCAAAAAAGGCGCCGATATCGAGCAATCCGAAATCCGCGCGAATTAACAAAGCCAGTAAACAAAGCCAAACGAGGCGAGGAG : 6126
Ophisaurus_atnuatus : TCCCGCCATACCTAAGCGGCGTAAGCCAGAGCAGCAGCAAAAAAGGCGCCGATATCGAGCAATCCGAAATCCGCGCGAATTAACAAAGCCAGTAAACAAAGCCAAACGAGGCGAGGAG : 6085
Varanus_salvator     : GTACCCCAATACCTAAGCGGCGTAAGCCAGAGCAGCAGCAAAAAAGGCGCCGATATCGAGCAATCCGAAATCCGCGCGAATTAACAAAGCCAGTAAACAAAGCCAAACGAGGCGAGGAG : 6494
Mertensiella_luschani : TCCCGCCATACCTAAGCGGCGTAAGCCAGAGCAGCAGCAAAAAAGGCGCCGATATCGAGCAATCCGAAATCCGCGCGAATTAACAAAGCCAGTAAACAAAGCCAAACGAGGCGAGGAG : 6475
Xenopus_laevis      : GTACCCCAATACCTAAGCGGCGTAAGCCAGAGCAGCAGCAAAAAAGGCGCCGATATCGAGCAATCCGAAATCCGCGCGAATTAACAAAGCCAGTAAACAAAGCCAAACGAGGCGAGGAG : 6466

```

```

6920      *      6940      *      6960      *      6980      *      7000      *      7020      *      7040
Bos_taurus      : GCTGGGGGGCAATAACCAAAACCAACCGGAAATAACATAGCCATCACTCAACCGCTAAATAGGGGAAATAACAGCGAGTACCAATATAACCCCAACCAATACATGCAAAACCAATATAATACAA : 6599
Hylobates_lar  : GCTGGGGGGCAATAACCAAAACCAACCGGAAATAACATAGCCATCACTCAACCGCTAAATAGGGGAAATAACAGCGAGTACCAATATAACCCCAACCAATACATGCAAAACCAATATAATACAA : 6608
Lemur_catta     : GCTGGGGGGCAATAACCAAAACCAACCGGAAATAACATAGCCATCACTCAACCGCTAAATAGGGGAAATAACAGCGAGTACCAATATAACCCCAACCAATACATGCAAAACCAATATAATACAA : 6605
Nycticebus_coucang : GCTGGGGGGCAATAACCAAAACCAACCGGAAATAACATAGCCATCACTCAACCGCTAAATAGGGGAAATAACAGCGAGTACCAATATAACCCCAACCAATACATGCAAAACCAATATAATACAA : 6602
Tarsius_bancanus : GCTGGGGGGCAATAACCAAAACCAACCGGAAATAACATAGCCATCACTCAACCGCTAAATAGGGGAAATAACAGCGAGTACCAATATAACCCCAACCAATACATGCAAAACCAATATAATACAA : 6602
Gorilla_gorilla : GCTGGGGGGCAATAACCAAAACCAACCGGAAATAACATAGCCATCACTCAACCGCTAAATAGGGGAAATAACAGCGAGTACCAATATAACCCCAACCAATACATGCAAAACCAATATAATACAA : 6608
Homo_sapiens    : GCTGGGGGGCAATAACCAAAACCAACCGGAAATAACATAGCCATCACTCAACCGCTAAATAGGGGAAATAACAGCGAGTACCAATATAACCCCAACCAATACATGCAAAACCAATATAATACAA : 6599
Papio_hamadryas : GCTGGGGGGCAATAACCAAAACCAACCGGAAATAACATAGCCATCACTCAACCGCTAAATAGGGGAAATAACAGCGAGTACCAATATAACCCCAACCAATACATGCAAAACCAATATAATACAA : 6611
Cebus_albifrons : GCTGGGGGGCAATAACCAAAACCAACCGGAAATAACATAGCCATCACTCAACCGCTAAATAGGGGAAATAACAGCGAGTACCAATATAACCCCAACCAATACATGCAAAACCAATATAATACAA : 6608
Macaca_sylvanus : GCTGGGGGGCAATAACCAAAACCAACCGGAAATAACATAGCCATCACTCAACCGCTAAATAGGGGAAATAACAGCGAGTACCAATATAACCCCAACCAATACATGCAAAACCAATATAATACAA : 6605
Pongo_pygmaeus  : GCTGGGGGGCAATAACCAAAACCAACCGGAAATAACATAGCCATCACTCAACCGCTAAATAGGGGAAATAACAGCGAGTACCAATATAACCCCAACCAATACATGCAAAACCAATATAATACAA : 6608
Pan_paniscus    : GCTGGGGGGCAATAACCAAAACCAACCGGAAATAACATAGCCATCACTCAACCGCTAAATAGGGGAAATAACAGCGAGTACCAATATAACCCCAACCAATACATGCAAAACCAATATAATACAA : 6608
Agkistrodon_piscivorus : GAAATGGGGGATATAACCAAAACCAACCGGAAATAACATAGCCATCACTCAACCGCTAAATAGGGGAAATAACAGCGAGTACCAATATAACCCCAACCAATACATGCAAAACCAATATAATACAA : 6608
Pantherophis_guttatus : GCTGGGGGGCAATAACCAAAACCAACCGGAAATAACATAGCCATCACTCAACCGCTAAATAGGGGAAATAACAGCGAGTACCAATATAACCCCAACCAATACATGCAAAACCAATATAATACAA : 6608
Dinodon_semicarinatus : GCTGGGGGGCAATAACCAAAACCAACCGGAAATAACATAGCCATCACTCAACCGCTAAATAGGGGAAATAACAGCGAGTACCAATATAACCCCAACCAATACATGCAAAACCAATATAATACAA : 6608
Boa_constrictor : GCTGGGGGGCAATAACCAAAACCAACCGGAAATAACATAGCCATCACTCAACCGCTAAATAGGGGAAATAACAGCGAGTACCAATATAACCCCAACCAATACATGCAAAACCAATATAATACAA : 6617
Python_regius   : GCTGGGGGGCAATAACCAAAACCAACCGGAAATAACATAGCCATCACTCAACCGCTAAATAGGGGAAATAACAGCGAGTACCAATATAACCCCAACCAATACATGCAAAACCAATATAATACAA : 6614
Acrochordus_granulatus : GCTGGGGGGCAATAACCAAAACCAACCGGAAATAACATAGCCATCACTCAACCGCTAAATAGGGGAAATAACAGCGAGTACCAATATAACCCCAACCAATACATGCAAAACCAATATAATACAA : 6611
Chelydromys_rufus : GCTGGGGGGCAATAACCAAAACCAACCGGAAATAACATAGCCATCACTCAACCGCTAAATAGGGGAAATAACAGCGAGTACCAATATAACCCCAACCAATACATGCAAAACCAATATAATACAA : 6581
Ovophis_okinavensis : GAAATGGGGGATATAACCAAAACCAACCGGAAATAACATAGCCATCACTCAACCGCTAAATAGGGGAAATAACAGCGAGTACCAATATAACCCCAACCAATACATGCAAAACCAATATAATACAA : 6608
Xenopeltis_unicolor : GCTGGGGGGCAATAACCAAAACCAACCGGAAATAACATAGCCATCACTCAACCGCTAAATAGGGGAAATAACAGCGAGTACCAATATAACCCCAACCAATACATGCAAAACCAATATAATACAA : 6620
Thyphlops_reticulatus : GCTGGGGGGCAATAACCAAAACCAACCGGAAATAACATAGCCATCACTCAACCGCTAAATAGGGGAAATAACAGCGAGTACCAATATAACCCCAACCAATACATGCAAAACCAATATAATACAA : 6545
Leptotyphlops_dulcis : GCTGGGGGGCAATAACCAAAACCAACCGGAAATAACATAGCCATCACTCAACCGCTAAATAGGGGAAATAACAGCGAGTACCAATATAACCCCAACCAATACATGCAAAACCAATATAATACAA : 6567
Caiman_crocodilus : GCTGGGGGGCAATAACCAAAACCAACCGGAAATAACATAGCCATCACTCAACCGCTAAATAGGGGAAATAACAGCGAGTACCAATATAACCCCAACCAATACATGCAAAACCAATATAATACAA : 6626
Alligator_sinensis : GCTGGGGGGCAATAACCAAAACCAACCGGAAATAACATAGCCATCACTCAACCGCTAAATAGGGGAAATAACAGCGAGTACCAATATAACCCCAACCAATACATGCAAAACCAATATAATACAA : 6656
Alligator_mississippiensis : GAAATGGGGGATATAACCAAAACCAACCGGAAATAACATAGCCATCACTCAACCGCTAAATAGGGGAAATAACAGCGAGTACCAATATAACCCCAACCAATACATGCAAAACCAATATAATACAA : 6605
Gavialis_gangeticus : GCTGGGGGGCAATAACCAAAACCAACCGGAAATAACATAGCCATCACTCAACCGCTAAATAGGGGAAATAACAGCGAGTACCAATATAACCCCAACCAATACATGCAAAACCAATATAATACAA : 6671
Crocodylus_moreletii : GCTGGGGGGCAATAACCAAAACCAACCGGAAATAACATAGCCATCACTCAACCGCTAAATAGGGGAAATAACAGCGAGTACCAATATAACCCCAACCAATACATGCAAAACCAATATAATACAA : 6647
Dogania_subplana : GCTGGGGGGCAATAACCAAAACCAACCGGAAATAACATAGCCATCACTCAACCGCTAAATAGGGGAAATAACAGCGAGTACCAATATAACCCCAACCAATACATGCAAAACCAATATAATACAA : 6575
Pelomedusa_subrufa : GCTGGGGGGCAATAACCAAAACCAACCGGAAATAACATAGCCATCACTCAACCGCTAAATAGGGGAAATAACAGCGAGTACCAATATAACCCCAACCAATACATGCAAAACCAATATAATACAA : 6596
Chrysemys_picta : GCTGGGGGGCAATAACCAAAACCAACCGGAAATAACATAGCCATCACTCAACCGCTAAATAGGGGAAATAACAGCGAGTACCAATATAACCCCAACCAATACATGCAAAACCAATATAATACAA : 6614
Chelonia_mydas  : GCTGGGGGGCAATAACCAAAACCAACCGGAAATAACATAGCCATCACTCAACCGCTAAATAGGGGAAATAACAGCGAGTACCAATATAACCCCAACCAATACATGCAAAACCAATATAATACAA : 6617
Tinamus_major   : GCTGGGGGGCAATAACCAAAACCAACCGGAAATAACATAGCCATCACTCAACCGCTAAATAGGGGAAATAACAGCGAGTACCAATATAACCCCAACCAATACATGCAAAACCAATATAATACAA : 6593
Smithornis_sharpei : GCTGGGGGGCAATAACCAAAACCAACCGGAAATAACATAGCCATCACTCAACCGCTAAATAGGGGAAATAACAGCGAGTACCAATATAACCCCAACCAATACATGCAAAACCAATATAATACAA : 6602
Corvus_frugilegus : GCTGGGGGGCAATAACCAAAACCAACCGGAAATAACATAGCCATCACTCAACCGCTAAATAGGGGAAATAACAGCGAGTACCAATATAACCCCAACCAATACATGCAAAACCAATATAATACAA : 6602
Vidua_chalybeata : GCTGGGGGGCAATAACCAAAACCAACCGGAAATAACATAGCCATCACTCAACCGCTAAATAGGGGAAATAACAGCGAGTACCAATATAACCCCAACCAATACATGCAAAACCAATATAATACAA : 6602
Buteo_buteo     : GCTGGGGGGCAATAACCAAAACCAACCGGAAATAACATAGCCATCACTCAACCGCTAAATAGGGGAAATAACAGCGAGTACCAATATAACCCCAACCAATACATGCAAAACCAATATAATACAA : 6599
Falco_peregrinus : GCTGGGGGGCAATAACCAAAACCAACCGGAAATAACATAGCCATCACTCAACCGCTAAATAGGGGAAATAACAGCGAGTACCAATATAACCCCAACCAATACATGCAAAACCAATATAATACAA : 6596
Dromaius_novaeollandiae : GCTGGGGGGCAATAACCAAAACCAACCGGAAATAACATAGCCATCACTCAACCGCTAAATAGGGGAAATAACAGCGAGTACCAATATAACCCCAACCAATACATGCAAAACCAATATAATACAA : 6602
Struthio_camelus : GCTGGGGGGCAATAACCAAAACCAACCGGAAATAACATAGCCATCACTCAACCGCTAAATAGGGGAAATAACAGCGAGTACCAATATAACCCCAACCAATACATGCAAAACCAATATAATACAA : 6599
Apteryx_haastii : GCTGGGGGGCAATAACCAAAACCAACCGGAAATAACATAGCCATCACTCAACCGCTAAATAGGGGAAATAACAGCGAGTACCAATATAACCCCAACCAATACATGCAAAACCAATATAATACAA : 6602
Rhea_americanana : GCTGGGGGGCAATAACCAAAACCAACCGGAAATAACATAGCCATCACTCAACCGCTAAATAGGGGAAATAACAGCGAGTACCAATATAACCCCAACCAATACATGCAAAACCAATATAATACAA : 6596
Gallus_gallus   : GCTGGGGGGCAATAACCAAAACCAACCGGAAATAACATAGCCATCACTCAACCGCTAAATAGGGGAAATAACAGCGAGTACCAATATAACCCCAACCAATACATGCAAAACCAATATAATACAA : 6602
Ciconia_ciconia : GCTGGGGGGCAATAACCAAAACCAACCGGAAATAACATAGCCATCACTCAACCGCTAAATAGGGGAAATAACAGCGAGTACCAATATAACCCCAACCAATACATGCAAAACCAATATAATACAA : 6602
Ciconia_boyciana : GCTGGGGGGCAATAACCAAAACCAACCGGAAATAACATAGCCATCACTCAACCGCTAAATAGGGGAAATAACAGCGAGTACCAATATAACCCCAACCAATACATGCAAAACCAATATAATACAA : 6602
Iguana_iguana   : GCTGGGGGGCAATAACCAAAACCAACCGGAAATAACATAGCCATCACTCAACCGCTAAATAGGGGAAATAACAGCGAGTACCAATATAACCCCAACCAATACATGCAAAACCAATATAATACAA : 6590
Fumeces_egregius : GCTGGGGGGCAATAACCAAAACCAACCGGAAATAACATAGCCATCACTCAACCGCTAAATAGGGGAAATAACAGCGAGTACCAATATAACCCCAACCAATACATGCAAAACCAATATAATACAA : 6593
Sphenodon_punctatus : GCTGGGGGGCAATAACCAAAACCAACCGGAAATAACATAGCCATCACTCAACCGCTAAATAGGGGAAATAACAGCGAGTACCAATATAACCCCAACCAATACATGCAAAACCAATATAATACAA : 6593
Sceloporus_occidentalis : GCTGGGGGGCAATAACCAAAACCAACCGGAAATAACATAGCCATCACTCAACCGCTAAATAGGGGAAATAACAGCGAGTACCAATATAACCCCAACCAATACATGCAAAACCAATATAATACAA : 6593
Cordylus_warreni : GCTGGGGGGCAATAACCAAAACCAACCGGAAATAACATAGCCATCACTCAACCGCTAAATAGGGGAAATAACAGCGAGTACCAATATAACCCCAACCAATACATGCAAAACCAATATAATACAA : 6602
Abronia_graminea : GCTGGGGGGCAATAACCAAAACCAACCGGAAATAACATAGCCATCACTCAACCGCTAAATAGGGGAAATAACAGCGAGTACCAATATAACCCCAACCAATACATGCAAAACCAATATAATACAA : 6593
Shinisaurus_crocodilurus : GCTGGGGGGCAATAACCAAAACCAACCGGAAATAACATAGCCATCACTCAACCGCTAAATAGGGGAAATAACAGCGAGTACCAATATAACCCCAACCAATACATGCAAAACCAATATAATACAA : 6581
Varanus_komodoensis : GCTGGGGGGCAATAACCAAAACCAACCGGAAATAACATAGCCATCACTCAACCGCTAAATAGGGGAAATAACAGCGAGTACCAATATAACCCCAACCAATACATGCAAAACCAATATAATACAA : 6635
Rhineura_floridana : GCTGGGGGGCAATAACCAAAACCAACCGGAAATAACATAGCCATCACTCAACCGCTAAATAGGGGAAATAACAGCGAGTACCAATATAACCCCAACCAATACATGCAAAACCAATATAATACAA : 6575
Geocalamus_acutus : GCTGGGGGGCAATAACCAAAACCAACCGGAAATAACATAGCCATCACTCAACCGCTAAATAGGGGAAATAACAGCGAGTACCAATATAACCCCAACCAATACATGCAAAACCAATATAATACAA : 6566
Diplometopon_zarudnyi : GCTGGGGGGCAATAACCAAAACCAACCGGAAATAACATAGCCATCACTCAACCGCTAAATAGGGGAAATAACAGCGAGTACCAATATAACCCCAACCAATACATGCAAAACCAATATAATACAA : 6575
Amphisbaena_schmidti : GCTGGGGGGCAATAACCAAAACCAACCGGAAATAACATAGCCATCACTCAACCGCTAAATAGGGGAAATAACAGCGAGTACCAATATAACCCCAACCAATACATGCAAAACCAATATAATACAA : 6575
Bipes_tridactylus : GCTGGGGGGCAATAACCAAAACCAACCGGAAATAACATAGCCATCACTCAACCGCTAAATAGGGGAAATAACAGCGAGTACCAATATAACCCCAACCAATACATGCAAAACCAATATAATACAA : 6563
Bipes_canaliculatus : GCTGGGGGGCAATAACCAAAACCAACCGGAAATAACATAGCCATCACTCAACCGCTAAATAGGGGAAATAACAGCGAGTACCAATATAACCCCAACCAATACATGCAAAACCAATATAATACAA : 6575
Bipes_biporus   : GCTGGGGGGCAATAACCAAAACCAACCGGAAATAACATAGCCATCACTCAACCGCTAAATAGGGGAAATAACAGCGAGTACCAATATAACCCCAACCAATACATGCAAAACCAATATAATACAA : 6617
Anolis_carolinensis : GCTGGGGGGCAATAACCAAAACCAACCGGAAATAACATAGCCATCACTCAACCGCTAAATAGGGGAAATAACAGCGAGTACCAATATAACCCCAACCAATACATGCAAAACCAATATAATACAA : 6259
Ophisaurus_atnuatus : GCTGGGGGGCAATAACCAAAACCAACCGGAAATAACATAGCCATCACTCAACCGCTAAATAGGGGAAATAACAGCGAGTACCAATATAACCCCAACCAATACATGCAAAACCAATATAATACAA : 6218
Varanus_salvator : GCTGGGGGGCAATAACCAAAACCAACCGGAAATAACATAGCCATCACTCAACCGCTAAATAGGGGAAATAACAGCGAGTACCAATATAACCCCAACCAATACATGCAAAACCAATATAATACAA : 6627
Mertensiella_luschani : GCTGGGGGGCAATAACCAAAACCAACCGGAAATAACATAGCCATCACTCAACCGCTAAATAGGGGAAATAACAGCGAGTACCAATATAACCCCAACCAATACATGCAAAACCAATATAATACAA : 6608
Xenopus_laevis  : GCTGGGGGGCAATAACCAAAACCAACCGGAAATAACATAGCCATCACTCAACCGCTAAATAGGGGAAATAACAGCGAGTACCAATATAACCCCAACCAATACATGCAAAACCAATATAATACAA : 6599

```



```

*       7060       *       7080       *       7100       *       7120       *       7140       *       7160       *       7180
Bos_taurus      : GATTAACCTCCACCAATATATGAGCAATCCACCAACACCCCTGCTTATATAACNATGNAATANAACACCCATATAAGCCGCTCAAACCTGCGCACTCTAATCCATAGGGAGGCT 6732
Hylobates_lar  : GCTAACACACCGGATTCCTAGGCTGCACTGAAATCCAGACACACACCCCTCTATTATAGGCTTGNAAACAAATACCGTGTATAGGCCCCAATCCACCCATATACAGGGAGGCT 6741
Lemur_catta    : ACTAACTATATCTATTCTGCTGATCAACATTAACCCACACACACCACTAACTTATCAAAACATATANAACAAACCAATATACCTCTCAAACTCTCTATCTGCTATAGGGAGGCT 6738
Nycticebus_coucang : CTTAACTATCTATTCTGCTGATCAACATTAACCCACACACACCACTAACTTATCAAAACATATANAACAAACCAATATACCTCTCAAACTCTCTATCTGCTATAGGGAGGCT 6735
Tarsius_bancanus : CTTAACTATCTATTCTGCTGATCAACATTAACCCACACACACCACTAACTTATCAAAACATATANAACAAACCAATATACCTCTCAAACTCTCTATCTGCTATAGGGAGGCT 6735
Gorilla_gorilla : CTTAACTATCTATTCTGCTGATCAACATTAACCCACACACACCACTAACTTATCAAAACATATANAACAAACCAATATACCTCTCAAACTCTCTATCTGCTATAGGGAGGCT 6741
Homo_sapiens   : CTTAACTATCTATTCTGCTGATCAACATTAACCCACACACACCACTAACTTATCAAAACATATANAACAAACCAATATACCTCTCAAACTCTCTATCTGCTATAGGGAGGCT 6732
Papio_hamadryas : CTTAACTATCTATTCTGCTGATCAACATTAACCCACACACACCACTAACTTATCAAAACATATANAACAAACCAATATACCTCTCAAACTCTCTATCTGCTATAGGGAGGCT 6744
Cebus_albifrons : CTTAACTATCTATTCTGCTGATCAACATTAACCCACACACACCACTAACTTATCAAAACATATANAACAAACCAATATACCTCTCAAACTCTCTATCTGCTATAGGGAGGCT 6741
Macaca_sylvanus : CTTAACTATCTATTCTGCTGATCAACATTAACCCACACACACCACTAACTTATCAAAACATATANAACAAACCAATATACCTCTCAAACTCTCTATCTGCTATAGGGAGGCT 6738
Pongo_pygmaeus : CTTAACTATCTATTCTGCTGATCAACATTAACCCACACACACCACTAACTTATCAAAACATATANAACAAACCAATATACCTCTCAAACTCTCTATCTGCTATAGGGAGGCT 6741
Pan_paniscus   : CTTAACTATCTATTCTGCTGATCAACATTAACCCACACACACCACTAACTTATCAAAACATATANAACAAACCAATATACCTCTCAAACTCTCTATCTGCTATAGGGAGGCT 6741
Agkistrodon_piscivorus : CTTAACTATCTATTCTGCTGATCAACATTAACCCACACACACCACTAACTTATCAAAACATATANAACAAACCAATATACCTCTCAAACTCTCTATCTGCTATAGGGAGGCT 6741
Pantherophis_guttatus : GACTACACCCCGGATTCCTAGGCTGCACTGAAATCCAGACACACACCCCTCTATTATAGGCTTGNAAACAAATACCGTGTATAGGCCCCAATCCACCCATATACAGGGAGGCT 6741
Dinodon_semicarinatus : AACCCCGGCCCCAATTCTAGCTAACTCAACACATACAAATATCAATAACCAATCAAGACCTAGGAAACCGTGTGNAAACAAATACCGTGTATAGGCCCCAATCCACCCATATACAGGGAGGCT 6741
Boa_constrictor : AATCACTCAACGATTCCTAGCTAACTCAACACATACAAATATCAATAACCAATCAAGACCTAGGAAACCGTGTGNAAACAAATACCGTGTATAGGCCCCAATCCACCCATATACAGGGAGGCT 6750
Python_regius  : AATCACTCAACCCCGGATTCCTAGCTAACTCAACACATACAAATATCAATAACCAATCAAGACCTAGGAAACCGTGTGNAAACAAATACCGTGTATAGGCCCCAATCCACCCATATACAGGGAGGCT 6747
Acrochordus_granulatus : AATCACTCAACCCCGGATTCCTAGCTAACTCAACACATACAAATATCAATAACCAATCAAGACCTAGGAAACCGTGTGNAAACAAATACCGTGTATAGGCCCCAATCCACCCATATACAGGGAGGCT 6744
Cylindrophis_ruffus : AATCACTCAACCCCGGATTCCTAGCTAACTCAACACATACAAATATCAATAACCAATCAAGACCTAGGAAACCGTGTGNAAACAAATACCGTGTATAGGCCCCAATCCACCCATATACAGGGAGGCT 6714
Ovophis_okinavensis : AATCACTCAACCCCGGATTCCTAGCTAACTCAACACATACAAATATCAATAACCAATCAAGACCTAGGAAACCGTGTGNAAACAAATACCGTGTATAGGCCCCAATCCACCCATATACAGGGAGGCT 6741
Xenopeltis_unicolor : AATCACTCAACCCCGGATTCCTAGCTAACTCAACACATACAAATATCAATAACCAATCAAGACCTAGGAAACCGTGTGNAAACAAATACCGTGTATAGGCCCCAATCCACCCATATACAGGGAGGCT 6753
Typhlops_reticulatus : CTTAACTATCTATTCTGCTGATCAACATTAACCCACACACACCACTAACTTATCAAAACATATANAACAAACCAATATACCTCTCAAACTCTCTATCTGCTATAGGGAGGCT 6678
Leptotyphlops_dulcis : CTTAACTATCTATTCTGCTGATCAACATTAACCCACACACACCACTAACTTATCAAAACATATANAACAAACCAATATACCTCTCAAACTCTCTATCTGCTATAGGGAGGCT 6688
Caiman_crocodilus : AGCCCTTCGCGCCGATTCCTAGCTAACTCAACACATACAAATATCAATAACCAATCAAGACCTAGGAAACCGTGTGNAAACAAATACCGTGTATAGGCCCCAATCCACCCATATACAGGGAGGCT 6759
Alligator_sinensis : AACCCCGGCCCCAATTCTAGCTAACTCAACACATACAAATATCAATAACCAATCAAGACCTAGGAAACCGTGTGNAAACAAATACCGTGTATAGGCCCCAATCCACCCATATACAGGGAGGCT 6789
Alligator_mississippiensis : AACCCCGGCCCCAATTCTAGCTAACTCAACACATACAAATATCAATAACCAATCAAGACCTAGGAAACCGTGTGNAAACAAATACCGTGTATAGGCCCCAATCCACCCATATACAGGGAGGCT 6738
Gavialis_gangeticus : AACCCCGGCCCCAATTCTAGCTAACTCAACACATACAAATATCAATAACCAATCAAGACCTAGGAAACCGTGTGNAAACAAATACCGTGTATAGGCCCCAATCCACCCATATACAGGGAGGCT 6804
Crocodylus_moreletii : CCAATTCGCGCCGATTCCTAGCTAACTCAACACATACAAATATCAATAACCAATCAAGACCTAGGAAACCGTGTGNAAACAAATACCGTGTATAGGCCCCAATCCACCCATATACAGGGAGGCT 6780
Dogania_subplana : CTTAACTATCTATTCTGCTGATCAACATTAACCCACACACACCACTAACTTATCAAAACATATANAACAAACCAATATACCTCTCAAACTCTCTATCTGCTATAGGGAGGCT 6708
Pelomedusa_subrufa : AATCACTCAACCCCGGATTCCTAGCTAACTCAACACATACAAATATCAATAACCAATCAAGACCTAGGAAACCGTGTGNAAACAAATACCGTGTATAGGCCCCAATCCACCCATATACAGGGAGGCT 6729
Chrysemys_picta : CTTAACTATCTATTCTGCTGATCAACATTAACCCACACACACCACTAACTTATCAAAACATATANAACAAACCAATATACCTCTCAAACTCTCTATCTGCTATAGGGAGGCT 6747
Chelonia_mydas : CTTAACTATCTATTCTGCTGATCAACATTAACCCACACACACCACTAACTTATCAAAACATATANAACAAACCAATATACCTCTCAAACTCTCTATCTGCTATAGGGAGGCT 6750
Tinamus_major : CTTAACTATCTATTCTGCTGATCAACATTAACCCACACACACCACTAACTTATCAAAACATATANAACAAACCAATATACCTCTCAAACTCTCTATCTGCTATAGGGAGGCT 6726
Smithornis_sharpei : AATCACTCAACCCCGGATTCCTAGCTAACTCAACACATACAAATATCAATAACCAATCAAGACCTAGGAAACCGTGTGNAAACAAATACCGTGTATAGGCCCCAATCCACCCATATACAGGGAGGCT 6735
Corvus_frugilegus : AATCACTCAACCCCGGATTCCTAGCTAACTCAACACATACAAATATCAATAACCAATCAAGACCTAGGAAACCGTGTGNAAACAAATACCGTGTATAGGCCCCAATCCACCCATATACAGGGAGGCT 6735
Vidua_chalybeata : AATCACTCAACCCCGGATTCCTAGCTAACTCAACACATACAAATATCAATAACCAATCAAGACCTAGGAAACCGTGTGNAAACAAATACCGTGTATAGGCCCCAATCCACCCATATACAGGGAGGCT 6735
Buteo_buteo    : AATCACTCAACCCCGGATTCCTAGCTAACTCAACACATACAAATATCAATAACCAATCAAGACCTAGGAAACCGTGTGNAAACAAATACCGTGTATAGGCCCCAATCCACCCATATACAGGGAGGCT 6732
Falco_peregrinus : AATCACTCAACCCCGGATTCCTAGCTAACTCAACACATACAAATATCAATAACCAATCAAGACCTAGGAAACCGTGTGNAAACAAATACCGTGTATAGGCCCCAATCCACCCATATACAGGGAGGCT 6729
Dromaius_novaeollandiae : AATCACTCAACCCCGGATTCCTAGCTAACTCAACACATACAAATATCAATAACCAATCAAGACCTAGGAAACCGTGTGNAAACAAATACCGTGTATAGGCCCCAATCCACCCATATACAGGGAGGCT 6735
Struthio_camelus : AATCACTCAACCCCGGATTCCTAGCTAACTCAACACATACAAATATCAATAACCAATCAAGACCTAGGAAACCGTGTGNAAACAAATACCGTGTATAGGCCCCAATCCACCCATATACAGGGAGGCT 6732
Apteryx_haastii : AATCACTCAACCCCGGATTCCTAGCTAACTCAACACATACAAATATCAATAACCAATCAAGACCTAGGAAACCGTGTGNAAACAAATACCGTGTATAGGCCCCAATCCACCCATATACAGGGAGGCT 6735
Rhea_americanana : AATCACTCAACCCCGGATTCCTAGCTAACTCAACACATACAAATATCAATAACCAATCAAGACCTAGGAAACCGTGTGNAAACAAATACCGTGTATAGGCCCCAATCCACCCATATACAGGGAGGCT 6729
Gallus_gallus  : AATCACTCAACCCCGGATTCCTAGCTAACTCAACACATACAAATATCAATAACCAATCAAGACCTAGGAAACCGTGTGNAAACAAATACCGTGTATAGGCCCCAATCCACCCATATACAGGGAGGCT 6735
Ciconia_ciconia : AATCACTCAACCCCGGATTCCTAGCTAACTCAACACATACAAATATCAATAACCAATCAAGACCTAGGAAACCGTGTGNAAACAAATACCGTGTATAGGCCCCAATCCACCCATATACAGGGAGGCT 6735
Ciconia_boycinana : AATCACTCAACCCCGGATTCCTAGCTAACTCAACACATACAAATATCAATAACCAATCAAGACCTAGGAAACCGTGTGNAAACAAATACCGTGTATAGGCCCCAATCCACCCATATACAGGGAGGCT 6723
Iguana_iguana  : AATCACTCAACCCCGGATTCCTAGCTAACTCAACACATACAAATATCAATAACCAATCAAGACCTAGGAAACCGTGTGNAAACAAATACCGTGTATAGGCCCCAATCCACCCATATACAGGGAGGCT 6726
Fumeaces_egregius : AATCACTCAACCCCGGATTCCTAGCTAACTCAACACATACAAATATCAATAACCAATCAAGACCTAGGAAACCGTGTGNAAACAAATACCGTGTATAGGCCCCAATCCACCCATATACAGGGAGGCT 6726
Sphenodon_punctatus : AATCACTCAACCCCGGATTCCTAGCTAACTCAACACATACAAATATCAATAACCAATCAAGACCTAGGAAACCGTGTGNAAACAAATACCGTGTATAGGCCCCAATCCACCCATATACAGGGAGGCT 6726
Sceloporus_occidentalis : AATCACTCAACCCCGGATTCCTAGCTAACTCAACACATACAAATATCAATAACCAATCAAGACCTAGGAAACCGTGTGNAAACAAATACCGTGTATAGGCCCCAATCCACCCATATACAGGGAGGCT 6732
Cordylus_warreni : AATCACTCAACCCCGGATTCCTAGCTAACTCAACACATACAAATATCAATAACCAATCAAGACCTAGGAAACCGTGTGNAAACAAATACCGTGTATAGGCCCCAATCCACCCATATACAGGGAGGCT 6726
Abronia_graminea : AATCACTCAACCCCGGATTCCTAGCTAACTCAACACATACAAATATCAATAACCAATCAAGACCTAGGAAACCGTGTGNAAACAAATACCGTGTATAGGCCCCAATCCACCCATATACAGGGAGGCT 6714
Shinisaurus_crocodilurus : AATCACTCAACCCCGGATTCCTAGCTAACTCAACACATACAAATATCAATAACCAATCAAGACCTAGGAAACCGTGTGNAAACAAATACCGTGTATAGGCCCCAATCCACCCATATACAGGGAGGCT 6768
Varanus_komodoensis : AATCACTCAACCCCGGATTCCTAGCTAACTCAACACATACAAATATCAATAACCAATCAAGACCTAGGAAACCGTGTGNAAACAAATACCGTGTATAGGCCCCAATCCACCCATATACAGGGAGGCT 6708
Rhinurea_floridana : AATCACTCAACCCCGGATTCCTAGCTAACTCAACACATACAAATATCAATAACCAATCAAGACCTAGGAAACCGTGTGNAAACAAATACCGTGTATAGGCCCCAATCCACCCATATACAGGGAGGCT 6699
Geocalamus_acutus : AATCACTCAACCCCGGATTCCTAGCTAACTCAACACATACAAATATCAATAACCAATCAAGACCTAGGAAACCGTGTGNAAACAAATACCGTGTATAGGCCCCAATCCACCCATATACAGGGAGGCT 6708
Diplometopon_zarudnyi : AATCACTCAACCCCGGATTCCTAGCTAACTCAACACATACAAATATCAATAACCAATCAAGACCTAGGAAACCGTGTGNAAACAAATACCGTGTATAGGCCCCAATCCACCCATATACAGGGAGGCT 6708
Amphisbaena_schmidti : AATCACTCAACCCCGGATTCCTAGCTAACTCAACACATACAAATATCAATAACCAATCAAGACCTAGGAAACCGTGTGNAAACAAATACCGTGTATAGGCCCCAATCCACCCATATACAGGGAGGCT 6696
Bipes_tridactylus : AATCACTCAACCCCGGATTCCTAGCTAACTCAACACATACAAATATCAATAACCAATCAAGACCTAGGAAACCGTGTGNAAACAAATACCGTGTATAGGCCCCAATCCACCCATATACAGGGAGGCT 6708
Bipes_canaliculatus : AATCACTCAACCCCGGATTCCTAGCTAACTCAACACATACAAATATCAATAACCAATCAAGACCTAGGAAACCGTGTGNAAACAAATACCGTGTATAGGCCCCAATCCACCCATATACAGGGAGGCT 6750
Bipes_biporus  : AATCACTCAACCCCGGATTCCTAGCTAACTCAACACATACAAATATCAATAACCAATCAAGACCTAGGAAACCGTGTGNAAACAAATACCGTGTATAGGCCCCAATCCACCCATATACAGGGAGGCT 6392
Anolis_carolinensis : AATCACTCAACCCCGGATTCCTAGCTAACTCAACACATACAAATATCAATAACCAATCAAGACCTAGGAAACCGTGTGNAAACAAATACCGTGTATAGGCCCCAATCCACCCATATACAGGGAGGCT 6351
Ophisaurus_atnuatus : AATCACTCAACCCCGGATTCCTAGCTAACTCAACACATACAAATATCAATAACCAATCAAGACCTAGGAAACCGTGTGNAAACAAATACCGTGTATAGGCCCCAATCCACCCATATACAGGGAGGCT 6760
Varanus_salvator : AATCACTCAACCCCGGATTCCTAGCTAACTCAACACATACAAATATCAATAACCAATCAAGACCTAGGAAACCGTGTGNAAACAAATACCGTGTATAGGCCCCAATCCACCCATATACAGGGAGGCT 6741
Mertensiella_luschani : AATCACTCAACCCCGGATTCCTAGCTAACTCAACACATACAAATATCAATAACCAATCAAGACCTAGGAAACCGTGTGNAAACAAATACCGTGTATAGGCCCCAATCCACCCATATACAGGGAGGCT 6732
Xenopus_laevis : AATCACTCAACCCCGGATTCCTAGCTAACTCAACACATACAAATATCAATAACCAATCAAGACCTAGGAAACCGTGTGNAAACAAATACCGTGTATAGGCCCCAATCCACCCATATACAGGGAGGCT 6732

```

|                            | * | 7200 | *  | 7220 | *  | 7240 | *  | 7260 | *  | 7280 | *  | 7300 | *  |        |
|----------------------------|---|------|----|------|----|------|----|------|----|------|----|------|----|--------|
| Bos_taurus                 | : | CC   | CC | CC   | CC | CC   | CC | CC   | CC | CC   | CC | CC   | CC | : 6865 |
| Hylobates_lar              | : | CC   | CC | CC   | CC | CC   | CC | CC   | CC | CC   | CC | CC   | CC | : 6874 |
| Lemur_catta                | : | CC   | CC | CC   | CC | CC   | CC | CC   | CC | CC   | CC | CC   | CC | : 6871 |
| Nycticebus_coucang         | : | CC   | CC | CC   | CC | CC   | CC | CC   | CC | CC   | CC | CC   | CC | : 6868 |
| Tarsius_bancanus           | : | CC   | CC | CC   | CC | CC   | CC | CC   | CC | CC   | CC | CC   | CC | : 6868 |
| Gorilla_gorilla            | : | CC   | CC | CC   | CC | CC   | CC | CC   | CC | CC   | CC | CC   | CC | : 6874 |
| Homo_sapiens               | : | CC   | CC | CC   | CC | CC   | CC | CC   | CC | CC   | CC | CC   | CC | : 6865 |
| Papio_hamadryas            | : | CC   | CC | CC   | CC | CC   | CC | CC   | CC | CC   | CC | CC   | CC | : 6877 |
| Cebus_albifrons            | : | CC   | CC | CC   | CC | CC   | CC | CC   | CC | CC   | CC | CC   | CC | : 6874 |
| Macaca_sylvanus            | : | CC   | CC | CC   | CC | CC   | CC | CC   | CC | CC   | CC | CC   | CC | : 6871 |
| Pongo_pygmaeus             | : | CC   | CC | CC   | CC | CC   | CC | CC   | CC | CC   | CC | CC   | CC | : 6874 |
| Pan_paniscus               | : | CC   | CC | CC   | CC | CC   | CC | CC   | CC | CC   | CC | CC   | CC | : 6874 |
| Agkistrodon_piscivorus     | : | CC   | CC | CC   | CC | CC   | CC | CC   | CC | CC   | CC | CC   | CC | : 6874 |
| Pantherophis_guttatus      | : | CC   | CC | CC   | CC | CC   | CC | CC   | CC | CC   | CC | CC   | CC | : 6874 |
| Dinodon_semicarinatus      | : | CC   | CC | CC   | CC | CC   | CC | CC   | CC | CC   | CC | CC   | CC | : 6874 |
| Boa_constrictor            | : | CC   | CC | CC   | CC | CC   | CC | CC   | CC | CC   | CC | CC   | CC | : 6883 |
| Python_regius              | : | CC   | CC | CC   | CC | CC   | CC | CC   | CC | CC   | CC | CC   | CC | : 6880 |
| Acrochordus_granulatus     | : | CC   | CC | CC   | CC | CC   | CC | CC   | CC | CC   | CC | CC   | CC | : 6877 |
| Cylindrophis_ruffus        | : | CC   | CC | CC   | CC | CC   | CC | CC   | CC | CC   | CC | CC   | CC | : 6847 |
| Ovophis_okinavensis        | : | CC   | CC | CC   | CC | CC   | CC | CC   | CC | CC   | CC | CC   | CC | : 6874 |
| Xenopeltis_unicolor        | : | CC   | CC | CC   | CC | CC   | CC | CC   | CC | CC   | CC | CC   | CC | : 6886 |
| Typhlops_reticulatus       | : | CC   | CC | CC   | CC | CC   | CC | CC   | CC | CC   | CC | CC   | CC | : 6811 |
| Leptotyphlops_dulcis       | : | CC   | CC | CC   | CC | CC   | CC | CC   | CC | CC   | CC | CC   | CC | : 6821 |
| Caiman_crocodilus          | : | CC   | CC | CC   | CC | CC   | CC | CC   | CC | CC   | CC | CC   | CC | : 6892 |
| Alligator_sinensis         | : | CC   | CC | CC   | CC | CC   | CC | CC   | CC | CC   | CC | CC   | CC | : 6922 |
| Alligator_mississippiensis | : | CC   | CC | CC   | CC | CC   | CC | CC   | CC | CC   | CC | CC   | CC | : 6871 |
| Gavialis_gangeticus        | : | CC   | CC | CC   | CC | CC   | CC | CC   | CC | CC   | CC | CC   | CC | : 6937 |
| Crocodylus_moreletii       | : | CC   | CC | CC   | CC | CC   | CC | CC   | CC | CC   | CC | CC   | CC | : 6913 |
| Dogania_subplana           | : | CC   | CC | CC   | CC | CC   | CC | CC   | CC | CC   | CC | CC   | CC | : 6838 |
| Pelomedusa_subrufa         | : | CC   | CC | CC   | CC | CC   | CC | CC   | CC | CC   | CC | CC   | CC | : 6862 |
| Chrysemys_picta            | : | CC   | CC | CC   | CC | CC   | CC | CC   | CC | CC   | CC | CC   | CC | : 6880 |
| Chelonia_mydas             | : | CC   | CC | CC   | CC | CC   | CC | CC   | CC | CC   | CC | CC   | CC | : 6883 |
| Tinanus_major              | : | CC   | CC | CC   | CC | CC   | CC | CC   | CC | CC   | CC | CC   | CC | : 6859 |
| Smithornis_sharpei         | : | CC   | CC | CC   | CC | CC   | CC | CC   | CC | CC   | CC | CC   | CC | : 6868 |
| Corvus_frugilegus          | : | CC   | CC | CC   | CC | CC   | CC | CC   | CC | CC   | CC | CC   | CC | : 6868 |
| Vidua_chalybeata           | : | CC   | CC | CC   | CC | CC   | CC | CC   | CC | CC   | CC | CC   | CC | : 6868 |
| Buteo_buteo                | : | CC   | CC | CC   | CC | CC   | CC | CC   | CC | CC   | CC | CC   | CC | : 6865 |
| Falco_peregrinus           | : | CC   | CC | CC   | CC | CC   | CC | CC   | CC | CC   | CC | CC   | CC | : 6862 |
| Dromaius_novaeollandiae    | : | CC   | CC | CC   | CC | CC   | CC | CC   | CC | CC   | CC | CC   | CC | : 6868 |
| Struthio_camelus           | : | CC   | CC | CC   | CC | CC   | CC | CC   | CC | CC   | CC | CC   | CC | : 6865 |
| Apteryx_haastii            | : | CC   | CC | CC   | CC | CC   | CC | CC   | CC | CC   | CC | CC   | CC | : 6868 |
| Rhea_american              | : | CC   | CC | CC   | CC | CC   | CC | CC   | CC | CC   | CC | CC   | CC | : 6862 |
| Gallus_gallus              | : | CC   | CC | CC   | CC | CC   | CC | CC   | CC | CC   | CC | CC   | CC | : 6868 |
| Ciconia_ciconia            | : | CC   | CC | CC   | CC | CC   | CC | CC   | CC | CC   | CC | CC   | CC | : 6868 |
| Ciconia_boyciana           | : | CC   | CC | CC   | CC | CC   | CC | CC   | CC | CC   | CC | CC   | CC | : 6868 |
| Iguana_iguana              | : | CC   | CC | CC   | CC | CC   | CC | CC   | CC | CC   | CC | CC   | CC | : 6856 |
| Eumeces_egregius           | : | CC   | CC | CC   | CC | CC   | CC | CC   | CC | CC   | CC | CC   | CC | : 6859 |
| Sphenodon_punctatus        | : | CC   | CC | CC   | CC | CC   | CC | CC   | CC | CC   | CC | CC   | CC | : 6859 |
| Sceloporus_occidentalis    | : | CC   | CC | CC   | CC | CC   | CC | CC   | CC | CC   | CC | CC   | CC | : 6859 |
| Cordylus_warreni           | : | CC   | CC | CC   | CC | CC   | CC | CC   | CC | CC   | CC | CC   | CC | : 6865 |
| Abronia_graminea           | : | CC   | CC | CC   | CC | CC   | CC | CC   | CC | CC   | CC | CC   | CC | : 6859 |
| Shinisaurus_crocodilurus   | : | CC   | CC | CC   | CC | CC   | CC | CC   | CC | CC   | CC | CC   | CC | : 6901 |
| Varanus_komodoensis        | : | CC   | CC | CC   | CC | CC   | CC | CC   | CC | CC   | CC | CC   | CC | : 6841 |
| Rhineura_floridana         | : | CC   | CC | CC   | CC | CC   | CC | CC   | CC | CC   | CC | CC   | CC | : 6832 |
| Geocalamus_acutus          | : | CC   | CC | CC   | CC | CC   | CC | CC   | CC | CC   | CC | CC   | CC | : 6841 |
| Diplometopon_zarudnyi      | : | CC   | CC | CC   | CC | CC   | CC | CC   | CC | CC   | CC | CC   | CC | : 6841 |
| Amphisbaena_schmidti       | : | CC   | CC | CC   | CC | CC   | CC | CC   | CC | CC   | CC | CC   | CC | : 6829 |
| Bipes_tridactylus          | : | CC   | CC | CC   | CC | CC   | CC | CC   | CC | CC   | CC | CC   | CC | : 6841 |
| Bipes_canaliculatus        | : | CC   | CC | CC   | CC | CC   | CC | CC   | CC | CC   | CC | CC   | CC | : 6883 |
| Bipes_biporus              | : | CC   | CC | CC   | CC | CC   | CC | CC   | CC | CC   | CC | CC   | CC | : 6525 |
| Anolis_carolinensis        | : | CC   | CC | CC   | CC | CC   | CC | CC   | CC | CC   | CC | CC   | CC | : 6484 |
| Ophisaurus_attenuatus      | : | CC   | CC | CC   | CC | CC   | CC | CC   | CC | CC   | CC | CC   | CC | : 6893 |
| Varanus_salvator           | : | CC   | CC | CC   | CC | CC   | CC | CC   | CC | CC   | CC | CC   | CC | : 6874 |
| Mertensiella_luschani      | : | CC   | CC | CC   | CC | CC   | CC | CC   | CC | CC   | CC | CC   | CC | : 6865 |
| Xenopus_laevis             | : | CC   | CC | CC   | CC | CC   | CC | CC   | CC | CC   | CC | CC   | CC | : 6865 |

|                            | 7320 | *        | 7340     | *      | 7360     | *      | 7380  | *     | 7400   | *      | 7420 | *     | 7440  |        |     |    |        |    |     |   |      |
|----------------------------|------|----------|----------|--------|----------|--------|-------|-------|--------|--------|------|-------|-------|--------|-----|----|--------|----|-----|---|------|
| Bos_taurus                 | :    | ATCCACAC | TAACAAAT | ATGTCG | CCACAAAC | AAAT   | AAAAA | AAAAA | GCAGAT | TTCCCG | TA   | GAANA | AAAAA | AAACCT | TTG | CC | AAACAA | TG | GGT | : | 6989 |
| Hylobates_lar              | :    | CCCTCCAA | CAAGCT   | GTTC   | CCCAAT   | CCAAAC | AAAG  | AAAAA | TAAAG  | GAAG   | TTTG | AAAC  | AAAAA | CCCAAT | TA  | CC | CCCAAT | TA | GGC | : | 6998 |
| Lemur_catta                | :    | CCCTCCAA | CAAGCT   | GTTC   | CCCAAT   | CCAAAC | AAAG  | AAAAA | TAAAG  | GAAG   | TTTG | AAAC  | AAAAA | CCCAAT | TA  | CC | CCCAAT | TA | GGC | : | 6995 |
| Nycticebus_coucang         | :    | CCCTCCAA | CAAGCT   | GTTC   | CCCAAT   | CCAAAC | AAAG  | AAAAA | TAAAG  | GAAG   | TTTG | AAAC  | AAAAA | CCCAAT | TA  | CC | CCCAAT | TA | GGC | : | 6992 |
| Tarsius_bancanus           | :    | CCCTCCAA | CAAGCT   | GTTC   | CCCAAT   | CCAAAC | AAAG  | AAAAA | TAAAG  | GAAG   | TTTG | AAAC  | AAAAA | CCCAAT | TA  | CC | CCCAAT | TA | GGC | : | 6992 |
| Gorilla_gorilla            | :    | CCCTCCAA | CAAGCT   | GTTC   | CCCAAT   | CCAAAC | AAAG  | AAAAA | TAAAG  | GAAG   | TTTG | AAAC  | AAAAA | CCCAAT | TA  | CC | CCCAAT | TA | GGC | : | 6998 |
| Homo_sapiens               | :    | CCCTCCAA | CAAGCT   | GTTC   | CCCAAT   | CCAAAC | AAAG  | AAAAA | TAAAG  | GAAG   | TTTG | AAAC  | AAAAA | CCCAAT | TA  | CC | CCCAAT | TA | GGC | : | 6989 |
| Papio_hamadryas            | :    | CCCTCCAA | CAAGCT   | GTTC   | CCCAAT   | CCAAAC | AAAG  | AAAAA | TAAAG  | GAAG   | TTTG | AAAC  | AAAAA | CCCAAT | TA  | CC | CCCAAT | TA | GGC | : | 7001 |
| Cebus_albifrons            | :    | CCCTCCAA | CAAGCT   | GTTC   | CCCAAT   | CCAAAC | AAAG  | AAAAA | TAAAG  | GAAG   | TTTG | AAAC  | AAAAA | CCCAAT | TA  | CC | CCCAAT | TA | GGC | : | 6998 |
| Macaca_sylvanus            | :    | CCCTCCAA | CAAGCT   | GTTC   | CCCAAT   | CCAAAC | AAAG  | AAAAA | TAAAG  | GAAG   | TTTG | AAAC  | AAAAA | CCCAAT | TA  | CC | CCCAAT | TA | GGC | : | 6995 |
| Pongo_pygmaeus             | :    | CCCTCCAA | CAAGCT   | GTTC   | CCCAAT   | CCAAAC | AAAG  | AAAAA | TAAAG  | GAAG   | TTTG | AAAC  | AAAAA | CCCAAT | TA  | CC | CCCAAT | TA | GGC | : | 6998 |
| Pan_paniscus               | :    | CCCTCCAA | CAAGCT   | GTTC   | CCCAAT   | CCAAAC | AAAG  | AAAAA | TAAAG  | GAAG   | TTTG | AAAC  | AAAAA | CCCAAT | TA  | CC | CCCAAT | TA | GGC | : | 6998 |
| Agkistrodon_piscivorus     | :    | CCCTCCAA | CAAGCT   | GTTC   | CCCAAT   | CCAAAC | AAAG  | AAAAA | TAAAG  | GAAG   | TTTG | AAAC  | AAAAA | CCCAAT | TA  | CC | CCCAAT | TA | GGC | : | 6998 |
| Pantherophis_guttatus      | :    | CCCTCCAA | CAAGCT   | GTTC   | CCCAAT   | CCAAAC | AAAG  | AAAAA | TAAAG  | GAAG   | TTTG | AAAC  | AAAAA | CCCAAT | TA  | CC | CCCAAT | TA | GGC | : | 6998 |
| Dinodon_semicarinatus      | :    | CCCTCCAA | CAAGCT   | GTTC   | CCCAAT   | CCAAAC | AAAG  | AAAAA | TAAAG  | GAAG   | TTTG | AAAC  | AAAAA | CCCAAT | TA  | CC | CCCAAT | TA | GGC | : | 6998 |
| Boa_constrictor            | :    | CCCTCCAA | CAAGCT   | GTTC   | CCCAAT   | CCAAAC | AAAG  | AAAAA | TAAAG  | GAAG   | TTTG | AAAC  | AAAAA | CCCAAT | TA  | CC | CCCAAT | TA | GGC | : | 7007 |
| Python_regius              | :    | CCCTCCAA | CAAGCT   | GTTC   | CCCAAT   | CCAAAC | AAAG  | AAAAA | TAAAG  | GAAG   | TTTG | AAAC  | AAAAA | CCCAAT | TA  | CC | CCCAAT | TA | GGC | : | 7004 |
| Acrochordus_granulatus     | :    | CCCTCCAA | CAAGCT   | GTTC   | CCCAAT   | CCAAAC | AAAG  | AAAAA | TAAAG  | GAAG   | TTTG | AAAC  | AAAAA | CCCAAT | TA  | CC | CCCAAT | TA | GGC | : | 7001 |
| Lacindorphis_ruffus        | :    | CCCTCCAA | CAAGCT   | GTTC   | CCCAAT   | CCAAAC | AAAG  | AAAAA | TAAAG  | GAAG   | TTTG | AAAC  | AAAAA | CCCAAT | TA  | CC | CCCAAT | TA | GGC | : | 6971 |
| Ovophis_okinavensis        | :    | CCCTCCAA | CAAGCT   | GTTC   | CCCAAT   | CCAAAC | AAAG  | AAAAA | TAAAG  | GAAG   | TTTG | AAAC  | AAAAA | CCCAAT | TA  | CC | CCCAAT | TA | GGC | : | 6998 |
| Xenopeltis_unicolor        | :    | CCCTCCAA | CAAGCT   | GTTC   | CCCAAT   | CCAAAC | AAAG  | AAAAA | TAAAG  | GAAG   | TTTG | AAAC  | AAAAA | CCCAAT | TA  | CC | CCCAAT | TA | GGC | : | 7010 |
| Typhlops_reticulatus       | :    | CCCTCCAA | CAAGCT   | GTTC   | CCCAAT   | CCAAAC | AAAG  | AAAAA | TAAAG  | GAAG   | TTTG | AAAC  | AAAAA | CCCAAT | TA  | CC | CCCAAT | TA | GGC | : | 6935 |
| Leptotyphlops_dulcis       | :    | CCCTCCAA | CAAGCT   | GTTC   | CCCAAT   | CCAAAC | AAAG  | AAAAA | TAAAG  | GAAG   | TTTG | AAAC  | AAAAA | CCCAAT | TA  | CC | CCCAAT | TA | GGC | : | 6945 |
| Caiman_crocodilus          | :    | CCCTCCAA | CAAGCT   | GTTC   | CCCAAT   | CCAAAC | AAAG  | AAAAA | TAAAG  | GAAG   | TTTG | AAAC  | AAAAA | CCCAAT | TA  | CC | CCCAAT | TA | GGC | : | 7016 |
| Alligator_sinensis         | :    | CCCTCCAA | CAAGCT   | GTTC   | CCCAAT   | CCAAAC | AAAG  | AAAAA | TAAAG  | GAAG   | TTTG | AAAC  | AAAAA | CCCAAT | TA  | CC | CCCAAT | TA | GGC | : | 7046 |
| Alligator_mississippiensis | :    | CCCTCCAA | CAAGCT   | GTTC   | CCCAAT   | CCAAAC | AAAG  | AAAAA | TAAAG  | GAAG   | TTTG | AAAC  | AAAAA | CCCAAT | TA  | CC | CCCAAT | TA | GGC | : | 6995 |
| Gavialis_gangeticus        | :    | CCCTCCAA | CAAGCT   | GTTC   | CCCAAT   | CCAAAC | AAAG  | AAAAA | TAAAG  | GAAG   | TTTG | AAAC  | AAAAA | CCCAAT | TA  | CC | CCCAAT | TA | GGC | : | 7061 |
| Crocodylus_moreletii       | :    | CCCTCCAA | CAAGCT   | GTTC   | CCCAAT   | CCAAAC | AAAG  | AAAAA | TAAAG  | GAAG   | TTTG | AAAC  | AAAAA | CCCAAT | TA  | CC | CCCAAT | TA | GGC | : | 7037 |
| Dogania_subplana           | :    | CCCTCCAA | CAAGCT   | GTTC   | CCCAAT   | CCAAAC | AAAG  | AAAAA | TAAAG  | GAAG   | TTTG | AAAC  | AAAAA | CCCAAT | TA  | CC | CCCAAT | TA | GGC | : | 6959 |
| Pelomedusa_subrufa         | :    | CCCTCCAA | CAAGCT   | GTTC   | CCCAAT   | CCAAAC | AAAG  | AAAAA | TAAAG  | GAAG   | TTTG | AAAC  | AAAAA | CCCAAT | TA  | CC | CCCAAT | TA | GGC | : | 6983 |
| Chrysemys_picta            | :    | CCCTCCAA | CAAGCT   | GTTC   | CCCAAT   | CCAAAC | AAAG  | AAAAA | TAAAG  | GAAG   | TTTG | AAAC  | AAAAA | CCCAAT | TA  | CC | CCCAAT | TA | GGC | : | 7001 |
| Chelonia_mydas             | :    | CCCTCCAA | CAAGCT   | GTTC   | CCCAAT   | CCAAAC | AAAG  | AAAAA | TAAAG  | GAAG   | TTTG | AAAC  | AAAAA | CCCAAT | TA  | CC | CCCAAT | TA | GGC | : | 7004 |
| Tinamus_major              | :    | CCCTCCAA | CAAGCT   | GTTC   | CCCAAT   | CCAAAC | AAAG  | AAAAA | TAAAG  | GAAG   | TTTG | AAAC  | AAAAA | CCCAAT | TA  | CC | CCCAAT | TA | GGC | : | 6980 |
| Smithornis_sharpei         | :    | CCCTCCAA | CAAGCT   | GTTC   | CCCAAT   | CCAAAC | AAAG  | AAAAA | TAAAG  | GAAG   | TTTG | AAAC  | AAAAA | CCCAAT | TA  | CC | CCCAAT | TA | GGC | : | 6989 |
| Corvus_frugilegus          | :    | CCCTCCAA | CAAGCT   | GTTC   | CCCAAT   | CCAAAC | AAAG  | AAAAA | TAAAG  | GAAG   | TTTG | AAAC  | AAAAA | CCCAAT | TA  | CC | CCCAAT | TA | GGC | : | 6989 |
| Vidua_chalybeata           | :    | CCCTCCAA | CAAGCT   | GTTC   | CCCAAT   | CCAAAC | AAAG  | AAAAA | TAAAG  | GAAG   | TTTG | AAAC  | AAAAA | CCCAAT | TA  | CC | CCCAAT | TA | GGC | : | 6989 |
| Buteo_buteo                | :    | CCCTCCAA | CAAGCT   | GTTC   | CCCAAT   | CCAAAC | AAAG  | AAAAA | TAAAG  | GAAG   | TTTG | AAAC  | AAAAA | CCCAAT | TA  | CC | CCCAAT | TA | GGC | : | 6989 |
| Falco_peregrinus           | :    | CCCTCCAA | CAAGCT   | GTTC   | CCCAAT   | CCAAAC | AAAG  | AAAAA | TAAAG  | GAAG   | TTTG | AAAC  | AAAAA | CCCAAT | TA  | CC | CCCAAT | TA | GGC | : | 6986 |
| Dromaius_novaeollandiae    | :    | CCCTCCAA | CAAGCT   | GTTC   | CCCAAT   | CCAAAC | AAAG  | AAAAA | TAAAG  | GAAG   | TTTG | AAAC  | AAAAA | CCCAAT | TA  | CC | CCCAAT | TA | GGC | : | 6983 |
| Struthio_camelus           | :    | CCCTCCAA | CAAGCT   | GTTC   | CCCAAT   | CCAAAC | AAAG  | AAAAA | TAAAG  | GAAG   | TTTG | AAAC  | AAAAA | CCCAAT | TA  | CC | CCCAAT | TA | GGC | : | 6989 |
| Apteryx_haastii            | :    | CCCTCCAA | CAAGCT   | GTTC   | CCCAAT   | CCAAAC | AAAG  | AAAAA | TAAAG  | GAAG   | TTTG | AAAC  | AAAAA | CCCAAT | TA  | CC | CCCAAT | TA | GGC | : | 6986 |
| Rhea_american              | :    | CCCTCCAA | CAAGCT   | GTTC   | CCCAAT   | CCAAAC | AAAG  | AAAAA | TAAAG  | GAAG   | TTTG | AAAC  | AAAAA | CCCAAT | TA  | CC | CCCAAT | TA | GGC | : | 6989 |
| Gallus_gallus              | :    | CCCTCCAA | CAAGCT   | GTTC   | CCCAAT   | CCAAAC | AAAG  | AAAAA | TAAAG  | GAAG   | TTTG | AAAC  | AAAAA | CCCAAT | TA  | CC | CCCAAT | TA | GGC | : | 6983 |
| Ciconia_ciconia            | :    | CCCTCCAA | CAAGCT   | GTTC   | CCCAAT   | CCAAAC | AAAG  | AAAAA | TAAAG  | GAAG   | TTTG | AAAC  | AAAAA | CCCAAT | TA  | CC | CCCAAT | TA | GGC | : | 6989 |
| Ciconia_boycciana          | :    | CCCTCCAA | CAAGCT   | GTTC   | CCCAAT   | CCAAAC | AAAG  | AAAAA | TAAAG  | GAAG   | TTTG | AAAC  | AAAAA | CCCAAT | TA  | CC | CCCAAT | TA | GGC | : | 6989 |
| Iguana_iguana              | :    | CCCTCCAA | CAAGCT   | GTTC   | CCCAAT   | CCAAAC | AAAG  | AAAAA | TAAAG  | GAAG   | TTTG | AAAC  | AAAAA | CCCAAT | TA  | CC | CCCAAT | TA | GGC | : | 6980 |
| Fumeces_egregius           | :    | CCCTCCAA | CAAGCT   | GTTC   | CCCAAT   | CCAAAC | AAAG  | AAAAA | TAAAG  | GAAG   | TTTG | AAAC  | AAAAA | CCCAAT | TA  | CC | CCCAAT | TA | GGC | : | 6983 |
| Sphenodon_punctatus        | :    | CCCTCCAA | CAAGCT   | GTTC   | CCCAAT   | CCAAAC | AAAG  | AAAAA | TAAAG  | GAAG   | TTTG | AAAC  | AAAAA | CCCAAT | TA  | CC | CCCAAT | TA | GGC | : | 6980 |
| Sceloporus_occidentalis    | :    | CCCTCCAA | CAAGCT   | GTTC   | CCCAAT   | CCAAAC | AAAG  | AAAAA | TAAAG  | GAAG   | TTTG | AAAC  | AAAAA | CCCAAT | TA  | CC | CCCAAT | TA | GGC | : | 6983 |
| Cordylus_warreni           | :    | CCCTCCAA | CAAGCT   | GTTC   | CCCAAT   | CCAAAC | AAAG  | AAAAA | TAAAG  | GAAG   | TTTG | AAAC  | AAAAA | CCCAAT | TA  | CC | CCCAAT | TA | GGC | : | 6986 |
| Abronia_graminea           | :    | CCCTCCAA | CAAGCT   | GTTC   | CCCAAT   | CCAAAC | AAAG  | AAAAA | TAAAG  | GAAG   | TTTG | AAAC  | AAAAA | CCCAAT | TA  | CC | CCCAAT | TA | GGC | : | 6983 |
| Shinisaurus_crocodilurus   | :    | CCCTCCAA | CAAGCT   | GTTC   | CCCAAT   | CCAAAC | AAAG  | AAAAA | TAAAG  | GAAG   | TTTG | AAAC  | AAAAA | CCCAAT | TA  | CC | CCCAAT | TA | GGC | : | 6971 |
| Varanus_komodoensis        | :    | CCCTCCAA | CAAGCT   | GTTC   | CCCAAT   | CCAAAC | AAAG  | AAAAA | TAAAG  | GAAG   | TTTG | AAAC  | AAAAA | CCCAAT | TA  | CC | CCCAAT | TA | GGC | : | 7025 |
| Rhineura_floridana         | :    | CCCTCCAA | CAAGCT   | GTTC   | CCCAAT   | CCAAAC | AAAG  | AAAAA | TAAAG  | GAAG   | TTTG | AAAC  | AAAAA | CCCAAT | TA  | CC | CCCAAT | TA | GGC | : | 6965 |
| Geocalamus_acutus          | :    | CCCTCCAA | CAAGCT   | GTTC   | CCCAAT   | CCAAAC | AAAG  | AAAAA | TAAAG  | GAAG   | TTTG | AAAC  | AAAAA | CCCAAT | TA  | CC | CCCAAT | TA | GGC | : | 6966 |
| Diplometopon_zarudnyi      | :    | CCCTCCAA | CAAGCT   | GTTC   | CCCAAT   | CCAAAC | AAAG  | AAAAA | TAAAG  | GAAG   | TTTG | AAAC  | AAAAA | CCCAAT | TA  | CC | CCCAAT | TA | GGC | : | 6965 |
| Amphisbaena_schmidti       | :    | CCCTCCAA | CAAGCT   | GTTC   | CCCAAT   | CCAAAC | AAAG  | AAAAA | TAAAG  | GAAG   | TTTG | AAAC  | AAAAA | CCCAAT | TA  | CC | CCCAAT | TA | GGC | : | 6965 |
| Bipes_tridactylus          | :    | CCCTCCAA | CAAGCT   | GTTC   | CCCAAT   | CCAAAC | AAAG  | AAAAA | TAAAG  | GAAG   | TTTG | AAAC  | AAAAA | CCCAAT | TA  | CC | CCCAAT | TA | GGC | : | 6953 |
| Bipes_canaliculatus        | :    | CCCTCCAA | CAAGCT   | GTTC   | CCCAAT   | CCAAAC | AAAG  | AAAAA | TAAAG  | GAAG   | TTTG | AAAC  | AAAAA | CCCAAT | TA  | CC | CCCAAT | TA | GGC | : | 6965 |
| Bipes_biporus              | :    | CCCTCCAA | CAAGCT   | GTTC   | CCCAAT   | CCAAAC | AAAG  | AAAAA | TAAAG  | GAAG   | TTTG | AAAC  | AAAAA | CCCAAT | TA  | CC | CCCAAT | TA | GGC | : | 7007 |
| Anolis_carolinensis        | :    | CCCTCCAA | CAAGCT   | GTTC   | CCCAAT   | CCAAAC | AAAG  | AAAAA | TAAAG  | GAAG   | TTTG | AAAC  | AAAAA | CCCAAT | TA  | CC | CCCAAT | TA | GGC | : | 6649 |
| Ophisaurus_ attenuatus     | :    | CCCTCCAA | CAAGCT   | GTTC   | CCCAAT   | CCAAAC | AAAG  | AAAAA | TAAAG  | GAAG   | TTTG | AAAC  | AAAAA | CCCAAT | TA  | CC | CCCAAT | TA | GGC | : | 6606 |
| Varanus_salvator           | :    | CCCTCCAA | CAAGCT   | GTTC   | CCCAAT   | CCAAAC | AAAG  | AAAAA | TAAAG  | GAAG   | TTTG | AAAC  | AAAAA | CCCAAT | TA  | CC | CCCAAT | TA | GGC | : | 7017 |
| Mertensiella_luschani      | :    | CCCTCCAA | CAAGCT   | GTTC   | CCCAAT   | CCAAAC | AAAG  | AAAAA | TAAAG  | GAAG   | TTTG | AAAC  | AAAAA | CCCAAT | TA  | CC | CCCAAT | TA | GGC | : | 6995 |
| Xenopus_laevis             | :    | CCCTCCAA | CAAGCT   | GTTC   | CCCAAT   | CCAAAC | AAAG  | AAAAA | TAAAG  | GAAG   | TTTG | AAAC  | AAAAA | CCCAAT | TA  | CC | CCCAAT | TA | GGC | : | 6989 |

|                            | * | 7460               | *          | 7480 | * | 7500 | * | 7520             | *                      | 7540                 | *                      | 7560 | * | 7580 |      |
|----------------------------|---|--------------------|------------|------|---|------|---|------------------|------------------------|----------------------|------------------------|------|---|------|------|
| Bos_taurus                 | : | GCCAAATACATACAGG   | GTAGAA     |      |   |      |   | AATAAATTAATAG    | CGCCCTCGGACAAATTTTACAG | AGCCACCCCTAAAG       | GAATCAAGCCATTCGACT     |      |   |      | 7083 |
| Hylobates_lar              | : | CCCAATACATACAGG    | CCCAACCCCA |      |   |      |   | AGANATGGGATTA    | GGCCATATAATTAATACAG    | CCCTAGCCCTACTACTAA   | GAATCAATTAATTCATTCGACT |      |   |      | 7092 |
| Lemur_catta                | : | ACCAGCCCTACATACAGG | CCCAACCCCA |      |   |      |   | AGANATGGGATTA    | GGCCATATAATTAATACAG    | CCCTAGCCCTACTACTAA   | GAATCAATTAATTCATTCGACT |      |   |      | 7089 |
| Nycticebus_coucang         | : | CCCAATACATACAGG    | CCCAACCCCA |      |   |      |   | ATAAATACATAAATTA | ATAAATACATAAATTAATTA   | ATAAATACATAAATTAATTA | ATAAATACATAAATTAATTA   |      |   |      | 7086 |
| Tarsius_bancanus           | : | CCCAATACATACAGG    | CCCAACCCCA |      |   |      |   | ATAAATACATAAATTA | ATAAATACATAAATTAATTA   | ATAAATACATAAATTAATTA | ATAAATACATAAATTAATTA   |      |   |      | 7086 |
| Gorilla_gorilla            | : | CCCAATACATACAGG    | CCCAACCCCA |      |   |      |   | ATAAATACATAAATTA | ATAAATACATAAATTAATTA   | ATAAATACATAAATTAATTA | ATAAATACATAAATTAATTA   |      |   |      | 7092 |
| Homo_sapiens               | : | CCCAATACATACAGG    | CCCAACCCCA |      |   |      |   | ATAAATACATAAATTA | ATAAATACATAAATTAATTA   | ATAAATACATAAATTAATTA | ATAAATACATAAATTAATTA   |      |   |      | 7083 |
| Papio_hamadryas            | : | CCCAATACATACAGG    | CCCAACCCCA |      |   |      |   | ATAAATACATAAATTA | ATAAATACATAAATTAATTA   | ATAAATACATAAATTAATTA | ATAAATACATAAATTAATTA   |      |   |      | 7095 |
| Cebus_albifrons            | : | CCCAATACATACAGG    | CCCAACCCCA |      |   |      |   | ATAAATACATAAATTA | ATAAATACATAAATTAATTA   | ATAAATACATAAATTAATTA | ATAAATACATAAATTAATTA   |      |   |      | 7089 |
| Macaca_sylvanus            | : | CCCAATACATACAGG    | CCCAACCCCA |      |   |      |   | ATAAATACATAAATTA | ATAAATACATAAATTAATTA   | ATAAATACATAAATTAATTA | ATAAATACATAAATTAATTA   |      |   |      | 7089 |
| Pongo_pygmaeus             | : | CCCAATACATACAGG    | CCCAACCCCA |      |   |      |   | ATAAATACATAAATTA | ATAAATACATAAATTAATTA   | ATAAATACATAAATTAATTA | ATAAATACATAAATTAATTA   |      |   |      | 7092 |
| Pan_paniscus               | : | CCCAATACATACAGG    | CCCAACCCCA |      |   |      |   | ATAAATACATAAATTA | ATAAATACATAAATTAATTA   | ATAAATACATAAATTAATTA | ATAAATACATAAATTAATTA   |      |   |      | 7092 |
| Agkistrodon_piscivorus     | : | CCCAATACATACAGG    | CCCAACCCCA |      |   |      |   | ATAAATACATAAATTA | ATAAATACATAAATTAATTA   | ATAAATACATAAATTAATTA | ATAAATACATAAATTAATTA   |      |   |      | 7080 |
| Pantherophis_guttatus      | : | CCCAATACATACAGG    | CCCAACCCCA |      |   |      |   | ATAAATACATAAATTA | ATAAATACATAAATTAATTA   | ATAAATACATAAATTAATTA | ATAAATACATAAATTAATTA   |      |   |      | 7080 |
| Dinodon_semicarinatus      | : | CCCAATACATACAGG    | CCCAACCCCA |      |   |      |   | ATAAATACATAAATTA | ATAAATACATAAATTAATTA   | ATAAATACATAAATTAATTA | ATAAATACATAAATTAATTA   |      |   |      | 7080 |
| Boa_constrictor            | : | CCCAATACATACAGG    | CCCAACCCCA |      |   |      |   | ATAAATACATAAATTA | ATAAATACATAAATTAATTA   | ATAAATACATAAATTAATTA | ATAAATACATAAATTAATTA   |      |   |      | 7089 |
| Python_regius              | : | CCCAATACATACAGG    | CCCAACCCCA |      |   |      |   | ATAAATACATAAATTA | ATAAATACATAAATTAATTA   | ATAAATACATAAATTAATTA | ATAAATACATAAATTAATTA   |      |   |      | 7086 |
| Acrochordus_granulatus     | : | CCCAATACATACAGG    | CCCAACCCCA |      |   |      |   | ATAAATACATAAATTA | ATAAATACATAAATTAATTA   | ATAAATACATAAATTAATTA | ATAAATACATAAATTAATTA   |      |   |      | 7083 |
| Cylindrophis_ruffus        | : | CCCAATACATACAGG    | CCCAACCCCA |      |   |      |   | ATAAATACATAAATTA | ATAAATACATAAATTAATTA   | ATAAATACATAAATTAATTA | ATAAATACATAAATTAATTA   |      |   |      | 7053 |
| Ovophis_okinavensis        | : | CCCAATACATACAGG    | CCCAACCCCA |      |   |      |   | ATAAATACATAAATTA | ATAAATACATAAATTAATTA   | ATAAATACATAAATTAATTA | ATAAATACATAAATTAATTA   |      |   |      | 7080 |
| Xenopeltis_unicolor        | : | CCCAATACATACAGG    | CCCAACCCCA |      |   |      |   | ATAAATACATAAATTA | ATAAATACATAAATTAATTA   | ATAAATACATAAATTAATTA | ATAAATACATAAATTAATTA   |      |   |      | 7092 |
| Typhlops_reticulatus       | : | CCCAATACATACAGG    | CCCAACCCCA |      |   |      |   | ATAAATACATAAATTA | ATAAATACATAAATTAATTA   | ATAAATACATAAATTAATTA | ATAAATACATAAATTAATTA   |      |   |      | 7017 |
| Leptotyphlops_dulcis       | : | CCCAATACATACAGG    | CCCAACCCCA |      |   |      |   | ATAAATACATAAATTA | ATAAATACATAAATTAATTA   | ATAAATACATAAATTAATTA | ATAAATACATAAATTAATTA   |      |   |      | 7030 |
| Caiman_crocodilus          | : | CCCAATACATACAGG    | CCCAACCCCA |      |   |      |   | ATAAATACATAAATTA | ATAAATACATAAATTAATTA   | ATAAATACATAAATTAATTA | ATAAATACATAAATTAATTA   |      |   |      | 7128 |
| Alligator_sinensis         | : | CCCAATACATACAGG    | CCCAACCCCA |      |   |      |   | ATAAATACATAAATTA | ATAAATACATAAATTAATTA   | ATAAATACATAAATTAATTA | ATAAATACATAAATTAATTA   |      |   |      | 7164 |
| Alligator_mississippiensis | : | CCCAATACATACAGG    | CCCAACCCCA |      |   |      |   | ATAAATACATAAATTA | ATAAATACATAAATTAATTA   | ATAAATACATAAATTAATTA | ATAAATACATAAATTAATTA   |      |   |      | 7110 |
| Gavialis_gangeticus        | : | CCCAATACATACAGG    | CCCAACCCCA |      |   |      |   | ATAAATACATAAATTA | ATAAATACATAAATTAATTA   | ATAAATACATAAATTAATTA | ATAAATACATAAATTAATTA   |      |   |      | 7138 |
| Crocodylus_moreletii       | : | CCCAATACATACAGG    | CCCAACCCCA |      |   |      |   | ATAAATACATAAATTA | ATAAATACATAAATTAATTA   | ATAAATACATAAATTAATTA | ATAAATACATAAATTAATTA   |      |   |      | 7114 |
| Dogania_subplana           | : | CCCAATACATACAGG    | CCCAACCCCA |      |   |      |   | ATAAATACATAAATTA | ATAAATACATAAATTAATTA   | ATAAATACATAAATTAATTA | ATAAATACATAAATTAATTA   |      |   |      | 7056 |
| Pelomedusa_subrufa         | : | CCCAATACATACAGG    | CCCAACCCCA |      |   |      |   | ATAAATACATAAATTA | ATAAATACATAAATTAATTA   | ATAAATACATAAATTAATTA | ATAAATACATAAATTAATTA   |      |   |      | 7080 |
| Chelysemys_picta           | : | CCCAATACATACAGG    | CCCAACCCCA |      |   |      |   | ATAAATACATAAATTA | ATAAATACATAAATTAATTA   | ATAAATACATAAATTAATTA | ATAAATACATAAATTAATTA   |      |   |      | 7098 |
| Chelonia_mydas             | : | CCCAATACATACAGG    | CCCAACCCCA |      |   |      |   | ATAAATACATAAATTA | ATAAATACATAAATTAATTA   | ATAAATACATAAATTAATTA | ATAAATACATAAATTAATTA   |      |   |      | 7101 |
| Tinamus_major              | : | CCCAATACATACAGG    | CCCAACCCCA |      |   |      |   | ATAAATACATAAATTA | ATAAATACATAAATTAATTA   | ATAAATACATAAATTAATTA | ATAAATACATAAATTAATTA   |      |   |      | 7077 |
| Smithornis_sharpei         | : | CCCAATACATACAGG    | CCCAACCCCA |      |   |      |   | ATAAATACATAAATTA | ATAAATACATAAATTAATTA   | ATAAATACATAAATTAATTA | ATAAATACATAAATTAATTA   |      |   |      | 7086 |
| Corvus_frugilegus          | : | CCCAATACATACAGG    | CCCAACCCCA |      |   |      |   | ATAAATACATAAATTA | ATAAATACATAAATTAATTA   | ATAAATACATAAATTAATTA | ATAAATACATAAATTAATTA   |      |   |      | 7086 |
| Vidua_chalybeata           | : | CCCAATACATACAGG    | CCCAACCCCA |      |   |      |   | ATAAATACATAAATTA | ATAAATACATAAATTAATTA   | ATAAATACATAAATTAATTA | ATAAATACATAAATTAATTA   |      |   |      | 7086 |
| Buteo_buteo                | : | CCCAATACATACAGG    | CCCAACCCCA |      |   |      |   | ATAAATACATAAATTA | ATAAATACATAAATTAATTA   | ATAAATACATAAATTAATTA | ATAAATACATAAATTAATTA   |      |   |      | 7086 |
| Falco_peregrinus           | : | CCCAATACATACAGG    | CCCAACCCCA |      |   |      |   | ATAAATACATAAATTA | ATAAATACATAAATTAATTA   | ATAAATACATAAATTAATTA | ATAAATACATAAATTAATTA   |      |   |      | 7083 |
| Dromaius_novaeollandiae    | : | CCCAATACATACAGG    | CCCAACCCCA |      |   |      |   | ATAAATACATAAATTA | ATAAATACATAAATTAATTA   | ATAAATACATAAATTAATTA | ATAAATACATAAATTAATTA   |      |   |      | 7080 |
| Struthio_camelus           | : | CCCAATACATACAGG    | CCCAACCCCA |      |   |      |   | ATAAATACATAAATTA | ATAAATACATAAATTAATTA   | ATAAATACATAAATTAATTA | ATAAATACATAAATTAATTA   |      |   |      | 7086 |
| Apteryx_haastii            | : | CCCAATACATACAGG    | CCCAACCCCA |      |   |      |   | ATAAATACATAAATTA | ATAAATACATAAATTAATTA   | ATAAATACATAAATTAATTA | ATAAATACATAAATTAATTA   |      |   |      | 7083 |
| Rhea_americana             | : | CCCAATACATACAGG    | CCCAACCCCA |      |   |      |   | ATAAATACATAAATTA | ATAAATACATAAATTAATTA   | ATAAATACATAAATTAATTA | ATAAATACATAAATTAATTA   |      |   |      | 7086 |
| Gallus_gallus              | : | CCCAATACATACAGG    | CCCAACCCCA |      |   |      |   | ATAAATACATAAATTA | ATAAATACATAAATTAATTA   | ATAAATACATAAATTAATTA | ATAAATACATAAATTAATTA   |      |   |      | 7080 |
| Ciconia_ciconia            | : | CCCAATACATACAGG    | CCCAACCCCA |      |   |      |   | ATAAATACATAAATTA | ATAAATACATAAATTAATTA   | ATAAATACATAAATTAATTA | ATAAATACATAAATTAATTA   |      |   |      | 7086 |
| Ciconia_boyciana           | : | CCCAATACATACAGG    | CCCAACCCCA |      |   |      |   | ATAAATACATAAATTA | ATAAATACATAAATTAATTA   | ATAAATACATAAATTAATTA | ATAAATACATAAATTAATTA   |      |   |      | 7086 |
| Iguana_iguana              | : | CCCAATACATACAGG    | CCCAACCCCA |      |   |      |   | ATAAATACATAAATTA | ATAAATACATAAATTAATTA   | ATAAATACATAAATTAATTA | ATAAATACATAAATTAATTA   |      |   |      | 7068 |
| Eumeces_egregius           | : | CCCAATACATACAGG    | CCCAACCCCA |      |   |      |   | ATAAATACATAAATTA | ATAAATACATAAATTAATTA   | ATAAATACATAAATTAATTA | ATAAATACATAAATTAATTA   |      |   |      | 7068 |
| Sphenodon_punctatus        | : | CCCAATACATACAGG    | CCCAACCCCA |      |   |      |   | ATAAATACATAAATTA | ATAAATACATAAATTAATTA   | ATAAATACATAAATTAATTA | ATAAATACATAAATTAATTA   |      |   |      | 7077 |
| Sceloporus_occidentalis    | : | CCCAATACATACAGG    | CCCAACCCCA |      |   |      |   | ATAAATACATAAATTA | ATAAATACATAAATTAATTA   | ATAAATACATAAATTAATTA | ATAAATACATAAATTAATTA   |      |   |      | 7068 |
| Cordylus_warreni           | : | CCCAATACATACAGG    | CCCAACCCCA |      |   |      |   | ATAAATACATAAATTA | ATAAATACATAAATTAATTA   | ATAAATACATAAATTAATTA | ATAAATACATAAATTAATTA   |      |   |      | 7071 |
| Abronia_graminea           | : | CCCAATACATACAGG    | CCCAACCCCA |      |   |      |   | ATAAATACATAAATTA | ATAAATACATAAATTAATTA   | ATAAATACATAAATTAATTA | ATAAATACATAAATTAATTA   |      |   |      | 7071 |
| Shinisaurus_crocodilurus   | : | CCCAATACATACAGG    | CCCAACCCCA |      |   |      |   | ATAAATACATAAATTA | ATAAATACATAAATTAATTA   | ATAAATACATAAATTAATTA | ATAAATACATAAATTAATTA   |      |   |      | 7059 |
| Varanus_komodoensis        | : | CCCAATACATACAGG    | CCCAACCCCA |      |   |      |   | ATAAATACATAAATTA | ATAAATACATAAATTAATTA   | ATAAATACATAAATTAATTA | ATAAATACATAAATTAATTA   |      |   |      | 7113 |
| Rhineura_floridana         | : | CCCAATACATACAGG    | CCCAACCCCA |      |   |      |   | ATAAATACATAAATTA | ATAAATACATAAATTAATTA   | ATAAATACATAAATTAATTA | ATAAATACATAAATTAATTA   |      |   |      | 7050 |
| Geocalamus_acutus          | : | CCCAATACATACAGG    | CCCAACCCCA |      |   |      |   | ATAAATACATAAATTA | ATAAATACATAAATTAATTA   | ATAAATACATAAATTAATTA | ATAAATACATAAATTAATTA   |      |   |      | 7044 |
| Diplometopon_zarudnyi      | : | CCCAATACATACAGG    | CCCAACCCCA |      |   |      |   | ATAAATACATAAATTA | ATAAATACATAAATTAATTA   | ATAAATACATAAATTAATTA | ATAAATACATAAATTAATTA   |      |   |      | 7056 |
| Amphisbaena_schmidti       | : | CCCAATACATACAGG    | CCCAACCCCA |      |   |      |   | ATAAATACATAAATTA | ATAAATACATAAATTAATTA   | ATAAATACATAAATTAATTA | ATAAATACATAAATTAATTA   |      |   |      | 7053 |
| Bipes_tridactylus          | : | CCCAATACATACAGG    | CCCAACCCCA |      |   |      |   | ATAAATACATAAATTA | ATAAATACATAAATTAATTA   | ATAAATACATAAATTAATTA | ATAAATACATAAATTAATTA   |      |   |      | 7044 |
| Bipes_canaliculatus        | : | CCCAATACATACAGG    | CCCAACCCCA |      |   |      |   | ATAAATACATAAATTA | ATAAATACATAAATTAATTA   | ATAAATACATAAATTAATTA | ATAAATACATAAATTAATTA   |      |   |      | 7056 |
| Bipes_biporus              | : | CCCAATACATACAGG    | CCCAACCCCA |      |   |      |   | ATAAATACATAAATTA | ATAAATACATAAATTAATTA   | ATAAATACATAAATTAATTA | ATAAATACATAAATTAATTA   |      |   |      | 7098 |
| Anolis_carolinensis        | : | CCCAATACATACAGG    | CCCAACCCCA |      |   |      |   | ATAAATACATAAATTA | ATAAATACATAAATTAATTA   | ATAAATACATAAATTAATTA | ATAAATACATAAATTAATTA   |      |   |      | 6740 |
| Ophisaurus_attenuatus      | : | CCCAATACATACAGG    | CCCAACCCCA |      |   |      |   | ATAAATACATAAATTA | ATAAATACATAAATTAATTA   | ATAAATACATAAATTAATTA | ATAAATACATAAATTAATTA   |      |   |      | 6697 |
| Varanus_salvator           | : | CCCAATACATACAGG    | CCCAACCCCA |      |   |      |   | ATAAATACATAAATTA | ATAAATACATAAATTAATTA   | ATAAATACATAAATTAATTA | ATAAATACATAAATTAATTA   |      |   |      | 7105 |
| Mertensiella_luschani      | : | CCCAATACATACAGG    | CCCAACCCCA |      |   |      |   | ATAAATACATAAATTA | ATAAATACATAAATTAATTA   | ATAAATACATAAATTAATTA | ATAAATACATAAATTAATTA   |      |   |      | 7092 |
| Xenopus_laevis             | : | CCCAATACATACAGG    | CCCAACCCCA |      |   |      |   | ATAAATACATAAATTA | ATAAATACATAAATTAATTA   | ATAAATACATAAATTAATTA | ATAAATACATAAATTAATTA   |      |   |      | 7074 |

|                            |   |    |      |    |      |    |      |    |      |    |      |    |      |    |    |
|----------------------------|---|----|------|----|------|----|------|----|------|----|------|----|------|----|----|
|                            |   | *  | 7600 | *  | 7620 | *  | 7640 | *  | 7660 | *  | 7680 | *  | 7700 | *  |    |
| Bos_taurus                 | : | CC | CC   | CC | CC   | CC | CC   | CC | CC   | CC | CC   | CC | CC   | CC | CC |
| Hylobates_lar              | : | CC | CC   | CC | CC   | CC | CC   | CC | CC   | CC | CC   | CC | CC   | CC | CC |
| Lemur_catta                | : | CC | CC   | CC | CC   | CC | CC   | CC | CC   | CC | CC   | CC | CC   | CC | CC |
| Nycticebus_coucang         | : | CC | CC   | CC | CC   | CC | CC   | CC | CC   | CC | CC   | CC | CC   | CC | CC |
| Tarsius_bancanus           | : | CC | CC   | CC | CC   | CC | CC   | CC | CC   | CC | CC   | CC | CC   | CC | CC |
| Gorilla_gorilla            | : | CC | CC   | CC | CC   | CC | CC   | CC | CC   | CC | CC   | CC | CC   | CC | CC |
| Homo_sapiens               | : | CC | CC   | CC | CC   | CC | CC   | CC | CC   | CC | CC   | CC | CC   | CC | CC |
| Papio_hamadryas            | : | CC | CC   | CC | CC   | CC | CC   | CC | CC   | CC | CC   | CC | CC   | CC | CC |
| Cebus_albifrons            | : | CC | CC   | CC | CC   | CC | CC   | CC | CC   | CC | CC   | CC | CC   | CC | CC |
| Macaca_sylvanus            | : | CC | CC   | CC | CC   | CC | CC   | CC | CC   | CC | CC   | CC | CC   | CC | CC |
| Pongo_pygmaeus             | : | CC | CC   | CC | CC   | CC | CC   | CC | CC   | CC | CC   | CC | CC   | CC | CC |
| Pan_paniscus               | : | CC | CC   | CC | CC   | CC | CC   | CC | CC   | CC | CC   | CC | CC   | CC | CC |
| Agkistrodon_piscivorus     | : | CC | CC   | CC | CC   | CC | CC   | CC | CC   | CC | CC   | CC | CC   | CC | CC |
| Pantherophis_guttatus      | : | CC | CC   | CC | CC   | CC | CC   | CC | CC   | CC | CC   | CC | CC   | CC | CC |
| Dinodon_semicarinatus      | : | CC | CC   | CC | CC   | CC | CC   | CC | CC   | CC | CC   | CC | CC   | CC | CC |
| Boa_constrictor            | : | CC | CC   | CC | CC   | CC | CC   | CC | CC   | CC | CC   | CC | CC   | CC | CC |
| Python_regius              | : | CC | CC   | CC | CC   | CC | CC   | CC | CC   | CC | CC   | CC | CC   | CC | CC |
| Acrochordus_granulatus     | : | CC | CC   | CC | CC   | CC | CC   | CC | CC   | CC | CC   | CC | CC   | CC | CC |
| Cylindrophis_ruffus        | : | CC | CC   | CC | CC   | CC | CC   | CC | CC   | CC | CC   | CC | CC   | CC | CC |
| Ovophis_okinavensis        | : | CC | CC   | CC | CC   | CC | CC   | CC | CC   | CC | CC   | CC | CC   | CC | CC |
| Xenopeltis_unicolor        | : | CC | CC   | CC | CC   | CC | CC   | CC | CC   | CC | CC   | CC | CC   | CC | CC |
| Typhlops_reticulatus       | : | CC | CC   | CC | CC   | CC | CC   | CC | CC   | CC | CC   | CC | CC   | CC | CC |
| Leptotyphlops_dulcis       | : | CC | CC   | CC | CC   | CC | CC   | CC | CC   | CC | CC   | CC | CC   | CC | CC |
| Caiman_crocodilus          | : | CC | CC   | CC | CC   | CC | CC   | CC | CC   | CC | CC   | CC | CC   | CC | CC |
| Alligator_sinensis         | : | CC | CC   | CC | CC   | CC | CC   | CC | CC   | CC | CC   | CC | CC   | CC | CC |
| Alligator_mississippiensis | : | CC | CC   | CC | CC   | CC | CC   | CC | CC   | CC | CC   | CC | CC   | CC | CC |
| Gavialis_gangeticus        | : | CC | CC   | CC | CC   | CC | CC   | CC | CC   | CC | CC   | CC | CC   | CC | CC |
| Crocodylus_moreletii       | : | CC | CC   | CC | CC   | CC | CC   | CC | CC   | CC | CC   | CC | CC   | CC | CC |
| Dogania_subplana           | : | CC | CC   | CC | CC   | CC | CC   | CC | CC   | CC | CC   | CC | CC   | CC | CC |
| Pelomedusa_subrufa         | : | CC | CC   | CC | CC   | CC | CC   | CC | CC   | CC | CC   | CC | CC   | CC | CC |
| Chrysemys_picta            | : | CC | CC   | CC | CC   | CC | CC   | CC | CC   | CC | CC   | CC | CC   | CC | CC |
| Chelonia_mydas             | : | CC | CC   | CC | CC   | CC | CC   | CC | CC   | CC | CC   | CC | CC   | CC | CC |
| Tinamus_major              | : | CC | CC   | CC | CC   | CC | CC   | CC | CC   | CC | CC   | CC | CC   | CC | CC |
| Smithornis_sharpei         | : | CC | CC   | CC | CC   | CC | CC   | CC | CC   | CC | CC   | CC | CC   | CC | CC |
| Corvus_frugilegus          | : | CC | CC   | CC | CC   | CC | CC   | CC | CC   | CC | CC   | CC | CC   | CC | CC |
| Vidua_chalybeata           | : | CC | CC   | CC | CC   | CC | CC   | CC | CC   | CC | CC   | CC | CC   | CC | CC |
| Buteo_buteo                | : | CC | CC   | CC | CC   | CC | CC   | CC | CC   | CC | CC   | CC | CC   | CC | CC |
| Falco_peregrinus           | : | CC | CC   | CC | CC   | CC | CC   | CC | CC   | CC | CC   | CC | CC   | CC | CC |
| Dromaius_novaeollandiae    | : | CC | CC   | CC | CC   | CC | CC   | CC | CC   | CC | CC   | CC | CC   | CC | CC |
| Struthio_camelus           | : | CC | CC   | CC | CC   | CC | CC   | CC | CC   | CC | CC   | CC | CC   | CC | CC |
| Apteryx_haastii            | : | CC | CC   | CC | CC   | CC | CC   | CC | CC   | CC | CC   | CC | CC   | CC | CC |
| Rhea_americanana           | : | CC | CC   | CC | CC   | CC | CC   | CC | CC   | CC | CC   | CC | CC   | CC | CC |
| Gallus_gallus              | : | CC | CC   | CC | CC   | CC | CC   | CC | CC   | CC | CC   | CC | CC   | CC | CC |
| Ciconia_ciconia            | : | CC | CC   | CC | CC   | CC | CC   | CC | CC   | CC | CC   | CC | CC   | CC | CC |
| Ciconia_boyciana           | : | CC | CC   | CC | CC   | CC | CC   | CC | CC   | CC | CC   | CC | CC   | CC | CC |
| Iguana_iguana              | : | CC | CC   | CC | CC   | CC | CC   | CC | CC   | CC | CC   | CC | CC   | CC | CC |
| Eumeces_egregius           | : | CC | CC   | CC | CC   | CC | CC   | CC | CC   | CC | CC   | CC | CC   | CC | CC |
| Sphenodon_punctatus        | : | CC | CC   | CC | CC   | CC | CC   | CC | CC   | CC | CC   | CC | CC   | CC | CC |
| Sceloporus_occidentalis    | : | CC | CC   | CC | CC   | CC | CC   | CC | CC   | CC | CC   | CC | CC   | CC | CC |
| Cordylus_warreni           | : | CC | CC   | CC | CC   | CC | CC   | CC | CC   | CC | CC   | CC | CC   | CC | CC |
| Abronia_graminea           | : | CC | CC   | CC | CC   | CC | CC   | CC | CC   | CC | CC   | CC | CC   | CC | CC |
| Shinisaurus_crocodilurus   | : | CC | CC   | CC | CC   | CC | CC   | CC | CC   | CC | CC   | CC | CC   | CC | CC |
| Varanus_komodoensis        | : | CC | CC   | CC | CC   | CC | CC   | CC | CC   | CC | CC   | CC | CC   | CC | CC |
| Rhineura_floridana         | : | CC | CC   | CC | CC   | CC | CC   | CC | CC   | CC | CC   | CC | CC   | CC | CC |
| Geocalamus_acutus          | : | CC | CC   | CC | CC   | CC | CC   | CC | CC   | CC | CC   | CC | CC   | CC | CC |
| Diplometopon_zarudnyi      | : | CC | CC   | CC | CC   | CC | CC   | CC | CC   | CC | CC   | CC | CC   | CC | CC |
| Amphisbaena_schmidti       | : | CC | CC   | CC | CC   | CC | CC   | CC | CC   | CC | CC   | CC | CC   | CC | CC |
| Bipes_tridactylus          | : | CC | CC   | CC | CC   | CC | CC   | CC | CC   | CC | CC   | CC | CC   | CC | CC |
| Bipes_canaliculatus        | : | CC | CC   | CC | CC   | CC | CC   | CC | CC   | CC | CC   | CC | CC   | CC | CC |
| Bipes_biporus              | : | CC | CC   | CC | CC   | CC | CC   | CC | CC   | CC | CC   | CC | CC   | CC | CC |
| Anolis_carolinensis        | : | CC | CC   | CC | CC   | CC | CC   | CC | CC   | CC | CC   | CC | CC   | CC | CC |
| Ophisaurus_atnuatus        | : | CC | CC   | CC | CC   | CC | CC   | CC | CC   | CC | CC   | CC | CC   | CC | CC |
| Varanus_salvator           | : | CC | CC   | CC | CC   | CC | CC   | CC | CC   | CC | CC   | CC | CC   | CC | CC |
| Mertensiella_luschani      | : | CC | CC   | CC | CC   | CC | CC   | CC | CC   | CC | CC   | CC | CC   | CC | CC |
| Xenopus_laevis             | : | CC | CC   | CC | CC   | CC | CC   | CC | CC   | CC | CC   | CC | CC   | CC | CC |

|                            | 7720 | *    | 7740 | *  | 7760 | *  | 7780 | *  | 7800 | *  | 7820 | *  | 7840 |      |
|----------------------------|------|------|------|----|------|----|------|----|------|----|------|----|------|------|
| Bos_taurus                 | :    | GCAC | CC   | CC | CA   | CC | CC   | CC | CC   | CC | CC   | CC | CC   | 7349 |
| Hylobates_lar              | :    | TGCT | CC   | CC | CC   | CC | CC   | CC | CC   | CC | CC   | CC | CC   | 7358 |
| Lemur_catta                | :    | TGCT | CC   | CC | CC   | CC | CC   | CC | CC   | CC | CC   | CC | CC   | 7355 |
| Nycticebus_coucang         | :    | TGCT | CC   | CC | CC   | CC | CC   | CC | CC   | CC | CC   | CC | CC   | 7352 |
| Tarsius_bancanus           | :    | TGCT | CC   | CC | CC   | CC | CC   | CC | CC   | CC | CC   | CC | CC   | 7352 |
| Gorilla_gorilla            | :    | TGCT | CC   | CC | CC   | CC | CC   | CC | CC   | CC | CC   | CC | CC   | 7358 |
| Homo_sapiens               | :    | TGCT | CC   | CC | CC   | CC | CC   | CC | CC   | CC | CC   | CC | CC   | 7349 |
| Papio_hamadryas            | :    | TGCT | CC   | CC | CC   | CC | CC   | CC | CC   | CC | CC   | CC | CC   | 7361 |
| Cebus_albifrons            | :    | TGCT | CC   | CC | CC   | CC | CC   | CC | CC   | CC | CC   | CC | CC   | 7355 |
| Macaca_sylvanus            | :    | TGCT | CC   | CC | CC   | CC | CC   | CC | CC   | CC | CC   | CC | CC   | 7355 |
| Pongo_pygmaeus             | :    | TGCT | CC   | CC | CC   | CC | CC   | CC | CC   | CC | CC   | CC | CC   | 7358 |
| Pan_paniscus               | :    | TGCT | CC   | CC | CC   | CC | CC   | CC | CC   | CC | CC   | CC | CC   | 7358 |
| Agkistrodon_piscivorus     | :    | TGCT | CC   | CC | CC   | CC | CC   | CC | CC   | CC | CC   | CC | CC   | 7343 |
| Pantherophis_guttatus      | :    | TGCT | CC   | CC | CC   | CC | CC   | CC | CC   | CC | CC   | CC | CC   | 7343 |
| Dinodon_semicarinatus      | :    | TGCT | CC   | CC | CC   | CC | CC   | CC | CC   | CC | CC   | CC | CC   | 7343 |
| Boa_constrictor            | :    | TGCT | CC   | CC | CC   | CC | CC   | CC | CC   | CC | CC   | CC | CC   | 7352 |
| Python_regius              | :    | TGCT | CC   | CC | CC   | CC | CC   | CC | CC   | CC | CC   | CC | CC   | 7349 |
| Acrochordus_granulatus     | :    | TGCT | CC   | CC | CC   | CC | CC   | CC | CC   | CC | CC   | CC | CC   | 7346 |
| Cylindrophis_ruffus        | :    | TGCT | CC   | CC | CC   | CC | CC   | CC | CC   | CC | CC   | CC | CC   | 7316 |
| Ovophis_okinavensis        | :    | TGCT | CC   | CC | CC   | CC | CC   | CC | CC   | CC | CC   | CC | CC   | 7343 |
| Xenopeltis_unicolor        | :    | TGCT | CC   | CC | CC   | CC | CC   | CC | CC   | CC | CC   | CC | CC   | 7355 |
| Typhlops_reticulatus       | :    | TGCT | CC   | CC | CC   | CC | CC   | CC | CC   | CC | CC   | CC | CC   | 7283 |
| Leptotyphlops_dulcis       | :    | TGCT | CC   | CC | CC   | CC | CC   | CC | CC   | CC | CC   | CC | CC   | 7296 |
| Caiman_crocodilus          | :    | TGCT | CC   | CC | CC   | CC | CC   | CC | CC   | CC | CC   | CC | CC   | 7394 |
| Alligator_sinensis         | :    | TGCT | CC   | CC | CC   | CC | CC   | CC | CC   | CC | CC   | CC | CC   | 7430 |
| Alligator_mississippiensis | :    | TGCT | CC   | CC | CC   | CC | CC   | CC | CC   | CC | CC   | CC | CC   | 7376 |
| Gavialis_gangeticus        | :    | TGCT | CC   | CC | CC   | CC | CC   | CC | CC   | CC | CC   | CC | CC   | 7404 |
| Crocodylus_moreletii       | :    | TGCT | CC   | CC | CC   | CC | CC   | CC | CC   | CC | CC   | CC | CC   | 7380 |
| Dogania_subplana           | :    | TGCT | CC   | CC | CC   | CC | CC   | CC | CC   | CC | CC   | CC | CC   | 7319 |
| Pelomedusa_subrufa         | :    | TGCT | CC   | CC | CC   | CC | CC   | CC | CC   | CC | CC   | CC | CC   | 7346 |
| Chrysemys_picta            | :    | TGCT | CC   | CC | CC   | CC | CC   | CC | CC   | CC | CC   | CC | CC   | 7364 |
| Chelonia_mydas             | :    | TGCT | CC   | CC | CC   | CC | CC   | CC | CC   | CC | CC   | CC | CC   | 7367 |
| Tinamus_major              | :    | TGCT | CC   | CC | CC   | CC | CC   | CC | CC   | CC | CC   | CC | CC   | 7343 |
| Smithornis_sharpei         | :    | TGCT | CC   | CC | CC   | CC | CC   | CC | CC   | CC | CC   | CC | CC   | 7352 |
| Corvus_frugilegus          | :    | TGCT | CC   | CC | CC   | CC | CC   | CC | CC   | CC | CC   | CC | CC   | 7352 |
| Vidua_chalybeata           | :    | TGCT | CC   | CC | CC   | CC | CC   | CC | CC   | CC | CC   | CC | CC   | 7352 |
| Buteo_buteo                | :    | TGCT | CC   | CC | CC   | CC | CC   | CC | CC   | CC | CC   | CC | CC   | 7352 |
| Falco_peregrinus           | :    | TGCT | CC   | CC | CC   | CC | CC   | CC | CC   | CC | CC   | CC | CC   | 7349 |
| Dromaius_novaeollandiae    | :    | TGCT | CC   | CC | CC   | CC | CC   | CC | CC   | CC | CC   | CC | CC   | 7346 |
| Struthio_camelus           | :    | TGCT | CC   | CC | CC   | CC | CC   | CC | CC   | CC | CC   | CC | CC   | 7352 |
| Apteryx_haastii            | :    | TGCT | CC   | CC | CC   | CC | CC   | CC | CC   | CC | CC   | CC | CC   | 7349 |
| Rhea_americanana           | :    | TGCT | CC   | CC | CC   | CC | CC   | CC | CC   | CC | CC   | CC | CC   | 7352 |
| Gallus_gallus              | :    | TGCT | CC   | CC | CC   | CC | CC   | CC | CC   | CC | CC   | CC | CC   | 7346 |
| Ciconia_ciconia            | :    | TGCT | CC   | CC | CC   | CC | CC   | CC | CC   | CC | CC   | CC | CC   | 7352 |
| Ciconia_boycciana          | :    | TGCT | CC   | CC | CC   | CC | CC   | CC | CC   | CC | CC   | CC | CC   | 7352 |
| Iguana_iguana              | :    | TGCT | CC   | CC | CC   | CC | CC   | CC | CC   | CC | CC   | CC | CC   | 7334 |
| Eumeces_egregius           | :    | TGCT | CC   | CC | CC   | CC | CC   | CC | CC   | CC | CC   | CC | CC   | 7334 |
| Sphenodon_punctatus        | :    | TGCT | CC   | CC | CC   | CC | CC   | CC | CC   | CC | CC   | CC | CC   | 7343 |
| Sceloporus_occidentalis    | :    | TGCT | CC   | CC | CC   | CC | CC   | CC | CC   | CC | CC   | CC | CC   | 7334 |
| Cordylus_warreni           | :    | TGCT | CC   | CC | CC   | CC | CC   | CC | CC   | CC | CC   | CC | CC   | 7337 |
| Abronia_graminea           | :    | TGCT | CC   | CC | CC   | CC | CC   | CC | CC   | CC | CC   | CC | CC   | 7337 |
| Shinisaurus_crocodilurus   | :    | TGCT | CC   | CC | CC   | CC | CC   | CC | CC   | CC | CC   | CC | CC   | 7325 |
| Varanus_komodoensis        | :    | TGCT | CC   | CC | CC   | CC | CC   | CC | CC   | CC | CC   | CC | CC   | 7379 |
| Rhineura_floridana         | :    | TGCT | CC   | CC | CC   | CC | CC   | CC | CC   | CC | CC   | CC | CC   | 7316 |
| Geocalamus_acutus          | :    | TGCT | CC   | CC | CC   | CC | CC   | CC | CC   | CC | CC   | CC | CC   | 7310 |
| Diplometopon_zarudnyi      | :    | TGCT | CC   | CC | CC   | CC | CC   | CC | CC   | CC | CC   | CC | CC   | 7322 |
| Amphisbaena_schmidti       | :    | TGCT | CC   | CC | CC   | CC | CC   | CC | CC   | CC | CC   | CC | CC   | 7319 |
| Bipes_tridactylus          | :    | TGCT | CC   | CC | CC   | CC | CC   | CC | CC   | CC | CC   | CC | CC   | 7310 |
| Bipes_canaliculatus        | :    | TGCT | CC   | CC | CC   | CC | CC   | CC | CC   | CC | CC   | CC | CC   | 7322 |
| Bipes_biporus              | :    | TGCT | CC   | CC | CC   | CC | CC   | CC | CC   | CC | CC   | CC | CC   | 7364 |
| Anolis_carolinensis        | :    | TGCT | CC   | CC | CC   | CC | CC   | CC | CC   | CC | CC   | CC | CC   | 7006 |
| Ophisaurus_attenuatus      | :    | TGCT | CC   | CC | CC   | CC | CC   | CC | CC   | CC | CC   | CC | CC   | 6961 |
| Varanus_salvator           | :    | TGCT | CC   | CC | CC   | CC | CC   | CC | CC   | CC | CC   | CC | CC   | 7371 |
| Mertensiella_luschani      | :    | TGCT | CC   | CC | CC   | CC | CC   | CC | CC   | CC | CC   | CC | CC   | 7355 |
| Xenopus_laevis             | :    | TGCT | CC   | CC | CC   | CC | CC   | CC | CC   | CC | CC   | CC | CC   | 7340 |

|                            | * | 7860 | *  | 7880 | *   | 7900 | *  | 7920 | *  | 7940 | *  | 7960 | *  | 7980 |      |
|----------------------------|---|------|----|------|-----|------|----|------|----|------|----|------|----|------|------|
| Bos_taurus                 | : | AA   | CC | GA   | --- | AT   | GC | AAAA | TA | CA   | TA | CC   | AA | CA   | 7437 |
| Hylobates_lar              | : | GG   | CG | GA   | --- | AT   | GC | TAA  | G  | TA   | AT | CC   | CC | AC   | 7446 |
| Lemur_catta                | : | AG   | TA | GA   | --- | AT   | GC | AAAA | TA | CA   | TA | CC   | AA | CA   | 7443 |
| Nycticebus_coucang         | : | AC   | AA | GA   | --- | AT   | GC | AAAA | TA | CA   | TA | CC   | AA | CA   | 7440 |
| Tarsius_bancanus           | : | AA   | CC | GA   | --- | AT   | GC | AAAA | TA | CA   | TA | CC   | AA | CA   | 7440 |
| Gorilla_gorilla            | : | GG   | CG | GA   | --- | AT   | GC | AAAA | TA | CA   | TA | CC   | AA | CA   | 7446 |
| Homo_sapiens               | : | AG   | CG | GA   | --- | AT   | GC | AAAA | TA | CA   | TA | CC   | AA | CA   | 7437 |
| Papio_hamadryas            | : | AA   | CG | GA   | --- | AT   | GC | AAAA | TA | CA   | TA | CC   | AA | CA   | 7446 |
| Cebus_albifrons            | : | AG   | CG | GA   | --- | AT   | GC | AAAA | TA | CA   | TA | CC   | AA | CA   | 7443 |
| Macaca_sylvanus            | : | AG   | CG | GA   | --- | AT   | GC | AAAA | TA | CA   | TA | CC   | AA | CA   | 7443 |
| Pongo_pygmaeus             | : | AA   | CC | GA   | --- | AT   | GC | AAAA | TA | CA   | TA | CC   | AA | CA   | 7446 |
| Pan_paniscus               | : | AG   | CG | GA   | --- | AT   | GC | AAAA | TA | CA   | TA | CC   | AA | CA   | 7446 |
| Agkistrodon_piscivorus     | : | AA   | CG | GA   | --- | AT   | GC | AAAA | TA | CA   | TA | CC   | AA | CA   | 7431 |
| Pantherophis_guttatus      | : | AA   | CG | GA   | --- | AT   | GC | AAAA | TA | CA   | TA | CC   | AA | CA   | 7431 |
| Dinodon_semicarinatus      | : | AA   | CG | GA   | --- | AT   | GC | AAAA | TA | CA   | TA | CC   | AA | CA   | 7431 |
| Boa_constrictor            | : | AG   | CG | GA   | --- | AT   | GC | AAAA | TA | CA   | TA | CC   | AA | CA   | 7440 |
| Python_regius              | : | AA   | CG | GA   | --- | AT   | GC | AAAA | TA | CA   | TA | CC   | AA | CA   | 7437 |
| Acrochordus_granulatus     | : | AA   | CG | GA   | --- | AT   | GC | AAAA | TA | CA   | TA | CC   | AA | CA   | 7434 |
| Cylindrophis_ruffus        | : | AG   | CG | GA   | --- | AT   | GC | AAAA | TA | CA   | TA | CC   | AA | CA   | 7404 |
| Ovophis_okinavensis        | : | AA   | CG | GA   | --- | AT   | GC | AAAA | TA | CA   | TA | CC   | AA | CA   | 7431 |
| Xenopeltis_unicolor        | : | AA   | CG | GA   | --- | AT   | GC | AAAA | TA | CA   | TA | CC   | AA | CA   | 7443 |
| Typhlops_reticulatus       | : | AG   | CG | GA   | --- | AT   | GC | AAAA | TA | CA   | TA | CC   | AA | CA   | 7371 |
| Leptotyphlops_dulcis       | : | AG   | CG | GA   | --- | AT   | GC | AAAA | TA | CA   | TA | CC   | AA | CA   | 7384 |
| Caiman_crocodylus          | : | GG   | CG | GA   | --- | AT   | GC | AAAA | TA | CA   | TA | CC   | AA | CA   | 7482 |
| Alligator_sinensis         | : | AG   | CG | GA   | --- | AT   | GC | AAAA | TA | CA   | TA | CC   | AA | CA   | 7518 |
| Alligator_mississippiensis | : | AG   | CG | GA   | --- | AT   | GC | AAAA | TA | CA   | TA | CC   | AA | CA   | 7464 |
| Gavialis_gangeticus        | : | AG   | CG | GA   | --- | AT   | GC | AAAA | TA | CA   | TA | CC   | AA | CA   | 7492 |
| Crocodylus_moreletii       | : | AG   | CG | GA   | --- | AT   | GC | AAAA | TA | CA   | TA | CC   | AA | CA   | 7468 |
| Dogania_subplana           | : | AG   | CG | GA   | --- | AT   | GC | AAAA | TA | CA   | TA | CC   | AA | CA   | 7407 |
| Pelomedusa_subrufa         | : | AC   | CA | AA   | --- | AT   | GC | AAAA | TA | CA   | TA | CC   | AA | CA   | 7434 |
| Chrysemys_picta            | : | GG   | CG | GA   | --- | AT   | GC | AAAA | TA | CA   | TA | CC   | AA | CA   | 7452 |
| Chelonia_mydas             | : | AG   | CG | GA   | --- | AT   | GC | AAAA | TA | CA   | TA | CC   | AA | CA   | 7455 |
| Tinamus_major              | : | AG   | CG | GA   | --- | AT   | GC | AAAA | TA | CA   | TA | CC   | AA | CA   | 7431 |
| Smithornis_sharpei         | : | AG   | CG | GA   | --- | AT   | GC | AAAA | TA | CA   | TA | CC   | AA | CA   | 7440 |
| Corvus_frugilegus          | : | AG   | CG | GA   | --- | AT   | GC | AAAA | TA | CA   | TA | CC   | AA | CA   | 7440 |
| Vidua_chalybeata           | : | GG   | CG | GA   | --- | AT   | GC | AAAA | TA | CA   | TA | CC   | AA | CA   | 7440 |
| Buteo_buteo                | : | AG   | CG | GA   | --- | AT   | GC | AAAA | TA | CA   | TA | CC   | AA | CA   | 7437 |
| Falco_peregrinus           | : | AG   | CG | GA   | --- | AT   | GC | AAAA | TA | CA   | TA | CC   | AA | CA   | 7434 |
| Dromaius_novaehollandiae   | : | GG   | CG | GA   | --- | AT   | GC | AAAA | TA | CA   | TA | CC   | AA | CA   | 7434 |
| Struthio_camelus           | : | GG   | CG | GA   | --- | AT   | GC | AAAA | TA | CA   | TA | CC   | AA | CA   | 7440 |
| Apteryx_haastii            | : | GG   | CG | GA   | --- | AT   | GC | AAAA | TA | CA   | TA | CC   | AA | CA   | 7437 |
| Rhea_americana             | : | AG   | CG | GA   | --- | AT   | GC | AAAA | TA | CA   | TA | CC   | AA | CA   | 7440 |
| Gallus_gallus              | : | AG   | CG | GA   | --- | AT   | GC | AAAA | TA | CA   | TA | CC   | AA | CA   | 7434 |
| Ciconia_ciconia            | : | AG   | CG | GA   | --- | AT   | GC | AAAA | TA | CA   | TA | CC   | AA | CA   | 7440 |
| Ciconia_boyciana           | : | AG   | CG | GA   | --- | AT   | GC | AAAA | TA | CA   | TA | CC   | AA | CA   | 7440 |
| Iguana_iguana              | : | AG   | CG | GA   | --- | AT   | GC | AAAA | TA | CA   | TA | CC   | AA | CA   | 7422 |
| Eumeces_egregius           | : | GG   | CG | GA   | --- | AT   | GC | AAAA | TA | CA   | TA | CC   | AA | CA   | 7422 |
| Sphenodon_punctatus        | : | AG   | CG | GA   | --- | AT   | GC | AAAA | TA | CA   | TA | CC   | AA | CA   | 7431 |
| Sceloporus_occidentalis    | : | AG   | CG | GA   | --- | AT   | GC | AAAA | TA | CA   | TA | CC   | AA | CA   | 7422 |
| Cordylus_warreni           | : | GG   | CG | GA   | --- | AT   | GC | AAAA | TA | CA   | TA | CC   | AA | CA   | 7425 |
| Abronia_graminea           | : | GG   | CG | GA   | --- | AT   | GC | AAAA | TA | CA   | TA | CC   | AA | CA   | 7413 |
| Shinisaurus_crocodylurus   | : | GG   | CG | GA   | --- | AT   | GC | AAAA | TA | CA   | TA | CC   | AA | CA   | 7413 |
| Varanus_komodoensis        | : | AG   | CG | GA   | --- | AT   | GC | AAAA | TA | CA   | TA | CC   | AA | CA   | 7467 |
| Rhineura_floridana         | : | AG   | CG | GA   | --- | AT   | GC | AAAA | TA | CA   | TA | CC   | AA | CA   | 7404 |
| Geocalamus_acutus          | : | AG   | CG | GA   | --- | AT   | GC | AAAA | TA | CA   | TA | CC   | AA | CA   | 7398 |
| Diplometopon_zarudnyi      | : | AG   | CG | GA   | --- | AT   | GC | AAAA | TA | CA   | TA | CC   | AA | CA   | 7410 |
| Amphisbaena_schmidti       | : | AG   | CG | GA   | --- | AT   | GC | AAAA | TA | CA   | TA | CC   | AA | CA   | 7407 |
| Bipes_tridactylus          | : | AG   | CG | GA   | --- | AT   | GC | AAAA | TA | CA   | TA | CC   | AA | CA   | 7398 |
| Bipes_canaliculatus        | : | AG   | CG | GA   | --- | AT   | GC | AAAA | TA | CA   | TA | CC   | AA | CA   | 7410 |
| Bipes_biporus              | : | GG   | CG | GA   | --- | AT   | GC | AAAA | TA | CA   | TA | CC   | AA | CA   | 7452 |
| Anolis_carolinensis        | : | GG   | CG | GA   | --- | AT   | GC | AAAA | TA | CA   | TA | CC   | AA | CA   | 7094 |
| Ophisaurus_attenuatus      | : | GG   | CG | GA   | --- | AT   | GC | AAAA | TA | CA   | TA | CC   | AA | CA   | 7049 |
| Varanus_salvator           | : | AA   | CG | GA   | --- | AT   | GC | AAAA | TA | CA   | TA | CC   | AA | CA   | 7459 |
| Mertensiella_luschani      | : | GG   | CG | GA   | --- | AT   | GC | AAAA | TA | CA   | TA | CC   | AA | CA   | 7443 |
| Xenopus_laevis             | : | AG   | CG | GA   | --- | AT   | GC | AAAA | TA | CA   | TA | CC   | AA | CA   | 7428 |





```

8120      *      8140      *      8160      *      8180      *      8200      *      8220      *      8240
Bos_taurus      : GCGTCCGCGCCTAATAAGTAAGAGCCAGCACTGATGAAAGGAAAAAGCCGAGGAAAAAATATATATACATGGTGAATGCAATCAACATAGCCAAATATAACCTTACGGCCAGCAACG 7700
Hylobates_lar  : GACTGTCGCCCCAATAAATCATAGAGCCAGCAACCCCTTACCCAGCGACCCCTCTAGAAAAAANCTGACCTTAAATTAATATATCCGACGCGCACTAATTTAATTAACATTCGCGCCACGAACT 7709
Lemur_catta    : GAGTATGTCGCGCTATAATATATAGAGCCAGCAACCCCTTACCCAGCGACCCCTCTAGAAAAAANCTGACCTTAAATTAATATATCCGACGCGCACTAATTTAATTAACATTCGCGCCACGAACT 7706
Nycticebus_coucang : GACTACTGCGCCGATAAATATAGAGCCAGCAACCCCTTACCCAGCGACCCCTCTAGAAAAAANCTGACCTTAAATTAATATATCCGACGCGCACTAATTTAATTAACATTCGCGCCACGAACT 7700
Tarsius_bancanus : GACTACTGCGCCGATAAATATAGAGCCAGCAACCCCTTACCCAGCGACCCCTCTAGAAAAAANCTGACCTTAAATTAATATATCCGACGCGCACTAATTTAATTAACATTCGCGCCACGAACT 7703
Gorilla_gorilla : GACTGTCGCCCCAATAAATCATAGAGCCAGCAACCCCTTACCCAGCGACCCCTCTAGAAAAAANCTGACCTTAAATTAATATATCCGACGCGCACTAATTTAATTAACATTCGCGCCACGAACT 7709
Homo_sapiens   : GACTGTCGCCCCAATAAATCATAGAGCCAGCAACCCCTTACCCAGCGACCCCTCTAGAAAAAANCTGACCTTAAATTAATATATCCGACGCGCACTAATTTAATTAACATTCGCGCCACGAACT 7700
Papio_hamadryas : GACTGTCGCCCCAATAAATCATAGAGCCAGCAACCCCTTACCCAGCGACCCCTCTAGAAAAAANCTGACCTTAAATTAATATATCCGACGCGCACTAATTTAATTAACATTCGCGCCACGAACT 7709
Cebus_albifrons : GACTACTGCGCCGATAAATATAGAGCCAGCAACCCCTTACCCAGCGACCCCTCTAGAAAAAANCTGACCTTAAATTAATATATCCGACGCGCACTAATTTAATTAACATTCGCGCCACGAACT 7703
Macaca_sylvanus : GACTGTCGCCCCAATAAATCATAGAGCCAGCAACCCCTTACCCAGCGACCCCTCTAGAAAAAANCTGACCTTAAATTAATATATCCGACGCGCACTAATTTAATTAACATTCGCGCCACGAACT 7706
Pongo_pygmaeus : GACTGTCGCCCCAATAAATCATAGAGCCAGCAACCCCTTACCCAGCGACCCCTCTAGAAAAAANCTGACCTTAAATTAATATATCCGACGCGCACTAATTTAATTAACATTCGCGCCACGAACT 7709
Pan_paniscus   : GACTGTCGCCCCAATAAATCATAGAGCCAGCAACCCCTTACCCAGCGACCCCTCTAGAAAAAANCTGACCTTAAATTAATATATCCGACGCGCACTAATTTAATTAACATTCGCGCCACGAACT 7709
Agkistrodon_piscivorus : GACTGTCGCCCCAATAAATCATAGAGCCAGCAACCCCTTACCCAGCGACCCCTCTAGAAAAAANCTGACCTTAAATTAATATATCCGACGCGCACTAATTTAATTAACATTCGCGCCACGAACT 7676
Pantherophis_guttatus : GACTGTCGCCCCAATAAATCATAGAGCCAGCAACCCCTTACCCAGCGACCCCTCTAGAAAAAANCTGACCTTAAATTAATATATCCGACGCGCACTAATTTAATTAACATTCGCGCCACGAACT 7676
Dinodon_semicarinatus : GACTGTCGCCCCAATAAATCATAGAGCCAGCAACCCCTTACCCAGCGACCCCTCTAGAAAAAANCTGACCTTAAATTAATATATCCGACGCGCACTAATTTAATTAACATTCGCGCCACGAACT 7676
Boa_constrictor : GACTGTCGCCCCAATAAATCATAGAGCCAGCAACCCCTTACCCAGCGACCCCTCTAGAAAAAANCTGACCTTAAATTAATATATCCGACGCGCACTAATTTAATTAACATTCGCGCCACGAACT 7703
Python_regius  : GACTGTCGCCCCAATAAATCATAGAGCCAGCAACCCCTTACCCAGCGACCCCTCTAGAAAAAANCTGACCTTAAATTAATATATCCGACGCGCACTAATTTAATTAACATTCGCGCCACGAACT 7700
Acrochordus_granulatus : GACTGTCGCCCCAATAAATCATAGAGCCAGCAACCCCTTACCCAGCGACCCCTCTAGAAAAAANCTGACCTTAAATTAATATATCCGACGCGCACTAATTTAATTAACATTCGCGCCACGAACT 7697
Chelonepheidiformes : GACTGTCGCCCCAATAAATCATAGAGCCAGCAACCCCTTACCCAGCGACCCCTCTAGAAAAAANCTGACCTTAAATTAATATATCCGACGCGCACTAATTTAATTAACATTCGCGCCACGAACT 7667
Ovophis_okinavensis : GACTGTCGCCCCAATAAATCATAGAGCCAGCAACCCCTTACCCAGCGACCCCTCTAGAAAAAANCTGACCTTAAATTAATATATCCGACGCGCACTAATTTAATTAACATTCGCGCCACGAACT 7676
Xenopeltis_unicolor : GACTGTCGCCCCAATAAATCATAGAGCCAGCAACCCCTTACCCAGCGACCCCTCTAGAAAAAANCTGACCTTAAATTAATATATCCGACGCGCACTAATTTAATTAACATTCGCGCCACGAACT 7706
Typhlops_reticulatus : GACTGTCGCCCCAATAAATCATAGAGCCAGCAACCCCTTACCCAGCGACCCCTCTAGAAAAAANCTGACCTTAAATTAATATATCCGACGCGCACTAATTTAATTAACATTCGCGCCACGAACT 7634
Leptotyphlops_dulcis : GACTGTCGCCCCAATAAATCATAGAGCCAGCAACCCCTTACCCAGCGACCCCTCTAGAAAAAANCTGACCTTAAATTAATATATCCGACGCGCACTAATTTAATTAACATTCGCGCCACGAACT 7647
Caiman_crocodilus : GACTGTCGCCCCAATAAATCATAGAGCCAGCAACCCCTTACCCAGCGACCCCTCTAGAAAAAANCTGACCTTAAATTAATATATCCGACGCGCACTAATTTAATTAACATTCGCGCCACGAACT 7745
Alligator_sinensis : GACTGTCGCCCCAATAAATCATAGAGCCAGCAACCCCTTACCCAGCGACCCCTCTAGAAAAAANCTGACCTTAAATTAATATATCCGACGCGCACTAATTTAATTAACATTCGCGCCACGAACT 7781
Alligator_mississippiensis : GACTGTCGCCCCAATAAATCATAGAGCCAGCAACCCCTTACCCAGCGACCCCTCTAGAAAAAANCTGACCTTAAATTAATATATCCGACGCGCACTAATTTAATTAACATTCGCGCCACGAACT 7727
Gavialis_gangeticus : GACTGTCGCCCCAATAAATCATAGAGCCAGCAACCCCTTACCCAGCGACCCCTCTAGAAAAAANCTGACCTTAAATTAATATATCCGACGCGCACTAATTTAATTAACATTCGCGCCACGAACT 7755
Crocodylus_moreletii : GACTGTCGCCCCAATAAATCATAGAGCCAGCAACCCCTTACCCAGCGACCCCTCTAGAAAAAANCTGACCTTAAATTAATATATCCGACGCGCACTAATTTAATTAACATTCGCGCCACGAACT 7731
Dogania_subplana : GACTGTCGCCCCAATAAATCATAGAGCCAGCAACCCCTTACCCAGCGACCCCTCTAGAAAAAANCTGACCTTAAATTAATATATCCGACGCGCACTAATTTAATTAACATTCGCGCCACGAACT 7673
Pelomedusa_subrufa : GACTGTCGCCCCAATAAATCATAGAGCCAGCAACCCCTTACCCAGCGACCCCTCTAGAAAAAANCTGACCTTAAATTAATATATCCGACGCGCACTAATTTAATTAACATTCGCGCCACGAACT 7700
Chrysemys_picta : GACTGTCGCCCCAATAAATCATAGAGCCAGCAACCCCTTACCCAGCGACCCCTCTAGAAAAAANCTGACCTTAAATTAATATATCCGACGCGCACTAATTTAATTAACATTCGCGCCACGAACT 7718
Chelonia_mydas : GACTGTCGCCCCAATAAATCATAGAGCCAGCAACCCCTTACCCAGCGACCCCTCTAGAAAAAANCTGACCTTAAATTAATATATCCGACGCGCACTAATTTAATTAACATTCGCGCCACGAACT 7721
Tinamus_major : GACTGTCGCCCCAATAAATCATAGAGCCAGCAACCCCTTACCCAGCGACCCCTCTAGAAAAAANCTGACCTTAAATTAATATATCCGACGCGCACTAATTTAATTAACATTCGCGCCACGAACT 7694
Smithornis_sharpei : GACTGTCGCCCCAATAAATCATAGAGCCAGCAACCCCTTACCCAGCGACCCCTCTAGAAAAAANCTGACCTTAAATTAATATATCCGACGCGCACTAATTTAATTAACATTCGCGCCACGAACT 7703
Corvus_frugilegus : GACTGTCGCCCCAATAAATCATAGAGCCAGCAACCCCTTACCCAGCGACCCCTCTAGAAAAAANCTGACCTTAAATTAATATATCCGACGCGCACTAATTTAATTAACATTCGCGCCACGAACT 7703
Vidua_chalybeata : GACTGTCGCCCCAATAAATCATAGAGCCAGCAACCCCTTACCCAGCGACCCCTCTAGAAAAAANCTGACCTTAAATTAATATATCCGACGCGCACTAATTTAATTAACATTCGCGCCACGAACT 7703
Buteo_buteo    : GACTGTCGCCCCAATAAATCATAGAGCCAGCAACCCCTTACCCAGCGACCCCTCTAGAAAAAANCTGACCTTAAATTAATATATCCGACGCGCACTAATTTAATTAACATTCGCGCCACGAACT 7700
Falco_peregrinus : GACTGTCGCCCCAATAAATCATAGAGCCAGCAACCCCTTACCCAGCGACCCCTCTAGAAAAAANCTGACCTTAAATTAATATATCCGACGCGCACTAATTTAATTAACATTCGCGCCACGAACT 7697
Dromaius_novaeollandiae : GACTGTCGCCCCAATAAATCATAGAGCCAGCAACCCCTTACCCAGCGACCCCTCTAGAAAAAANCTGACCTTAAATTAATATATCCGACGCGCACTAATTTAATTAACATTCGCGCCACGAACT 7703
Struthio_camelus : GACTGTCGCCCCAATAAATCATAGAGCCAGCAACCCCTTACCCAGCGACCCCTCTAGAAAAAANCTGACCTTAAATTAATATATCCGACGCGCACTAATTTAATTAACATTCGCGCCACGAACT 7700
Apteryx_haastii : GACTGTCGCCCCAATAAATCATAGAGCCAGCAACCCCTTACCCAGCGACCCCTCTAGAAAAAANCTGACCTTAAATTAATATATCCGACGCGCACTAATTTAATTAACATTCGCGCCACGAACT 7703
Rhea_americanana : GACTGTCGCCCCAATAAATCATAGAGCCAGCAACCCCTTACCCAGCGACCCCTCTAGAAAAAANCTGACCTTAAATTAATATATCCGACGCGCACTAATTTAATTAACATTCGCGCCACGAACT 7697
Gallus_gallus : GACTGTCGCCCCAATAAATCATAGAGCCAGCAACCCCTTACCCAGCGACCCCTCTAGAAAAAANCTGACCTTAAATTAATATATCCGACGCGCACTAATTTAATTAACATTCGCGCCACGAACT 7703
Ciconia_ciconia : GACTGTCGCCCCAATAAATCATAGAGCCAGCAACCCCTTACCCAGCGACCCCTCTAGAAAAAANCTGACCTTAAATTAATATATCCGACGCGCACTAATTTAATTAACATTCGCGCCACGAACT 7703
Ciconia_boyciana : GACTGTCGCCCCAATAAATCATAGAGCCAGCAACCCCTTACCCAGCGACCCCTCTAGAAAAAANCTGACCTTAAATTAATATATCCGACGCGCACTAATTTAATTAACATTCGCGCCACGAACT 7703
Iguana_iguana : GACTGTCGCCCCAATAAATCATAGAGCCAGCAACCCCTTACCCAGCGACCCCTCTAGAAAAAANCTGACCTTAAATTAATATATCCGACGCGCACTAATTTAATTAACATTCGCGCCACGAACT 7688
Fumeces_egregius : GACTGTCGCCCCAATAAATCATAGAGCCAGCAACCCCTTACCCAGCGACCCCTCTAGAAAAAANCTGACCTTAAATTAATATATCCGACGCGCACTAATTTAATTAACATTCGCGCCACGAACT 7688
Sphenodon_punctatus : GACTGTCGCCCCAATAAATCATAGAGCCAGCAACCCCTTACCCAGCGACCCCTCTAGAAAAAANCTGACCTTAAATTAATATATCCGACGCGCACTAATTTAATTAACATTCGCGCCACGAACT 7697
Sceloporus_occidentalis : GACTGTCGCCCCAATAAATCATAGAGCCAGCAACCCCTTACCCAGCGACCCCTCTAGAAAAAANCTGACCTTAAATTAATATATCCGACGCGCACTAATTTAATTAACATTCGCGCCACGAACT 7688
Cordylus_warreni : GACTGTCGCCCCAATAAATCATAGAGCCAGCAACCCCTTACCCAGCGACCCCTCTAGAAAAAANCTGACCTTAAATTAATATATCCGACGCGCACTAATTTAATTAACATTCGCGCCACGAACT 7691
Abronia_graminea : GACTGTCGCCCCAATAAATCATAGAGCCAGCAACCCCTTACCCAGCGACCCCTCTAGAAAAAANCTGACCTTAAATTAATATATCCGACGCGCACTAATTTAATTAACATTCGCGCCACGAACT 7679
Shinisaurus_crocodilurus : GACTGTCGCCCCAATAAATCATAGAGCCAGCAACCCCTTACCCAGCGACCCCTCTAGAAAAAANCTGACCTTAAATTAATATATCCGACGCGCACTAATTTAATTAACATTCGCGCCACGAACT 7733
Varanus_komodoensis : GACTGTCGCCCCAATAAATCATAGAGCCAGCAACCCCTTACCCAGCGACCCCTCTAGAAAAAANCTGACCTTAAATTAATATATCCGACGCGCACTAATTTAATTAACATTCGCGCCACGAACT 7670
Rhinura_floridana : GACTGTCGCCCCAATAAATCATAGAGCCAGCAACCCCTTACCCAGCGACCCCTCTAGAAAAAANCTGACCTTAAATTAATATATCCGACGCGCACTAATTTAATTAACATTCGCGCCACGAACT 7664
Geocalamus_acutus : GACTGTCGCCCCAATAAATCATAGAGCCAGCAACCCCTTACCCAGCGACCCCTCTAGAAAAAANCTGACCTTAAATTAATATATCCGACGCGCACTAATTTAATTAACATTCGCGCCACGAACT 7676
Diplometopon_zarudnyi : GACTGTCGCCCCAATAAATCATAGAGCCAGCAACCCCTTACCCAGCGACCCCTCTAGAAAAAANCTGACCTTAAATTAATATATCCGACGCGCACTAATTTAATTAACATTCGCGCCACGAACT 7673
Amphisbaena_schmidti : GACTGTCGCCCCAATAAATCATAGAGCCAGCAACCCCTTACCCAGCGACCCCTCTAGAAAAAANCTGACCTTAAATTAATATATCCGACGCGCACTAATTTAATTAACATTCGCGCCACGAACT 7664
Bipes_tridactylus : GACTGTCGCCCCAATAAATCATAGAGCCAGCAACCCCTTACCCAGCGACCCCTCTAGAAAAAANCTGACCTTAAATTAATATATCCGACGCGCACTAATTTAATTAACATTCGCGCCACGAACT 7676
Bipes_camaliculatus : GACTGTCGCCCCAATAAATCATAGAGCCAGCAACCCCTTACCCAGCGACCCCTCTAGAAAAAANCTGACCTTAAATTAATATATCCGACGCGCACTAATTTAATTAACATTCGCGCCACGAACT 7718
Bipes_biporus : GACTGTCGCCCCAATAAATCATAGAGCCAGCAACCCCTTACCCAGCGACCCCTCTAGAAAAAANCTGACCTTAAATTAATATATCCGACGCGCACTAATTTAATTAACATTCGCGCCACGAACT 7357
Anolis_carolinensis : GACTGTCGCCCCAATAAATCATAGAGCCAGCAACCCCTTACCCAGCGACCCCTCTAGAAAAAANCTGACCTTAAATTAATATATCCGACGCGCACTAATTTAATTAACATTCGCGCCACGAACT 7312
Ophisaurus_atnuatus : GACTGTCGCCCCAATAAATCATAGAGCCAGCAACCCCTTACCCAGCGACCCCTCTAGAAAAAANCTGACCTTAAATTAATATATCCGACGCGCACTAATTTAATTAACATTCGCGCCACGAACT 7725
Varanus_salvator : GACTGTCGCCCCAATAAATCATAGAGCCAGCAACCCCTTACCCAGCGACCCCTCTAGAAAAAANCTGACCTTAAATTAATATATCCGACGCGCACTAATTTAATTAACATTCGCGCCACGAACT 7706
Mertensiella_luschani : GACTGTCGCCCCAATAAATCATAGAGCCAGCAACCCCTTACCCAGCGACCCCTCTAGAAAAAANCTGACCTTAAATTAATATATCCGACGCGCACTAATTTAATTAACATTCGCGCCACGAACT 7691
Xenopus_laevis : GACTGTCGCCCCAATAAATCATAGAGCCAGCAACCCCTTACCCAGCGACCCCTCTAGAAAAAANCTGACCTTAAATTAATATATCCGACGCGCACTAATTTAATTAACATTCGCGCCACGAACT

```

|                            | * | 8260 | *    | 8280 | *   | 8300 | *   | 8320 | *   | 8340 | *   | 8360 | *   | 838 |      |
|----------------------------|---|------|------|------|-----|------|-----|------|-----|------|-----|------|-----|-----|------|
| Bos_taurus                 | : | AAT  | GAAG | GAAG | GGG | GGG  | GGG | GGG  | GGG | GGG  | GGG | GGG  | GGG | GGG | 8733 |
| Hylobates_lar              | : | AAT  | GAAG | GAAG | GGG | GGG  | GGG | GGG  | GGG | GGG  | GGG | GGG  | GGG | GGG | 8742 |
| Lemur_catta                | : | AAT  | GAAG | GAAG | GGG | GGG  | GGG | GGG  | GGG | GGG  | GGG | GGG  | GGG | GGG | 8739 |
| Nycticebus_coucang         | : | GA   | GAAG | GAAG | GGG | GGG  | GGG | GGG  | GGG | GGG  | GGG | GGG  | GGG | GGG | 8733 |
| Tarsius_bancanus           | : | GG   | GAAG | GAAG | GGG | GGG  | GGG | GGG  | GGG | GGG  | GGG | GGG  | GGG | GGG | 8736 |
| Gorilla_gorilla            | : | AAT  | GAAG | GAAG | GGG | GGG  | GGG | GGG  | GGG | GGG  | GGG | GGG  | GGG | GGG | 8742 |
| Homo_sapiens               | : | AAT  | GAAG | GAAG | GGG | GGG  | GGG | GGG  | GGG | GGG  | GGG | GGG  | GGG | GGG | 8733 |
| Papio_hamadryas            | : | AAT  | GAAG | GAAG | GGG | GGG  | GGG | GGG  | GGG | GGG  | GGG | GGG  | GGG | GGG | 8742 |
| Cebus_albifrons            | : | AAT  | GAAG | GAAG | GGG | GGG  | GGG | GGG  | GGG | GGG  | GGG | GGG  | GGG | GGG | 8736 |
| Macaca_sylvanus            | : | AAT  | GAAG | GAAG | GGG | GGG  | GGG | GGG  | GGG | GGG  | GGG | GGG  | GGG | GGG | 8739 |
| Pongo_pygmaeus             | : | AAT  | GAAG | GAAG | GGG | GGG  | GGG | GGG  | GGG | GGG  | GGG | GGG  | GGG | GGG | 8742 |
| Pan_paniscus               | : | AAT  | GAAG | GAAG | GGG | GGG  | GGG | GGG  | GGG | GGG  | GGG | GGG  | GGG | GGG | 8742 |
| Agkistrodon_piscivorus     | : | TA   | GAAG | GAAG | GGG | GGG  | GGG | GGG  | GGG | GGG  | GGG | GGG  | GGG | GGG | 8709 |
| Pantherophis_guttatus      | : | AA   | GAAG | GAAG | GGG | GGG  | GGG | GGG  | GGG | GGG  | GGG | GGG  | GGG | GGG | 8709 |
| Dinodon_semicarinatus      | : | GA   | GAAG | GAAG | GGG | GGG  | GGG | GGG  | GGG | GGG  | GGG | GGG  | GGG | GGG | 8709 |
| Boa_constrictor            | : | AA   | GAAG | GAAG | GGG | GGG  | GGG | GGG  | GGG | GGG  | GGG | GGG  | GGG | GGG | 8736 |
| Python_regius              | : | AA   | GAAG | GAAG | GGG | GGG  | GGG | GGG  | GGG | GGG  | GGG | GGG  | GGG | GGG | 8733 |
| Acrochordus_granulatus     | : | AA   | GAAG | GAAG | GGG | GGG  | GGG | GGG  | GGG | GGG  | GGG | GGG  | GGG | GGG | 8730 |
| Cylindrophis_ruffus        | : | AA   | GAAG | GAAG | GGG | GGG  | GGG | GGG  | GGG | GGG  | GGG | GGG  | GGG | GGG | 8700 |
| Ovophis_okinavensis        | : | AA   | GAAG | GAAG | GGG | GGG  | GGG | GGG  | GGG | GGG  | GGG | GGG  | GGG | GGG | 8709 |
| Xenopeltis_unicolor        | : | AA   | GAAG | GAAG | GGG | GGG  | GGG | GGG  | GGG | GGG  | GGG | GGG  | GGG | GGG | 8739 |
| Typhlops_reticulatus       | : | GA   | GAAG | GAAG | GGG | GGG  | GGG | GGG  | GGG | GGG  | GGG | GGG  | GGG | GGG | 7767 |
| Leptotyphlops_dulcis       | : | AA   | GAAG | GAAG | GGG | GGG  | GGG | GGG  | GGG | GGG  | GGG | GGG  | GGG | GGG | 7780 |
| Caiman_crocodilus          | : | AA   | GAAG | GAAG | GGG | GGG  | GGG | GGG  | GGG | GGG  | GGG | GGG  | GGG | GGG | 7878 |
| Alligator_sinensis         | : | AA   | GAAG | GAAG | GGG | GGG  | GGG | GGG  | GGG | GGG  | GGG | GGG  | GGG | GGG | 7914 |
| Alligator_mississippiensis | : | GA   | GAAG | GAAG | GGG | GGG  | GGG | GGG  | GGG | GGG  | GGG | GGG  | GGG | GGG | 7860 |
| Gavialis_gangeticus        | : | AA   | GAAG | GAAG | GGG | GGG  | GGG | GGG  | GGG | GGG  | GGG | GGG  | GGG | GGG | 7888 |
| Crocodylus_moreletii       | : | AA   | GAAG | GAAG | GGG | GGG  | GGG | GGG  | GGG | GGG  | GGG | GGG  | GGG | GGG | 7864 |
| Dogania_subplana           | : | AA   | GAAG | GAAG | GGG | GGG  | GGG | GGG  | GGG | GGG  | GGG | GGG  | GGG | GGG | 7806 |
| Pelomedusa_subrufa         | : | AA   | GAAG | GAAG | GGG | GGG  | GGG | GGG  | GGG | GGG  | GGG | GGG  | GGG | GGG | 7833 |
| Chrysemys_picta            | : | AA   | GAAG | GAAG | GGG | GGG  | GGG | GGG  | GGG | GGG  | GGG | GGG  | GGG | GGG | 7851 |
| Chelonia_mydas             | : | AA   | GAAG | GAAG | GGG | GGG  | GGG | GGG  | GGG | GGG  | GGG | GGG  | GGG | GGG | 7854 |
| Tinamus_major              | : | AA   | GAAG | GAAG | GGG | GGG  | GGG | GGG  | GGG | GGG  | GGG | GGG  | GGG | GGG | 7827 |
| Smithornis_sharpei         | : | GA   | GAAG | GAAG | GGG | GGG  | GGG | GGG  | GGG | GGG  | GGG | GGG  | GGG | GGG | 7836 |
| Corvus_frugilegus          | : | AA   | GAAG | GAAG | GGG | GGG  | GGG | GGG  | GGG | GGG  | GGG | GGG  | GGG | GGG | 7836 |
| Vidua_chalybeata           | : | AA   | GAAG | GAAG | GGG | GGG  | GGG | GGG  | GGG | GGG  | GGG | GGG  | GGG | GGG | 7836 |
| Buteo_buteo                | : | AA   | GAAG | GAAG | GGG | GGG  | GGG | GGG  | GGG | GGG  | GGG | GGG  | GGG | GGG | 7836 |
| Falco_peregrinus           | : | AA   | GAAG | GAAG | GGG | GGG  | GGG | GGG  | GGG | GGG  | GGG | GGG  | GGG | GGG | 7833 |
| Dromaius_novaeollandiae    | : | AA   | GAAG | GAAG | GGG | GGG  | GGG | GGG  | GGG | GGG  | GGG | GGG  | GGG | GGG | 7830 |
| Struthio_camelus           | : | AA   | GAAG | GAAG | GGG | GGG  | GGG | GGG  | GGG | GGG  | GGG | GGG  | GGG | GGG | 7836 |
| Apteryx_haastii            | : | AA   | GAAG | GAAG | GGG | GGG  | GGG | GGG  | GGG | GGG  | GGG | GGG  | GGG | GGG | 7833 |
| Rhea_americanana           | : | AA   | GAAG | GAAG | GGG | GGG  | GGG | GGG  | GGG | GGG  | GGG | GGG  | GGG | GGG | 7836 |
| Gallus_gallus              | : | AA   | GAAG | GAAG | GGG | GGG  | GGG | GGG  | GGG | GGG  | GGG | GGG  | GGG | GGG | 7830 |
| Ciconia_ciconia            | : | AA   | GAAG | GAAG | GGG | GGG  | GGG | GGG  | GGG | GGG  | GGG | GGG  | GGG | GGG | 7836 |
| Ciconia_boyciana           | : | AA   | GAAG | GAAG | GGG | GGG  | GGG | GGG  | GGG | GGG  | GGG | GGG  | GGG | GGG | 7836 |
| Iguana_iguana              | : | AA   | GAAG | GAAG | GGG | GGG  | GGG | GGG  | GGG | GGG  | GGG | GGG  | GGG | GGG | 7821 |
| Eumeces_egregius           | : | AA   | GAAG | GAAG | GGG | GGG  | GGG | GGG  | GGG | GGG  | GGG | GGG  | GGG | GGG | 7821 |
| Sphenodon_punctatus        | : | GG   | GAAG | GAAG | GGG | GGG  | GGG | GGG  | GGG | GGG  | GGG | GGG  | GGG | GGG | 7830 |
| Sceloporus_occidentalis    | : | AA   | GAAG | GAAG | GGG | GGG  | GGG | GGG  | GGG | GGG  | GGG | GGG  | GGG | GGG | 7821 |
| Cordylus_warreni           | : | AA   | GAAG | GAAG | GGG | GGG  | GGG | GGG  | GGG | GGG  | GGG | GGG  | GGG | GGG | 7824 |
| Abronia_graminea           | : | AA   | GAAG | GAAG | GGG | GGG  | GGG | GGG  | GGG | GGG  | GGG | GGG  | GGG | GGG | 7824 |
| Shinisaurus_crocodilurus   | : | AA   | GAAG | GAAG | GGG | GGG  | GGG | GGG  | GGG | GGG  | GGG | GGG  | GGG | GGG | 7812 |
| Varanus_komodoensis        | : | AA   | GAAG | GAAG | GGG | GGG  | GGG | GGG  | GGG | GGG  | GGG | GGG  | GGG | GGG | 7866 |
| Rhineura_floridana         | : | AA   | GAAG | GAAG | GGG | GGG  | GGG | GGG  | GGG | GGG  | GGG | GGG  | GGG | GGG | 7803 |
| Geocalamus_acutus          | : | AA   | GAAG | GAAG | GGG | GGG  | GGG | GGG  | GGG | GGG  | GGG | GGG  | GGG | GGG | 7797 |
| Diplometopon_zarudnyi      | : | AA   | GAAG | GAAG | GGG | GGG  | GGG | GGG  | GGG | GGG  | GGG | GGG  | GGG | GGG | 7809 |
| Amphisbaena_schmidti       | : | AA   | GAAG | GAAG | GGG | GGG  | GGG | GGG  | GGG | GGG  | GGG | GGG  | GGG | GGG | 7806 |
| Bipes_tridactylus          | : | AA   | GAAG | GAAG | GGG | GGG  | GGG | GGG  | GGG | GGG  | GGG | GGG  | GGG | GGG | 7797 |
| Bipes_canaliculatus        | : | AA   | GAAG | GAAG | GGG | GGG  | GGG | GGG  | GGG | GGG  | GGG | GGG  | GGG | GGG | 7809 |
| Bipes_biporus              | : | AA   | GAAG | GAAG | GGG | GGG  | GGG | GGG  | GGG | GGG  | GGG | GGG  | GGG | GGG | 7851 |
| Anolis_carolinensis        | : | AA   | GAAG | GAAG | GGG | GGG  | GGG | GGG  | GGG | GGG  | GGG | GGG  | GGG | GGG | 7490 |
| Ophisaurus_atnuatus        | : | AA   | GAAG | GAAG | GGG | GGG  | GGG | GGG  | GGG | GGG  | GGG | GGG  | GGG | GGG | 7445 |
| Varanus_salvator           | : | AA   | GAAG | GAAG | GGG | GGG  | GGG | GGG  | GGG | GGG  | GGG | GGG  | GGG | GGG | 7857 |
| Mertensiella_luschani      | : | AA   | GAAG | GAAG | GGG | GGG  | GGG | GGG  | GGG | GGG  | GGG | GGG  | GGG | GGG | 7839 |
| Xenopus_laevis             | : | AA   | GAAG | GAAG | GGG | GGG  | GGG | GGG  | GGG | GGG  | GGG | GGG  | GGG | GGG | 7824 |

0 \* 8400 \* 8420 \* 8440 \* 8460 \* 8480 \* 8500 \*
Bos\_taurus :
Hylobates\_lar :
Lemur\_catta :
Nycticebus\_coucang :
Tarsius\_bancanus :
Gorilla\_gorilla :
Homo\_sapiens :
Papio\_hamadryas :
Cebus\_albifrons :
Macaca\_sylvanus :
Pongo\_pygmaeus :
Pan\_paniscus :
Agkistrodon\_piscivorus :
Pantherophis\_guttatus :
Dinodon\_semicarinatus :
Boa\_constrictor :
Python\_regius :
Acrochordus\_granulatus :
Cylindrophis\_ruffus :
Xenopeltis\_unicolor :
Typhlops\_reticulatus :
Leptotyphlops\_dulcis :
Caiman\_crocodilus :
Alligator\_sinensis :
Alligator\_mississippiensis :
Gavialis\_gangeticus :
Crocodylus\_moreletii :
Dogania\_subplana :
Pelomedusa\_subrufa :
Chrysemys\_picta :
Chelonia\_mydas :
Tinamus\_major :
Smithornis\_sharpei :
Corvus\_frugilegus :
Vidua\_chalybeata :
Buteo\_buteo :
Falco\_peregrinus :
Dromaius\_novaeollandiae :
Struthio\_camelus :
Apteryx\_haastii :
Rhea\_american :
Gallus\_gallus :
Ciconia\_ciconia :
Ciconia\_boyciana :
Iguana\_iguana :
Eumeces\_egregius :
Sphenodon\_punctatus :
Sceloporus\_occidentalis :
Cordylus\_warreni :
Abronia\_graminea :
Shinisaurus\_crocodylurus :
Varanus\_komodoensis :
Rhinura\_floridana :
Geocalamus\_acutus :
Diplometopon\_zarudnyi :
Amphisbaena\_schmidti :
Bipes\_tridactylus :
Bipes\_canaliculatus :
Bipes\_biporus :
Anolis\_carolinensis :
Ophisaurus\_atnuatus :
Varanus\_salvator :
Mertensiella\_luschani :
Xenopus\_laevis

7960
7969
7966
7963
7963
7969
7960
7969
7963
7966
7969
7969
7969
7927
7927
7927
7954
7951
7948
7918
7927
7957
7888
7895
8005
8041
7987
8015
7991
7933
7960
7978
7981
7954
7963
7963
7963
7960
7957
7966
7963
7963
7963
7957
7966
7963
7948
7948
7957
7948
7951
7939
7993
7930
7924
7936
7921
7924
7936
7978
7617
7572
7984
7966
7951





|                            | 80  | * | 8800 | * | 8820 | * | 8840 | * | 8860 | * | 8880 | * | 8900 | * |      |
|----------------------------|-----|---|------|---|------|---|------|---|------|---|------|---|------|---|------|
| Bos_taurus                 | : G | A | A    | G | C    | C | A    | A | G    | G | G    | C | C    | A | 8353 |
| Hylobates_lar              | : G | T | A    | A | G    | C | C    | A | A    | G | G    | C | C    | A | 8362 |
| Lemur_catta                | : G | T | A    | A | G    | C | C    | A | A    | G | G    | C | C    | A | 8359 |
| Nycticebus_coucang         | : G | T | A    | A | G    | C | C    | A | A    | G | G    | C | C    | A | 8356 |
| Tarsius_bancanus           | : G | T | A    | A | G    | C | C    | A | A    | G | G    | C | C    | A | 8356 |
| Gorilla_gorilla            | : A | T | A    | A | G    | C | C    | A | A    | G | G    | C | C    | A | 8362 |
| Homo_sapiens               | : A | T | A    | A | G    | C | C    | A | A    | G | G    | C | C    | A | 8353 |
| Papio_hamadryas            | : G | T | A    | A | G    | C | C    | A | A    | G | G    | C | C    | A | 8362 |
| Cebus_albifrons            | : A | T | A    | A | G    | C | C    | A | A    | G | G    | C | C    | A | 8356 |
| Macaca_sylvanus            | : G | T | A    | A | G    | C | C    | A | A    | G | G    | C | C    | A | 8359 |
| Pongo_pygmaeus             | : G | T | A    | A | G    | C | C    | A | A    | G | G    | C | C    | A | 8362 |
| Pan_paniscus               | : G | T | A    | A | G    | C | C    | A | A    | G | G    | C | C    | A | 8362 |
| Agkistrodon_piscivorus     | : A | T | A    | A | G    | C | C    | A | A    | G | G    | C | C    | A | 8320 |
| Pantherophis_guttatus      | : A | T | A    | A | G    | C | C    | A | A    | G | G    | C | C    | A | 8320 |
| Dinodon_semicarinatus      | : G | T | A    | A | G    | C | C    | A | A    | G | G    | C | C    | A | 8320 |
| Boa_constrictor            | : A | T | A    | A | G    | C | C    | A | A    | G | G    | C | C    | A | 8347 |
| Python_regius              | : A | T | A    | A | G    | C | C    | A | A    | G | G    | C | C    | A | 8344 |
| Acrochordus_granulatus     | : G | T | A    | A | G    | C | C    | A | A    | G | G    | C | C    | A | 8341 |
| Cylindrophis_ruffus        | : A | T | A    | A | G    | C | C    | A | A    | G | G    | C | C    | A | 8311 |
| Ovophis_okinavensis        | : A | T | A    | A | G    | C | C    | A | A    | G | G    | C | C    | A | 8320 |
| Xenopeltis_unicolor        | : A | T | A    | A | G    | C | C    | A | A    | G | G    | C | C    | A | 8350 |
| Thylops_reticulatus        | : A | T | A    | A | G    | C | C    | A | A    | G | G    | C | C    | A | 8281 |
| Leptotyphlops_dulcis       | : A | T | A    | A | G    | C | C    | A | A    | G | G    | C | C    | A | 8288 |
| Caiman_crocodilus          | : A | T | A    | A | G    | C | C    | A | A    | G | G    | C | C    | A | 8398 |
| Alligator_sinensis         | : G | T | A    | A | G    | C | C    | A | A    | G | G    | C | C    | A | 8434 |
| Alligator_mississippiensis | : G | T | A    | A | G    | C | C    | A | A    | G | G    | C | C    | A | 8380 |
| Gavialis_gangeticus        | : G | T | A    | A | G    | C | C    | A | A    | G | G    | C | C    | A | 8408 |
| Crocodylus_moreletii       | : G | T | A    | A | G    | C | C    | A | A    | G | G    | C | C    | A | 8384 |
| Dogania_subplana           | : G | T | A    | A | G    | C | C    | A | A    | G | G    | C | C    | A | 8326 |
| Pelomedusa_subrufa         | : G | T | A    | A | G    | C | C    | A | A    | G | G    | C | C    | A | 8353 |
| Chrysemys_picta            | : G | T | A    | A | G    | C | C    | A | A    | G | G    | C | C    | A | 8371 |
| Chelonia_mydas             | : G | T | A    | A | G    | C | C    | A | A    | G | G    | C | C    | A | 8374 |
| Tinanus_major              | : G | T | A    | A | G    | C | C    | A | A    | G | G    | C | C    | A | 8347 |
| Smithornis_sharpei         | : G | T | A    | A | G    | C | C    | A | A    | G | G    | C | C    | A | 8356 |
| Corvus_frugilegus          | : G | T | A    | A | G    | C | C    | A | A    | G | G    | C | C    | A | 8356 |
| Vidua_chalybeata           | : G | T | A    | A | G    | C | C    | A | A    | G | G    | C | C    | A | 8356 |
| Buteo_buteo                | : G | T | A    | A | G    | C | C    | A | A    | G | G    | C | C    | A | 8353 |
| Falco_peregrinus           | : G | T | A    | A | G    | C | C    | A | A    | G | G    | C | C    | A | 8350 |
| Dromaius_novaeollandiae    | : G | T | A    | A | G    | C | C    | A | A    | G | G    | C | C    | A | 8356 |
| Struthio_camelus           | : G | T | A    | A | G    | C | C    | A | A    | G | G    | C | C    | A | 8353 |
| Apteryx_haastii            | : G | T | A    | A | G    | C | C    | A | A    | G | G    | C | C    | A | 8356 |
| Rhea_american              | : G | T | A    | A | G    | C | C    | A | A    | G | G    | C | C    | A | 8350 |
| Gallus_gallus              | : G | T | A    | A | G    | C | C    | A | A    | G | G    | C | C    | A | 8359 |
| Ciconia_ciconia            | : G | T | A    | A | G    | C | C    | A | A    | G | G    | C | C    | A | 8356 |
| Ciconia_boycinana          | : G | T | A    | A | G    | C | C    | A | A    | G | G    | C | C    | A | 8341 |
| Iguana_iguana              | : G | T | A    | A | G    | C | C    | A | A    | G | G    | C | C    | A | 8341 |
| Eumeces_egregius           | : G | T | A    | A | G    | C | C    | A | A    | G | G    | C | C    | A | 8350 |
| Sphenodon_punctatus        | : G | T | A    | A | G    | C | C    | A | A    | G | G    | C | C    | A | 8341 |
| Sceloporus_occidentalis    | : G | T | A    | A | G    | C | C    | A | A    | G | G    | C | C    | A | 8344 |
| Cordylus_warreni           | : G | T | A    | A | G    | C | C    | A | A    | G | G    | C | C    | A | 8344 |
| Abronia_graminea           | : G | T | A    | A | G    | C | C    | A | A    | G | G    | C | C    | A | 8332 |
| Shinisaurus_crocodilurus   | : G | T | A    | A | G    | C | C    | A | A    | G | G    | C | C    | A | 8386 |
| Varanus_komodoensis        | : G | T | A    | A | G    | C | C    | A | A    | G | G    | C | C    | A | 8323 |
| Rhineura_floridana         | : G | T | A    | A | G    | C | C    | A | A    | G | G    | C | C    | A | 8311 |
| Geocalamus_acutus          | : G | T | A    | A | G    | C | C    | A | A    | G | G    | C | C    | A | 8326 |
| Diplometopon_zarudnyi      | : G | T | A    | A | G    | C | C    | A | A    | G | G    | C | C    | A | 8311 |
| Amphisbaena_schmidti       | : G | T | A    | A | G    | C | C    | A | A    | G | G    | C | C    | A | 8317 |
| Bipes_tridactylus          | : G | T | A    | A | G    | C | C    | A | A    | G | G    | C | C    | A | 8329 |
| Bipes_capaliculatus        | : G | T | A    | A | G    | C | C    | A | A    | G | G    | C | C    | A | 8371 |
| Bipes_biparus              | : G | T | A    | A | G    | C | C    | A | A    | G | G    | C | C    | A | 8002 |
| Anolis_carolinensis        | : G | T | A    | A | G    | C | C    | A | A    | G | G    | C | C    | A | 7965 |
| Ophisaurus_atnuatus        | : G | T | A    | A | G    | C | C    | A | A    | G | G    | C | C    | A | 8377 |
| Varanus_salvator           | : G | T | A    | A | G    | C | C    | A | A    | G | G    | C | C    | A | 8359 |
| Mertensiella_luschani      | : G | T | A    | A | G    | C | C    | A | A    | G | G    | C | C    | A | 8350 |
| Xenopus_laevis             | : G | T | A    | A | G    | C | C    | A | A    | G | G    | C | C    | A |      |



|                            | 8920 | *           | 8940 | *       | 8960   | *         | 8980   | *     | 9000  | *       | 9020 | *   | 9040 |      |      |
|----------------------------|------|-------------|------|---------|--------|-----------|--------|-------|-------|---------|------|-----|------|------|------|
| Bos_taurus                 | :    | ACTAGGACGAA | CCAC | NGCCGAA | CAATAA | TGTCGAGGC | TAACAA | GGTCC | CTAAT | AGCCACC | GATG | CTC | AGC  | AAAG | 8486 |
| Hylobates_lar              | :    | ACTAGGACGAA | CCAC | NGCCGAA | CAATAA | TGTCGAGGC | TAACAA | GGTCC | CTAAT | AGCCACC | GATG | CTC | AGC  | AAAG | 8495 |
| Lemur_catta                | :    | ACTAGGACGAA | CCAC | NGCCGAA | CAATAA | TGTCGAGGC | TAACAA | GGTCC | CTAAT | AGCCACC | GATG | CTC | AGC  | AAAG | 8492 |
| Nycticebus_coucang         | :    | ACTAGGACGAA | CCAC | NGCCGAA | CAATAA | TGTCGAGGC | TAACAA | GGTCC | CTAAT | AGCCACC | GATG | CTC | AGC  | AAAG | 8489 |
| Tarsius_bancanus           | :    | ACTAGGACGAA | CCAC | NGCCGAA | CAATAA | TGTCGAGGC | TAACAA | GGTCC | CTAAT | AGCCACC | GATG | CTC | AGC  | AAAG | 8489 |
| Gorilla_gorilla            | :    | ACTAGGACGAA | CCAC | NGCCGAA | CAATAA | TGTCGAGGC | TAACAA | GGTCC | CTAAT | AGCCACC | GATG | CTC | AGC  | AAAG | 8495 |
| Homo_sapiens               | :    | ACTAGGACGAA | CCAC | NGCCGAA | CAATAA | TGTCGAGGC | TAACAA | GGTCC | CTAAT | AGCCACC | GATG | CTC | AGC  | AAAG | 8486 |
| Papio_hamadryas            | :    | ACTAGGACGAA | CCAC | NGCCGAA | CAATAA | TGTCGAGGC | TAACAA | GGTCC | CTAAT | AGCCACC | GATG | CTC | AGC  | AAAG | 8495 |
| Cebus_albifrons            | :    | ACTAGGACGAA | CCAC | NGCCGAA | CAATAA | TGTCGAGGC | TAACAA | GGTCC | CTAAT | AGCCACC | GATG | CTC | AGC  | AAAG | 8489 |
| Macaca_sylvanus            | :    | ACTAGGACGAA | CCAC | NGCCGAA | CAATAA | TGTCGAGGC | TAACAA | GGTCC | CTAAT | AGCCACC | GATG | CTC | AGC  | AAAG | 8492 |
| Pongo_pygmaeus             | :    | ACTAGGACGAA | CCAC | NGCCGAA | CAATAA | TGTCGAGGC | TAACAA | GGTCC | CTAAT | AGCCACC | GATG | CTC | AGC  | AAAG | 8495 |
| Pan_paniscus               | :    | ACTAGGACGAA | CCAC | NGCCGAA | CAATAA | TGTCGAGGC | TAACAA | GGTCC | CTAAT | AGCCACC | GATG | CTC | AGC  | AAAG | 8495 |
| Agkistrodon_piscivorus     | :    | ACTAGGACGAA | CCAC | NGCCGAA | CAATAA | TGTCGAGGC | TAACAA | GGTCC | CTAAT | AGCCACC | GATG | CTC | AGC  | AAAG | 8453 |
| Pantherophis_guttatus      | :    | ACTAGGACGAA | CCAC | NGCCGAA | CAATAA | TGTCGAGGC | TAACAA | GGTCC | CTAAT | AGCCACC | GATG | CTC | AGC  | AAAG | 8453 |
| Dinodon_semicarinatus      | :    | ACTAGGACGAA | CCAC | NGCCGAA | CAATAA | TGTCGAGGC | TAACAA | GGTCC | CTAAT | AGCCACC | GATG | CTC | AGC  | AAAG | 8453 |
| Boa_constrictor            | :    | ACTAGGACGAA | CCAC | NGCCGAA | CAATAA | TGTCGAGGC | TAACAA | GGTCC | CTAAT | AGCCACC | GATG | CTC | AGC  | AAAG | 8480 |
| Python_regius              | :    | ACTAGGACGAA | CCAC | NGCCGAA | CAATAA | TGTCGAGGC | TAACAA | GGTCC | CTAAT | AGCCACC | GATG | CTC | AGC  | AAAG | 8477 |
| Acrochordus_granulatus     | :    | ACTAGGACGAA | CCAC | NGCCGAA | CAATAA | TGTCGAGGC | TAACAA | GGTCC | CTAAT | AGCCACC | GATG | CTC | AGC  | AAAG | 8474 |
| Cylindrophis_ruffus        | :    | ACTAGGACGAA | CCAC | NGCCGAA | CAATAA | TGTCGAGGC | TAACAA | GGTCC | CTAAT | AGCCACC | GATG | CTC | AGC  | AAAG | 8444 |
| Ovophis_okinavensis        | :    | ACTAGGACGAA | CCAC | NGCCGAA | CAATAA | TGTCGAGGC | TAACAA | GGTCC | CTAAT | AGCCACC | GATG | CTC | AGC  | AAAG | 8453 |
| Xenopeltis_unicolor        | :    | ACTAGGACGAA | CCAC | NGCCGAA | CAATAA | TGTCGAGGC | TAACAA | GGTCC | CTAAT | AGCCACC | GATG | CTC | AGC  | AAAG | 8483 |
| Typhlops_reticulatus       | :    | ACTAGGACGAA | CCAC | NGCCGAA | CAATAA | TGTCGAGGC | TAACAA | GGTCC | CTAAT | AGCCACC | GATG | CTC | AGC  | AAAG | 8414 |
| Leptotyphlops_dulcis       | :    | ACTAGGACGAA | CCAC | NGCCGAA | CAATAA | TGTCGAGGC | TAACAA | GGTCC | CTAAT | AGCCACC | GATG | CTC | AGC  | AAAG | 8421 |
| Caiman_crocodilus          | :    | ACTAGGACGAA | CCAC | NGCCGAA | CAATAA | TGTCGAGGC | TAACAA | GGTCC | CTAAT | AGCCACC | GATG | CTC | AGC  | AAAG | 8531 |
| Alligator_sinensis         | :    | ACTAGGACGAA | CCAC | NGCCGAA | CAATAA | TGTCGAGGC | TAACAA | GGTCC | CTAAT | AGCCACC | GATG | CTC | AGC  | AAAG | 8567 |
| Alligator_mississippiensis | :    | ACTAGGACGAA | CCAC | NGCCGAA | CAATAA | TGTCGAGGC | TAACAA | GGTCC | CTAAT | AGCCACC | GATG | CTC | AGC  | AAAG | 8513 |
| Gavialis_gangeticus        | :    | ACTAGGACGAA | CCAC | NGCCGAA | CAATAA | TGTCGAGGC | TAACAA | GGTCC | CTAAT | AGCCACC | GATG | CTC | AGC  | AAAG | 8541 |
| Crocodylus_moreletii       | :    | ACTAGGACGAA | CCAC | NGCCGAA | CAATAA | TGTCGAGGC | TAACAA | GGTCC | CTAAT | AGCCACC | GATG | CTC | AGC  | AAAG | 8517 |
| Dogania_subplana           | :    | ACTAGGACGAA | CCAC | NGCCGAA | CAATAA | TGTCGAGGC | TAACAA | GGTCC | CTAAT | AGCCACC | GATG | CTC | AGC  | AAAG | 8459 |
| Pelomedusa_subrufa         | :    | ACTAGGACGAA | CCAC | NGCCGAA | CAATAA | TGTCGAGGC | TAACAA | GGTCC | CTAAT | AGCCACC | GATG | CTC | AGC  | AAAG | 8486 |
| Chrysemys_picta            | :    | ACTAGGACGAA | CCAC | NGCCGAA | CAATAA | TGTCGAGGC | TAACAA | GGTCC | CTAAT | AGCCACC | GATG | CTC | AGC  | AAAG | 8504 |
| Chelonia_mydas             | :    | ACTAGGACGAA | CCAC | NGCCGAA | CAATAA | TGTCGAGGC | TAACAA | GGTCC | CTAAT | AGCCACC | GATG | CTC | AGC  | AAAG | 8507 |
| Tinanus_major              | :    | ACTAGGACGAA | CCAC | NGCCGAA | CAATAA | TGTCGAGGC | TAACAA | GGTCC | CTAAT | AGCCACC | GATG | CTC | AGC  | AAAG | 8480 |
| Smithornis_sharpei         | :    | ACTAGGACGAA | CCAC | NGCCGAA | CAATAA | TGTCGAGGC | TAACAA | GGTCC | CTAAT | AGCCACC | GATG | CTC | AGC  | AAAG | 8489 |
| Corvus_frugilegus          | :    | ACTAGGACGAA | CCAC | NGCCGAA | CAATAA | TGTCGAGGC | TAACAA | GGTCC | CTAAT | AGCCACC | GATG | CTC | AGC  | AAAG | 8489 |
| Vidua_chalybeata           | :    | ACTAGGACGAA | CCAC | NGCCGAA | CAATAA | TGTCGAGGC | TAACAA | GGTCC | CTAAT | AGCCACC | GATG | CTC | AGC  | AAAG | 8489 |
| Buteo_buteo                | :    | ACTAGGACGAA | CCAC | NGCCGAA | CAATAA | TGTCGAGGC | TAACAA | GGTCC | CTAAT | AGCCACC | GATG | CTC | AGC  | AAAG | 8489 |
| Falco_peregrinus           | :    | ACTAGGACGAA | CCAC | NGCCGAA | CAATAA | TGTCGAGGC | TAACAA | GGTCC | CTAAT | AGCCACC | GATG | CTC | AGC  | AAAG | 8486 |
| Dromaius_novaeollandiae    | :    | ACTAGGACGAA | CCAC | NGCCGAA | CAATAA | TGTCGAGGC | TAACAA | GGTCC | CTAAT | AGCCACC | GATG | CTC | AGC  | AAAG | 8483 |
| Struthio_camelus           | :    | ACTAGGACGAA | CCAC | NGCCGAA | CAATAA | TGTCGAGGC | TAACAA | GGTCC | CTAAT | AGCCACC | GATG | CTC | AGC  | AAAG | 8489 |
| Apteryx_haastii            | :    | ACTAGGACGAA | CCAC | NGCCGAA | CAATAA | TGTCGAGGC | TAACAA | GGTCC | CTAAT | AGCCACC | GATG | CTC | AGC  | AAAG | 8486 |
| Rhea_american              | :    | ACTAGGACGAA | CCAC | NGCCGAA | CAATAA | TGTCGAGGC | TAACAA | GGTCC | CTAAT | AGCCACC | GATG | CTC | AGC  | AAAG | 8489 |
| Gallus_gallus              | :    | ACTAGGACGAA | CCAC | NGCCGAA | CAATAA | TGTCGAGGC | TAACAA | GGTCC | CTAAT | AGCCACC | GATG | CTC | AGC  | AAAG | 8483 |
| Ciconia_ciconia            | :    | ACTAGGACGAA | CCAC | NGCCGAA | CAATAA | TGTCGAGGC | TAACAA | GGTCC | CTAAT | AGCCACC | GATG | CTC | AGC  | AAAG | 8492 |
| Ciconia_boycciana          | :    | ACTAGGACGAA | CCAC | NGCCGAA | CAATAA | TGTCGAGGC | TAACAA | GGTCC | CTAAT | AGCCACC | GATG | CTC | AGC  | AAAG | 8489 |
| Iguana_iguana              | :    | ACTAGGACGAA | CCAC | NGCCGAA | CAATAA | TGTCGAGGC | TAACAA | GGTCC | CTAAT | AGCCACC | GATG | CTC | AGC  | AAAG | 8474 |
| Fumeces_egregius           | :    | ACTAGGACGAA | CCAC | NGCCGAA | CAATAA | TGTCGAGGC | TAACAA | GGTCC | CTAAT | AGCCACC | GATG | CTC | AGC  | AAAG | 8474 |
| Sphenodon_punctatus        | :    | ACTAGGACGAA | CCAC | NGCCGAA | CAATAA | TGTCGAGGC | TAACAA | GGTCC | CTAAT | AGCCACC | GATG | CTC | AGC  | AAAG | 8483 |
| Sceloporus_occidentalis    | :    | ACTAGGACGAA | CCAC | NGCCGAA | CAATAA | TGTCGAGGC | TAACAA | GGTCC | CTAAT | AGCCACC | GATG | CTC | AGC  | AAAG | 8474 |
| Cordylus_warreni           | :    | ACTAGGACGAA | CCAC | NGCCGAA | CAATAA | TGTCGAGGC | TAACAA | GGTCC | CTAAT | AGCCACC | GATG | CTC | AGC  | AAAG | 8477 |
| Abronia_graminea           | :    | ACTAGGACGAA | CCAC | NGCCGAA | CAATAA | TGTCGAGGC | TAACAA | GGTCC | CTAAT | AGCCACC | GATG | CTC | AGC  | AAAG | 8477 |
| Shinisaurus_crocodilurus   | :    | ACTAGGACGAA | CCAC | NGCCGAA | CAATAA | TGTCGAGGC | TAACAA | GGTCC | CTAAT | AGCCACC | GATG | CTC | AGC  | AAAG | 8465 |
| Varanus_komodoensis        | :    | ACTAGGACGAA | CCAC | NGCCGAA | CAATAA | TGTCGAGGC | TAACAA | GGTCC | CTAAT | AGCCACC | GATG | CTC | AGC  | AAAG | 8519 |
| Rhineura_floridana         | :    | ACTAGGACGAA | CCAC | NGCCGAA | CAATAA | TGTCGAGGC | TAACAA | GGTCC | CTAAT | AGCCACC | GATG | CTC | AGC  | AAAG | 8456 |
| Geocalamus_acutus          | :    | ACTAGGACGAA | CCAC | NGCCGAA | CAATAA | TGTCGAGGC | TAACAA | GGTCC | CTAAT | AGCCACC | GATG | CTC | AGC  | AAAG | 8444 |
| Diplometopon_zarudnyi      | :    | ACTAGGACGAA | CCAC | NGCCGAA | CAATAA | TGTCGAGGC | TAACAA | GGTCC | CTAAT | AGCCACC | GATG | CTC | AGC  | AAAG | 8459 |
| Amphisbaena_schmidti       | :    | ACTAGGACGAA | CCAC | NGCCGAA | CAATAA | TGTCGAGGC | TAACAA | GGTCC | CTAAT | AGCCACC | GATG | CTC | AGC  | AAAG | 8444 |
| Bipes_tridactylus          | :    | ACTAGGACGAA | CCAC | NGCCGAA | CAATAA | TGTCGAGGC | TAACAA | GGTCC | CTAAT | AGCCACC | GATG | CTC | AGC  | AAAG | 8450 |
| Bipes_canaliculatus        | :    | ACTAGGACGAA | CCAC | NGCCGAA | CAATAA | TGTCGAGGC | TAACAA | GGTCC | CTAAT | AGCCACC | GATG | CTC | AGC  | AAAG | 8462 |
| Bipes_biporus              | :    | ACTAGGACGAA | CCAC | NGCCGAA | CAATAA | TGTCGAGGC | TAACAA | GGTCC | CTAAT | AGCCACC | GATG | CTC | AGC  | AAAG | 8504 |
| Anolis_carolinensis        | :    | ACTAGGACGAA | CCAC | NGCCGAA | CAATAA | TGTCGAGGC | TAACAA | GGTCC | CTAAT | AGCCACC | GATG | CTC | AGC  | AAAG | 8132 |
| Ophisaurus_atnuatus        | :    | ACTAGGACGAA | CCAC | NGCCGAA | CAATAA | TGTCGAGGC | TAACAA | GGTCC | CTAAT | AGCCACC | GATG | CTC | AGC  | AAAG | 8098 |
| Varanus_salvator           | :    | ACTAGGACGAA | CCAC | NGCCGAA | CAATAA | TGTCGAGGC | TAACAA | GGTCC | CTAAT | AGCCACC | GATG | CTC | AGC  | AAAG | 8510 |
| Mertensiella_luschani      | :    | ACTAGGACGAA | CCAC | NGCCGAA | CAATAA | TGTCGAGGC | TAACAA | GGTCC | CTAAT | AGCCACC | GATG | CTC | AGC  | AAAG | 8492 |
| Xenopus_laevis             | :    | ACTAGGACGAA | CCAC | NGCCGAA | CAATAA | TGTCGAGGC | TAACAA | GGTCC | CTAAT | AGCCACC | GATG | CTC | AGC  | AAAG | 8483 |

```

*          9060          *          9080          *          9100          *          9120          *          9140          *          9160          *
Bos_taurus      : AGAATGATGAGAGAAAGCAACCTTTAAAGGCAAAATGAAATGAAAGGAGAAAATGAAAGAGCCGCTATATGATACAGCAATATAAGCCCAACGGGAAATAATCCG 8616
Hylobates_lar  : GGAATGAGAGAAAGCAACCTTTAAAGGCAAAATGAAATGAAAGGAGAAAATGAAAGAGCCGCTATATGATACAGCAATATAAGCCCAACGGGAAATAATCCG 8625
Lemur_catta    : GGAATGAGAGAAAGCAACCTTTAAAGGCAAAATGAAATGAAAGGAGAAAATGAAAGAGCCGCTATATGATACAGCAATATAAGCCCAACGGGAAATAATCCG 8622
Nycticebus_coucang : AGAATGAGAGAAAGCAACCTTTAAAGGCAAAATGAAATGAAAGGAGAAAATGAAAGAGCCGCTATATGATACAGCAATATAAGCCCAACGGGAAATAATCCG 8619
Tarsius_bancanus : GGAATGAGAGAAAGCAACCTTTAAAGGCAAAATGAAATGAAAGGAGAAAATGAAAGAGCCGCTATATGATACAGCAATATAAGCCCAACGGGAAATAATCCG 8619
Gorilla_gorilla : AGAATGAGAGAAAGCAACCTTTAAAGGCAAAATGAAATGAAAGGAGAAAATGAAAGAGCCGCTATATGATACAGCAATATAAGCCCAACGGGAAATAATCCG 8625
Homo_sapiens   : GGAATGAGAGAAAGCAACCTTTAAAGGCAAAATGAAATGAAAGGAGAAAATGAAAGAGCCGCTATATGATACAGCAATATAAGCCCAACGGGAAATAATCCG 8616
Papio_hamadryas : GGAATGAGAGAAAGCAACCTTTAAAGGCAAAATGAAATGAAAGGAGAAAATGAAAGAGCCGCTATATGATACAGCAATATAAGCCCAACGGGAAATAATCCG 8625
Cebus_albifrons : AGAATGAGAGAAAGCAACCTTTAAAGGCAAAATGAAATGAAAGGAGAAAATGAAAGAGCCGCTATATGATACAGCAATATAAGCCCAACGGGAAATAATCCG 8619
Macaca_sylvanus : GGAATGAGAGAAAGCAACCTTTAAAGGCAAAATGAAATGAAAGGAGAAAATGAAAGAGCCGCTATATGATACAGCAATATAAGCCCAACGGGAAATAATCCG 8622
Pongo_pygmaeus : AGAATGAGAGAAAGCAACCTTTAAAGGCAAAATGAAATGAAAGGAGAAAATGAAAGAGCCGCTATATGATACAGCAATATAAGCCCAACGGGAAATAATCCG 8625
Pan_paniscus   : GGAATGAGAGAAAGCAACCTTTAAAGGCAAAATGAAATGAAAGGAGAAAATGAAAGAGCCGCTATATGATACAGCAATATAAGCCCAACGGGAAATAATCCG 8625
Agkistrodon_piscivorus : GGAATGAGAGAAAGCAACCTTTAAAGGCAAAATGAAATGAAAGGAGAAAATGAAAGAGCCGCTATATGATACAGCAATATAAGCCCAACGGGAAATAATCCG 8619
Pantherophis_guttatus : GGAATGAGAGAAAGCAACCTTTAAAGGCAAAATGAAATGAAAGGAGAAAATGAAAGAGCCGCTATATGATACAGCAATATAAGCCCAACGGGAAATAATCCG 8619
Dinodon_semicarinatus : GGAATGAGAGAAAGCAACCTTTAAAGGCAAAATGAAATGAAAGGAGAAAATGAAAGAGCCGCTATATGATACAGCAATATAAGCCCAACGGGAAATAATCCG 8619
Boa_constrictor : GGAATGAGAGAAAGCAACCTTTAAAGGCAAAATGAAATGAAAGGAGAAAATGAAAGAGCCGCTATATGATACAGCAATATAAGCCCAACGGGAAATAATCCG 8607
Python_regius  : GGAATGAGAGAAAGCAACCTTTAAAGGCAAAATGAAATGAAAGGAGAAAATGAAAGAGCCGCTATATGATACAGCAATATAAGCCCAACGGGAAATAATCCG 8604
Acrochordus_granulatus : GGAATGAGAGAAAGCAACCTTTAAAGGCAAAATGAAATGAAAGGAGAAAATGAAAGAGCCGCTATATGATACAGCAATATAAGCCCAACGGGAAATAATCCG 8601
Cylindrophis_ruffus : GGAATGAGAGAAAGCAACCTTTAAAGGCAAAATGAAATGAAAGGAGAAAATGAAAGAGCCGCTATATGATACAGCAATATAAGCCCAACGGGAAATAATCCG 8619
Ovophis_okinavensis : GGAATGAGAGAAAGCAACCTTTAAAGGCAAAATGAAATGAAAGGAGAAAATGAAAGAGCCGCTATATGATACAGCAATATAAGCCCAACGGGAAATAATCCG 8619
Xenopeltis_unicolor : GGAATGAGAGAAAGCAACCTTTAAAGGCAAAATGAAATGAAAGGAGAAAATGAAAGAGCCGCTATATGATACAGCAATATAAGCCCAACGGGAAATAATCCG 8610
Typhlops_reticulatus : GGAATGAGAGAAAGCAACCTTTAAAGGCAAAATGAAATGAAAGGAGAAAATGAAAGAGCCGCTATATGATACAGCAATATAAGCCCAACGGGAAATAATCCG 8619
Leptotyphlops_dulcis : GGAATGAGAGAAAGCAACCTTTAAAGGCAAAATGAAATGAAAGGAGAAAATGAAAGAGCCGCTATATGATACAGCAATATAAGCCCAACGGGAAATAATCCG 8619
Caiman_crocodilus : GGAATGAGAGAAAGCAACCTTTAAAGGCAAAATGAAATGAAAGGAGAAAATGAAAGAGCCGCTATATGATACAGCAATATAAGCCCAACGGGAAATAATCCG 8619
Alligator_sinensis : GGAATGAGAGAAAGCAACCTTTAAAGGCAAAATGAAATGAAAGGAGAAAATGAAAGAGCCGCTATATGATACAGCAATATAAGCCCAACGGGAAATAATCCG 8619
Alligator_mississippiensis : GGAATGAGAGAAAGCAACCTTTAAAGGCAAAATGAAATGAAAGGAGAAAATGAAAGAGCCGCTATATGATACAGCAATATAAGCCCAACGGGAAATAATCCG 8619
Gavialis_gangeticus : GGAATGAGAGAAAGCAACCTTTAAAGGCAAAATGAAATGAAAGGAGAAAATGAAAGAGCCGCTATATGATACAGCAATATAAGCCCAACGGGAAATAATCCG 8619
Crocodilus_moreletii : GGAATGAGAGAAAGCAACCTTTAAAGGCAAAATGAAATGAAAGGAGAAAATGAAAGAGCCGCTATATGATACAGCAATATAAGCCCAACGGGAAATAATCCG 8619
Dogania_subplana : GGAATGAGAGAAAGCAACCTTTAAAGGCAAAATGAAATGAAAGGAGAAAATGAAAGAGCCGCTATATGATACAGCAATATAAGCCCAACGGGAAATAATCCG 8619
Pelomedusa_subrufa : GGAATGAGAGAAAGCAACCTTTAAAGGCAAAATGAAATGAAAGGAGAAAATGAAAGAGCCGCTATATGATACAGCAATATAAGCCCAACGGGAAATAATCCG 8619
Chrysemys_picta : GGAATGAGAGAAAGCAACCTTTAAAGGCAAAATGAAATGAAAGGAGAAAATGAAAGAGCCGCTATATGATACAGCAATATAAGCCCAACGGGAAATAATCCG 8619
Chelonia_mydas : GGAATGAGAGAAAGCAACCTTTAAAGGCAAAATGAAATGAAAGGAGAAAATGAAAGAGCCGCTATATGATACAGCAATATAAGCCCAACGGGAAATAATCCG 8619
Tinamus_major : GGAATGAGAGAAAGCAACCTTTAAAGGCAAAATGAAATGAAAGGAGAAAATGAAAGAGCCGCTATATGATACAGCAATATAAGCCCAACGGGAAATAATCCG 8619
Smithornis_sharpei : GGAATGAGAGAAAGCAACCTTTAAAGGCAAAATGAAATGAAAGGAGAAAATGAAAGAGCCGCTATATGATACAGCAATATAAGCCCAACGGGAAATAATCCG 8619
Corvus_frugilegus : GGAATGAGAGAAAGCAACCTTTAAAGGCAAAATGAAATGAAAGGAGAAAATGAAAGAGCCGCTATATGATACAGCAATATAAGCCCAACGGGAAATAATCCG 8619
Vidua_chalybeata : GGAATGAGAGAAAGCAACCTTTAAAGGCAAAATGAAATGAAAGGAGAAAATGAAAGAGCCGCTATATGATACAGCAATATAAGCCCAACGGGAAATAATCCG 8619
Buteo_buteo    : GGAATGAGAGAAAGCAACCTTTAAAGGCAAAATGAAATGAAAGGAGAAAATGAAAGAGCCGCTATATGATACAGCAATATAAGCCCAACGGGAAATAATCCG 8619
Falco_peregrinus : GGAATGAGAGAAAGCAACCTTTAAAGGCAAAATGAAATGAAAGGAGAAAATGAAAGAGCCGCTATATGATACAGCAATATAAGCCCAACGGGAAATAATCCG 8619
Dromaius_novaeollandiae : GGAATGAGAGAAAGCAACCTTTAAAGGCAAAATGAAATGAAAGGAGAAAATGAAAGAGCCGCTATATGATACAGCAATATAAGCCCAACGGGAAATAATCCG 8619
Struthio_camelus : GGAATGAGAGAAAGCAACCTTTAAAGGCAAAATGAAATGAAAGGAGAAAATGAAAGAGCCGCTATATGATACAGCAATATAAGCCCAACGGGAAATAATCCG 8619
Apteryx_haastii : GGAATGAGAGAAAGCAACCTTTAAAGGCAAAATGAAATGAAAGGAGAAAATGAAAGAGCCGCTATATGATACAGCAATATAAGCCCAACGGGAAATAATCCG 8619
Rhea_americanana : GGAATGAGAGAAAGCAACCTTTAAAGGCAAAATGAAATGAAAGGAGAAAATGAAAGAGCCGCTATATGATACAGCAATATAAGCCCAACGGGAAATAATCCG 8619
Gallus_gallus  : GGAATGAGAGAAAGCAACCTTTAAAGGCAAAATGAAATGAAAGGAGAAAATGAAAGAGCCGCTATATGATACAGCAATATAAGCCCAACGGGAAATAATCCG 8619
Ciconia_ciconia : GGAATGAGAGAAAGCAACCTTTAAAGGCAAAATGAAATGAAAGGAGAAAATGAAAGAGCCGCTATATGATACAGCAATATAAGCCCAACGGGAAATAATCCG 8619
Ciconia_boyciana : GGAATGAGAGAAAGCAACCTTTAAAGGCAAAATGAAATGAAAGGAGAAAATGAAAGAGCCGCTATATGATACAGCAATATAAGCCCAACGGGAAATAATCCG 8619
Iguana_iguana  : GGAATGAGAGAAAGCAACCTTTAAAGGCAAAATGAAATGAAAGGAGAAAATGAAAGAGCCGCTATATGATACAGCAATATAAGCCCAACGGGAAATAATCCG 8619
Fumeces_egregius : GGAATGAGAGAAAGCAACCTTTAAAGGCAAAATGAAATGAAAGGAGAAAATGAAAGAGCCGCTATATGATACAGCAATATAAGCCCAACGGGAAATAATCCG 8619
Sphenodon_punctatus : GGAATGAGAGAAAGCAACCTTTAAAGGCAAAATGAAATGAAAGGAGAAAATGAAAGAGCCGCTATATGATACAGCAATATAAGCCCAACGGGAAATAATCCG 8619
Sceloporus_occidentalis : GGAATGAGAGAAAGCAACCTTTAAAGGCAAAATGAAATGAAAGGAGAAAATGAAAGAGCCGCTATATGATACAGCAATATAAGCCCAACGGGAAATAATCCG 8619
Abronia_graminea : GGAATGAGAGAAAGCAACCTTTAAAGGCAAAATGAAATGAAAGGAGAAAATGAAAGAGCCGCTATATGATACAGCAATATAAGCCCAACGGGAAATAATCCG 8619
Shinisaurus_crocodilurus : GGAATGAGAGAAAGCAACCTTTAAAGGCAAAATGAAATGAAAGGAGAAAATGAAAGAGCCGCTATATGATACAGCAATATAAGCCCAACGGGAAATAATCCG 8619
Varanus_komodoensis : GGAATGAGAGAAAGCAACCTTTAAAGGCAAAATGAAATGAAAGGAGAAAATGAAAGAGCCGCTATATGATACAGCAATATAAGCCCAACGGGAAATAATCCG 8619
Rhineura_floridana : GGAATGAGAGAAAGCAACCTTTAAAGGCAAAATGAAATGAAAGGAGAAAATGAAAGAGCCGCTATATGATACAGCAATATAAGCCCAACGGGAAATAATCCG 8619
Geocalamus_acutus : GGAATGAGAGAAAGCAACCTTTAAAGGCAAAATGAAATGAAAGGAGAAAATGAAAGAGCCGCTATATGATACAGCAATATAAGCCCAACGGGAAATAATCCG 8619
Diplometopon_zarudnyi : GGAATGAGAGAAAGCAACCTTTAAAGGCAAAATGAAATGAAAGGAGAAAATGAAAGAGCCGCTATATGATACAGCAATATAAGCCCAACGGGAAATAATCCG 8619
Amphisbaena_schmidti : GGAATGAGAGAAAGCAACCTTTAAAGGCAAAATGAAATGAAAGGAGAAAATGAAAGAGCCGCTATATGATACAGCAATATAAGCCCAACGGGAAATAATCCG 8619
Bipes_tridactylus : GGAATGAGAGAAAGCAACCTTTAAAGGCAAAATGAAATGAAAGGAGAAAATGAAAGAGCCGCTATATGATACAGCAATATAAGCCCAACGGGAAATAATCCG 8619
Bipes_banaliculatus : GGAATGAGAGAAAGCAACCTTTAAAGGCAAAATGAAATGAAAGGAGAAAATGAAAGAGCCGCTATATGATACAGCAATATAAGCCCAACGGGAAATAATCCG 8619
Bipes_biporus  : GGAATGAGAGAAAGCAACCTTTAAAGGCAAAATGAAATGAAAGGAGAAAATGAAAGAGCCGCTATATGATACAGCAATATAAGCCCAACGGGAAATAATCCG 8619
Anolis_carolinensis : GGAATGAGAGAAAGCAACCTTTAAAGGCAAAATGAAATGAAAGGAGAAAATGAAAGAGCCGCTATATGATACAGCAATATAAGCCCAACGGGAAATAATCCG 8619
Ophisaurus_atnuatus : GGAATGAGAGAAAGCAACCTTTAAAGGCAAAATGAAATGAAAGGAGAAAATGAAAGAGCCGCTATATGATACAGCAATATAAGCCCAACGGGAAATAATCCG 8619
Varanus_salvator : GGAATGAGAGAAAGCAACCTTTAAAGGCAAAATGAAATGAAAGGAGAAAATGAAAGAGCCGCTATATGATACAGCAATATAAGCCCAACGGGAAATAATCCG 8619
Mertensiella_luschani : GGAATGAGAGAAAGCAACCTTTAAAGGCAAAATGAAATGAAAGGAGAAAATGAAAGAGCCGCTATATGATACAGCAATATAAGCCCAACGGGAAATAATCCG 8619
Xenopus_laevis : GGAATGAGAGAAAGCAACCTTTAAAGGCAAAATGAAATGAAAGGAGAAAATGAAAGAGCCGCTATATGATACAGCAATATAAGCCCAACGGGAAATAATCCG 8619

```



|                            | 9320 | *     | 9340  | *     | 9360  | *     | 9380  | *     | 9400  | *     | 9420  | *     | 9440  |        |
|----------------------------|------|-------|-------|-------|-------|-------|-------|-------|-------|-------|-------|-------|-------|--------|
| Bos_taurus                 | :    | ----- | ----- | ----- | ----- | ----- | ----- | ----- | ----- | ----- | ----- | ----- | ----- | : 8831 |
| Hylobates_lar              | :    | ----- | ----- | ----- | ----- | ----- | ----- | ----- | ----- | ----- | ----- | ----- | ----- | : 8840 |
| Lemur_catta                | :    | ----- | ----- | ----- | ----- | ----- | ----- | ----- | ----- | ----- | ----- | ----- | ----- | : 8837 |
| Nycticebus_coucang         | :    | ----- | ----- | ----- | ----- | ----- | ----- | ----- | ----- | ----- | ----- | ----- | ----- | : 8840 |
| Tarsius_bancanus           | :    | ----- | ----- | ----- | ----- | ----- | ----- | ----- | ----- | ----- | ----- | ----- | ----- | : 8834 |
| Gorilla_gorilla            | :    | ----- | ----- | ----- | ----- | ----- | ----- | ----- | ----- | ----- | ----- | ----- | ----- | : 8840 |
| Homo_sapiens               | :    | ----- | ----- | ----- | ----- | ----- | ----- | ----- | ----- | ----- | ----- | ----- | ----- | : 8831 |
| Papio_hamadryas            | :    | ----- | ----- | ----- | ----- | ----- | ----- | ----- | ----- | ----- | ----- | ----- | ----- | : 8840 |
| Cebus_albifrons            | :    | ----- | ----- | ----- | ----- | ----- | ----- | ----- | ----- | ----- | ----- | ----- | ----- | : 8834 |
| Macaca_sylvanus            | :    | ----- | ----- | ----- | ----- | ----- | ----- | ----- | ----- | ----- | ----- | ----- | ----- | : 8837 |
| Pongo_pygmaeus             | :    | ----- | ----- | ----- | ----- | ----- | ----- | ----- | ----- | ----- | ----- | ----- | ----- | : 8840 |
| Pan_paniscus               | :    | ----- | ----- | ----- | ----- | ----- | ----- | ----- | ----- | ----- | ----- | ----- | ----- | : 8840 |
| Agkistrodon_piscivorus     | :    | ----- | ----- | ----- | ----- | ----- | ----- | ----- | ----- | ----- | ----- | ----- | ----- | : 8783 |
| Pantherophis_guttatus      | :    | ----- | ----- | ----- | ----- | ----- | ----- | ----- | ----- | ----- | ----- | ----- | ----- | : 8783 |
| Dinodon_semicarinatus      | :    | ----- | ----- | ----- | ----- | ----- | ----- | ----- | ----- | ----- | ----- | ----- | ----- | : 8783 |
| Boa_constrictor            | :    | ----- | ----- | ----- | ----- | ----- | ----- | ----- | ----- | ----- | ----- | ----- | ----- | : 8810 |
| Python_regius              | :    | ----- | ----- | ----- | ----- | ----- | ----- | ----- | ----- | ----- | ----- | ----- | ----- | : 8807 |
| Acrochordus_granulatus     | :    | ----- | ----- | ----- | ----- | ----- | ----- | ----- | ----- | ----- | ----- | ----- | ----- | : 8804 |
| Cylindrophis_ruffus        | :    | ----- | ----- | ----- | ----- | ----- | ----- | ----- | ----- | ----- | ----- | ----- | ----- | : 8774 |
| Ovophis_okinavensis        | :    | ----- | ----- | ----- | ----- | ----- | ----- | ----- | ----- | ----- | ----- | ----- | ----- | : 8783 |
| Xenopeltis_unicolor        | :    | ----- | ----- | ----- | ----- | ----- | ----- | ----- | ----- | ----- | ----- | ----- | ----- | : 8813 |
| Typhlops_reticulatus       | :    | ----- | ----- | ----- | ----- | ----- | ----- | ----- | ----- | ----- | ----- | ----- | ----- | : 8747 |
| Leptotyphlops_dulcis       | :    | ----- | ----- | ----- | ----- | ----- | ----- | ----- | ----- | ----- | ----- | ----- | ----- | : 8754 |
| Caiman_crocodilus          | :    | ----- | ----- | ----- | ----- | ----- | ----- | ----- | ----- | ----- | ----- | ----- | ----- | : 8870 |
| Alligator_sinensis         | :    | ----- | ----- | ----- | ----- | ----- | ----- | ----- | ----- | ----- | ----- | ----- | ----- | : 8903 |
| Alligator_mississippiensis | :    | ----- | ----- | ----- | ----- | ----- | ----- | ----- | ----- | ----- | ----- | ----- | ----- | : 8852 |
| Gavialis_gangeticus        | :    | ----- | ----- | ----- | ----- | ----- | ----- | ----- | ----- | ----- | ----- | ----- | ----- | : 8880 |
| Crocodylus_moreletii       | :    | ----- | ----- | ----- | ----- | ----- | ----- | ----- | ----- | ----- | ----- | ----- | ----- | : 8856 |
| Dogania_subplana           | :    | ----- | ----- | ----- | ----- | ----- | ----- | ----- | ----- | ----- | ----- | ----- | ----- | : 8804 |
| Pelomedusa_subrufa         | :    | ----- | ----- | ----- | ----- | ----- | ----- | ----- | ----- | ----- | ----- | ----- | ----- | : 8828 |
| Chrysemys_picta            | :    | ----- | ----- | ----- | ----- | ----- | ----- | ----- | ----- | ----- | ----- | ----- | ----- | : 8849 |
| Chelonia_mydas             | :    | ----- | ----- | ----- | ----- | ----- | ----- | ----- | ----- | ----- | ----- | ----- | ----- | : 8852 |
| Tinamus_major              | :    | ----- | ----- | ----- | ----- | ----- | ----- | ----- | ----- | ----- | ----- | ----- | ----- | : 8822 |
| Smithornis_sharpei         | :    | ----- | ----- | ----- | ----- | ----- | ----- | ----- | ----- | ----- | ----- | ----- | ----- | : 8834 |
| Corvus_frugilegus          | :    | ----- | ----- | ----- | ----- | ----- | ----- | ----- | ----- | ----- | ----- | ----- | ----- | : 8834 |
| Vidua_chalybeata           | :    | ----- | ----- | ----- | ----- | ----- | ----- | ----- | ----- | ----- | ----- | ----- | ----- | : 8834 |
| Buteo_buteo                | :    | ----- | ----- | ----- | ----- | ----- | ----- | ----- | ----- | ----- | ----- | ----- | ----- | : 8831 |
| Falco_peregrinus           | :    | ----- | ----- | ----- | ----- | ----- | ----- | ----- | ----- | ----- | ----- | ----- | ----- | : 8825 |
| Dromaius_novaeollandiae    | :    | ----- | ----- | ----- | ----- | ----- | ----- | ----- | ----- | ----- | ----- | ----- | ----- | : 8831 |
| Struthio_camelus           | :    | ----- | ----- | ----- | ----- | ----- | ----- | ----- | ----- | ----- | ----- | ----- | ----- | : 8819 |
| Apteryx_haastii            | :    | ----- | ----- | ----- | ----- | ----- | ----- | ----- | ----- | ----- | ----- | ----- | ----- | : 8831 |
| Rhea_americanana           | :    | ----- | ----- | ----- | ----- | ----- | ----- | ----- | ----- | ----- | ----- | ----- | ----- | : 8831 |
| Gallus_gallus              | :    | ----- | ----- | ----- | ----- | ----- | ----- | ----- | ----- | ----- | ----- | ----- | ----- | : 8831 |
| Ciconia_ciconia            | :    | ----- | ----- | ----- | ----- | ----- | ----- | ----- | ----- | ----- | ----- | ----- | ----- | : 8837 |
| Ciconia_boycciana          | :    | ----- | ----- | ----- | ----- | ----- | ----- | ----- | ----- | ----- | ----- | ----- | ----- | : 8834 |
| Iguana_iguana              | :    | ----- | ----- | ----- | ----- | ----- | ----- | ----- | ----- | ----- | ----- | ----- | ----- | : 8819 |
| Eumeces_egregius           | :    | ----- | ----- | ----- | ----- | ----- | ----- | ----- | ----- | ----- | ----- | ----- | ----- | : 8819 |
| Sphenodon_punctatus        | :    | ----- | ----- | ----- | ----- | ----- | ----- | ----- | ----- | ----- | ----- | ----- | ----- | : 8828 |
| Sceloporus_occidentalis    | :    | ----- | ----- | ----- | ----- | ----- | ----- | ----- | ----- | ----- | ----- | ----- | ----- | : 8819 |
| Cordylus_warreni           | :    | ----- | ----- | ----- | ----- | ----- | ----- | ----- | ----- | ----- | ----- | ----- | ----- | : 8813 |
| Abronia_graminea           | :    | ----- | ----- | ----- | ----- | ----- | ----- | ----- | ----- | ----- | ----- | ----- | ----- | : 8822 |
| Shinisaurus_crocodilurus   | :    | ----- | ----- | ----- | ----- | ----- | ----- | ----- | ----- | ----- | ----- | ----- | ----- | : 8798 |
| Varanus_komodoensis        | :    | ----- | ----- | ----- | ----- | ----- | ----- | ----- | ----- | ----- | ----- | ----- | ----- | : 8855 |
| Rhineura_floridana         | :    | ----- | ----- | ----- | ----- | ----- | ----- | ----- | ----- | ----- | ----- | ----- | ----- | : 8801 |
| Geocalamus_acutus          | :    | ----- | ----- | ----- | ----- | ----- | ----- | ----- | ----- | ----- | ----- | ----- | ----- | : 8780 |
| Diplometopon_zarudnyi      | :    | ----- | ----- | ----- | ----- | ----- | ----- | ----- | ----- | ----- | ----- | ----- | ----- | : 8795 |
| Amphisbaena_schmidti       | :    | ----- | ----- | ----- | ----- | ----- | ----- | ----- | ----- | ----- | ----- | ----- | ----- | : 8780 |
| Bipes_tridactylus          | :    | ----- | ----- | ----- | ----- | ----- | ----- | ----- | ----- | ----- | ----- | ----- | ----- | : 8786 |
| Bipes_canaliculatus        | :    | ----- | ----- | ----- | ----- | ----- | ----- | ----- | ----- | ----- | ----- | ----- | ----- | : 8798 |
| Bipes_biporus              | :    | ----- | ----- | ----- | ----- | ----- | ----- | ----- | ----- | ----- | ----- | ----- | ----- | : 8840 |
| Anolis_carolinensis        | :    | ----- | ----- | ----- | ----- | ----- | ----- | ----- | ----- | ----- | ----- | ----- | ----- | : 8461 |
| Ophisaurus_atnuatus        | :    | ----- | ----- | ----- | ----- | ----- | ----- | ----- | ----- | ----- | ----- | ----- | ----- | : 8443 |
| Varanus_salvator           | :    | ----- | ----- | ----- | ----- | ----- | ----- | ----- | ----- | ----- | ----- | ----- | ----- | : 8846 |
| Mertensiella_luschani      | :    | ----- | ----- | ----- | ----- | ----- | ----- | ----- | ----- | ----- | ----- | ----- | ----- | : 8837 |
| Xenopus_laevis             | :    | ----- | ----- | ----- | ----- | ----- | ----- | ----- | ----- | ----- | ----- | ----- | ----- | : 8828 |



|                            |                                                                     |   |      |   |      |   |      |   |                                                          |   |      |   |        |  |
|----------------------------|---------------------------------------------------------------------|---|------|---|------|---|------|---|----------------------------------------------------------|---|------|---|--------|--|
|                            | 9580                                                                | * | 9600 | * | 9620 | * | 9640 | * | 9660                                                     | * | 9680 | * | 9700   |  |
| Bos_taurus                 | : ATGTAAGTAAATCAAAATACATGGTCTGATATGTAATAAANAACAAACAAACCAATGC        |   |      |   |      |   |      |   | ATAAATGACCAATGACGACGAGCTAGCTTACGATACCAATCAACCAATCAAC     |   |      |   | : 9079 |  |
| Hylobates_lar              | : CTAGTCTCAATCTCAACACATAGGGCTAGACCCGATCCACACCAACCAACCAACTCCCAATGC   |   |      |   |      |   |      |   | ATAGATAAATGACCAATGACGACGAGCTAGCTTACGATACCAATCAACCAATCAAC |   |      |   | : 9088 |  |
| Lemur_catta                | : CTAGTAACTAAATCTCAACACATAGGGCTAGACCCGATCCACACCAACCAACCAACTCCCAATGC |   |      |   |      |   |      |   | ATAAATGACCAATGACGACGAGCTAGCTTACGATACCAATCAACCAATCAAC     |   |      |   | : 9085 |  |
| Nycticebus_coucang         | : CTAGTAACTAAATCTCAACACATAGGGCTAGACCCGATCCACACCAACCAACCAACTCCCAATGC |   |      |   |      |   |      |   | ATAAATGACCAATGACGACGAGCTAGCTTACGATACCAATCAACCAATCAAC     |   |      |   | : 9091 |  |
| Tarsius_bancanus           | : CTAGTAACTAAATCTCAACACATAGGGCTAGACCCGATCCACACCAACCAACCAACTCCCAATGC |   |      |   |      |   |      |   | ATAAATGACCAATGACGACGAGCTAGCTTACGATACCAATCAACCAATCAAC     |   |      |   | : 9082 |  |
| Gorilla_gorilla            | : CTAGTAACTAAATCTCAACACATAGGGCTAGACCCGATCCACACCAACCAACCAACTCCCAATGC |   |      |   |      |   |      |   | ATAAATGACCAATGACGACGAGCTAGCTTACGATACCAATCAACCAATCAAC     |   |      |   | : 9088 |  |
| Homo_sapiens               | : CTAGTAACTAAATCTCAACACATAGGGCTAGACCCGATCCACACCAACCAACCAACTCCCAATGC |   |      |   |      |   |      |   | ATAAATGACCAATGACGACGAGCTAGCTTACGATACCAATCAACCAATCAAC     |   |      |   | : 9079 |  |
| Papio_hamadryas            | : CTAGTAACTAAATCTCAACACATAGGGCTAGACCCGATCCACACCAACCAACCAACTCCCAATGC |   |      |   |      |   |      |   | ATAAATGACCAATGACGACGAGCTAGCTTACGATACCAATCAACCAATCAAC     |   |      |   | : 9088 |  |
| Cebus_albifrons            | : CTAGTAACTAAATCTCAACACATAGGGCTAGACCCGATCCACACCAACCAACCAACTCCCAATGC |   |      |   |      |   |      |   | ATAAATGACCAATGACGACGAGCTAGCTTACGATACCAATCAACCAATCAAC     |   |      |   | : 9076 |  |
| Macaca_sylvanus            | : CTAGTAACTAAATCTCAACACATAGGGCTAGACCCGATCCACACCAACCAACCAACTCCCAATGC |   |      |   |      |   |      |   | ATAAATGACCAATGACGACGAGCTAGCTTACGATACCAATCAACCAATCAAC     |   |      |   | : 9085 |  |
| Pongo_pygmaeus             | : CTAGTAACTAAATCTCAACACATAGGGCTAGACCCGATCCACACCAACCAACCAACTCCCAATGC |   |      |   |      |   |      |   | ATAAATGACCAATGACGACGAGCTAGCTTACGATACCAATCAACCAATCAAC     |   |      |   | : 9088 |  |
| Pan_paniscus               | : CTAGTAACTAAATCTCAACACATAGGGCTAGACCCGATCCACACCAACCAACCAACTCCCAATGC |   |      |   |      |   |      |   | ATAAATGACCAATGACGACGAGCTAGCTTACGATACCAATCAACCAATCAAC     |   |      |   | : 9088 |  |
| Agkistrodon_piscivorus     | : GTTGTTCGAATCTCCGAAACCCCGGAAAGGACTTCTTAAAAAACTTAAATCCCTA           |   |      |   |      |   |      |   | ATGGGCTTAAACACCAACATATCTTCCGACAGCTTCTCTTCTAAACCGCTT      |   |      |   | : 9028 |  |
| Pantherophis_guttatus      | : GTTGTTCGAATCTCCGAAACCCCGGAAAGGACTTCTTAAAAAACTTAAATCCCTA           |   |      |   |      |   |      |   | ATGGGCTTAAACACCAACATATCTTCCGACAGCTTCTCTTCTAAACCGCTT      |   |      |   | : 9028 |  |
| Dinodon_semicarinatus      | : GTTGTTCGAATCTCCGAAACCCCGGAAAGGACTTCTTAAAAAACTTAAATCCCTA           |   |      |   |      |   |      |   | ATGGGCTTAAACACCAACATATCTTCCGACAGCTTCTCTTCTAAACCGCTT      |   |      |   | : 9028 |  |
| Boa_constrictor            | : GTTGTTCGAATCTCCGAAACCCCGGAAAGGACTTCTTAAAAAACTTAAATCCCTA           |   |      |   |      |   |      |   | ATGGGCTTAAACACCAACATATCTTCCGACAGCTTCTCTTCTAAACCGCTT      |   |      |   | : 9055 |  |
| Python_regius              | : GTTGTTCGAATCTCCGAAACCCCGGAAAGGACTTCTTAAAAAACTTAAATCCCTA           |   |      |   |      |   |      |   | ATGGGCTTAAACACCAACATATCTTCCGACAGCTTCTCTTCTAAACCGCTT      |   |      |   | : 9052 |  |
| Acrochordus_granulatus     | : GTTGTTCGAATCTCCGAAACCCCGGAAAGGACTTCTTAAAAAACTTAAATCCCTA           |   |      |   |      |   |      |   | ATGGGCTTAAACACCAACATATCTTCCGACAGCTTCTCTTCTAAACCGCTT      |   |      |   | : 9049 |  |
| Cylindrophis_ruffus        | : GTTGTTCGAATCTCCGAAACCCCGGAAAGGACTTCTTAAAAAACTTAAATCCCTA           |   |      |   |      |   |      |   | ATGGGCTTAAACACCAACATATCTTCCGACAGCTTCTCTTCTAAACCGCTT      |   |      |   | : 9019 |  |
| Ovophis_okinavensis        | : GTTGTTCGAATCTCCGAAACCCCGGAAAGGACTTCTTAAAAAACTTAAATCCCTA           |   |      |   |      |   |      |   | ATGGGCTTAAACACCAACATATCTTCCGACAGCTTCTCTTCTAAACCGCTT      |   |      |   | : 9028 |  |
| Xenopeltis_unicolor        | : GTTGTTCGAATCTCCGAAACCCCGGAAAGGACTTCTTAAAAAACTTAAATCCCTA           |   |      |   |      |   |      |   | ATGGGCTTAAACACCAACATATCTTCCGACAGCTTCTCTTCTAAACCGCTT      |   |      |   | : 9058 |  |
| Thelphops_reticulatus      | : CTAAATGCAACCTCCGAAACCCCGGAAAGGACTTCTTAAAAAACTTAAATCCCTA           |   |      |   |      |   |      |   | ATGGGCTTAAACACCAACATATCTTCCGACAGCTTCTCTTCTAAACCGCTT      |   |      |   | : 8992 |  |
| Leptotyphlops_dulcis       | : CTAAATGCAACCTCCGAAACCCCGGAAAGGACTTCTTAAAAAACTTAAATCCCTA           |   |      |   |      |   |      |   | ATGGGCTTAAACACCAACATATCTTCCGACAGCTTCTCTTCTAAACCGCTT      |   |      |   | : 9008 |  |
| Caiman_crocodilus          | : CTAAATGCAACCTCCGAAACCCCGGAAAGGACTTCTTAAAAAACTTAAATCCCTA           |   |      |   |      |   |      |   | ATGGGCTTAAACACCAACATATCTTCCGACAGCTTCTCTTCTAAACCGCTT      |   |      |   | : 9123 |  |
| Alligator_sinensis         | : CTAAATGCAACCTCCGAAACCCCGGAAAGGACTTCTTAAAAAACTTAAATCCCTA           |   |      |   |      |   |      |   | ATGGGCTTAAACACCAACATATCTTCCGACAGCTTCTCTTCTAAACCGCTT      |   |      |   | : 9160 |  |
| Alligator_mississippiensis | : CTAAATGCAACCTCCGAAACCCCGGAAAGGACTTCTTAAAAAACTTAAATCCCTA           |   |      |   |      |   |      |   | ATGGGCTTAAACACCAACATATCTTCCGACAGCTTCTCTTCTAAACCGCTT      |   |      |   | : 9108 |  |
| Gavialis_gangeticus        | : CTAAATGCAACCTCCGAAACCCCGGAAAGGACTTCTTAAAAAACTTAAATCCCTA           |   |      |   |      |   |      |   | ATGGGCTTAAACACCAACATATCTTCCGACAGCTTCTCTTCTAAACCGCTT      |   |      |   | : 9136 |  |
| Crocodylus_moreletii       | : CTAAATGCAACCTCCGAAACCCCGGAAAGGACTTCTTAAAAAACTTAAATCCCTA           |   |      |   |      |   |      |   | ATGGGCTTAAACACCAACATATCTTCCGACAGCTTCTCTTCTAAACCGCTT      |   |      |   | : 9112 |  |
| Dogania_subplana           | : CTAAATGCAACCTCCGAAACCCCGGAAAGGACTTCTTAAAAAACTTAAATCCCTA           |   |      |   |      |   |      |   | ATGGGCTTAAACACCAACATATCTTCCGACAGCTTCTCTTCTAAACCGCTT      |   |      |   | : 9052 |  |
| Pelomedusa_subrufa         | : CTAAATGCAACCTCCGAAACCCCGGAAAGGACTTCTTAAAAAACTTAAATCCCTA           |   |      |   |      |   |      |   | ATGGGCTTAAACACCAACATATCTTCCGACAGCTTCTCTTCTAAACCGCTT      |   |      |   | : 9088 |  |
| Chrysemys_picta            | : CTAAATGCAACCTCCGAAACCCCGGAAAGGACTTCTTAAAAAACTTAAATCCCTA           |   |      |   |      |   |      |   | ATGGGCTTAAACACCAACATATCTTCCGACAGCTTCTCTTCTAAACCGCTT      |   |      |   | : 9097 |  |
| Chelonia_mydas             | : CTAAATGCAACCTCCGAAACCCCGGAAAGGACTTCTTAAAAAACTTAAATCCCTA           |   |      |   |      |   |      |   | ATGGGCTTAAACACCAACATATCTTCCGACAGCTTCTCTTCTAAACCGCTT      |   |      |   | : 9103 |  |
| Tinanus_major              | : CTAAATGCAACCTCCGAAACCCCGGAAAGGACTTCTTAAAAAACTTAAATCCCTA           |   |      |   |      |   |      |   | ATGGGCTTAAACACCAACATATCTTCCGACAGCTTCTCTTCTAAACCGCTT      |   |      |   | : 9079 |  |
| Smithornis_sharpei         | : CTAAATGCAACCTCCGAAACCCCGGAAAGGACTTCTTAAAAAACTTAAATCCCTA           |   |      |   |      |   |      |   | ATGGGCTTAAACACCAACATATCTTCCGACAGCTTCTCTTCTAAACCGCTT      |   |      |   | : 9091 |  |
| Corvus_frugilegus          | : CTAAATGCAACCTCCGAAACCCCGGAAAGGACTTCTTAAAAAACTTAAATCCCTA           |   |      |   |      |   |      |   | ATGGGCTTAAACACCAACATATCTTCCGACAGCTTCTCTTCTAAACCGCTT      |   |      |   | : 9091 |  |
| Vidua_chalybeata           | : CTAAATGCAACCTCCGAAACCCCGGAAAGGACTTCTTAAAAAACTTAAATCCCTA           |   |      |   |      |   |      |   | ATGGGCTTAAACACCAACATATCTTCCGACAGCTTCTCTTCTAAACCGCTT      |   |      |   | : 9091 |  |
| Buteo_buteo                | : CTAAATGCAACCTCCGAAACCCCGGAAAGGACTTCTTAAAAAACTTAAATCCCTA           |   |      |   |      |   |      |   | ATGGGCTTAAACACCAACATATCTTCCGACAGCTTCTCTTCTAAACCGCTT      |   |      |   | : 9088 |  |
| Falco_peregrinus           | : CTAAATGCAACCTCCGAAACCCCGGAAAGGACTTCTTAAAAAACTTAAATCCCTA           |   |      |   |      |   |      |   | ATGGGCTTAAACACCAACATATCTTCCGACAGCTTCTCTTCTAAACCGCTT      |   |      |   | : 9082 |  |
| Dromaius_novaeollandiae    | : CTAAATGCAACCTCCGAAACCCCGGAAAGGACTTCTTAAAAAACTTAAATCCCTA           |   |      |   |      |   |      |   | ATGGGCTTAAACACCAACATATCTTCCGACAGCTTCTCTTCTAAACCGCTT      |   |      |   | : 9088 |  |
| Struthio_camelus           | : CTAAATGCAACCTCCGAAACCCCGGAAAGGACTTCTTAAAAAACTTAAATCCCTA           |   |      |   |      |   |      |   | ATGGGCTTAAACACCAACATATCTTCCGACAGCTTCTCTTCTAAACCGCTT      |   |      |   | : 9076 |  |
| Apteryx_haastii            | : CTAAATGCAACCTCCGAAACCCCGGAAAGGACTTCTTAAAAAACTTAAATCCCTA           |   |      |   |      |   |      |   | ATGGGCTTAAACACCAACATATCTTCCGACAGCTTCTCTTCTAAACCGCTT      |   |      |   | : 9088 |  |
| Rhea_american              | : CTAAATGCAACCTCCGAAACCCCGGAAAGGACTTCTTAAAAAACTTAAATCCCTA           |   |      |   |      |   |      |   | ATGGGCTTAAACACCAACATATCTTCCGACAGCTTCTCTTCTAAACCGCTT      |   |      |   | : 9088 |  |
| Gallus_gallus              | : CTAAATGCAACCTCCGAAACCCCGGAAAGGACTTCTTAAAAAACTTAAATCCCTA           |   |      |   |      |   |      |   | ATGGGCTTAAACACCAACATATCTTCCGACAGCTTCTCTTCTAAACCGCTT      |   |      |   | : 9088 |  |
| Ciconia_ciconia            | : CTAAATGCAACCTCCGAAACCCCGGAAAGGACTTCTTAAAAAACTTAAATCCCTA           |   |      |   |      |   |      |   | ATGGGCTTAAACACCAACATATCTTCCGACAGCTTCTCTTCTAAACCGCTT      |   |      |   | : 9094 |  |
| Ciconia_boyciana           | : CTAAATGCAACCTCCGAAACCCCGGAAAGGACTTCTTAAAAAACTTAAATCCCTA           |   |      |   |      |   |      |   | ATGGGCTTAAACACCAACATATCTTCCGACAGCTTCTCTTCTAAACCGCTT      |   |      |   | : 9091 |  |
| Iguana_iguana              | : CTAAATGCAACCTCCGAAACCCCGGAAAGGACTTCTTAAAAAACTTAAATCCCTA           |   |      |   |      |   |      |   | ATGGGCTTAAACACCAACATATCTTCCGACAGCTTCTCTTCTAAACCGCTT      |   |      |   | : 9070 |  |
| Eumeces_egregius           | : CTAAATGCAACCTCCGAAACCCCGGAAAGGACTTCTTAAAAAACTTAAATCCCTA           |   |      |   |      |   |      |   | ATGGGCTTAAACACCAACATATCTTCCGACAGCTTCTCTTCTAAACCGCTT      |   |      |   | : 9070 |  |
| Sphenodon_punctatus        | : CTAAATGCAACCTCCGAAACCCCGGAAAGGACTTCTTAAAAAACTTAAATCCCTA           |   |      |   |      |   |      |   | ATGGGCTTAAACACCAACATATCTTCCGACAGCTTCTCTTCTAAACCGCTT      |   |      |   | : 9024 |  |
| Sceloporus_occidentalis    | : CTAAATGCAACCTCCGAAACCCCGGAAAGGACTTCTTAAAAAACTTAAATCCCTA           |   |      |   |      |   |      |   | ATGGGCTTAAACACCAACATATCTTCCGACAGCTTCTCTTCTAAACCGCTT      |   |      |   | : 9073 |  |
| Cordylus_warreni           | : CTAAATGCAACCTCCGAAACCCCGGAAAGGACTTCTTAAAAAACTTAAATCCCTA           |   |      |   |      |   |      |   | ATGGGCTTAAACACCAACATATCTTCCGACAGCTTCTCTTCTAAACCGCTT      |   |      |   | : 9067 |  |
| Abronia_graminea           | : CTAAATGCAACCTCCGAAACCCCGGAAAGGACTTCTTAAAAAACTTAAATCCCTA           |   |      |   |      |   |      |   | ATGGGCTTAAACACCAACATATCTTCCGACAGCTTCTCTTCTAAACCGCTT      |   |      |   | : 9076 |  |
| Shinisaurus_crocodilurus   | : CTAAATGCAACCTCCGAAACCCCGGAAAGGACTTCTTAAAAAACTTAAATCCCTA           |   |      |   |      |   |      |   | ATGGGCTTAAACACCAACATATCTTCCGACAGCTTCTCTTCTAAACCGCTT      |   |      |   | : 9052 |  |
| Varanus_komodoensis        | : CTAAATGCAACCTCCGAAACCCCGGAAAGGACTTCTTAAAAAACTTAAATCCCTA           |   |      |   |      |   |      |   | ATGGGCTTAAACACCAACATATCTTCCGACAGCTTCTCTTCTAAACCGCTT      |   |      |   | : 9109 |  |
| Rhineura_floridana         | : CTAAATGCAACCTCCGAAACCCCGGAAAGGACTTCTTAAAAAACTTAAATCCCTA           |   |      |   |      |   |      |   | ATGGGCTTAAACACCAACATATCTTCCGACAGCTTCTCTTCTAAACCGCTT      |   |      |   | : 9052 |  |
| Geocalamus_acutus          | : CTAAATGCAACCTCCGAAACCCCGGAAAGGACTTCTTAAAAAACTTAAATCCCTA           |   |      |   |      |   |      |   | ATGGGCTTAAACACCAACATATCTTCCGACAGCTTCTCTTCTAAACCGCTT      |   |      |   | : 9034 |  |
| Diplometopon_zarudnyi      | : CTAAATGCAACCTCCGAAACCCCGGAAAGGACTTCTTAAAAAACTTAAATCCCTA           |   |      |   |      |   |      |   | ATGGGCTTAAACACCAACATATCTTCCGACAGCTTCTCTTCTAAACCGCTT      |   |      |   | : 9049 |  |
| Amphisbaena_schmidti       | : CTAAATGCAACCTCCGAAACCCCGGAAAGGACTTCTTAAAAAACTTAAATCCCTA           |   |      |   |      |   |      |   | ATGGGCTTAAACACCAACATATCTTCCGACAGCTTCTCTTCTAAACCGCTT      |   |      |   | : 9034 |  |
| Bipes_tridactylus          | : CTAAATGCAACCTCCGAAACCCCGGAAAGGACTTCTTAAAAAACTTAAATCCCTA           |   |      |   |      |   |      |   | ATGGGCTTAAACACCAACATATCTTCCGACAGCTTCTCTTCTAAACCGCTT      |   |      |   | : 9040 |  |
| Bipes_canaliculatus        | : CTAAATGCAACCTCCGAAACCCCGGAAAGGACTTCTTAAAAAACTTAAATCCCTA           |   |      |   |      |   |      |   | ATGGGCTTAAACACCAACATATCTTCCGACAGCTTCTCTTCTAAACCGCTT      |   |      |   | : 9052 |  |
| Bipes_biporus              | : CTAAATGCAACCTCCGAAACCCCGGAAAGGACTTCTTAAAAAACTTAAATCCCTA           |   |      |   |      |   |      |   | ATGGGCTTAAACACCAACATATCTTCCGACAGCTTCTCTTCTAAACCGCTT      |   |      |   | : 9094 |  |
| Anolis_carolinensis        | : CTAAATGCAACCTCCGAAACCCCGGAAAGGACTTCTTAAAAAACTTAAATCCCTA           |   |      |   |      |   |      |   | ATGGGCTTAAACACCAACATATCTTCCGACAGCTTCTCTTCTAAACCGCTT      |   |      |   | : 8715 |  |
| Ophisaurus_atnuatus        | : CTAAATGCAACCTCCGAAACCCCGGAAAGGACTTCTTAAAAAACTTAAATCCCTA           |   |      |   |      |   |      |   | ATGGGCTTAAACACCAACATATCTTCCGACAGCTTCTCTTCTAAACCGCTT      |   |      |   | : 8697 |  |
| Varanus_salvator           | : CTAAATGCAACCTCCGAAACCCCGGAAAGGACTTCTTAAAAAACTTAAATCCCTA           |   |      |   |      |   |      |   | ATGGGCTTAAACACCAACATATCTTCCGACAGCTTCTCTTCTAAACCGCTT      |   |      |   | : 9100 |  |
| Mertensiella_luschani      | : CTAAATGCAACCTCCGAAACCCCGGAAAGGACTTCTTAAAAAACTTAAATCCCTA           |   |      |   |      |   |      |   | ATGGGCTTAAACACCAACATATCTTCCGACAGCTTCTCTTCTAAACCGCTT      |   |      |   | : 9094 |  |
| Xenopus_laevis             | : CTAAATGCAACCTCCGAAACCCCGGAAAGGACTTCTTAAAAAACTTAAATCCCTA           |   |      |   |      |   |      |   | ATGGGCTTAAACACCAACATATCTTCCGACAGCTTCTCTTCTAAACCGCTT      |   |      |   | : 9085 |  |





|                            | * | 9860                                                                                                                      | * | 9880 | * | 9900 | * | 9920 | * | 9940 | * | 9960 | * |  |
|----------------------------|---|---------------------------------------------------------------------------------------------------------------------------|---|------|---|------|---|------|---|------|---|------|---|--|
| Bos_taurus                 | : | CCCCAATAAATATTAACACACGGCCAGGAAATAATATTAATAAAGACATGCAAGCAATCCAAAATCTAAATATACCCAGCTTAAATAGACATTTCCCAATAAATATTAACCCGGTAGCC   | : | 9306 |   |      |   |      |   |      |   |      |   |  |
| Hylobates_lar              | : | TCCCCAATAAATATTAACACGGCCAGGAAACATATATTTAAAGACATGCAAGCAATCCAAAATCTAAATATACCCAGCTTAAATAGACATTTCCCAATAAATATTAACCCGGTAGCC     | : | 9315 |   |      |   |      |   |      |   |      |   |  |
| Lemur_catta                | : | CCCCAATAAATATTAACACGGCCAGGAAACATATATTTAAAGACATGCAAGCAATCCAAAATCTAAATATACCCAGCTTAAATAGACATTTCCCAATAAATATTAACCCGGTAGCC      | : | 9312 |   |      |   |      |   |      |   |      |   |  |
| Nycticebus_coucang         | : | TCCAGCTTCTCTTTGTTTCCGGCCAGGAAACATATATTTAAAGACATGCAAGCAATCCAAAATCTAAATATACCCAGCTTAAATAGACATTTCCCAATAAATATTAACCCGGTAGCC     | : | 9315 |   |      |   |      |   |      |   |      |   |  |
| Tarsius_bancanus           | : | TCCAAATACATATTAATTTCTCCAGCCAGGAAACATATATTTAAAGACATGCAAGCAATCCAAAATCTAAATATACCCAGCTTAAATAGACATTTCCCAATAAATATTAACCCGGTAGCC  | : | 9309 |   |      |   |      |   |      |   |      |   |  |
| Gorilla_gorilla            | : | CCCCAATAAATATTAACACGGCCAGGAAACATATATTTAAAGACATGCAAGCAATCCAAAATCTAAATATACCCAGCTTAAATAGACATTTCCCAATAAATATTAACCCGGTAGCC      | : | 9315 |   |      |   |      |   |      |   |      |   |  |
| Homo_sapiens               | : | CCCCAATAAATATTAACACGGCCAGGAAACATATATTTAAAGACATGCAAGCAATCCAAAATCTAAATATACCCAGCTTAAATAGACATTTCCCAATAAATATTAACCCGGTAGCC      | : | 9306 |   |      |   |      |   |      |   |      |   |  |
| Papio_hamadryas            | : | TCCAAATACATATTAATTTCTCCAGCCAGGAAACATATATTTAAAGACATGCAAGCAATCCAAAATCTAAATATACCCAGCTTAAATAGACATTTCCCAATAAATATTAACCCGGTAGCC  | : | 9315 |   |      |   |      |   |      |   |      |   |  |
| Cebus_albifrons            | : | GTCTATACAAATATTTATTTCTCCAGCCAGGAAACATATATTTAAAGACATGCAAGCAATCCAAAATCTAAATATACCCAGCTTAAATAGACATTTCCCAATAAATATTAACCCGGTAGCC | : | 9303 |   |      |   |      |   |      |   |      |   |  |
| Macaca_sylvanus            | : | TCCAAATACATATTAATTTCTCCAGCCAGGAAACATATATTTAAAGACATGCAAGCAATCCAAAATCTAAATATACCCAGCTTAAATAGACATTTCCCAATAAATATTAACCCGGTAGCC  | : | 9312 |   |      |   |      |   |      |   |      |   |  |
| Pongo_pygmaeus             | : | CCCCAATAAATATTAACACGGCCAGGAAACATATATTTAAAGACATGCAAGCAATCCAAAATCTAAATATACCCAGCTTAAATAGACATTTCCCAATAAATATTAACCCGGTAGCC      | : | 9315 |   |      |   |      |   |      |   |      |   |  |
| Pan_paniscus               | : | CCCCAATAAATATTAACACGGCCAGGAAACATATATTTAAAGACATGCAAGCAATCCAAAATCTAAATATACCCAGCTTAAATAGACATTTCCCAATAAATATTAACCCGGTAGCC      | : | 9315 |   |      |   |      |   |      |   |      |   |  |
| Agkistrodon_piscivorus     | : | CCCCAATAAATATTAACACGGCCAGGAAACATATATTTAAAGACATGCAAGCAATCCAAAATCTAAATATACCCAGCTTAAATAGACATTTCCCAATAAATATTAACCCGGTAGCC      | : | 9240 |   |      |   |      |   |      |   |      |   |  |
| Pantherophis_guttatus      | : | CCCCAATAAATATTAACACGGCCAGGAAACATATATTTAAAGACATGCAAGCAATCCAAAATCTAAATATACCCAGCTTAAATAGACATTTCCCAATAAATATTAACCCGGTAGCC      | : | 9219 |   |      |   |      |   |      |   |      |   |  |
| Dinodon_semicarinatus      | : | TCCAAATACATATTAATTTCTCCAGCCAGGAAACATATATTTAAAGACATGCAAGCAATCCAAAATCTAAATATACCCAGCTTAAATAGACATTTCCCAATAAATATTAACCCGGTAGCC  | : | 9222 |   |      |   |      |   |      |   |      |   |  |
| Boa_constrictor            | : | CCCCAATAAATATTAACACGGCCAGGAAACATATATTTAAAGACATGCAAGCAATCCAAAATCTAAATATACCCAGCTTAAATAGACATTTCCCAATAAATATTAACCCGGTAGCC      | : | 9270 |   |      |   |      |   |      |   |      |   |  |
| Python_regius              | : | TCCAAATACATATTAATTTCTCCAGCCAGGAAACATATATTTAAAGACATGCAAGCAATCCAAAATCTAAATATACCCAGCTTAAATAGACATTTCCCAATAAATATTAACCCGGTAGCC  | : | 9270 |   |      |   |      |   |      |   |      |   |  |
| Acrochordus_granulatus     | : | CCCCAATAAATATTAACACGGCCAGGAAACATATATTTAAAGACATGCAAGCAATCCAAAATCTAAATATACCCAGCTTAAATAGACATTTCCCAATAAATATTAACCCGGTAGCC      | : | 9252 |   |      |   |      |   |      |   |      |   |  |
| Cyclodorus_ruffus          | : | TCCAAATACATATTAATTTCTCCAGCCAGGAAACATATATTTAAAGACATGCAAGCAATCCAAAATCTAAATATACCCAGCTTAAATAGACATTTCCCAATAAATATTAACCCGGTAGCC  | : | 9237 |   |      |   |      |   |      |   |      |   |  |
| Ovophis_okinavensis        | : | CCCCAATAAATATTAACACGGCCAGGAAACATATATTTAAAGACATGCAAGCAATCCAAAATCTAAATATACCCAGCTTAAATAGACATTTCCCAATAAATATTAACCCGGTAGCC      | : | 9240 |   |      |   |      |   |      |   |      |   |  |
| Xenopeltis_unicolor        | : | CCCCAATAAATATTAACACGGCCAGGAAACATATATTTAAAGACATGCAAGCAATCCAAAATCTAAATATACCCAGCTTAAATAGACATTTCCCAATAAATATTAACCCGGTAGCC      | : | 9276 |   |      |   |      |   |      |   |      |   |  |
| Typhlops_reticulatus       | : | CCCCAATAAATATTAACACGGCCAGGAAACATATATTTAAAGACATGCAAGCAATCCAAAATCTAAATATACCCAGCTTAAATAGACATTTCCCAATAAATATTAACCCGGTAGCC      | : | 9216 |   |      |   |      |   |      |   |      |   |  |
| Leptotyphlops_dulcis       | : | CCCCAATAAATATTAACACGGCCAGGAAACATATATTTAAAGACATGCAAGCAATCCAAAATCTAAATATACCCAGCTTAAATAGACATTTCCCAATAAATATTAACCCGGTAGCC      | : | 9226 |   |      |   |      |   |      |   |      |   |  |
| Caiman_crocodylus          | : | CCCCAATAAATATTAACACGGCCAGGAAACATATATTTAAAGACATGCAAGCAATCCAAAATCTAAATATACCCAGCTTAAATAGACATTTCCCAATAAATATTAACCCGGTAGCC      | : | 9333 |   |      |   |      |   |      |   |      |   |  |
| Alligator_sinensis         | : | CCCCAATAAATATTAACACGGCCAGGAAACATATATTTAAAGACATGCAAGCAATCCAAAATCTAAATATACCCAGCTTAAATAGACATTTCCCAATAAATATTAACCCGGTAGCC      | : | 9375 |   |      |   |      |   |      |   |      |   |  |
| Alligator_mississippiensis | : | CCCCAATAAATATTAACACGGCCAGGAAACATATATTTAAAGACATGCAAGCAATCCAAAATCTAAATATACCCAGCTTAAATAGACATTTCCCAATAAATATTAACCCGGTAGCC      | : | 9315 |   |      |   |      |   |      |   |      |   |  |
| Gavialis_gangeticus        | : | CCCCAATAAATATTAACACGGCCAGGAAACATATATTTAAAGACATGCAAGCAATCCAAAATCTAAATATACCCAGCTTAAATAGACATTTCCCAATAAATATTAACCCGGTAGCC      | : | 9343 |   |      |   |      |   |      |   |      |   |  |
| Crocodylus_moreletii       | : | CCCCAATAAATATTAACACGGCCAGGAAACATATATTTAAAGACATGCAAGCAATCCAAAATCTAAATATACCCAGCTTAAATAGACATTTCCCAATAAATATTAACCCGGTAGCC      | : | 9319 |   |      |   |      |   |      |   |      |   |  |
| Dogania_subplana           | : | CCCCAATAAATATTAACACGGCCAGGAAACATATATTTAAAGACATGCAAGCAATCCAAAATCTAAATATACCCAGCTTAAATAGACATTTCCCAATAAATATTAACCCGGTAGCC      | : | 9255 |   |      |   |      |   |      |   |      |   |  |
| Pelomedusa_subrufa         | : | CCCCAATAAATATTAACACGGCCAGGAAACATATATTTAAAGACATGCAAGCAATCCAAAATCTAAATATACCCAGCTTAAATAGACATTTCCCAATAAATATTAACCCGGTAGCC      | : | 9306 |   |      |   |      |   |      |   |      |   |  |
| Chrysemys_picta            | : | CCCCAATAAATATTAACACGGCCAGGAAACATATATTTAAAGACATGCAAGCAATCCAAAATCTAAATATACCCAGCTTAAATAGACATTTCCCAATAAATATTAACCCGGTAGCC      | : | 9315 |   |      |   |      |   |      |   |      |   |  |
| Helonia_mydas              | : | CCCCAATAAATATTAACACGGCCAGGAAACATATATTTAAAGACATGCAAGCAATCCAAAATCTAAATATACCCAGCTTAAATAGACATTTCCCAATAAATATTAACCCGGTAGCC      | : | 9324 |   |      |   |      |   |      |   |      |   |  |
| Tinanus_major              | : | CCCCAATAAATATTAACACGGCCAGGAAACATATATTTAAAGACATGCAAGCAATCCAAAATCTAAATATACCCAGCTTAAATAGACATTTCCCAATAAATATTAACCCGGTAGCC      | : | 9303 |   |      |   |      |   |      |   |      |   |  |
| Smithornis_sharpei         | : | CCCCAATAAATATTAACACGGCCAGGAAACATATATTTAAAGACATGCAAGCAATCCAAAATCTAAATATACCCAGCTTAAATAGACATTTCCCAATAAATATTAACCCGGTAGCC      | : | 9309 |   |      |   |      |   |      |   |      |   |  |
| Corvus_frugilegus          | : | CCCCAATAAATATTAACACGGCCAGGAAACATATATTTAAAGACATGCAAGCAATCCAAAATCTAAATATACCCAGCTTAAATAGACATTTCCCAATAAATATTAACCCGGTAGCC      | : | 9315 |   |      |   |      |   |      |   |      |   |  |
| Vidua_chalybeata           | : | CCCCAATAAATATTAACACGGCCAGGAAACATATATTTAAAGACATGCAAGCAATCCAAAATCTAAATATACCCAGCTTAAATAGACATTTCCCAATAAATATTAACCCGGTAGCC      | : | 9315 |   |      |   |      |   |      |   |      |   |  |
| Buteo_buteo                | : | CCCCAATAAATATTAACACGGCCAGGAAACATATATTTAAAGACATGCAAGCAATCCAAAATCTAAATATACCCAGCTTAAATAGACATTTCCCAATAAATATTAACCCGGTAGCC      | : | 9315 |   |      |   |      |   |      |   |      |   |  |
| Falco_peregrinus           | : | CCCCAATAAATATTAACACGGCCAGGAAACATATATTTAAAGACATGCAAGCAATCCAAAATCTAAATATACCCAGCTTAAATAGACATTTCCCAATAAATATTAACCCGGTAGCC      | : | 9312 |   |      |   |      |   |      |   |      |   |  |
| Dromaius_novaeollandiae    | : | CCCCAATAAATATTAACACGGCCAGGAAACATATATTTAAAGACATGCAAGCAATCCAAAATCTAAATATACCCAGCTTAAATAGACATTTCCCAATAAATATTAACCCGGTAGCC      | : | 9306 |   |      |   |      |   |      |   |      |   |  |
| Struthio_camelus           | : | CCCCAATAAATATTAACACGGCCAGGAAACATATATTTAAAGACATGCAAGCAATCCAAAATCTAAATATACCCAGCTTAAATAGACATTTCCCAATAAATATTAACCCGGTAGCC      | : | 9312 |   |      |   |      |   |      |   |      |   |  |
| Apteryx_haastii            | : | CCCCAATAAATATTAACACGGCCAGGAAACATATATTTAAAGACATGCAAGCAATCCAAAATCTAAATATACCCAGCTTAAATAGACATTTCCCAATAAATATTAACCCGGTAGCC      | : | 9300 |   |      |   |      |   |      |   |      |   |  |
| Rhea_american              | : | CCCCAATAAATATTAACACGGCCAGGAAACATATATTTAAAGACATGCAAGCAATCCAAAATCTAAATATACCCAGCTTAAATAGACATTTCCCAATAAATATTAACCCGGTAGCC      | : | 9312 |   |      |   |      |   |      |   |      |   |  |
| Gallus_gallus              | : | CCCCAATAAATATTAACACGGCCAGGAAACATATATTTAAAGACATGCAAGCAATCCAAAATCTAAATATACCCAGCTTAAATAGACATTTCCCAATAAATATTAACCCGGTAGCC      | : | 9309 |   |      |   |      |   |      |   |      |   |  |
| Ciconia_ciconia            | : | CCCCAATAAATATTAACACGGCCAGGAAACATATATTTAAAGACATGCAAGCAATCCAAAATCTAAATATACCCAGCTTAAATAGACATTTCCCAATAAATATTAACCCGGTAGCC      | : | 9318 |   |      |   |      |   |      |   |      |   |  |
| Ciconia_boydciana          | : | CCCCAATAAATATTAACACGGCCAGGAAACATATATTTAAAGACATGCAAGCAATCCAAAATCTAAATATACCCAGCTTAAATAGACATTTCCCAATAAATATTAACCCGGTAGCC      | : | 9315 |   |      |   |      |   |      |   |      |   |  |
| Iguana_iguana              | : | CCCCAATAAATATTAACACGGCCAGGAAACATATATTTAAAGACATGCAAGCAATCCAAAATCTAAATATACCCAGCTTAAATAGACATTTCCCAATAAATATTAACCCGGTAGCC      | : | 9297 |   |      |   |      |   |      |   |      |   |  |
| Eumeces_egregius           | : | CCCCAATAAATATTAACACGGCCAGGAAACATATATTTAAAGACATGCAAGCAATCCAAAATCTAAATATACCCAGCTTAAATAGACATTTCCCAATAAATATTAACCCGGTAGCC      | : | 9300 |   |      |   |      |   |      |   |      |   |  |
| Sphenodon_punctatus        | : | CCCCAATAAATATTAACACGGCCAGGAAACATATATTTAAAGACATGCAAGCAATCCAAAATCTAAATATACCCAGCTTAAATAGACATTTCCCAATAAATATTAACCCGGTAGCC      | : | -    |   |      |   |      |   |      |   |      |   |  |
| Sceloporus_occidentalis    | : | CCCCAATAAATATTAACACGGCCAGGAAACATATATTTAAAGACATGCAAGCAATCCAAAATCTAAATATACCCAGCTTAAATAGACATTTCCCAATAAATATTAACCCGGTAGCC      | : | 9291 |   |      |   |      |   |      |   |      |   |  |
| Cordylus_warreni           | : | CCCCAATAAATATTAACACGGCCAGGAAACATATATTTAAAGACATGCAAGCAATCCAAAATCTAAATATACCCAGCTTAAATAGACATTTCCCAATAAATATTAACCCGGTAGCC      | : | 9297 |   |      |   |      |   |      |   |      |   |  |
| Abronia_graminea           | : | CCCCAATAAATATTAACACGGCCAGGAAACATATATTTAAAGACATGCAAGCAATCCAAAATCTAAATATACCCAGCTTAAATAGACATTTCCCAATAAATATTAACCCGGTAGCC      | : | 9306 |   |      |   |      |   |      |   |      |   |  |
| Shinisaurus_crocodylurus   | : | CCCCAATAAATATTAACACGGCCAGGAAACATATATTTAAAGACATGCAAGCAATCCAAAATCTAAATATACCCAGCTTAAATAGACATTTCCCAATAAATATTAACCCGGTAGCC      | : | 9282 |   |      |   |      |   |      |   |      |   |  |
| Varanus_komodoensis        | : | CCCCAATAAATATTAACACGGCCAGGAAACATATATTTAAAGACATGCAAGCAATCCAAAATCTAAATATACCCAGCTTAAATAGACATTTCCCAATAAATATTAACCCGGTAGCC      | : | 9321 |   |      |   |      |   |      |   |      |   |  |
| Rhineura_floridana         | : | CCCCAATAAATATTAACACGGCCAGGAAACATATATTTAAAGACATGCAAGCAATCCAAAATCTAAATATACCCAGCTTAAATAGACATTTCCCAATAAATATTAACCCGGTAGCC      | : | 9279 |   |      |   |      |   |      |   |      |   |  |
| Geocalamus_acutus          | : | CCCCAATAAATATTAACACGGCCAGGAAACATATATTTAAAGACATGCAAGCAATCCAAAATCTAAATATACCCAGCTTAAATAGACATTTCCCAATAAATATTAACCCGGTAGCC      | : | 9249 |   |      |   |      |   |      |   |      |   |  |
| Diplometopon_zarudnyi      | : | CCCCAATAAATATTAACACGGCCAGGAAACATATATTTAAAGACATGCAAGCAATCCAAAATCTAAATATACCCAGCTTAAATAGACATTTCCCAATAAATATTAACCCGGTAGCC      | : | 9267 |   |      |   |      |   |      |   |      |   |  |
| Amphisbaena_schmidti       | : | CCCCAATAAATATTAACACGGCCAGGAAACATATATTTAAAGACATGCAAGCAATCCAAAATCTAAATATACCCAGCTTAAATAGACATTTCCCAATAAATATTAACCCGGTAGCC      | : | 9252 |   |      |   |      |   |      |   |      |   |  |
| Bipes_tridactylus          | : | CCCCAATAAATATTAACACGGCCAGGAAACATATATTTAAAGACATGCAAGCAATCCAAAATCTAAATATACCCAGCTTAAATAGACATTTCCCAATAAATATTAACCCGGTAGCC      | : | 9252 |   |      |   |      |   |      |   |      |   |  |
| Bipes_canaliculatus        | : | CCCCAATAAATATTAACACGGCCAGGAAACATATATTTAAAGACATGCAAGCAATCCAAAATCTAAATATACCCAGCTTAAATAGACATTTCCCAATAAATATTAACCCGGTAGCC      | : | 9264 |   |      |   |      |   |      |   |      |   |  |
| Bipes_biporus              | : | CCCCAATAAATATTAACACGGCCAGGAAACATATATTTAAAGACATGCAAGCAATCCAAAATCTAAATATACCCAGCTTAAATAGACATTTCCCAATAAATATTAACCCGGTAGCC      | : | 9306 |   |      |   |      |   |      |   |      |   |  |
| Anolis_carolinensis        | : | CCCCAATAAATATTAACACGGCCAGGAAACATATATTTAAAGACATGCAAGCAATCCAAAATCTAAATATACCCAGCTTAAATAGACATTTCCCAATAAATATTAACCCGGTAGCC      | : | 9344 |   |      |   |      |   |      |   |      |   |  |
| Ophisaurus_atnuatus        | : | CCCCAATAAATATTAACACGGCCAGGAAACATATATTTAAAGACATGCAAGCAATCCAAAATCTAAATATACCCAGCTTAAATAGACATTTCCCAATAAATATTAACCCGGTAGCC      | : | 9306 |   |      |   |      |   |      |   |      |   |  |
| Varanus_salvator           | : | CCCCAATAAATATTAACACGGCCAGGAAACATATATTTAAAGACATGCAAGCAATCCAAAATCTAAATATACCCAGCTTAAATAGACATTTCCCAATAAATATTAACCCGGTAGCC      | : | 9312 |   |      |   |      |   |      |   |      |   |  |
| Mertensiella_luschani      | : | CCCCAATAAATATTAACACGGCCAGGAAACATATATTTAAAGACATGCAAGCAATCCAAAATCTAAATATACCCAGCTTAAATAGACATTTCCCAATAAATATTAACCCGGTAGCC      | : | 9318 |   |      |   |      |   |      |   |      |   |  |
| Xenopus_laevis             | : | CCCCAATAAATATTAACACGGCCAGGAAACATATATTTAAAGACATGCAAGCAATCCAAAATCTAAATATACCCAGCTTAAATAGACATTTCCCAATAAATATTAACCCGGTAGCC      | : | 9309 |   |      |   |      |   |      |   |      |   |  |

|                            | 9980 | * | 10000 | * | 10020 | * | 10040 | * | 10060 | * | 10080 | * | 10100 |      |
|----------------------------|------|---|-------|---|-------|---|-------|---|-------|---|-------|---|-------|------|
| Bos_taurus                 | :    | A | A     | T | T     | G | C     | C | A     | G | T     | T | A     | 9439 |
| Hylobates_lar              | :    | C | A     | T | T     | G | C     | C | A     | G | T     | T | A     | 9448 |
| Lemur_catta                | :    | C | A     | T | T     | G | C     | C | A     | G | T     | T | A     | 9445 |
| Nycticebus_coucang         | :    | C | A     | T | T     | G | C     | C | A     | G | T     | T | A     | 9448 |
| Tarsius_bancanus           | :    | C | A     | T | T     | G | C     | C | A     | G | T     | T | A     | 9442 |
| Gorilla_gorilla            | :    | C | A     | T | T     | G | C     | C | A     | G | T     | T | A     | 9448 |
| Homo_sapiens               | :    | C | A     | T | T     | G | C     | C | A     | G | T     | T | A     | 9439 |
| Papio_hamadryas            | :    | C | A     | T | T     | G | C     | C | A     | G | T     | T | A     | 9448 |
| Cebus_albifrons            | :    | C | A     | T | T     | G | C     | C | A     | G | T     | T | A     | 9436 |
| Macaca_sylvanus            | :    | C | A     | T | T     | G | C     | C | A     | G | T     | T | A     | 9445 |
| Pongo_pygmaeus             | :    | C | A     | T | T     | G | C     | C | A     | G | T     | T | A     | 9448 |
| Pan_paniscus               | :    | C | A     | T | T     | G | C     | C | A     | G | T     | T | A     | 9448 |
| Agkistrodon_piscivorus     | :    | C | A     | T | T     | G | C     | C | A     | G | T     | T | A     | 9373 |
| Pantherophis_guttatus      | :    | C | A     | T | T     | G | C     | C | A     | G | T     | T | A     | 9352 |
| Dinodon_semicarinatus      | :    | C | A     | T | T     | G | C     | C | A     | G | T     | T | A     | 9355 |
| Boa_constrictor            | :    | C | A     | T | T     | G | C     | C | A     | G | T     | T | A     | 9403 |
| Python_regius              | :    | C | A     | T | T     | G | C     | C | A     | G | T     | T | A     | 9403 |
| Acrochordus_granulatus     | :    | C | A     | T | T     | G | C     | C | A     | G | T     | T | A     | 9385 |
| Cylindrophis_ruffus        | :    | C | A     | T | T     | G | C     | C | A     | G | T     | T | A     | 9370 |
| Ovophis_okinavensis        | :    | C | A     | T | T     | G | C     | C | A     | G | T     | T | A     | 9373 |
| Xenopeltis_unicolor        | :    | C | A     | T | T     | G | C     | C | A     | G | T     | T | A     | 9409 |
| Typhlops_reticulatus       | :    | C | A     | T | T     | G | C     | C | A     | G | T     | T | A     | 9349 |
| Leptotyphlops_dulcis       | :    | C | A     | T | T     | G | C     | C | A     | G | T     | T | A     | 9359 |
| Caiman_crocodilus          | :    | C | A     | T | T     | G | C     | C | A     | G | T     | T | A     | 9466 |
| Alligator_sinensis         | :    | C | A     | T | T     | G | C     | C | A     | G | T     | T | A     | 9508 |
| Alligator_mississippiensis | :    | C | A     | T | T     | G | C     | C | A     | G | T     | T | A     | 9448 |
| Gavialis_gangeticus        | :    | C | A     | T | T     | G | C     | C | A     | G | T     | T | A     | 9476 |
| Crocodylus_moreletii       | :    | C | A     | T | T     | G | C     | C | A     | G | T     | T | A     | 9452 |
| Dogania_subplana           | :    | C | A     | T | T     | G | C     | C | A     | G | T     | T | A     | 9388 |
| Pelomedusa_subrufa         | :    | C | A     | T | T     | G | C     | C | A     | G | T     | T | A     | 9439 |
| Chrysemys_picta            | :    | C | A     | T | T     | G | C     | C | A     | G | T     | T | A     | 9448 |
| Chelonia_mydas             | :    | C | A     | T | T     | G | C     | C | A     | G | T     | T | A     | 9457 |
| Tinamus_major              | :    | C | A     | T | T     | G | C     | C | A     | G | T     | T | A     | 9436 |
| Smithornis_sharpei         | :    | C | A     | T | T     | G | C     | C | A     | G | T     | T | A     | 9442 |
| Corvus_frugilegus          | :    | C | A     | T | T     | G | C     | C | A     | G | T     | T | A     | 9448 |
| Vidua_chalybeata           | :    | C | A     | T | T     | G | C     | C | A     | G | T     | T | A     | 9448 |
| Buteo_buteo                | :    | C | A     | T | T     | G | C     | C | A     | G | T     | T | A     | 9448 |
| Falco_peregrinus           | :    | C | A     | T | T     | G | C     | C | A     | G | T     | T | A     | 9445 |
| Dromaius_novaeollandiae    | :    | C | A     | T | T     | G | C     | C | A     | G | T     | T | A     | 9439 |
| Struthio_camelus           | :    | C | A     | T | T     | G | C     | C | A     | G | T     | T | A     | 9445 |
| Apteryx_haastii            | :    | C | A     | T | T     | G | C     | C | A     | G | T     | T | A     | 9433 |
| Rhea_americanana           | :    | C | A     | T | T     | G | C     | C | A     | G | T     | T | A     | 9445 |
| Gallus_gallus              | :    | C | A     | T | T     | G | C     | C | A     | G | T     | T | A     | 9442 |
| Ciconia_ciconia            | :    | C | A     | T | T     | G | C     | C | A     | G | T     | T | A     | 9451 |
| Ciconia_boycinana          | :    | C | A     | T | T     | G | C     | C | A     | G | T     | T | A     | 9448 |
| Iguana_iguana              | :    | C | A     | T | T     | G | C     | C | A     | G | T     | T | A     | 9430 |
| Eumeces_egregius           | :    | C | A     | T | T     | G | C     | C | A     | G | T     | T | A     | 9433 |
| Sphenodon_punctatus        | :    | C | A     | T | T     | G | C     | C | A     | G | T     | T | A     | -    |
| Sceloporus_occidentalis    | :    | C | A     | T | T     | G | C     | C | A     | G | T     | T | A     | 9424 |
| Cordylus_warreni           | :    | C | A     | T | T     | G | C     | C | A     | G | T     | T | A     | 9430 |
| Abronia_graminea           | :    | C | A     | T | T     | G | C     | C | A     | G | T     | T | A     | 9439 |
| Shinisaurus_crocodilurus   | :    | C | A     | T | T     | G | C     | C | A     | G | T     | T | A     | 9415 |
| Varanus_komodoensis        | :    | C | A     | T | T     | G | C     | C | A     | G | T     | T | A     | 9454 |
| Rhineura_floridana         | :    | C | A     | T | T     | G | C     | C | A     | G | T     | T | A     | 9412 |
| Geocalamus_acutus          | :    | C | A     | T | T     | G | C     | C | A     | G | T     | T | A     | 9382 |
| Diplometopon_zarudnyi      | :    | C | A     | T | T     | G | C     | C | A     | G | T     | T | A     | 9400 |
| Amphisbaena_schmidti       | :    | C | A     | T | T     | G | C     | C | A     | G | T     | T | A     | 9385 |
| Bipes_tridactylus          | :    | C | A     | T | T     | G | C     | C | A     | G | T     | T | A     | 9385 |
| Bipes_canaliculatus        | :    | C | A     | T | T     | G | C     | C | A     | G | T     | T | A     | 9397 |
| Bipes_biporus              | :    | C | A     | T | T     | G | C     | C | A     | G | T     | T | A     | 9439 |
| Anolis_carolinensis        | :    | C | A     | T | T     | G | C     | C | A     | G | T     | T | A     | 9067 |
| Ophisaurus_atnuatus        | :    | C | A     | T | T     | G | C     | C | A     | G | T     | T | A     | 9059 |
| Varanus_salvator           | :    | C | A     | T | T     | G | C     | C | A     | G | T     | T | A     | 9445 |
| Mertensiella_luschani      | :    | C | A     | T | T     | G | C     | C | A     | G | T     | T | A     | 9451 |
| Xenopus_laevis             | :    | C | A     | T | T     | G | C     | C | A     | G | T     | T | A     | 9442 |

```

*      10120      *      10140      *      10160      *      10180      *      10200      *      10220      *      10240
Bos_taurus      : CCGAGCATTCAAGGGTGGGANGGGCGGGANATATAATTTGAGATAGGAGGATAGGGGAGCAGAGAGCAAACAACAGAGCCCTACANGCAATCTATATAAAGCCGATGGGGACATGGATT : 9572
Hylobates_lar   : TTAACTCTCAAGGGCGGANGGGCGAGGANATATATCTTTTCCAAATGGCGAGGACAGCCCGAGAGAGGCTAACACCGGAGCCACCGGGAACTATATAAAGCCGATGGGGACATGGATT : 9581
Lemur_catta     : TCCAACTTTTATCGGGGGGANGGGAGAGGCATATATATTTTAAATGGGGGGGATAGGGCCGAAACAGAGCAAAATATAGGACAGCCACANGCAATCTATATAAAGCCGATGGGGACATGGATT : 9578
Nycticebus_coucang : TCCAACTTTTATCGGGGGGANGGGAGAGGCATATATATTTTAAATGGGGGGGATAGGGCCGAAACAGAGCAAAATATAGGACAGCCACANGCAATCTATATAAAGCCGATGGGGACATGGATT : 9581
Tarsius_bancanus : TCCAACTTTTATCGGGGGGANGGGAGAGGCATATATATTTTAAATGGGGGGGATAGGGCCGAAACAGAGCAAAATATAGGACAGCCACANGCAATCTATATAAAGCCGATGGGGACATGGATT : 9575
Gorilla_gorilla : TCCAACTTTTATCGGGGGGANGGGAGAGGCATATATATTTTAAATGGGGGGGATAGGGCCGAAACAGAGCAAAATATAGGACAGCCACANGCAATCTATATAAAGCCGATGGGGACATGGATT : 9581
Homo_sapiens    : TCCAACTTTTATCGGGGGGANGGGAGAGGCATATATATTTTAAATGGGGGGGATAGGGCCGAAACAGAGCAAAATATAGGACAGCCACANGCAATCTATATAAAGCCGATGGGGACATGGATT : 9572
Papio_hamadryas : TCCAACTTTTATCGGGGGGANGGGAGAGGCATATATATTTTAAATGGGGGGGATAGGGCCGAAACAGAGCAAAATATAGGACAGCCACANGCAATCTATATAAAGCCGATGGGGACATGGATT : 9581
Cebus_albifrons : TCCAACTTTTATCGGGGGGANGGGAGAGGCATATATATTTTAAATGGGGGGGATAGGGCCGAAACAGAGCAAAATATAGGACAGCCACANGCAATCTATATAAAGCCGATGGGGACATGGATT : 9569
Macaca_sylvanus : TCCAACTTTTATCGGGGGGANGGGAGAGGCATATATATTTTAAATGGGGGGGATAGGGCCGAAACAGAGCAAAATATAGGACAGCCACANGCAATCTATATAAAGCCGATGGGGACATGGATT : 9578
Pongo_pygmaeus  : TCCAACTTTTATCGGGGGGANGGGAGAGGCATATATATTTTAAATGGGGGGGATAGGGCCGAAACAGAGCAAAATATAGGACAGCCACANGCAATCTATATAAAGCCGATGGGGACATGGATT : 9581
Pan_paniscus    : TCCAACTTTTATCGGGGGGANGGGAGAGGCATATATATTTTAAATGGGGGGGATAGGGCCGAAACAGAGCAAAATATAGGACAGCCACANGCAATCTATATAAAGCCGATGGGGACATGGATT : 9581
Agkistrodon_piscivorus : ACCAACTTTTATCGGGGGGANGGGAGAGGCATATATATTTTAAATGGGGGGGATAGGGCCGAAACAGAGCAAAATATAGGACAGCCACANGCAATCTATATAAAGCCGATGGGGACATGGATT : 9506
Pantherophis_guttatus : ACCAACTTTTATCGGGGGGANGGGAGAGGCATATATATTTTAAATGGGGGGGATAGGGCCGAAACAGAGCAAAATATAGGACAGCCACANGCAATCTATATAAAGCCGATGGGGACATGGATT : 9485
Dinodon_semicarinatus : ACCAACTTTTATCGGGGGGANGGGAGAGGCATATATATTTTAAATGGGGGGGATAGGGCCGAAACAGAGCAAAATATAGGACAGCCACANGCAATCTATATAAAGCCGATGGGGACATGGATT : 9488
Boa_constrictor : ACCAACTTTTATCGGGGGGANGGGAGAGGCATATATATTTTAAATGGGGGGGATAGGGCCGAAACAGAGCAAAATATAGGACAGCCACANGCAATCTATATAAAGCCGATGGGGACATGGATT : 9536
Python_regius   : TCCAACTTTTATCGGGGGGANGGGAGAGGCATATATATTTTAAATGGGGGGGATAGGGCCGAAACAGAGCAAAATATAGGACAGCCACANGCAATCTATATAAAGCCGATGGGGACATGGATT : 9536
Acrochordus_granulatus : ACCAACTTTTATCGGGGGGANGGGAGAGGCATATATATTTTAAATGGGGGGGATAGGGCCGAAACAGAGCAAAATATAGGACAGCCACANGCAATCTATATAAAGCCGATGGGGACATGGATT : 9518
Cylindrophis_ruffus : ACCAACTTTTATCGGGGGGANGGGAGAGGCATATATATTTTAAATGGGGGGGATAGGGCCGAAACAGAGCAAAATATAGGACAGCCACANGCAATCTATATAAAGCCGATGGGGACATGGATT : 9503
Ovophis_okinavensis : ACCAACTTTTATCGGGGGGANGGGAGAGGCATATATATTTTAAATGGGGGGGATAGGGCCGAAACAGAGCAAAATATAGGACAGCCACANGCAATCTATATAAAGCCGATGGGGACATGGATT : 9506
Xenopeltis_unicolor : TCCAACTTTTATCGGGGGGANGGGAGAGGCATATATATTTTAAATGGGGGGGATAGGGCCGAAACAGAGCAAAATATAGGACAGCCACANGCAATCTATATAAAGCCGATGGGGACATGGATT : 9542
Typhlops_reticulatus : TCCAACTTTTATCGGGGGGANGGGAGAGGCATATATATTTTAAATGGGGGGGATAGGGCCGAAACAGAGCAAAATATAGGACAGCCACANGCAATCTATATAAAGCCGATGGGGACATGGATT : 9482
Leptotyphlops_dulcis : TCCAACTTTTATCGGGGGGANGGGAGAGGCATATATATTTTAAATGGGGGGGATAGGGCCGAAACAGAGCAAAATATAGGACAGCCACANGCAATCTATATAAAGCCGATGGGGACATGGATT : 9499
Caiman_crocodilus : TCCAACTTTTATCGGGGGGANGGGAGAGGCATATATATTTTAAATGGGGGGGATAGGGCCGAAACAGAGCAAAATATAGGACAGCCACANGCAATCTATATAAAGCCGATGGGGACATGGATT : 9522
Alligator_sinensis : TCCAACTTTTATCGGGGGGANGGGAGAGGCATATATATTTTAAATGGGGGGGATAGGGCCGAAACAGAGCAAAATATAGGACAGCCACANGCAATCTATATAAAGCCGATGGGGACATGGATT : 9641
Alligator_mississippiensis : TCCAACTTTTATCGGGGGGANGGGAGAGGCATATATATTTTAAATGGGGGGGATAGGGCCGAAACAGAGCAAAATATAGGACAGCCACANGCAATCTATATAAAGCCGATGGGGACATGGATT : 9581
Gavialis_gangeticus : TCCAACTTTTATCGGGGGGANGGGAGAGGCATATATATTTTAAATGGGGGGGATAGGGCCGAAACAGAGCAAAATATAGGACAGCCACANGCAATCTATATAAAGCCGATGGGGACATGGATT : 9609
Crocodylus_moreletii : TCCAACTTTTATCGGGGGGANGGGAGAGGCATATATATTTTAAATGGGGGGGATAGGGCCGAAACAGAGCAAAATATAGGACAGCCACANGCAATCTATATAAAGCCGATGGGGACATGGATT : 9585
Dogania_subplana : TCCAACTTTTATCGGGGGGANGGGAGAGGCATATATATTTTAAATGGGGGGGATAGGGCCGAAACAGAGCAAAATATAGGACAGCCACANGCAATCTATATAAAGCCGATGGGGACATGGATT : 9521
Pelomedusa_subrufa : TCCAACTTTTATCGGGGGGANGGGAGAGGCATATATATTTTAAATGGGGGGGATAGGGCCGAAACAGAGCAAAATATAGGACAGCCACANGCAATCTATATAAAGCCGATGGGGACATGGATT : 9572
Chrysemys_picta : TCCAACTTTTATCGGGGGGANGGGAGAGGCATATATATTTTAAATGGGGGGGATAGGGCCGAAACAGAGCAAAATATAGGACAGCCACANGCAATCTATATAAAGCCGATGGGGACATGGATT : 9581
Chelonia_mydas : TCCAACTTTTATCGGGGGGANGGGAGAGGCATATATATTTTAAATGGGGGGGATAGGGCCGAAACAGAGCAAAATATAGGACAGCCACANGCAATCTATATAAAGCCGATGGGGACATGGATT : 9590
Tinamus_major   : TCCAACTTTTATCGGGGGGANGGGAGAGGCATATATATTTTAAATGGGGGGGATAGGGCCGAAACAGAGCAAAATATAGGACAGCCACANGCAATCTATATAAAGCCGATGGGGACATGGATT : 9569
Smithornis_sharpei : TCCAACTTTTATCGGGGGGANGGGAGAGGCATATATATTTTAAATGGGGGGGATAGGGCCGAAACAGAGCAAAATATAGGACAGCCACANGCAATCTATATAAAGCCGATGGGGACATGGATT : 9575
Corvus_frugilegus : TCCAACTTTTATCGGGGGGANGGGAGAGGCATATATATTTTAAATGGGGGGGATAGGGCCGAAACAGAGCAAAATATAGGACAGCCACANGCAATCTATATAAAGCCGATGGGGACATGGATT : 9581
Vidua_chalybeata : TCCAACTTTTATCGGGGGGANGGGAGAGGCATATATATTTTAAATGGGGGGGATAGGGCCGAAACAGAGCAAAATATAGGACAGCCACANGCAATCTATATAAAGCCGATGGGGACATGGATT : 9581
Buteo_buteo     : TCCAACTTTTATCGGGGGGANGGGAGAGGCATATATATTTTAAATGGGGGGGATAGGGCCGAAACAGAGCAAAATATAGGACAGCCACANGCAATCTATATAAAGCCGATGGGGACATGGATT : 9581
Falco_peregrinus : TCCAACTTTTATCGGGGGGANGGGAGAGGCATATATATTTTAAATGGGGGGGATAGGGCCGAAACAGAGCAAAATATAGGACAGCCACANGCAATCTATATAAAGCCGATGGGGACATGGATT : 9578
Dromaius_novaeollandiae : TCCAACTTTTATCGGGGGGANGGGAGAGGCATATATATTTTAAATGGGGGGGATAGGGCCGAAACAGAGCAAAATATAGGACAGCCACANGCAATCTATATAAAGCCGATGGGGACATGGATT : 9572
Struthio_camelus : TCCAACTTTTATCGGGGGGANGGGAGAGGCATATATATTTTAAATGGGGGGGATAGGGCCGAAACAGAGCAAAATATAGGACAGCCACANGCAATCTATATAAAGCCGATGGGGACATGGATT : 9578
Apteryx_haastii : TCCAACTTTTATCGGGGGGANGGGAGAGGCATATATATTTTAAATGGGGGGGATAGGGCCGAAACAGAGCAAAATATAGGACAGCCACANGCAATCTATATAAAGCCGATGGGGACATGGATT : 9566
Rhea_americanana : TCCAACTTTTATCGGGGGGANGGGAGAGGCATATATATTTTAAATGGGGGGGATAGGGCCGAAACAGAGCAAAATATAGGACAGCCACANGCAATCTATATAAAGCCGATGGGGACATGGATT : 9578
Gallus_gallus   : TCCAACTTTTATCGGGGGGANGGGAGAGGCATATATATTTTAAATGGGGGGGATAGGGCCGAAACAGAGCAAAATATAGGACAGCCACANGCAATCTATATAAAGCCGATGGGGACATGGATT : 9575
Ciconia_ciconia : TCCAACTTTTATCGGGGGGANGGGAGAGGCATATATATTTTAAATGGGGGGGATAGGGCCGAAACAGAGCAAAATATAGGACAGCCACANGCAATCTATATAAAGCCGATGGGGACATGGATT : 9584
Ciconia_boyciiana : TCCAACTTTTATCGGGGGGANGGGAGAGGCATATATATTTTAAATGGGGGGGATAGGGCCGAAACAGAGCAAAATATAGGACAGCCACANGCAATCTATATAAAGCCGATGGGGACATGGATT : 9581
Iguana_iguana   : TCCAACTTTTATCGGGGGGANGGGAGAGGCATATATATTTTAAATGGGGGGGATAGGGCCGAAACAGAGCAAAATATAGGACAGCCACANGCAATCTATATAAAGCCGATGGGGACATGGATT : 9563
Fumeaces_egregius : ACCAACTTTTATCGGGGGGANGGGAGAGGCATATATATTTTAAATGGGGGGGATAGGGCCGAAACAGAGCAAAATATAGGACAGCCACANGCAATCTATATAAAGCCGATGGGGACATGGATT : 9566
Sphenodon_punctatus : - : -
Sceloporus_occidentalis : TCCAACTTTTATCGGGGGGANGGGAGAGGCATATATATTTTAAATGGGGGGGATAGGGCCGAAACAGAGCAAAATATAGGACAGCCACANGCAATCTATATAAAGCCGATGGGGACATGGATT : 9572
Cordylus_warreni : TCCAACTTTTATCGGGGGGANGGGAGAGGCATATATATTTTAAATGGGGGGGATAGGGCCGAAACAGAGCAAAATATAGGACAGCCACANGCAATCTATATAAAGCCGATGGGGACATGGATT : 9563
Abronia_graminea : TCCAACTTTTATCGGGGGGANGGGAGAGGCATATATATTTTAAATGGGGGGGATAGGGCCGAAACAGAGCAAAATATAGGACAGCCACANGCAATCTATATAAAGCCGATGGGGACATGGATT : 9572
Shinisaurus_crocodilurus : TCCAACTTTTATCGGGGGGANGGGAGAGGCATATATATTTTAAATGGGGGGGATAGGGCCGAAACAGAGCAAAATATAGGACAGCCACANGCAATCTATATAAAGCCGATGGGGACATGGATT : 9548
Varanus_komodoensis : TCCAACTTTTATCGGGGGGANGGGAGAGGCATATATATTTTAAATGGGGGGGATAGGGCCGAAACAGAGCAAAATATAGGACAGCCACANGCAATCTATATAAAGCCGATGGGGACATGGATT : 9587
Rhinurea_floridana : TCCAACTTTTATCGGGGGGANGGGAGAGGCATATATATTTTAAATGGGGGGGATAGGGCCGAAACAGAGCAAAATATAGGACAGCCACANGCAATCTATATAAAGCCGATGGGGACATGGATT : 9545
Geocalamus_acutus : TCCAACTTTTATCGGGGGGANGGGAGAGGCATATATATTTTAAATGGGGGGGATAGGGCCGAAACAGAGCAAAATATAGGACAGCCACANGCAATCTATATAAAGCCGATGGGGACATGGATT : 9515
Diplometopon_zarudnyi : TCCAACTTTTATCGGGGGGANGGGAGAGGCATATATATTTTAAATGGGGGGGATAGGGCCGAAACAGAGCAAAATATAGGACAGCCACANGCAATCTATATAAAGCCGATGGGGACATGGATT : 9533
Amphisbaena_schmidti : TCCAACTTTTATCGGGGGGANGGGAGAGGCATATATATTTTAAATGGGGGGGATAGGGCCGAAACAGAGCAAAATATAGGACAGCCACANGCAATCTATATAAAGCCGATGGGGACATGGATT : 9518
Bipes_tridactylus : TCCAACTTTTATCGGGGGGANGGGAGAGGCATATATATTTTAAATGGGGGGGATAGGGCCGAAACAGAGCAAAATATAGGACAGCCACANGCAATCTATATAAAGCCGATGGGGACATGGATT : 9518
Bipes_canaliculatus : TCCAACTTTTATCGGGGGGANGGGAGAGGCATATATATTTTAAATGGGGGGGATAGGGCCGAAACAGAGCAAAATATAGGACAGCCACANGCAATCTATATAAAGCCGATGGGGACATGGATT : 9530
Bipes_biporus   : TCCAACTTTTATCGGGGGGANGGGAGAGGCATATATATTTTAAATGGGGGGGATAGGGCCGAAACAGAGCAAAATATAGGACAGCCACANGCAATCTATATAAAGCCGATGGGGACATGGATT : 9572
Anolis_carolinensis : TCCAACTTTTATCGGGGGGANGGGAGAGGCATATATATTTTAAATGGGGGGGATAGGGCCGAAACAGAGCAAAATATAGGACAGCCACANGCAATCTATATAAAGCCGATGGGGACATGGATT : 9200
Ophisaurus_atnuatus : TCCAACTTTTATCGGGGGGANGGGAGAGGCATATATATTTTAAATGGGGGGGATAGGGCCGAAACAGAGCAAAATATAGGACAGCCACANGCAATCTATATAAAGCCGATGGGGACATGGATT : 9192
Varanus_salvator : TCCAACTTTTATCGGGGGGANGGGAGAGGCATATATATTTTAAATGGGGGGGATAGGGCCGAAACAGAGCAAAATATAGGACAGCCACANGCAATCTATATAAAGCCGATGGGGACATGGATT : 9578
Mertensiella_luschani : TCCAACTTTTATCGGGGGGANGGGAGAGGCATATATATTTTAAATGGGGGGGATAGGGCCGAAACAGAGCAAAATATAGGACAGCCACANGCAATCTATATAAAGCCGATGGGGACATGGATT : 9584
Xenopus_laevis  : TCCAACTTTTATCGGGGGGANGGGAGAGGCATATATATTTTAAATGGGGGGGATAGGGCCGAAACAGAGCAAAATATAGGACAGCCACANGCAATCTATATAAAGCCGATGGGGACATGGATT : 9575

```

```

*      10260      *      10280      *      10300      *      10320      *      10340      *      10360      *
Bos_taurus : G A T T T A G C A A T A G C A T G T T C C T A A C N A A T C C T A A A C C C T G N G C C C C A A G A T T C C A T A A A C C C A G C G C C C A
Hylobates_lar : T A T T A G C C C T A G C A G A T T T C C C C C C A A C C C G N G A A C C A C A A A A T A T C C C T A A A C T C C A C C C C A A C
Lemur_catta : G A T T T A G C C A T A G C A G A T T T C C C C C C A A C C C G N G A A C C A C A A A A T A T C C C T A A A C T C C A C C C C A A C
Nycticebus_coucang : T A T T A G C C C C T A G C A G A T T T C C C C C C A A C C C G N G A A C C A C A A A A T A T C C C T A A A C T C C A C C C C A A C
Tarsius_bancanus : G A T T T A G C C A T A G C A G A T T T C C C C C C A A C C C G N G A A C C A C A A A A T A T C C C T A A A C T C C A C C C C A A C
Gorilla_gorilla : G A T T T A G C C C T A G C A G A T T T C C C C C C A A C C C G N G A A C C C A C A A A A T A T C C C T A A A C C C C A C C A A C
Homo_sapiens : G A T T T A G C C C T A G C A G A T T T C C C C C C A A C C C G N G A A C C C A C A A A A T A T C C C T A A A C C C C A C C A A C
Papio_hamadryas : G A T T T A G C C C T A G C A G A T T T C C C C C C A A C C C G N G A A C C C A C A A A A T A T C C C T A A A C C C C A C C A A C
Cebus_albifrons : T A T T A G C C C C T A G C A G A T T T C C C C C C A A C C C G N G A A C C C A C A A A A T A T C C C T A A A C C C C A C C A A C
Macaca_sylvanus : G A T T T A G C C C T A G C A G A T T T C C C C C C A A C C C G N G A A C C C A C A A A A T A T C C C T A A A C C C C A C C A A C
Pongo_pygmaeus : G A T T T A G C C C T A G C A G A T T T C C C C C C A A C C C G N G A A C C C A C A A A A T A T C C C T A A A C C C C A C C A A C
Pan_paniscus : T A T T A G C C C C T A G C A G A T T T C C C C C C A A C C C G N G A A C C C C A A A A A T A T C C C T A A A C C C C A C C A A C
Agkistrodon_piscivorus : C C C C T T A C C C C C C G A A T T A T T A C C C C C C C A A T A A G C A T A C A A G A A C T A C T A A T C A A T T G A A A C A G C C A A C
Pantherophis_guttatus : G A T T A T A C C A C T G C A T G A C T A A T A A C C C C C C A C A A T C A A T A C A A G A A C C C A G C C C A A C C A A C
Dinodon_semicarinatus : T A T T A T A C C A C C C G C A G A T A A T A A C C C C C C A C A A T C A A T A C A A G A A C C T T A A T A C A A C A A G A N G A G T A A C
Boa_constrictor : G A T T A T A C C A C C C G C A G A T A A T A A C C C C C C A C A A T C A A T A C A A G A A A T C C G A C A G A A G A N A C A A C A A C
Python_regius : G A T T A T A C C A C C C G C A G A T A A T A A C C C C C C A C A A T C A A T A C A A G A A C C T T A C A A C A A C A A N G C A A C
Acrochordus_granulatus : T A T T A T A C C A C C C G C A G A T A A T A A C C C C C C A C A A T C A A T A C A A G A A C C T T A C A A C A A C A A A A T A A C
Cylindrophis_ruffus : G A T T A T A C C A C C C G C A G A T A A T A A C C C C C C A C A A T C A A T A C A A G A A C C T T A C A A C A A A A T A A G C
Ovophis_okinavensis : T A T T A T A C C C C C C G C A G A T A A T A A C C C C C C A C A A T C A A T A C A A G A A C C T T A C A A C A A A A G G C A A C
Xenopeltis_unicolor : G A T T T G C T A C A G C C C G A T A A T A C C C A A C C C A T A A C A A G A A C T A T T T C A C A A C A A N G A N G A T A A T
Typhlops_reticulatus : A C T A T A A C C A T T C G A C T G A A C A C C A A C A G C C T G G A A C C A A G A A A T C C G C A A A C A A A C C A C C A T A G
Leptotyphlops_dulcis : G A T T T G C C C T A G C A G A T T T C C C C C C A C C C C C C A A C C C C C C C C C C C C C C C C C C C C C C C C C C C C C C C C C
Caiman_crocodilus : C C C A C C C C C C T A C A A T A G C C A C C T A A C C C C C C C C C C C C C C C C C C C C C C C C C C C C C C C C C C C C C C C C
Alligator_sinensis : A C C C C C C C G A T T T C A T G A A T G C C C C C C C C C C C C C C C C C C C C C C C C C C C C C C C C C C C C C C C C C C C C C C C
Alligator_mississippiensis : A C C C C C C C T A T A T C A A T G C C C C C C C C C C C C C C C C C C C C C C C C C C C C C C C C C C C C C C C C C C C C C C C C C
Gavialis_gangeticus : A G C A A T C C C C C T A G C A G A T T A G C C C C C C C C C C C C C C C C C C C C C C C C C C C C C C C C C C C C C C C C C C C C C C
Crocodylus_moreletii : A G T A T C C C C C C C C C C C C C C C C C C C C C C C C C C C C C C C C C C C C C C C C C C C C C C C C C C C C C C C C C C C C C C
Dogania_subplana : A A A T C G G C A T A G C C G A A T A C A A A A C C A A A C C T G A G A A C C A A C A A A C C C C C C C C C C C C C C C C C C C C C C C C
Pelomedusa_subrufa : A A T C C C C C C C A A G A G C A T A A T A G C C C C C C C C C C C C C C C C C C C C C C C C C C C C C C C C C C C C C C C C C C
Chrysemys_picta : A A T C C C C C C C A A G A G C A T A A T A G C C C C C C C C C C C C C C C C C C C C C C C C C C C C C C C C C C C C C C C C C C
Chelonia_mydas : A A T C C C C C C C A A G A G C A T A A T A G C C C C C C C C C C C C C C C C C C C C C C C C C C C C C C C C C C C C C C C C C C
Tinamus_major : G A T T A T C C C A T A G C A G A T T T C C C C C C A A C C C C C C C C C C C C C C C C C C C C C C C C C C C C C C C C C C C C C C C C
Smithornis_sharpei : T A T T C C C C C C T A G C A G A T T T C C C C C C A A C C C C C C C C C C C C C C C C C C C C C C C C C C C C C C C C C C C C C C
Corvus_frugilegus : G A T T C C C C C C T A G C A G A T T T C C C C C C A A C C C C C C C C C C C C C C C C C C C C C C C C C C C C C C C C C C C C C C
Vidua_chalybeata : G A T T C C C C C C T A G C A G A T T T C C C C C C A A C C C C C C C C C C C C C C C C C C C C C C C C C C C C C C C C C C C C C C
Buteo_buteo : G A T T C C C C C C T A G C A G A T T T C C C C C C A A C C C C C C C C C C C C C C C C C C C C C C C C C C C C C C C C C C C C C C
Falco_peregrinus : G A T T C C C C C C T A G C A G A T T T C C C C C C A A C C C C C C C C C C C C C C C C C C C C C C C C C C C C C C C C C C C C C C
Dromaius_novaeollandiae : G A T T C C C C C C T A G C A G A T T T C C C C C C A A C C C C C C C C C C C C C C C C C C C C C C C C C C C C C C C C C C C C C C
Struthio_camelus : G A T T C C C C C C T A G C A G A T T T C C C C C C A A C C C C C C C C C C C C C C C C C C C C C C C C C C C C C C C C C C C C C C
Apteryx_haastii : G A T T C C C C C C T A G C A G A T T T C C C C C C A A C C C C C C C C C C C C C C C C C C C C C C C C C C C C C C C C C C C C C C
Rhea_americanana : A A C C C C C C C C T A G C A G A T T T C C C C C C A A C C C C C C C C C C C C C C C C C C C C C C C C C C C C C C C C C C C C
Gallus_gallus : G A T T C C C C C C T A G C A G A T T T C C C C C C A A C C C C C C C C C C C C C C C C C C C C C C C C C C C C C C C C C C C C C C
Ciconia_ciconia : T A T T C C C C C C T A G C A G A T T T C C C C C C A A C C C C C C C C C C C C C C C C C C C C C C C C C C C C C C C C C C C C C C
Ciconia_boycciana : T A T T C C C C C C T A G C A G A T T T C C C C C C A A C C C C C C C C C C C C C C C C C C C C C C C C C C C C C C C C C C C C C C
Iguana_iguana : A C C T T A A C C A C A C A G A T T T C C A A T A A C C C C A A C C C C C C C C C C C C C C C C C C C C C C C C C C C C C C C C C C C C
Eumeces_egregius : A A T T T T C C C A T A C A G A T T T C C A A C C C C C A A C C C C C C C C C C C C C C C C C C C C C C C C C C C C C C C C C C C C
Sphenodon_punctatus :
Sceloporus_occidentalis : A A T T A T A C C A A T G C A G A T T T C C C A A A C C C C A A C C C C C C C C C C C C C C C C C C C C C C C C C C C C C C C C C C C C
Cordylus_warreni : A A T T A T A C C C T A G C C G A C T A G C C A T A T C G C C C C C C C C C C C C C C C C C C C C C C C C C C C C C C C C C C C C C C C
Abronia_graminea : A A T C C C A C A T A G C C G A T T A G C C A T A A A C C C C A A C C C C C C C C C C C C C C C C C C C C C C C C C C C C C C C C C C C C C
Shinisaurus_crocodilurus : A A T G A T T A C A A T G C C G A C T A G C C A T A A A T T C C A C A C C C C C C C C C C C C C C C C C C C C C C C C C C C C C C C C C C C C
Varanus_komodoensis : T A T C C C A C T A G C C G A C T C C C A C C A C C C C A A C C C C C C C C C C C C C C C C C C C C C C C C C C C C C C C C C C C C C C C
Rhineura_floridana : T A T A G C C A A T G C C G A C T T G C C A T C C A A C C C C C C C C C C C C C C C C C C C C C C C C C C C C C C C C C C C C C C C C C
Geocalamus_acutus : A T T A A T C C C C C C G A T G A C T A G C C A A C C C C C C C C C C C C C C C C C C C C C C C C C C C C C C C C C C C C C C C C C C C
Diplometopon_zarudnyi : A C C A A T A C T A T A G C C G A C T G C C C C C A A C C C C C C C C C C C C C C C C C C C C C C C C C C C C C C C C C C C C C C C C C C C
Amphisbaena_schmidti : T A T T A A T A C C C C C C C C C C C C C C C C C C C C C C C C C C C C C C C C C C C C C C C C C C C C C C C C C C C C C C C C C C C C C C
Bipes_tridactylus : G C C T A T A G C A A T A G C C A T T A T T A C C C C C C C C C C C C C C C C C C C C C C C C C C C C C C C C C C C C C C C C C C C
Bipes_capaliculatus : A C C T C C G C A A C G A C T A A T A G C C C C C C C C C C C C C C C C C C C C C C C C C C C C C C C C C C C C C C C C C C C C C C
Bipes_banani : G C C T T A G C C A A T A G C C C C C C C C C C C C C C C C C C C C C C C C C C C C C C C C C C C C C C C C C C C C C C C C C C
Anolis_carolinensis : A A T C C T A A A A T G C G G C C C C A A A A C C C C C C C C C C C C C C C C C C C C C C C C C C C C C C C C C C C C C C C C C C C
Ophisaurus_atnuatus : A A C C C C C C C C C C C C C C C C C C C C C C C C C C C C C C C C C C C C C C C C C C C C C C C C C C C C C C C C C C C C C C
Varanus_salvator : T A T C C C C C C C C C C C C C C C C C C C C C C C C C C C C C C C C C C C C C C C C C C C C C C C C C C C C C C C C C C C C C C
Mertensiella_luschani : A A T T A T G C A T G C A G A T T T A A A A C C A A C C C C C C C C C C C C C C C C C C C C C C C C C C C C C C C C C C C C C C C C C
Xenopus_laevis : A A T C C T A G C A T A G C A G G C A A A C C A A C C C C C C C C C C C C C C C C C C C C C C C C C C C C C C C C C C C C C C C C C

```

|                                   |       |                      |                          |              |                         |                |                 |      |       |   |       |   |       |        |
|-----------------------------------|-------|----------------------|--------------------------|--------------|-------------------------|----------------|-----------------|------|-------|---|-------|---|-------|--------|
|                                   | 10380 | *                    | 10400                    | *            | 10420                   | *              | 10440           | *    | 10460 | * | 10480 | * | 10500 |        |
| <i>Bos_taurus</i>                 | :     | CGCCCAATTGGCCACACCCG | GAATCCCGAGCAATAGAAAGGGCC | AAACCCCGTTCG | CGCAATCCCAATCAGACCAATAG | GGAGAGGAAATCCG | CAACCGCAACCCCTC | CAAG |       |   |       |   |       | : 9829 |
| <i>Hylobates_lar</i>              | :     | CGCCCAATTGGCCACACCCG | GAATCCCGAGCAATAGAAAGGGCC | AAACCCCGTTCG | CGCAATCCCAATCAGACCAATAG | GGAGAGGAAATCCG | CAACCGCAACCCCTC | CAAG |       |   |       |   |       | : 9838 |
| <i>Lemur_catta</i>                | :     | CGCCCAATTGGCCACACCCG | GAATCCCGAGCAATAGAAAGGGCC | AAACCCCGTTCG | CGCAATCCCAATCAGACCAATAG | GGAGAGGAAATCCG | CAACCGCAACCCCTC | CAAG |       |   |       |   |       | : 9835 |
| <i>Nycticebus_coucang</i>         | :     | CGCCCAATTGGCCACACCCG | GAATCCCGAGCAATAGAAAGGGCC | AAACCCCGTTCG | CGCAATCCCAATCAGACCAATAG | GGAGAGGAAATCCG | CAACCGCAACCCCTC | CAAG |       |   |       |   |       | : 9838 |
| <i>Tarsius_bancanus</i>           | :     | CGCCCAATTGGCCACACCCG | GAATCCCGAGCAATAGAAAGGGCC | AAACCCCGTTCG | CGCAATCCCAATCAGACCAATAG | GGAGAGGAAATCCG | CAACCGCAACCCCTC | CAAG |       |   |       |   |       | : 9832 |
| <i>Gorilla_gorilla</i>            | :     | CGCCCAATTGGCCACACCCG | GAATCCCGAGCAATAGAAAGGGCC | AAACCCCGTTCG | CGCAATCCCAATCAGACCAATAG | GGAGAGGAAATCCG | CAACCGCAACCCCTC | CAAG |       |   |       |   |       | : 9838 |
| <i>Homo_sapiens</i>               | :     | CGCCCAATTGGCCACACCCG | GAATCCCGAGCAATAGAAAGGGCC | AAACCCCGTTCG | CGCAATCCCAATCAGACCAATAG | GGAGAGGAAATCCG | CAACCGCAACCCCTC | CAAG |       |   |       |   |       | : 9829 |
| <i>Papio_hamadryas</i>            | :     | CGCCCAATTGGCCACACCCG | GAATCCCGAGCAATAGAAAGGGCC | AAACCCCGTTCG | CGCAATCCCAATCAGACCAATAG | GGAGAGGAAATCCG | CAACCGCAACCCCTC | CAAG |       |   |       |   |       | : 9838 |
| <i>Cebus_albifrons</i>            | :     | CGCCCAATTGGCCACACCCG | GAATCCCGAGCAATAGAAAGGGCC | AAACCCCGTTCG | CGCAATCCCAATCAGACCAATAG | GGAGAGGAAATCCG | CAACCGCAACCCCTC | CAAG |       |   |       |   |       | : 9826 |
| <i>Macaca_sylvanus</i>            | :     | CGCCCAATTGGCCACACCCG | GAATCCCGAGCAATAGAAAGGGCC | AAACCCCGTTCG | CGCAATCCCAATCAGACCAATAG | GGAGAGGAAATCCG | CAACCGCAACCCCTC | CAAG |       |   |       |   |       | : 9835 |
| <i>Pongo_pygmaeus</i>             | :     | CGCCCAATTGGCCACACCCG | GAATCCCGAGCAATAGAAAGGGCC | AAACCCCGTTCG | CGCAATCCCAATCAGACCAATAG | GGAGAGGAAATCCG | CAACCGCAACCCCTC | CAAG |       |   |       |   |       | : 9838 |
| <i>Pan_paniscus</i>               | :     | CGCCCAATTGGCCACACCCG | GAATCCCGAGCAATAGAAAGGGCC | AAACCCCGTTCG | CGCAATCCCAATCAGACCAATAG | GGAGAGGAAATCCG | CAACCGCAACCCCTC | CAAG |       |   |       |   |       | : 9838 |
| <i>Agkistrodon_piscivorus</i>     | :     | CGCCCAATTGGCCACACCCG | GAATCCCGAGCAATAGAAAGGGCC | AAACCCCGTTCG | CGCAATCCCAATCAGACCAATAG | GGAGAGGAAATCCG | CAACCGCAACCCCTC | CAAG |       |   |       |   |       | : 9760 |
| <i>Pantherophis_guttatus</i>      | :     | CGCCCAATTGGCCACACCCG | GAATCCCGAGCAATAGAAAGGGCC | AAACCCCGTTCG | CGCAATCCCAATCAGACCAATAG | GGAGAGGAAATCCG | CAACCGCAACCCCTC | CAAG |       |   |       |   |       | : 9739 |
| <i>Dinodon_semicarinatus</i>      | :     | CGCCCAATTGGCCACACCCG | GAATCCCGAGCAATAGAAAGGGCC | AAACCCCGTTCG | CGCAATCCCAATCAGACCAATAG | GGAGAGGAAATCCG | CAACCGCAACCCCTC | CAAG |       |   |       |   |       | : 9742 |
| <i>Boa_constrictor</i>            | :     | CGCCCAATTGGCCACACCCG | GAATCCCGAGCAATAGAAAGGGCC | AAACCCCGTTCG | CGCAATCCCAATCAGACCAATAG | GGAGAGGAAATCCG | CAACCGCAACCCCTC | CAAG |       |   |       |   |       | : 9790 |
| <i>Python_regius</i>              | :     | CGCCCAATTGGCCACACCCG | GAATCCCGAGCAATAGAAAGGGCC | AAACCCCGTTCG | CGCAATCCCAATCAGACCAATAG | GGAGAGGAAATCCG | CAACCGCAACCCCTC | CAAG |       |   |       |   |       | : 9790 |
| <i>Acrochordus_granulatus</i>     | :     | CGCCCAATTGGCCACACCCG | GAATCCCGAGCAATAGAAAGGGCC | AAACCCCGTTCG | CGCAATCCCAATCAGACCAATAG | GGAGAGGAAATCCG | CAACCGCAACCCCTC | CAAG |       |   |       |   |       | : 9772 |
| <i>Cylindrophis_ruffus</i>        | :     | CGCCCAATTGGCCACACCCG | GAATCCCGAGCAATAGAAAGGGCC | AAACCCCGTTCG | CGCAATCCCAATCAGACCAATAG | GGAGAGGAAATCCG | CAACCGCAACCCCTC | CAAG |       |   |       |   |       | : 9757 |
| <i>Ovophis_okinavensis</i>        | :     | CGCCCAATTGGCCACACCCG | GAATCCCGAGCAATAGAAAGGGCC | AAACCCCGTTCG | CGCAATCCCAATCAGACCAATAG | GGAGAGGAAATCCG | CAACCGCAACCCCTC | CAAG |       |   |       |   |       | : 9760 |
| <i>Xenopeltis_unicolor</i>        | :     | CGCCCAATTGGCCACACCCG | GAATCCCGAGCAATAGAAAGGGCC | AAACCCCGTTCG | CGCAATCCCAATCAGACCAATAG | GGAGAGGAAATCCG | CAACCGCAACCCCTC | CAAG |       |   |       |   |       | : 9796 |
| <i>Typhlops_reticulatus</i>       | :     | CGCCCAATTGGCCACACCCG | GAATCCCGAGCAATAGAAAGGGCC | AAACCCCGTTCG | CGCAATCCCAATCAGACCAATAG | GGAGAGGAAATCCG | CAACCGCAACCCCTC | CAAG |       |   |       |   |       | : 9736 |
| <i>Leptotyphlops_dulcis</i>       | :     | CGCCCAATTGGCCACACCCG | GAATCCCGAGCAATAGAAAGGGCC | AAACCCCGTTCG | CGCAATCCCAATCAGACCAATAG | GGAGAGGAAATCCG | CAACCGCAACCCCTC | CAAG |       |   |       |   |       | : 9746 |
| <i>Caiman_crocodilus</i>          | :     | CGCCCAATTGGCCACACCCG | GAATCCCGAGCAATAGAAAGGGCC | AAACCCCGTTCG | CGCAATCCCAATCAGACCAATAG | GGAGAGGAAATCCG | CAACCGCAACCCCTC | CAAG |       |   |       |   |       | : 9853 |
| <i>Alligator_sinensis</i>         | :     | CGCCCAATTGGCCACACCCG | GAATCCCGAGCAATAGAAAGGGCC | AAACCCCGTTCG | CGCAATCCCAATCAGACCAATAG | GGAGAGGAAATCCG | CAACCGCAACCCCTC | CAAG |       |   |       |   |       | : 9895 |
| <i>Alligator_mississippiensis</i> | :     | CGCCCAATTGGCCACACCCG | GAATCCCGAGCAATAGAAAGGGCC | AAACCCCGTTCG | CGCAATCCCAATCAGACCAATAG | GGAGAGGAAATCCG | CAACCGCAACCCCTC | CAAG |       |   |       |   |       | : 9835 |
| <i>Gavialis_gangeticus</i>        | :     | CGCCCAATTGGCCACACCCG | GAATCCCGAGCAATAGAAAGGGCC | AAACCCCGTTCG | CGCAATCCCAATCAGACCAATAG | GGAGAGGAAATCCG | CAACCGCAACCCCTC | CAAG |       |   |       |   |       | : 9863 |
| <i>Crocodylus_moreletii</i>       | :     | CGCCCAATTGGCCACACCCG | GAATCCCGAGCAATAGAAAGGGCC | AAACCCCGTTCG | CGCAATCCCAATCAGACCAATAG | GGAGAGGAAATCCG | CAACCGCAACCCCTC | CAAG |       |   |       |   |       | : 9839 |
| <i>Dogania_subplana</i>           | :     | CGCCCAATTGGCCACACCCG | GAATCCCGAGCAATAGAAAGGGCC | AAACCCCGTTCG | CGCAATCCCAATCAGACCAATAG | GGAGAGGAAATCCG | CAACCGCAACCCCTC | CAAG |       |   |       |   |       | : 9778 |
| <i>Pelomedusa_subrufa</i>         | :     | CGCCCAATTGGCCACACCCG | GAATCCCGAGCAATAGAAAGGGCC | AAACCCCGTTCG | CGCAATCCCAATCAGACCAATAG | GGAGAGGAAATCCG | CAACCGCAACCCCTC | CAAG |       |   |       |   |       | : 9829 |
| <i>Chrysemys_picta</i>            | :     | CGCCCAATTGGCCACACCCG | GAATCCCGAGCAATAGAAAGGGCC | AAACCCCGTTCG | CGCAATCCCAATCAGACCAATAG | GGAGAGGAAATCCG | CAACCGCAACCCCTC | CAAG |       |   |       |   |       | : 9835 |
| <i>Chelonia_mydas</i>             | :     | CGCCCAATTGGCCACACCCG | GAATCCCGAGCAATAGAAAGGGCC | AAACCCCGTTCG | CGCAATCCCAATCAGACCAATAG | GGAGAGGAAATCCG | CAACCGCAACCCCTC | CAAG |       |   |       |   |       | : 9847 |
| <i>Tinanus_major</i>              | :     | CGCCCAATTGGCCACACCCG | GAATCCCGAGCAATAGAAAGGGCC | AAACCCCGTTCG | CGCAATCCCAATCAGACCAATAG | GGAGAGGAAATCCG | CAACCGCAACCCCTC | CAAG |       |   |       |   |       | : 9820 |
| <i>Smithornis_sharpei</i>         | :     | CGCCCAATTGGCCACACCCG | GAATCCCGAGCAATAGAAAGGGCC | AAACCCCGTTCG | CGCAATCCCAATCAGACCAATAG | GGAGAGGAAATCCG | CAACCGCAACCCCTC | CAAG |       |   |       |   |       | : 9826 |
| <i>Corvus_frugilegus</i>          | :     | CGCCCAATTGGCCACACCCG | GAATCCCGAGCAATAGAAAGGGCC | AAACCCCGTTCG | CGCAATCCCAATCAGACCAATAG | GGAGAGGAAATCCG | CAACCGCAACCCCTC | CAAG |       |   |       |   |       | : 9835 |
| <i>Vidua_chalybeata</i>           | :     | CGCCCAATTGGCCACACCCG | GAATCCCGAGCAATAGAAAGGGCC | AAACCCCGTTCG | CGCAATCCCAATCAGACCAATAG | GGAGAGGAAATCCG | CAACCGCAACCCCTC | CAAG |       |   |       |   |       | : 9835 |
| <i>Buteo_buteo</i>                | :     | CGCCCAATTGGCCACACCCG | GAATCCCGAGCAATAGAAAGGGCC | AAACCCCGTTCG | CGCAATCCCAATCAGACCAATAG | GGAGAGGAAATCCG | CAACCGCAACCCCTC | CAAG |       |   |       |   |       | : 9835 |
| <i>Falco_peregrinus</i>           | :     | CGCCCAATTGGCCACACCCG | GAATCCCGAGCAATAGAAAGGGCC | AAACCCCGTTCG | CGCAATCCCAATCAGACCAATAG | GGAGAGGAAATCCG | CAACCGCAACCCCTC | CAAG |       |   |       |   |       | : 9832 |
| <i>Dromaius_novaeollandiae</i>    | :     | CGCCCAATTGGCCACACCCG | GAATCCCGAGCAATAGAAAGGGCC | AAACCCCGTTCG | CGCAATCCCAATCAGACCAATAG | GGAGAGGAAATCCG | CAACCGCAACCCCTC | CAAG |       |   |       |   |       | : 9826 |
| <i>Struthio_camelus</i>           | :     | CGCCCAATTGGCCACACCCG | GAATCCCGAGCAATAGAAAGGGCC | AAACCCCGTTCG | CGCAATCCCAATCAGACCAATAG | GGAGAGGAAATCCG | CAACCGCAACCCCTC | CAAG |       |   |       |   |       | : 9832 |
| <i>Apteryx_haastii</i>            | :     | CGCCCAATTGGCCACACCCG | GAATCCCGAGCAATAGAAAGGGCC | AAACCCCGTTCG | CGCAATCCCAATCAGACCAATAG | GGAGAGGAAATCCG | CAACCGCAACCCCTC | CAAG |       |   |       |   |       | : 9820 |
| <i>Rhea_americana</i>             | :     | CGCCCAATTGGCCACACCCG | GAATCCCGAGCAATAGAAAGGGCC | AAACCCCGTTCG | CGCAATCCCAATCAGACCAATAG | GGAGAGGAAATCCG | CAACCGCAACCCCTC | CAAG |       |   |       |   |       | : 9832 |
| <i>Gallus_gallus</i>              | :     | CGCCCAATTGGCCACACCCG | GAATCCCGAGCAATAGAAAGGGCC | AAACCCCGTTCG | CGCAATCCCAATCAGACCAATAG | GGAGAGGAAATCCG | CAACCGCAACCCCTC | CAAG |       |   |       |   |       | : 9829 |
| <i>Ciconia_ciconia</i>            | :     | CGCCCAATTGGCCACACCCG | GAATCCCGAGCAATAGAAAGGGCC | AAACCCCGTTCG | CGCAATCCCAATCAGACCAATAG | GGAGAGGAAATCCG | CAACCGCAACCCCTC | CAAG |       |   |       |   |       | : 9835 |
| <i>Ciconia_boycciana</i>          | :     | CGCCCAATTGGCCACACCCG | GAATCCCGAGCAATAGAAAGGGCC | AAACCCCGTTCG | CGCAATCCCAATCAGACCAATAG | GGAGAGGAAATCCG | CAACCGCAACCCCTC | CAAG |       |   |       |   |       | : 9832 |
| <i>Iguana_iguana</i>              | :     | CGCCCAATTGGCCACACCCG | GAATCCCGAGCAATAGAAAGGGCC | AAACCCCGTTCG | CGCAATCCCAATCAGACCAATAG | GGAGAGGAAATCCG | CAACCGCAACCCCTC | CAAG |       |   |       |   |       | : 9817 |
| <i>Eumeces_egregius</i>           | :     | CGCCCAATTGGCCACACCCG | GAATCCCGAGCAATAGAAAGGGCC | AAACCCCGTTCG | CGCAATCCCAATCAGACCAATAG | GGAGAGGAAATCCG | CAACCGCAACCCCTC | CAAG |       |   |       |   |       | : 9823 |
| <i>Sphenodon_punctatus</i>        | :     | CGCCCAATTGGCCACACCCG | GAATCCCGAGCAATAGAAAGGGCC | AAACCCCGTTCG | CGCAATCCCAATCAGACCAATAG | GGAGAGGAAATCCG | CAACCGCAACCCCTC | CAAG |       |   |       |   |       | : -    |
| <i>Sceloporus_occidentalis</i>    | :     | CGCCCAATTGGCCACACCCG | GAATCCCGAGCAATAGAAAGGGCC | AAACCCCGTTCG | CGCAATCCCAATCAGACCAATAG | GGAGAGGAAATCCG | CAACCGCAACCCCTC | CAAG |       |   |       |   |       | : 9811 |
| <i>Cordylus_warreni</i>           | :     | CGCCCAATTGGCCACACCCG | GAATCCCGAGCAATAGAAAGGGCC | AAACCCCGTTCG | CGCAATCCCAATCAGACCAATAG | GGAGAGGAAATCCG | CAACCGCAACCCCTC | CAAG |       |   |       |   |       | : 9820 |
| <i>Abronia_graminea</i>           | :     | CGCCCAATTGGCCACACCCG | GAATCCCGAGCAATAGAAAGGGCC | AAACCCCGTTCG | CGCAATCCCAATCAGACCAATAG | GGAGAGGAAATCCG | CAACCGCAACCCCTC | CAAG |       |   |       |   |       | : 9829 |
| <i>Shinisaurus_crocodilurus</i>   | :     | CGCCCAATTGGCCACACCCG | GAATCCCGAGCAATAGAAAGGGCC | AAACCCCGTTCG | CGCAATCCCAATCAGACCAATAG | GGAGAGGAAATCCG | CAACCGCAACCCCTC | CAAG |       |   |       |   |       | : 9805 |
| <i>Varanus_komodoensis</i>        | :     | CGCCCAATTGGCCACACCCG | GAATCCCGAGCAATAGAAAGGGCC | AAACCCCGTTCG | CGCAATCCCAATCAGACCAATAG | GGAGAGGAAATCCG | CAACCGCAACCCCTC | CAAG |       |   |       |   |       | : 9844 |
| <i>Rhineura_floridana</i>         | :     | CGCCCAATTGGCCACACCCG | GAATCCCGAGCAATAGAAAGGGCC | AAACCCCGTTCG | CGCAATCCCAATCAGACCAATAG | GGAGAGGAAATCCG | CAACCGCAACCCCTC | CAAG |       |   |       |   |       | : 9802 |
| <i>Geocalamus_acutus</i>          | :     | CGCCCAATTGGCCACACCCG | GAATCCCGAGCAATAGAAAGGGCC | AAACCCCGTTCG | CGCAATCCCAATCAGACCAATAG | GGAGAGGAAATCCG | CAACCGCAACCCCTC | CAAG |       |   |       |   |       | : 9772 |
| <i>Diplometopon_zarudnyi</i>      | :     | CGCCCAATTGGCCACACCCG | GAATCCCGAGCAATAGAAAGGGCC | AAACCCCGTTCG | CGCAATCCCAATCAGACCAATAG | GGAGAGGAAATCCG | CAACCGCAACCCCTC | CAAG |       |   |       |   |       | : 9790 |
| <i>Amphisbaena_schmidti</i>       | :     | CGCCCAATTGGCCACACCCG | GAATCCCGAGCAATAGAAAGGGCC | AAACCCCGTTCG | CGCAATCCCAATCAGACCAATAG | GGAGAGGAAATCCG | CAACCGCAACCCCTC | CAAG |       |   |       |   |       | : 9775 |
| <i>Bipes_tridactylus</i>          | :     | CGCCCAATTGGCCACACCCG | GAATCCCGAGCAATAGAAAGGGCC | AAACCCCGTTCG | CGCAATCCCAATCAGACCAATAG | GGAGAGGAAATCCG | CAACCGCAACCCCTC | CAAG |       |   |       |   |       | : 9775 |
| <i>Bipes_canaliculatus</i>        | :     | CGCCCAATTGGCCACACCCG | GAATCCCGAGCAATAGAAAGGGCC | AAACCCCGTTCG | CGCAATCCCAATCAGACCAATAG | GGAGAGGAAATCCG | CAACCGCAACCCCTC | CAAG |       |   |       |   |       | : 9787 |
| <i>Bipes_biporus</i>              | :     | CGCCCAATTGGCCACACCCG | GAATCCCGAGCAATAGAAAGGGCC | AAACCCCGTTCG | CGCAATCCCAATCAGACCAATAG | GGAGAGGAAATCCG | CAACCGCAACCCCTC | CAAG |       |   |       |   |       | : 9829 |
| <i>Anolis_carolinensis</i>        | :     | CGCCCAATTGGCCACACCCG | GAATCCCGAGCAATAGAAAGGGCC | AAACCCCGTTCG | CGCAATCCCAATCAGACCAATAG | GGAGAGGAAATCCG | CAACCGCAACCCCTC | CAAG |       |   |       |   |       | : 9439 |
| <i>Ophisaurus_attuatus</i>        | :     | CGCCCAATTGGCCACACCCG | GAATCCCGAGCAATAGAAAGGGCC | AAACCCCGTTCG | CGCAATCCCAATCAGACCAATAG | GGAGAGGAAATCCG | CAACCGCAACCCCTC | CAAG |       |   |       |   |       | : 9449 |
| <i>Varanus_salvator</i>           | :     | CGCCCAATTGGCCACACCCG | GAATCCCGAGCAATAGAAAGGGCC | AAACCCCGTTCG | CGCAATCCCAATCAGACCAATAG | GGAGAGGAAATCCG | CAACCGCAACCCCTC | CAAG |       |   |       |   |       | : 9835 |
| <i>Mertensiella_luschani</i>      | :     | CGCCCAATTGGCCACACCCG | GAATCCCGAGCAATAGAAAGGGCC | AAACCCCGTTCG | CGCAATCCCAATCAGACCAATAG | GGAGAGGAAATCCG | CAACCGCAACCCCTC | CAAG |       |   |       |   |       | : 9841 |
| <i>Xenopus_laevis</i>             | :     | CGCCCAATTGGCCACACCCG | GAATCCCGAGCAATAGAAAGGGCC | AAACCCCGTTCG | CGCAATCCCAATCAGACCAATAG | GGAGAGGAAATCCG | CAACCGCAACCCCTC | CAAG |       |   |       |   |       | : 9832 |

```

*      10520      *      10540      *      10560      *      10580      *      10600      *      10620      *      10640
Bos_taurus      : AANA... 9962
Hylobates_lar  : AANA... 9971
Lemur_catta    : AANA... 9968
Nycticebus_cou : AAAC... 9971
Tarsius_banca : AAAT... 9965
Gorilla_gorilla : AAAA... 9971
Homo_sapiens   : AAAA... 9962
Papio_hamadry : AAAA... 9971
Cebus_albifrons : AAAA... 9959
Macaca_sylvanus : AAGC... 9968
Pongo_pygmaeus : AAAA... 9971
Pan_paniscus   : AAAA... 9971
Agkistrodon_piscivorus : ACAA... 9893
Pantherophis_guttatus : AAAC... 9872
Dinodon_semicarinatus : ACAT... 9875
Boa_constrictor : AANA... 9923
Python_regius  : AANA... 9923
Acrochordus_granulatus : AAAA... 9905
Cylindrophis_ruffus : AAAA... 9887
Ovophis_okinavensis : ACAC... 9890
Xenopeltis_unicolor : AAAA... 9929
Typhlops_reticulatus : AANA... 9869
Leptotyphlops_dulcis : AAAC... 9879
Caiman_crocodylus : AAGT... 9986
Alligator_sinensis : AAGC... 10028
Alligator_mississippiensis : ATAG... 9968
Gavialis_gangeticus : ATAG... 9996
Crocodylus_moreletii : AAGC... 9972
Dogania_subplana : CCAC... 9911
Pelomedusa_subrufa : CA... 9962
Chrysemys_picta : CC... 9968
Chelonia_mydas : CC... 9980
Tinamus_major : CC... 9953
Smithornis_sharpei : CC... 9959
Corvus_frugilegus : CC... 9968
Vidua_chalybeata : CC... 9968
Buteo_buteo    : CC... 9965
Falco_peregrinus : CC... 9959
Dromaius_novaeollandiae : CC... 9965
Struthio_camelus : CC... 9953
Apteryx_haastii : CC... 9965
Rhea_american : CC... 9962
Gallus_gallus : CC... 9968
Ciconia_ciconia : CC... 9965
Ciconia_boyceana : CC... 9950
Iguana_iguana  : AAAC... 9956
Fumees_egregius : AAAC... 9956
Sphenodon_punctatus : -
Sceloporus_occidentalis : AAAC... 9944
Cordylus_warreni : AAAC... 9953
Abronia_graminea : AAAC... 9962
Shinisaurus_crocodylurus : AAAC... 9938
Varanus_komodoensis : AAAC... 9977
Rhineura_floridana : AAAC... 9935
Geocalamus_acutus : AAAC... 9902
Diplometopon_zarudnyi : AAAT... 9923
Amphisbaena_schmidti : AAAC... 9908
Bipes_tridactylus : AAAC... 9908
Bipes_canaliculatus : AA... 9920
Bipes_biporus  : AA... 9962
Anolis_carolinensis : AAAC... 9572
Ophisaurus_atnuatus : AAGG... 9582
Varanus_salvator : AAAC... 9968
Mertensiella_luschani : AA... 9974
Xenopus_laevis : AA... 9965

```

```

*      10660      *      10680      *      10700      *      10720      *      10740      *      10760      *
Bos_taurus      : AATAATAGTAAATGGCCATAAACAACACACCTAGGCTTCCGACACATGCAACCCAGCCGCTTTAAAGAAATGATATATAGCGCCATAAGCGGAAAGGAAAT 10095
Hylobates_lar  : AATGGGACAAATGGCCATAAACAACACACCTAGGCTTCCGACACATGCAACCCAGCCGCTTTAAAGAAATGATATATAGCGCCATAAGCGGAAAGGAAAT 10104
Lemur_catta     : AATAATAGTAAATGGCCATAAACAACACACCTAGGCTTCCGACACATGCAACCCAGCCGCTTTAAAGAAATGATATATAGCGCCATAAGCGGAAAGGAAAT 10101
Nycticebus_coucang : AATAATAGTAAATGGCCATAAACAACACACCTAGGCTTCCGACACATGCAACCCAGCCGCTTTAAAGAAATGATATATAGCGCCATAAGCGGAAAGGAAAT 10104
Tarsius_bancanus : AATAATAGTAAATGGCCATAAACAACACACCTAGGCTTCCGACACATGCAACCCAGCCGCTTTAAAGAAATGATATATAGCGCCATAAGCGGAAAGGAAAT 10098
Gorilla_gorilla : AATAGTAGCAAAATGGCCATAAACAACACACCTAGGCTTCCGACACATGCAACCCAGCCGCTTTAAAGAAATGATATATAGCGCCATAAGCGGAAAGGAAAT 10104
Homo_sapiens   : AATAATAGTAAATGGCCATAAACAACACACCTAGGCTTCCGACACATGCAACCCAGCCGCTTTAAAGAAATGATATATAGCGCCATAAGCGGAAAGGAAAT 10095
Papio_hamadryas : AATAATAGTAAATGGCCATAAACAACACACCTAGGCTTCCGACACATGCAACCCAGCCGCTTTAAAGAAATGATATATAGCGCCATAAGCGGAAAGGAAAT 10104
Cebus_albifrons : AATAATAGTAAATGGCCATAAACAACACACCTAGGCTTCCGACACATGCAACCCAGCCGCTTTAAAGAAATGATATATAGCGCCATAAGCGGAAAGGAAAT 10092
Macaca_sylvanus : AATCATGGTAAATGGCCATAAACAACACACCTAGGCTTCCGACACATGCAACCCAGCCGCTTTAAAGAAATGATATATAGCGCCATAAGCGGAAAGGAAAT 10101
Pongo_pygmaeus : AATAATAGTAAATGGCCATAAACAACACACCTAGGCTTCCGACACATGCAACCCAGCCGCTTTAAAGAAATGATATATAGCGCCATAAGCGGAAAGGAAAT 10104
Pan_paniscus   : AATAATAGTAAATGGCCATAAACAACACACCTAGGCTTCCGACACATGCAACCCAGCCGCTTTAAAGAAATGATATATAGCGCCATAAGCGGAAAGGAAAT 10104
Agkistrodon_piscivorus : AATAATAGTAAATGGCCATAAACAACACACCTAGGCTTCCGACACATGCAACCCAGCCGCTTTAAAGAAATGATATATAGCGCCATAAGCGGAAAGGAAAT 10026
Pantherophis_guttatus : AATAATAGTAAATGGCCATAAACAACACACCTAGGCTTCCGACACATGCAACCCAGCCGCTTTAAAGAAATGATATATAGCGCCATAAGCGGAAAGGAAAT 10005
Dinodon_semicarinatus : AATAATAGTAAATGGCCATAAACAACACACCTAGGCTTCCGACACATGCAACCCAGCCGCTTTAAAGAAATGATATATAGCGCCATAAGCGGAAAGGAAAT 10008
Boa_constrictor : AATAATAGTAAATGGCCATAAACAACACACCTAGGCTTCCGACACATGCAACCCAGCCGCTTTAAAGAAATGATATATAGCGCCATAAGCGGAAAGGAAAT 10056
Python_regius  : AATAATAGTAAATGGCCATAAACAACACACCTAGGCTTCCGACACATGCAACCCAGCCGCTTTAAAGAAATGATATATAGCGCCATAAGCGGAAAGGAAAT 10056
Acrochordus_granulatus : AATAATAGTAAATGGCCATAAACAACACACCTAGGCTTCCGACACATGCAACCCAGCCGCTTTAAAGAAATGATATATAGCGCCATAAGCGGAAAGGAAAT 10038
Cylindrophis_ruffus : AATAATAGTAAATGGCCATAAACAACACACCTAGGCTTCCGACACATGCAACCCAGCCGCTTTAAAGAAATGATATATAGCGCCATAAGCGGAAAGGAAAT 10020
Ovophis_okinavensis : AATAATAGTAAATGGCCATAAACAACACACCTAGGCTTCCGACACATGCAACCCAGCCGCTTTAAAGAAATGATATATAGCGCCATAAGCGGAAAGGAAAT 10023
Xenopeltis_unicolor : AATAATAGTAAATGGCCATAAACAACACACCTAGGCTTCCGACACATGCAACCCAGCCGCTTTAAAGAAATGATATATAGCGCCATAAGCGGAAAGGAAAT 10062
Typhlops_reticulatus : AATAATAGTAAATGGCCATAAACAACACACCTAGGCTTCCGACACATGCAACCCAGCCGCTTTAAAGAAATGATATATAGCGCCATAAGCGGAAAGGAAAT 10002
Leptotyphlops_dulcis : AATAATAGTAAATGGCCATAAACAACACACCTAGGCTTCCGACACATGCAACCCAGCCGCTTTAAAGAAATGATATATAGCGCCATAAGCGGAAAGGAAAT 10012
Caiman_crocodilus : AATAATAGTAAATGGCCATAAACAACACACCTAGGCTTCCGACACATGCAACCCAGCCGCTTTAAAGAAATGATATATAGCGCCATAAGCGGAAAGGAAAT 10119
Alligator_sinensis : AATAATAGTAAATGGCCATAAACAACACACCTAGGCTTCCGACACATGCAACCCAGCCGCTTTAAAGAAATGATATATAGCGCCATAAGCGGAAAGGAAAT 10161
Alligator_mississippiensis : AATAATAGTAAATGGCCATAAACAACACACCTAGGCTTCCGACACATGCAACCCAGCCGCTTTAAAGAAATGATATATAGCGCCATAAGCGGAAAGGAAAT 10101
Gavialis_gangeticus : AATAATAGTAAATGGCCATAAACAACACACCTAGGCTTCCGACACATGCAACCCAGCCGCTTTAAAGAAATGATATATAGCGCCATAAGCGGAAAGGAAAT 10129
Crocodylus_moreletii : AATAATAGTAAATGGCCATAAACAACACACCTAGGCTTCCGACACATGCAACCCAGCCGCTTTAAAGAAATGATATATAGCGCCATAAGCGGAAAGGAAAT 10105
Dogania_subplana : AATAATAGTAAATGGCCATAAACAACACACCTAGGCTTCCGACACATGCAACCCAGCCGCTTTAAAGAAATGATATATAGCGCCATAAGCGGAAAGGAAAT 10044
Pelomedusa_subrufa : AATAATAGTAAATGGCCATAAACAACACACCTAGGCTTCCGACACATGCAACCCAGCCGCTTTAAAGAAATGATATATAGCGCCATAAGCGGAAAGGAAAT 10095
Chrysemys_picta : AATAATAGTAAATGGCCATAAACAACACACCTAGGCTTCCGACACATGCAACCCAGCCGCTTTAAAGAAATGATATATAGCGCCATAAGCGGAAAGGAAAT 10101
Chelonia_mydas : AATAATAGTAAATGGCCATAAACAACACACCTAGGCTTCCGACACATGCAACCCAGCCGCTTTAAAGAAATGATATATAGCGCCATAAGCGGAAAGGAAAT 10113
Tinamus_major : AATAATAGTAAATGGCCATAAACAACACACCTAGGCTTCCGACACATGCAACCCAGCCGCTTTAAAGAAATGATATATAGCGCCATAAGCGGAAAGGAAAT 10086
Smithornis_sharpei : AATAATAGTAAATGGCCATAAACAACACACCTAGGCTTCCGACACATGCAACCCAGCCGCTTTAAAGAAATGATATATAGCGCCATAAGCGGAAAGGAAAT 10092
Corvus_frugilegus : AATAATAGTAAATGGCCATAAACAACACACCTAGGCTTCCGACACATGCAACCCAGCCGCTTTAAAGAAATGATATATAGCGCCATAAGCGGAAAGGAAAT 10101
Vidua_chalybeata : AATAATAGTAAATGGCCATAAACAACACACCTAGGCTTCCGACACATGCAACCCAGCCGCTTTAAAGAAATGATATATAGCGCCATAAGCGGAAAGGAAAT 10101
Buteo_buteo    : AATAATAGTAAATGGCCATAAACAACACACCTAGGCTTCCGACACATGCAACCCAGCCGCTTTAAAGAAATGATATATAGCGCCATAAGCGGAAAGGAAAT 10098
Falco_peregrinus : AATAATAGTAAATGGCCATAAACAACACACCTAGGCTTCCGACACATGCAACCCAGCCGCTTTAAAGAAATGATATATAGCGCCATAAGCGGAAAGGAAAT 10092
Dromaius_novaeollandiae : AATAATAGTAAATGGCCATAAACAACACACCTAGGCTTCCGACACATGCAACCCAGCCGCTTTAAAGAAATGATATATAGCGCCATAAGCGGAAAGGAAAT 10098
Struthio_camelus : AATAATAGTAAATGGCCATAAACAACACACCTAGGCTTCCGACACATGCAACCCAGCCGCTTTAAAGAAATGATATATAGCGCCATAAGCGGAAAGGAAAT 10086
Apteryx_haastii : AATAATAGTAAATGGCCATAAACAACACACCTAGGCTTCCGACACATGCAACCCAGCCGCTTTAAAGAAATGATATATAGCGCCATAAGCGGAAAGGAAAT 10098
Rhea_american : AATAATAGTAAATGGCCATAAACAACACACCTAGGCTTCCGACACATGCAACCCAGCCGCTTTAAAGAAATGATATATAGCGCCATAAGCGGAAAGGAAAT 10095
Gallus_gallus  : AATAATAGTAAATGGCCATAAACAACACACCTAGGCTTCCGACACATGCAACCCAGCCGCTTTAAAGAAATGATATATAGCGCCATAAGCGGAAAGGAAAT 10101
Ciconia_ciconia : AATAATAGTAAATGGCCATAAACAACACACCTAGGCTTCCGACACATGCAACCCAGCCGCTTTAAAGAAATGATATATAGCGCCATAAGCGGAAAGGAAAT 10098
Ciconia_boyciana : AATAATAGTAAATGGCCATAAACAACACACCTAGGCTTCCGACACATGCAACCCAGCCGCTTTAAAGAAATGATATATAGCGCCATAAGCGGAAAGGAAAT 10083
Iguana_iguana  : AATAATAGTAAATGGCCATAAACAACACACCTAGGCTTCCGACACATGCAACCCAGCCGCTTTAAAGAAATGATATATAGCGCCATAAGCGGAAAGGAAAT 10089
Fumeces_egregius : AATAATAGTAAATGGCCATAAACAACACACCTAGGCTTCCGACACATGCAACCCAGCCGCTTTAAAGAAATGATATATAGCGCCATAAGCGGAAAGGAAAT 10077
Sphenodon_punctatus : AATAATAGTAAATGGCCATAAACAACACACCTAGGCTTCCGACACATGCAACCCAGCCGCTTTAAAGAAATGATATATAGCGCCATAAGCGGAAAGGAAAT 10086
Sceloporus_occidentalis : AATAATAGTAAATGGCCATAAACAACACACCTAGGCTTCCGACACATGCAACCCAGCCGCTTTAAAGAAATGATATATAGCGCCATAAGCGGAAAGGAAAT 10095
Cordylus_warreni : AATAATAGTAAATGGCCATAAACAACACACCTAGGCTTCCGACACATGCAACCCAGCCGCTTTAAAGAAATGATATATAGCGCCATAAGCGGAAAGGAAAT 10071
Abronia_graminea : AATAATAGTAAATGGCCATAAACAACACACCTAGGCTTCCGACACATGCAACCCAGCCGCTTTAAAGAAATGATATATAGCGCCATAAGCGGAAAGGAAAT 10110
Shinisaurus_crocodilurus : AATAATAGTAAATGGCCATAAACAACACACCTAGGCTTCCGACACATGCAACCCAGCCGCTTTAAAGAAATGATATATAGCGCCATAAGCGGAAAGGAAAT 10068
Varanus_komodoensis : AATAATAGTAAATGGCCATAAACAACACACCTAGGCTTCCGACACATGCAACCCAGCCGCTTTAAAGAAATGATATATAGCGCCATAAGCGGAAAGGAAAT 10035
Rhineura_floridana : AATAATAGTAAATGGCCATAAACAACACACCTAGGCTTCCGACACATGCAACCCAGCCGCTTTAAAGAAATGATATATAGCGCCATAAGCGGAAAGGAAAT 10056
Geocalamus_acutus : AATAATAGTAAATGGCCATAAACAACACACCTAGGCTTCCGACACATGCAACCCAGCCGCTTTAAAGAAATGATATATAGCGCCATAAGCGGAAAGGAAAT 10041
Diplometopon_zarudnyi : AATAATAGTAAATGGCCATAAACAACACACCTAGGCTTCCGACACATGCAACCCAGCCGCTTTAAAGAAATGATATATAGCGCCATAAGCGGAAAGGAAAT 10041
Amphisbaena_schmidti : AATAATAGTAAATGGCCATAAACAACACACCTAGGCTTCCGACACATGCAACCCAGCCGCTTTAAAGAAATGATATATAGCGCCATAAGCGGAAAGGAAAT 10053
Bipes_tridactylus : AATAATAGTAAATGGCCATAAACAACACACCTAGGCTTCCGACACATGCAACCCAGCCGCTTTAAAGAAATGATATATAGCGCCATAAGCGGAAAGGAAAT 10095
Bipes_canaliculatus : AATAATAGTAAATGGCCATAAACAACACACCTAGGCTTCCGACACATGCAACCCAGCCGCTTTAAAGAAATGATATATAGCGCCATAAGCGGAAAGGAAAT 9705
Bipes_biporus  : AATAATAGTAAATGGCCATAAACAACACACCTAGGCTTCCGACACATGCAACCCAGCCGCTTTAAAGAAATGATATATAGCGCCATAAGCGGAAAGGAAAT 9715
Anolis_carolinensis : AATAATAGTAAATGGCCATAAACAACACACCTAGGCTTCCGACACATGCAACCCAGCCGCTTTAAAGAAATGATATATAGCGCCATAAGCGGAAAGGAAAT 10101
Ophisaurus_atnuatus : AATAATAGTAAATGGCCATAAACAACACACCTAGGCTTCCGACACATGCAACCCAGCCGCTTTAAAGAAATGATATATAGCGCCATAAGCGGAAAGGAAAT 10107
Varanus_salvator : AATAATAGTAAATGGCCATAAACAACACACCTAGGCTTCCGACACATGCAACCCAGCCGCTTTAAAGAAATGATATATAGCGCCATAAGCGGAAAGGAAAT 10107
Mertensiella_luschani : AATAATAGTAAATGGCCATAAACAACACACCTAGGCTTCCGACACATGCAACCCAGCCGCTTTAAAGAAATGATATATAGCGCCATAAGCGGAAAGGAAAT 10095
Xenopus_laevis : AATAATAGTAAATGGCCATAAACAACACACCTAGGCTTCCGACACATGCAACCCAGCCGCTTTAAAGAAATGATATATAGCGCCATAAGCGGAAAGGAAAT 10095

```





```

*      10920      *      10940      *      10960      *      10980      *      11000      *      11020      *      11040
Bos_taurus      : AGCTGATGACCAACGCGGGCCCTGAAATACAAATATGGCCGCTGTAAGAGTAAAGACAGCGGTAATATTTGCGAATATGGNCBAACCCGGATCCCTAACCAGTAATAATAAAGCG : 10361
Hylobates_lar  : ATACTACACCAACGCGGGCCCTGAAATACAAATATGGCCGCTGTAAGAGTAAAGACAGCGGTAATATTTGCGAATATGGNCBAACCCGGATCCCTAACCAGTAATAATAAAGCG : 10370
Lemur_catta     : GGCTGATGACCAACGCGGGCCCTGAAATACAAATATGGCCGCTGTAAGAGTAAAGACAGCGGTAATATTTGCGAATATGGNCBAACCCGGATCCCTAACCAGTAATAATAAAGCG : 10367
Nycticebus_coucang : GGCTGATGACCAACGCGGGCCCTGAAATACAAATATGGCCGCTGTAAGAGTAAAGACAGCGGTAATATTTGCGAATATGGNCBAACCCGGATCCCTAACCAGTAATAATAAAGCG : 10370
Tarsius_bancanus : ATACTACACCAACGCGGGCCCTGAAATACAAATATGGCCGCTGTAAGAGTAAAGACAGCGGTAATATTTGCGAATATGGNCBAACCCGGATCCCTAACCAGTAATAATAAAGCG : 10364
Gorilla_gorilla : ATACTACACCAACGCGGGCCCTGAAATACAAATATGGCCGCTGTAAGAGTAAAGACAGCGGTAATATTTGCGAATATGGNCBAACCCGGATCCCTAACCAGTAATAATAAAGCG : 10370
Homo_sapiens   : ATACTACACCAACGCGGGCCCTGAAATACAAATATGGCCGCTGTAAGAGTAAAGACAGCGGTAATATTTGCGAATATGGNCBAACCCGGATCCCTAACCAGTAATAATAAAGCG : 10361
Papio_hamadryas : GGCTGATGACCAACGCGGGCCCTGAAATACAAATATGGCCGCTGTAAGAGTAAAGACAGCGGTAATATTTGCGAATATGGNCBAACCCGGATCCCTAACCAGTAATAATAAAGCG : 10370
Cebus_albifrons : GGCTGATGACCAACGCGGGCCCTGAAATACAAATATGGCCGCTGTAAGAGTAAAGACAGCGGTAATATTTGCGAATATGGNCBAACCCGGATCCCTAACCAGTAATAATAAAGCG : 10358
Macaca_sylvanus : GGCTGATGACCAACGCGGGCCCTGAAATACAAATATGGCCGCTGTAAGAGTAAAGACAGCGGTAATATTTGCGAATATGGNCBAACCCGGATCCCTAACCAGTAATAATAAAGCG : 10367
Pongo_pygmaeus : ATACTACACCAACGCGGGCCCTGAAATACAAATATGGCCGCTGTAAGAGTAAAGACAGCGGTAATATTTGCGAATATGGNCBAACCCGGATCCCTAACCAGTAATAATAAAGCG : 10370
Pan_paniscus   : ATACTACACCAACGCGGGCCCTGAAATACAAATATGGCCGCTGTAAGAGTAAAGACAGCGGTAATATTTGCGAATATGGNCBAACCCGGATCCCTAACCAGTAATAATAAAGCG : 10370
Agkistrodon_piscivorus : ATACTACACCAACGCGGGCCCTGAAATACAAATATGGCCGCTGTAAGAGTAAAGACAGCGGTAATATTTGCGAATATGGNCBAACCCGGATCCCTAACCAGTAATAATAAAGCG : 10286
Pantherophis_guttatus : ATACTACACCAACGCGGGCCCTGAAATACAAATATGGCCGCTGTAAGAGTAAAGACAGCGGTAATATTTGCGAATATGGNCBAACCCGGATCCCTAACCAGTAATAATAAAGCG : 10265
Dinodon_semicarinatus : ATACTACACCAACGCGGGCCCTGAAATACAAATATGGCCGCTGTAAGAGTAAAGACAGCGGTAATATTTGCGAATATGGNCBAACCCGGATCCCTAACCAGTAATAATAAAGCG : 10268
Boa_constrictor : ATACTACACCAACGCGGGCCCTGAAATACAAATATGGCCGCTGTAAGAGTAAAGACAGCGGTAATATTTGCGAATATGGNCBAACCCGGATCCCTAACCAGTAATAATAAAGCG : 10316
Python_regius  : ATACTACACCAACGCGGGCCCTGAAATACAAATATGGCCGCTGTAAGAGTAAAGACAGCGGTAATATTTGCGAATATGGNCBAACCCGGATCCCTAACCAGTAATAATAAAGCG : 10316
Acrochordus_granulatus : ATACTACACCAACGCGGGCCCTGAAATACAAATATGGCCGCTGTAAGAGTAAAGACAGCGGTAATATTTGCGAATATGGNCBAACCCGGATCCCTAACCAGTAATAATAAAGCG : 10298
Cylindrophis_ruffus : ATACTACACCAACGCGGGCCCTGAAATACAAATATGGCCGCTGTAAGAGTAAAGACAGCGGTAATATTTGCGAATATGGNCBAACCCGGATCCCTAACCAGTAATAATAAAGCG : 10280
Ovophis_okinavensis : ATACTACACCAACGCGGGCCCTGAAATACAAATATGGCCGCTGTAAGAGTAAAGACAGCGGTAATATTTGCGAATATGGNCBAACCCGGATCCCTAACCAGTAATAATAAAGCG : 10283
Xenopeltis_unicolor : ATACTACACCAACGCGGGCCCTGAAATACAAATATGGCCGCTGTAAGAGTAAAGACAGCGGTAATATTTGCGAATATGGNCBAACCCGGATCCCTAACCAGTAATAATAAAGCG : 10322
Typhlops_reticulatus : ATACTACACCAACGCGGGCCCTGAAATACAAATATGGCCGCTGTAAGAGTAAAGACAGCGGTAATATTTGCGAATATGGNCBAACCCGGATCCCTAACCAGTAATAATAAAGCG : 10262
Leptotyphlops_dulcis : ATACTACACCAACGCGGGCCCTGAAATACAAATATGGCCGCTGTAAGAGTAAAGACAGCGGTAATATTTGCGAATATGGNCBAACCCGGATCCCTAACCAGTAATAATAAAGCG : 10275
Caiman_crocodilus : ATACTACACCAACGCGGGCCCTGAAATACAAATATGGCCGCTGTAAGAGTAAAGACAGCGGTAATATTTGCGAATATGGNCBAACCCGGATCCCTAACCAGTAATAATAAAGCG : 10385
Alligator_sinensis : ATACTACACCAACGCGGGCCCTGAAATACAAATATGGCCGCTGTAAGAGTAAAGACAGCGGTAATATTTGCGAATATGGNCBAACCCGGATCCCTAACCAGTAATAATAAAGCG : 10427
Alligator_mississippiensis : ATACTACACCAACGCGGGCCCTGAAATACAAATATGGCCGCTGTAAGAGTAAAGACAGCGGTAATATTTGCGAATATGGNCBAACCCGGATCCCTAACCAGTAATAATAAAGCG : 10367
Gavialis_gangeticus : ATACTACACCAACGCGGGCCCTGAAATACAAATATGGCCGCTGTAAGAGTAAAGACAGCGGTAATATTTGCGAATATGGNCBAACCCGGATCCCTAACCAGTAATAATAAAGCG : 10395
Crocodylus_moreletii : ATACTACACCAACGCGGGCCCTGAAATACAAATATGGCCGCTGTAAGAGTAAAGACAGCGGTAATATTTGCGAATATGGNCBAACCCGGATCCCTAACCAGTAATAATAAAGCG : 10371
Dogania_subplana : ATACTACACCAACGCGGGCCCTGAAATACAAATATGGCCGCTGTAAGAGTAAAGACAGCGGTAATATTTGCGAATATGGNCBAACCCGGATCCCTAACCAGTAATAATAAAGCG : 10310
Pelomedusa_subrufa : ATACTACACCAACGCGGGCCCTGAAATACAAATATGGCCGCTGTAAGAGTAAAGACAGCGGTAATATTTGCGAATATGGNCBAACCCGGATCCCTAACCAGTAATAATAAAGCG : 10358
Chrysemys_picta : ATACTACACCAACGCGGGCCCTGAAATACAAATATGGCCGCTGTAAGAGTAAAGACAGCGGTAATATTTGCGAATATGGNCBAACCCGGATCCCTAACCAGTAATAATAAAGCG : 10367
Chelonia_mydas : ATACTACACCAACGCGGGCCCTGAAATACAAATATGGCCGCTGTAAGAGTAAAGACAGCGGTAATATTTGCGAATATGGNCBAACCCGGATCCCTAACCAGTAATAATAAAGCG : 10379
Tinamus_major : ATACTACACCAACGCGGGCCCTGAAATACAAATATGGCCGCTGTAAGAGTAAAGACAGCGGTAATATTTGCGAATATGGNCBAACCCGGATCCCTAACCAGTAATAATAAAGCG : 10352
Smithornis_sharpei : ATACTACACCAACGCGGGCCCTGAAATACAAATATGGCCGCTGTAAGAGTAAAGACAGCGGTAATATTTGCGAATATGGNCBAACCCGGATCCCTAACCAGTAATAATAAAGCG : 10358
Corvus_frugilegus : ATACTACACCAACGCGGGCCCTGAAATACAAATATGGCCGCTGTAAGAGTAAAGACAGCGGTAATATTTGCGAATATGGNCBAACCCGGATCCCTAACCAGTAATAATAAAGCG : 10367
Vidua_chalybeata : ATACTACACCAACGCGGGCCCTGAAATACAAATATGGCCGCTGTAAGAGTAAAGACAGCGGTAATATTTGCGAATATGGNCBAACCCGGATCCCTAACCAGTAATAATAAAGCG : 10367
Buteo_buteo    : ATACTACACCAACGCGGGCCCTGAAATACAAATATGGCCGCTGTAAGAGTAAAGACAGCGGTAATATTTGCGAATATGGNCBAACCCGGATCCCTAACCAGTAATAATAAAGCG : 10364
Falco_peregrinus : ATACTACACCAACGCGGGCCCTGAAATACAAATATGGCCGCTGTAAGAGTAAAGACAGCGGTAATATTTGCGAATATGGNCBAACCCGGATCCCTAACCAGTAATAATAAAGCG : 10358
Dromaius_novaeollandiae : ATACTACACCAACGCGGGCCCTGAAATACAAATATGGCCGCTGTAAGAGTAAAGACAGCGGTAATATTTGCGAATATGGNCBAACCCGGATCCCTAACCAGTAATAATAAAGCG : 10364
Struthio_camelus : ATACTACACCAACGCGGGCCCTGAAATACAAATATGGCCGCTGTAAGAGTAAAGACAGCGGTAATATTTGCGAATATGGNCBAACCCGGATCCCTAACCAGTAATAATAAAGCG : 10352
Apteryx_haastii : ATACTACACCAACGCGGGCCCTGAAATACAAATATGGCCGCTGTAAGAGTAAAGACAGCGGTAATATTTGCGAATATGGNCBAACCCGGATCCCTAACCAGTAATAATAAAGCG : 10364
Rhea_american : ATACTACACCAACGCGGGCCCTGAAATACAAATATGGCCGCTGTAAGAGTAAAGACAGCGGTAATATTTGCGAATATGGNCBAACCCGGATCCCTAACCAGTAATAATAAAGCG : 10361
Gallus_gallus  : ATACTACACCAACGCGGGCCCTGAAATACAAATATGGCCGCTGTAAGAGTAAAGACAGCGGTAATATTTGCGAATATGGNCBAACCCGGATCCCTAACCAGTAATAATAAAGCG : 10367
Ciconia_ciconia : ATACTACACCAACGCGGGCCCTGAAATACAAATATGGCCGCTGTAAGAGTAAAGACAGCGGTAATATTTGCGAATATGGNCBAACCCGGATCCCTAACCAGTAATAATAAAGCG : 10364
Ciconia_boyciana : ATACTACACCAACGCGGGCCCTGAAATACAAATATGGCCGCTGTAAGAGTAAAGACAGCGGTAATATTTGCGAATATGGNCBAACCCGGATCCCTAACCAGTAATAATAAAGCG : 10349
Iguana_iguana  : ATACTACACCAACGCGGGCCCTGAAATACAAATATGGCCGCTGTAAGAGTAAAGACAGCGGTAATATTTGCGAATATGGNCBAACCCGGATCCCTAACCAGTAATAATAAAGCG : 10355
Eumeces_egregius : ATACTACACCAACGCGGGCCCTGAAATACAAATATGGCCGCTGTAAGAGTAAAGACAGCGGTAATATTTGCGAATATGGNCBAACCCGGATCCCTAACCAGTAATAATAAAGCG : 10355
Sphenodon_punctatus : ATACTACACCAACGCGGGCCCTGAAATACAAATATGGCCGCTGTAAGAGTAAAGACAGCGGTAATATTTGCGAATATGGNCBAACCCGGATCCCTAACCAGTAATAATAAAGCG : 10343
Sceloporus_occidentalis : ATACTACACCAACGCGGGCCCTGAAATACAAATATGGCCGCTGTAAGAGTAAAGACAGCGGTAATATTTGCGAATATGGNCBAACCCGGATCCCTAACCAGTAATAATAAAGCG : 10352
Cordylus_warreni : ATACTACACCAACGCGGGCCCTGAAATACAAATATGGCCGCTGTAAGAGTAAAGACAGCGGTAATATTTGCGAATATGGNCBAACCCGGATCCCTAACCAGTAATAATAAAGCG : 10361
Abronia_graminea : ATACTACACCAACGCGGGCCCTGAAATACAAATATGGCCGCTGTAAGAGTAAAGACAGCGGTAATATTTGCGAATATGGNCBAACCCGGATCCCTAACCAGTAATAATAAAGCG : 10337
Shinisaurus_crocodilurus : ATACTACACCAACGCGGGCCCTGAAATACAAATATGGCCGCTGTAAGAGTAAAGACAGCGGTAATATTTGCGAATATGGNCBAACCCGGATCCCTAACCAGTAATAATAAAGCG : 10376
Varanus_komodoensis : ATACTACACCAACGCGGGCCCTGAAATACAAATATGGCCGCTGTAAGAGTAAAGACAGCGGTAATATTTGCGAATATGGNCBAACCCGGATCCCTAACCAGTAATAATAAAGCG : 10334
Rhineura_floridana : ATACTACACCAACGCGGGCCCTGAAATACAAATATGGCCGCTGTAAGAGTAAAGACAGCGGTAATATTTGCGAATATGGNCBAACCCGGATCCCTAACCAGTAATAATAAAGCG : 10301
Geocalamus_acutus : ATACTACACCAACGCGGGCCCTGAAATACAAATATGGCCGCTGTAAGAGTAAAGACAGCGGTAATATTTGCGAATATGGNCBAACCCGGATCCCTAACCAGTAATAATAAAGCG : 10322
Diplometopon_zarudnyi : ATACTACACCAACGCGGGCCCTGAAATACAAATATGGCCGCTGTAAGAGTAAAGACAGCGGTAATATTTGCGAATATGGNCBAACCCGGATCCCTAACCAGTAATAATAAAGCG : 10307
Amphisbaena_schmidti : ATACTACACCAACGCGGGCCCTGAAATACAAATATGGCCGCTGTAAGAGTAAAGACAGCGGTAATATTTGCGAATATGGNCBAACCCGGATCCCTAACCAGTAATAATAAAGCG : 10307
Bipes_tridactylus : ATACTACACCAACGCGGGCCCTGAAATACAAATATGGCCGCTGTAAGAGTAAAGACAGCGGTAATATTTGCGAATATGGNCBAACCCGGATCCCTAACCAGTAATAATAAAGCG : 10319
Bipes_canaliculatus : ATACTACACCAACGCGGGCCCTGAAATACAAATATGGCCGCTGTAAGAGTAAAGACAGCGGTAATATTTGCGAATATGGNCBAACCCGGATCCCTAACCAGTAATAATAAAGCG : 10361
Bipes_biporus  : ATACTACACCAACGCGGGCCCTGAAATACAAATATGGCCGCTGTAAGAGTAAAGACAGCGGTAATATTTGCGAATATGGNCBAACCCGGATCCCTAACCAGTAATAATAAAGCG : 9971
Anolis_carolinensis : ATACTACACCAACGCGGGCCCTGAAATACAAATATGGCCGCTGTAAGAGTAAAGACAGCGGTAATATTTGCGAATATGGNCBAACCCGGATCCCTAACCAGTAATAATAAAGCG : 9981
Ophisaurus_atnuatus : ATACTACACCAACGCGGGCCCTGAAATACAAATATGGCCGCTGTAAGAGTAAAGACAGCGGTAATATTTGCGAATATGGNCBAACCCGGATCCCTAACCAGTAATAATAAAGCG : 10367
Varanus_salvator : ATACTACACCAACGCGGGCCCTGAAATACAAATATGGCCGCTGTAAGAGTAAAGACAGCGGTAATATTTGCGAATATGGNCBAACCCGGATCCCTAACCAGTAATAATAAAGCG : 10373
Mertensiella_luschani : ATACTACACCAACGCGGGCCCTGAAATACAAATATGGCCGCTGTAAGAGTAAAGACAGCGGTAATATTTGCGAATATGGNCBAACCCGGATCCCTAACCAGTAATAATAAAGCG : 10373
Xenopus_laevis : ATACTACACCAACGCGGGCCCTGAAATACAAATATGGCCGCTGTAAGAGTAAAGACAGCGGTAATATTTGCGAATATGGNCBAACCCGGATCCCTAACCAGTAATAATAAAGCG : 10361

```



|                            |   |        |       |        |        |        |         |         |       |        |       |       |       |       |         |
|----------------------------|---|--------|-------|--------|--------|--------|---------|---------|-------|--------|-------|-------|-------|-------|---------|
|                            |   | 11180  | *     | 11200  | *      | 11220  | *       | 11240   | *     | 11260  | *     | 11280 | *     | 11300 |         |
| Bos_taurus                 | : | ACNGCC | TAAT  | GTACNA | CCAGGC | TAATAG | CCAGGAA | AGAAATA | AAAC  | TAATAA | CAAC  | TACCC | CC    | ----- | : 10578 |
| Hylobates_lar              | : | ACNGCC | TAAT  | GTACNA | CCAGGC | TAATAG | CCAGGAA | AGAAATA | AAAC  | TAATAA | CAAC  | TACCC | CC    | ----- | : 10587 |
| Lemur_catta                | : | ACNGCC | TAAT  | GTACNA | CCAGGC | TAATAG | CCAGGAA | AGAAATA | AAAC  | TAATAA | CAAC  | TACCC | CC    | ----- | : 10584 |
| Nycticebus_coucang         | : | ACNGCC | TAAT  | GTACNA | CCAGGC | TAATAG | CCAGGAA | AGAAATA | AAAC  | TAATAA | CAAC  | TACCC | CC    | ----- | : 10587 |
| Tarsius_bancanus           | : | ACNGCC | TAAT  | GTACNA | CCAGGC | TAATAG | CCAGGAA | AGAAATA | AAAC  | TAATAA | CAAC  | TACCC | CC    | ----- | : 10581 |
| Gorilla_gorilla            | : | ACNGCC | TAAT  | GTACNA | CCAGGC | TAATAG | CCAGGAA | AGAAATA | AAAC  | TAATAA | CAAC  | TACCC | CC    | ----- | : 10587 |
| Homo_sapiens               | : | ACNGCC | TAAT  | GTACNA | CCAGGC | TAATAG | CCAGGAA | AGAAATA | AAAC  | TAATAA | CAAC  | TACCC | CC    | ----- | : 10578 |
| Papio_hamadryas            | : | ACNGCC | TAAT  | GTACNA | CCAGGC | TAATAG | CCAGGAA | AGAAATA | AAAC  | TAATAA | CAAC  | TACCC | CC    | ----- | : 10587 |
| Cebus_albifrons            | : | ACNGCC | TAAT  | GTACNA | CCAGGC | TAATAG | CCAGGAA | AGAAATA | AAAC  | TAATAA | CAAC  | TACCC | CC    | ----- | : 10575 |
| Macaca_sylvanus            | : | ACNGCC | TAAT  | GTACNA | CCAGGC | TAATAG | CCAGGAA | AGAAATA | AAAC  | TAATAA | CAAC  | TACCC | CC    | ----- | : 10584 |
| Pongo_pygmaeus             | : | ACNGCC | TAAT  | GTACNA | CCAGGC | TAATAG | CCAGGAA | AGAAATA | AAAC  | TAATAA | CAAC  | TACCC | CC    | ----- | : 10587 |
| Pan_paniscus               | : | ACNGCC | TAAT  | GTACNA | CCAGGC | TAATAG | CCAGGAA | AGAAATA | AAAC  | TAATAA | CAAC  | TACCC | CC    | ----- | : 10587 |
| Agkistrodon_piscivorus     | : | ATAGCA | TAAT  | GTACNA | CCAGGC | TAATAG | CCAGGAA | AGAAATA | AAAC  | TAATAA | CAAC  | TACCC | CC    | ----- | : 10500 |
| Pantherophis_guttatus      | : | ATAGCA | TAAT  | GTACNA | CCAGGC | TAATAG | CCAGGAA | AGAAATA | AAAC  | TAATAA | CAAC  | TACCC | CC    | ----- | : 10479 |
| Dinodon_semicarinatus      | : | ATAGCA | TAAT  | GTACNA | CCAGGC | TAATAG | CCAGGAA | AGAAATA | AAAC  | TAATAA | CAAC  | TACCC | CC    | ----- | : 10482 |
| Boa_constrictor            | : | GGTGC  | TAAT  | GTACNA | CCAGGC | TAATAG | CCAGGAA | AGAAATA | AAAC  | TAATAA | CAAC  | TACCC | CC    | ----- | : 10530 |
| Python_regius              | : | TCAGCA | TAAT  | GTACNA | CCAGGC | TAATAG | CCAGGAA | AGAAATA | AAAC  | TAATAA | CAAC  | TACCC | CC    | ----- | : 10530 |
| Acrochordus_granulatus     | : | ACCA   | TAAT  | GTACNA | CCAGGC | TAATAG | CCAGGAA | AGAAATA | AAAC  | TAATAA | CAAC  | TACCC | CC    | ----- | : 10512 |
| Cylindrophis_ruffus        | : | AGGC   | TAAT  | GTACNA | CCAGGC | TAATAG | CCAGGAA | AGAAATA | AAAC  | TAATAA | CAAC  | TACCC | CC    | ----- | : 10494 |
| Ovophis_okinavensis        | : | AGGC   | TAAT  | GTACNA | CCAGGC | TAATAG | CCAGGAA | AGAAATA | AAAC  | TAATAA | CAAC  | TACCC | CC    | ----- | : 10497 |
| Xenopeltis_unicolor        | : | AGGC   | TAAT  | GTACNA | CCAGGC | TAATAG | CCAGGAA | AGAAATA | AAAC  | TAATAA | CAAC  | TACCC | CC    | ----- | : 10536 |
| Typhlops_reticulatus       | : | CTGG   | TAAT  | GTACNA | CCAGGC | TAATAG | CCAGGAA | AGAAATA | AAAC  | TAATAA | CAAC  | TACCC | CC    | ----- | : 10480 |
| Leptotyphlops_dulcis       | : | CGCG   | TAAT  | GTACNA | CCAGGC | TAATAG | CCAGGAA | AGAAATA | AAAC  | TAATAA | CAAC  | TACCC | CC    | ----- | : 10486 |
| Caiman_crocodilus          | : | ACNGCC | TAAT  | GTACNA | CCAGGC | TAATAG | CCAGGAA | AGAAATA | AAAC  | TAATAA | CAAC  | TACCC | CC    | ----- | : 10599 |
| Alligator_sinensis         | : | CGCG   | TAAT  | GTACNA | CCAGGC | TAATAG | CCAGGAA | AGAAATA | AAAC  | TAATAA | CAAC  | TACCC | CC    | ----- | : 10641 |
| Alligator_mississippiensis | : | CGCG   | TAAT  | GTACNA | CCAGGC | TAATAG | CCAGGAA | AGAAATA | AAAC  | TAATAA | CAAC  | TACCC | CC    | ----- | : 10581 |
| Gavialis_gangeticus        | : | CGCG   | TAAT  | GTACNA | CCAGGC | TAATAG | CCAGGAA | AGAAATA | AAAC  | TAATAA | CAAC  | TACCC | CC    | ----- | : 10609 |
| Crocodylus_moreletii       | : | CGCG   | TAAT  | GTACNA | CCAGGC | TAATAG | CCAGGAA | AGAAATA | AAAC  | TAATAA | CAAC  | TACCC | CC    | ----- | : 10585 |
| Dogania_subplana           | : | CGCG   | TAAT  | GTACNA | CCAGGC | TAATAG | CCAGGAA | AGAAATA | AAAC  | TAATAA | CAAC  | TACCC | CC    | ----- | : 10527 |
| Pelomedusa_subrufa         | : | CGCG   | TAAT  | GTACNA | CCAGGC | TAATAG | CCAGGAA | AGAAATA | AAAC  | TAATAA | CAAC  | TACCC | CC    | ----- | : 10575 |
| Chrysemys_picta            | : | CGCG   | TAAT  | GTACNA | CCAGGC | TAATAG | CCAGGAA | AGAAATA | AAAC  | TAATAA | CAAC  | TACCC | CC    | ----- | : 10587 |
| Chelonia_mydas             | : | CGCG   | TAAT  | GTACNA | CCAGGC | TAATAG | CCAGGAA | AGAAATA | AAAC  | TAATAA | CAAC  | TACCC | CC    | ----- | : 10599 |
| Tinamus_major              | : | CGCG   | TAAT  | GTACNA | CCAGGC | TAATAG | CCAGGAA | AGAAATA | AAAC  | TAATAA | CAAC  | TACCC | CC    | ----- | : 10575 |
| Smithornis_sharpei         | : | ACCG   | TAAT  | GTACNA | CCAGGC | TAATAG | CCAGGAA | AGAAATA | AAAC  | TAATAA | CAAC  | TACCC | CC    | ----- | : 10581 |
| Corvus_frugilegus          | : | ACNG   | TAAT  | GTACNA | CCAGGC | TAATAG | CCAGGAA | AGAAATA | AAAC  | TAATAA | CAAC  | TACCC | CC    | ----- | : 10593 |
| Vidua_chalybeata           | : | ACNG   | TAAT  | GTACNA | CCAGGC | TAATAG | CCAGGAA | AGAAATA | AAAC  | TAATAA | CAAC  | TACCC | CC    | ----- | : 10590 |
| Buteo_buteo                | : | CGCG   | TAAT  | GTACNA | CCAGGC | TAATAG | CCAGGAA | AGAAATA | AAAC  | TAATAA | CAAC  | TACCC | CC    | ----- | : 10590 |
| Falco_peregrinus           | : | CGCG   | TAAT  | GTACNA | CCAGGC | TAATAG | CCAGGAA | AGAAATA | AAAC  | TAATAA | CAAC  | TACCC | CC    | ----- | : 10587 |
| Dromaius_novaeollandiae    | : | CGCG   | TAAT  | GTACNA | CCAGGC | TAATAG | CCAGGAA | AGAAATA | AAAC  | TAATAA | CAAC  | TACCC | CC    | ----- | : 10581 |
| Struthio_camelus           | : | CGCG   | TAAT  | GTACNA | CCAGGC | TAATAG | CCAGGAA | AGAAATA | AAAC  | TAATAA | CAAC  | TACCC | CC    | ----- | : 10587 |
| Apteryx_haastii            | : | CGCG   | TAAT  | GTACNA | CCAGGC | TAATAG | CCAGGAA | AGAAATA | AAAC  | TAATAA | CAAC  | TACCC | CC    | ----- | : 10575 |
| Rhea_american              | : | CGCG   | TAAT  | GTACNA | CCAGGC | TAATAG | CCAGGAA | AGAAATA | AAAC  | TAATAA | CAAC  | TACCC | CC    | ----- | : 10587 |
| Gallus_gallus              | : | CGCG   | TAAT  | GTACNA | CCAGGC | TAATAG | CCAGGAA | AGAAATA | AAAC  | TAATAA | CAAC  | TACCC | CC    | ----- | : 10584 |
| Ciconia_ciconia            | : | CGCG   | TAAT  | GTACNA | CCAGGC | TAATAG | CCAGGAA | AGAAATA | AAAC  | TAATAA | CAAC  | TACCC | CC    | ----- | : 10590 |
| Ciconia_boycinana          | : | CGCG   | TAAT  | GTACNA | CCAGGC | TAATAG | CCAGGAA | AGAAATA | AAAC  | TAATAA | CAAC  | TACCC | CC    | ----- | : 10587 |
| Iguana_iguana              | : | CGCG   | TAAT  | GTACNA | CCAGGC | TAATAG | CCAGGAA | AGAAATA | AAAC  | TAATAA | CAAC  | TACCC | CC    | ----- | : 10566 |
| Eumeces_egregius           | : | TCGG   | TAAT  | GTACNA | CCAGGC | TAATAG | CCAGGAA | AGAAATA | AAAC  | TAATAA | CAAC  | TACCC | CC    | ----- | : 10572 |
| Sphenodon_punctatus        | : | -----  | ----- | -----  | -----  | -----  | -----   | -----   | ----- | -----  | ----- | ----- | ----- | ----- | : -     |
| Sceloporus_occidentalis    | : | ATNG   | TAAT  | GTACNA | CCAGGC | TAATAG | CCAGGAA | AGAAATA | AAAC  | TAATAA | CAAC  | TACCC | CC    | ----- | : 10560 |
| Cordylus_warreni           | : | TCGG   | TAAT  | GTACNA | CCAGGC | TAATAG | CCAGGAA | AGAAATA | AAAC  | TAATAA | CAAC  | TACCC | CC    | ----- | : 10569 |
| Abronia_graminea           | : | ATNG   | TAAT  | GTACNA | CCAGGC | TAATAG | CCAGGAA | AGAAATA | AAAC  | TAATAA | CAAC  | TACCC | CC    | ----- | : 10578 |
| Shinisaurus_crocodilurus   | : | CGCG   | TAAT  | GTACNA | CCAGGC | TAATAG | CCAGGAA | AGAAATA | AAAC  | TAATAA | CAAC  | TACCC | CC    | ----- | : 10554 |
| Varanus_komodoensis        | : | TCGG   | TAAT  | GTACNA | CCAGGC | TAATAG | CCAGGAA | AGAAATA | AAAC  | TAATAA | CAAC  | TACCC | CC    | ----- | : 10596 |
| Rhineura_floridana         | : | CTNG   | TAAT  | GTACNA | CCAGGC | TAATAG | CCAGGAA | AGAAATA | AAAC  | TAATAA | CAAC  | TACCC | CC    | ----- | : 10551 |
| Geocalamus_acutus          | : | CTNG   | TAAT  | GTACNA | CCAGGC | TAATAG | CCAGGAA | AGAAATA | AAAC  | TAATAA | CAAC  | TACCC | CC    | ----- | : 10521 |
| Diplometopon_zarudnyi      | : | CTGG   | TAAT  | GTACNA | CCAGGC | TAATAG | CCAGGAA | AGAAATA | AAAC  | TAATAA | CAAC  | TACCC | CC    | ----- | : 10539 |
| Amphisbaena_schmidti       | : | CTGG   | TAAT  | GTACNA | CCAGGC | TAATAG | CCAGGAA | AGAAATA | AAAC  | TAATAA | CAAC  | TACCC | CC    | ----- | : 10524 |
| Bipes_tridactylus          | : | TCAG   | TAAT  | GTACNA | CCAGGC | TAATAG | CCAGGAA | AGAAATA | AAAC  | TAATAA | CAAC  | TACCC | CC    | ----- | : 10524 |
| Bipes_canaliculatus        | : | ACNG   | TAAT  | GTACNA | CCAGGC | TAATAG | CCAGGAA | AGAAATA | AAAC  | TAATAA | CAAC  | TACCC | CC    | ----- | : 10536 |
| Bipes_biporus              | : | ACNG   | TAAT  | GTACNA | CCAGGC | TAATAG | CCAGGAA | AGAAATA | AAAC  | TAATAA | CAAC  | TACCC | CC    | ----- | : 10578 |
| Anolis_carolinensis        | : | TCAG   | TAAT  | GTACNA | CCAGGC | TAATAG | CCAGGAA | AGAAATA | AAAC  | TAATAA | CAAC  | TACCC | CC    | ----- | : 10188 |
| Ophisaurus_atnuatus        | : | CGCG   | TAAT  | GTACNA | CCAGGC | TAATAG | CCAGGAA | AGAAATA | AAAC  | TAATAA | CAAC  | TACCC | CC    | ----- | : 10198 |
| Varanus_salvator           | : | TCNG   | TAAT  | GTACNA | CCAGGC | TAATAG | CCAGGAA | AGAAATA | AAAC  | TAATAA | CAAC  | TACCC | CC    | ----- | : 10584 |
| Mertensiella_luschani      | : | TCNG   | TAAT  | GTACNA | CCAGGC | TAATAG | CCAGGAA | AGAAATA | AAAC  | TAATAA | CAAC  | TACCC | CC    | ----- | : 10581 |
| Xenopus_laevis             | : | CGCG   | TAAT  | GTACNA | CCAGGC | TAATAG | CCAGGAA | AGAAATA | AAAC  | TAATAA | CAAC  | TACCC | CC    | ----- | : 10581 |

```

*      11320      *      11340      *      11360      *      11380      *      11400      *      11420      *      114
Bos_taurus : -----AAGCCCTCAAGTCAAACTGGAGGGATTCACCCCAAAATACATAGCGGAGCGCTCAGCAAAAATATATANAAGCCAAAATCGCAAGCCCTCTAGCACTAACTGACAGCAAGC : 10706
Hylobates_lar : -----GACAATTCATTTCCAACTATGGGATCTACCCCAACCCACCCCGCCCTCCCTACCGAAGCTTACCAATAGGCCAAAACCGCCATCACTCTAGAGCAAGCCGACAGCAAA : 10715
Lemur_catta : -----GACATTCACAAATTTCAAACTCTAGGGTTTACCCCAATACCAACCCCGCCCTAAACCCCTACATAAAGCTCAAGCAAGCCAAAATACAGGCATCACTCTAGCACTAACTGGATAGCAAA : 10712
Nycticebus_coucang : -----GCTCAACCACTTTCCCAACTCTGGGTTTCCCAAAATCAAAACCCCGCTCAAGCTAAATATCTAAAGCTCAAGCAAGCCAAAATACAGGCATCACTCTAGCACTAACTGGATAGCAAA : 10715
Tarsius_bancanus : -----GAGCCCTCCATTTCCCAACTATGGGTTTCCCGCAAGCTGATACCGCCCTCAAGCAAAATATAATANAAGCCAAAACAGGATCCGCTCTAGCACTAACTGGATAGCAAA : 10709
Gorilla_gorilla : -----GACATTTACCTCCCAAACTATGGGTTTACCCCAAAATACATAGCGGCAATACATAGCGGCTCTCAAGAGCCAAAATCAAGCCCTCTAGCACTAACTGGATAGCAAA : 10715
Homo_sapiens : -----TGACATTTATTTCCCAACTATGGGATCTACCCCAACCCACCCCGCCCTCCCTACCGAAGCTTACCAATAGGCCAAAACCGCCCTCTAGCACTAACTGGATAGCAAA : 10706
Papio_hamadryas : -----CAAACTTCAAAATTTCCCAACTATGGGTTTCCCGCAAGCTGATACCGCCCTCAAGCAAAATATAATANAAGCCAAAATACAGGCATCACTCTAGCACTAACTGGATAGCAAA : 10715
Cebus_albifrons : -----AAAAATACAACTTTCCCAACTATGGGTTTCCCGCAAGCTGATACCGCCCTCAAGCCCAATTAAGCCCAATCAAGCCAAAATACAGGCATCACTCTAGCACTAACTGGATAGCAAA : 10703
Macaca_sylvanus : -----CAAACTTCAAAATTTCCCAACTATGGGTTTCCCGCAAGCTGATACCGCCCTCAAGCAAAATATAATANAAGCCAAAATACAGGCATCACTCTAGCACTAACTGGATAGCAAA : 10712
Pongo_pygmaeus : -----CCCGCATTTACCTTTCCCAACTATGGGTTTCCCGCAAGCTGATACCGCCCTCAAGCAAAATATAATANAAGCCAAAATACAGGCATCACTCTAGCACTAACTGGATAGCAAA : 10715
Pan_paniscus : -----TAATCAATTTACCTTTCCCAACTATGGGTTTCCCGCAAGCTGATACCGCCCTCAAGCAAAATATAATANAAGCCAAAATACAGGCATCACTCTAGCACTAACTGGATAGCAAA : 10715
Agkistrodon_piscivorus : -----AGCATCAACCTCTTTCCCAAACTATGGGTTTCCCGCAAGCTGATACCGCCCTCAAGCAAAATATAATANAAGCCAAAATACAGGCATCACTCTAGCACTAACTGGATAGCAAA : 10625
Pantherophis_guttatus : -----AAACAAAACCTGTTTCCCAAACTATGGGTTTCCCGCAAGCTGATACCGCCCTCAAGCAAAATATAATANAAGCCAAAATACAGGCATCACTCTAGCACTAACTGGATAGCAAA : 10604
Dinodon_semicarinatus : -----AAACAAAATATATTTCCCAAACTATGGGTTTCCCGCAAGCTGATACCGCCCTCAAGCAAAATATAATANAAGCCAAAATACAGGCATCACTCTAGCACTAACTGGATAGCAAA : 10607
Boa_constrictor : -----AAATCAACCTTATTTCCCAAACTATGGGTTTCCCGCAAGCTGATACCGCCCTCAAGCAAAATATAATANAAGCCAAAATACAGGCATCACTCTAGCACTAACTGGATAGCAAA : 10655
Python_regius : -----ACCTCAACCTTATTTCCCAAACTATGGGTTTCCCGCAAGCTGATACCGCCCTCAAGCAAAATATAATANAAGCCAAAATACAGGCATCACTCTAGCACTAACTGGATAGCAAA : 10655
Acrochordus_granulatus : -----ACCTCAACCTTATTTCCCAAACTATGGGTTTCCCGCAAGCTGATACCGCCCTCAAGCAAAATATAATANAAGCCAAAATACAGGCATCACTCTAGCACTAACTGGATAGCAAA : 10637
Cylindrophis_ruffus : -----ACCTCAACCTTATTTCCCAAACTATGGGTTTCCCGCAAGCTGATACCGCCCTCAAGCAAAATATAATANAAGCCAAAATACAGGCATCACTCTAGCACTAACTGGATAGCAAA : 10619
Ovophis_okinavensis : -----ACCTCAACCTTATTTCCCAAACTATGGGTTTCCCGCAAGCTGATACCGCCCTCAAGCAAAATATAATANAAGCCAAAATACAGGCATCACTCTAGCACTAACTGGATAGCAAA : 10622
Xenopeltis_unicolor : -----ACCTCAACCTTATTTCCCAAACTATGGGTTTCCCGCAAGCTGATACCGCCCTCAAGCAAAATATAATANAAGCCAAAATACAGGCATCACTCTAGCACTAACTGGATAGCAAA : 10661
Typhlops_reticulatus : -----CAACCCCTTACCAACCCCAAAATCAATCTATTTTAN-----ACCTCAACCTTACCAACCCCAAAATCAATCTATTTTAN-----ACCTCAACCTTACCAACCCCAAAATCAATCTATTTTAN : 10610
Leptotyphlops_dulcis : -----CCAAACAATTTTCCCAAACTATGGGTTTCCCGCAAGCTGATACCGCCCTCAAGCAAAATATAATANAAGCCAAAATACAGGCATCACTCTAGCACTAACTGGATAGCAAA : 10608
Caiman_crocodilus : -----CCAAACAATTTTCCCAAACTATGGGTTTCCCGCAAGCTGATACCGCCCTCAAGCAAAATATAATANAAGCCAAAATACAGGCATCACTCTAGCACTAACTGGATAGCAAA : 10727
Alligator_sinensis : -----ACCAACCTTACCAACCCCAAAATCAATCTATTTTAN-----ACCTCAACCTTACCAACCCCAAAATCAATCTATTTTAN-----ACCTCAACCTTACCAACCCCAAAATCAATCTATTTTAN : 10769
Alligator_mississippiensis : -----ACCAACCTTACCAACCCCAAAATCAATCTATTTTAN-----ACCTCAACCTTACCAACCCCAAAATCAATCTATTTTAN-----ACCTCAACCTTACCAACCCCAAAATCAATCTATTTTAN : 10709
Gavialis_gangeticus : -----ACCAACCTTACCAACCCCAAAATCAATCTATTTTAN-----ACCTCAACCTTACCAACCCCAAAATCAATCTATTTTAN-----ACCTCAACCTTACCAACCCCAAAATCAATCTATTTTAN : 10737
Crocodylus_moreletii : -----ACCAACCTTACCAACCCCAAAATCAATCTATTTTAN-----ACCTCAACCTTACCAACCCCAAAATCAATCTATTTTAN-----ACCTCAACCTTACCAACCCCAAAATCAATCTATTTTAN : 10713
Dogania_subplana : -----CCACCTTACCAACCCCAAAATCAATCTATTTTAN-----ACCTCAACCTTACCAACCCCAAAATCAATCTATTTTAN-----ACCTCAACCTTACCAACCCCAAAATCAATCTATTTTAN : 10649
Pelomedusa_subrufa : -----ACCAACCTTACCAACCCCAAAATCAATCTATTTTAN-----ACCTCAACCTTACCAACCCCAAAATCAATCTATTTTAN-----ACCTCAACCTTACCAACCCCAAAATCAATCTATTTTAN : 10703
Chrysemys_picta : -----CAACCTTACCAACCCCAAAATCAATCTATTTTAN-----ACCTCAACCTTACCAACCCCAAAATCAATCTATTTTAN-----ACCTCAACCTTACCAACCCCAAAATCAATCTATTTTAN : 10709
Chelonia_mydas : -----CAACCTTACCAACCCCAAAATCAATCTATTTTAN-----ACCTCAACCTTACCAACCCCAAAATCAATCTATTTTAN-----ACCTCAACCTTACCAACCCCAAAATCAATCTATTTTAN : 10721
Tinamus_major : -----CAACCTTACCAACCCCAAAATCAATCTATTTTAN-----ACCTCAACCTTACCAACCCCAAAATCAATCTATTTTAN-----ACCTCAACCTTACCAACCCCAAAATCAATCTATTTTAN : 10697
Smithornis_sharpei : -----CAACCTTACCAACCCCAAAATCAATCTATTTTAN-----ACCTCAACCTTACCAACCCCAAAATCAATCTATTTTAN-----ACCTCAACCTTACCAACCCCAAAATCAATCTATTTTAN : 10703
Corvus_frugilegus : -----CAACCTTACCAACCCCAAAATCAATCTATTTTAN-----ACCTCAACCTTACCAACCCCAAAATCAATCTATTTTAN-----ACCTCAACCTTACCAACCCCAAAATCAATCTATTTTAN : 10715
Vidua_chalybeata : -----CAACCTTACCAACCCCAAAATCAATCTATTTTAN-----ACCTCAACCTTACCAACCCCAAAATCAATCTATTTTAN-----ACCTCAACCTTACCAACCCCAAAATCAATCTATTTTAN : 10712
Buteo_buteo : -----CAACCTTACCAACCCCAAAATCAATCTATTTTAN-----ACCTCAACCTTACCAACCCCAAAATCAATCTATTTTAN-----ACCTCAACCTTACCAACCCCAAAATCAATCTATTTTAN : 10712
Falco_peregrinus : -----CAACCTTACCAACCCCAAAATCAATCTATTTTAN-----ACCTCAACCTTACCAACCCCAAAATCAATCTATTTTAN-----ACCTCAACCTTACCAACCCCAAAATCAATCTATTTTAN : 10709
Dromaius_novaeollandiae : -----CAACCTTACCAACCCCAAAATCAATCTATTTTAN-----ACCTCAACCTTACCAACCCCAAAATCAATCTATTTTAN-----ACCTCAACCTTACCAACCCCAAAATCAATCTATTTTAN : 10703
Struthio_camelus : -----CAACCTTACCAACCCCAAAATCAATCTATTTTAN-----ACCTCAACCTTACCAACCCCAAAATCAATCTATTTTAN-----ACCTCAACCTTACCAACCCCAAAATCAATCTATTTTAN : 10709
Apteryx_haastii : -----CAACCTTACCAACCCCAAAATCAATCTATTTTAN-----ACCTCAACCTTACCAACCCCAAAATCAATCTATTTTAN-----ACCTCAACCTTACCAACCCCAAAATCAATCTATTTTAN : 10697
Rhea_americanana : -----CAACCTTACCAACCCCAAAATCAATCTATTTTAN-----ACCTCAACCTTACCAACCCCAAAATCAATCTATTTTAN-----ACCTCAACCTTACCAACCCCAAAATCAATCTATTTTAN : 10709
Gallus_gallus : -----CAACCTTACCAACCCCAAAATCAATCTATTTTAN-----ACCTCAACCTTACCAACCCCAAAATCAATCTATTTTAN-----ACCTCAACCTTACCAACCCCAAAATCAATCTATTTTAN : 10706
Ciconia_ciconia : -----CAACCTTACCAACCCCAAAATCAATCTATTTTAN-----ACCTCAACCTTACCAACCCCAAAATCAATCTATTTTAN-----ACCTCAACCTTACCAACCCCAAAATCAATCTATTTTAN : 10712
Ciconia_boyciiana : -----CAACCTTACCAACCCCAAAATCAATCTATTTTAN-----ACCTCAACCTTACCAACCCCAAAATCAATCTATTTTAN-----ACCTCAACCTTACCAACCCCAAAATCAATCTATTTTAN : 10709
Iguana_iguana : -----CAACCTTACCAACCCCAAAATCAATCTATTTTAN-----ACCTCAACCTTACCAACCCCAAAATCAATCTATTTTAN-----ACCTCAACCTTACCAACCCCAAAATCAATCTATTTTAN : 10691
Fumees_egregius : -----CAACCTTACCAACCCCAAAATCAATCTATTTTAN-----ACCTCAACCTTACCAACCCCAAAATCAATCTATTTTAN-----ACCTCAACCTTACCAACCCCAAAATCAATCTATTTTAN : 10700
Sphenodon_punctatus : -----CAACCTTACCAACCCCAAAATCAATCTATTTTAN-----ACCTCAACCTTACCAACCCCAAAATCAATCTATTTTAN-----ACCTCAACCTTACCAACCCCAAAATCAATCTATTTTAN : -
Sceloporus_occidentalis : -----ACCTCAACCTTACCAACCCCAAAATCAATCTATTTTAN-----ACCTCAACCTTACCAACCCCAAAATCAATCTATTTTAN-----ACCTCAACCTTACCAACCCCAAAATCAATCTATTTTAN : 10685
Cordylus_warreni : -----CAACCTTACCAACCCCAAAATCAATCTATTTTAN-----ACCTCAACCTTACCAACCCCAAAATCAATCTATTTTAN-----ACCTCAACCTTACCAACCCCAAAATCAATCTATTTTAN : 10694
Abronia_graminea : -----CAACCTTACCAACCCCAAAATCAATCTATTTTAN-----ACCTCAACCTTACCAACCCCAAAATCAATCTATTTTAN-----ACCTCAACCTTACCAACCCCAAAATCAATCTATTTTAN : 10697
Shinisaurus_crocodilurus : -----CAACCTTACCAACCCCAAAATCAATCTATTTTAN-----ACCTCAACCTTACCAACCCCAAAATCAATCTATTTTAN-----ACCTCAACCTTACCAACCCCAAAATCAATCTATTTTAN : 10673
Varanus_komodoensis : -----CAACCTTACCAACCCCAAAATCAATCTATTTTAN-----ACCTCAACCTTACCAACCCCAAAATCAATCTATTTTAN-----ACCTCAACCTTACCAACCCCAAAATCAATCTATTTTAN : 10709
Rhinura_floridana : -----CAACCTTACCAACCCCAAAATCAATCTATTTTAN-----ACCTCAACCTTACCAACCCCAAAATCAATCTATTTTAN-----ACCTCAACCTTACCAACCCCAAAATCAATCTATTTTAN : 10664
Geocalamus_acutus : -----CAACCTTACCAACCCCAAAATCAATCTATTTTAN-----ACCTCAACCTTACCAACCCCAAAATCAATCTATTTTAN-----ACCTCAACCTTACCAACCCCAAAATCAATCTATTTTAN : 10640
Diplometopon_zarudnyi : -----CAACCTTACCAACCCCAAAATCAATCTATTTTAN-----ACCTCAACCTTACCAACCCCAAAATCAATCTATTTTAN-----ACCTCAACCTTACCAACCCCAAAATCAATCTATTTTAN : 10667
Amphisbaena_schmidti : -----CAACCTTACCAACCCCAAAATCAATCTATTTTAN-----ACCTCAACCTTACCAACCCCAAAATCAATCTATTTTAN-----ACCTCAACCTTACCAACCCCAAAATCAATCTATTTTAN : 10649
Bipes_tridactylus : -----CAACCTTACCAACCCCAAAATCAATCTATTTTAN-----ACCTCAACCTTACCAACCCCAAAATCAATCTATTTTAN-----ACCTCAACCTTACCAACCCCAAAATCAATCTATTTTAN : 10646
Bipes_canaliculatus : -----CAACCTTACCAACCCCAAAATCAATCTATTTTAN-----ACCTCAACCTTACCAACCCCAAAATCAATCTATTTTAN-----ACCTCAACCTTACCAACCCCAAAATCAATCTATTTTAN : 10658
Bipes_biporus : -----CAACCTTACCAACCCCAAAATCAATCTATTTTAN-----ACCTCAACCTTACCAACCCCAAAATCAATCTATTTTAN-----ACCTCAACCTTACCAACCCCAAAATCAATCTATTTTAN : 10700
Anolis_carolinensis : -----CAACCTTACCAACCCCAAAATCAATCTATTTTAN-----ACCTCAACCTTACCAACCCCAAAATCAATCTATTTTAN-----ACCTCAACCTTACCAACCCCAAAATCAATCTATTTTAN : 10313
Ophisaurus_attenuatus : -----CAACCTTACCAACCCCAAAATCAATCTATTTTAN-----ACCTCAACCTTACCAACCCCAAAATCAATCTATTTTAN-----ACCTCAACCTTACCAACCCCAAAATCAATCTATTTTAN : 10317
Varanus_salvator : -----CAACCTTACCAACCCCAAAATCAATCTATTTTAN-----ACCTCAACCTTACCAACCCCAAAATCAATCTATTTTAN-----ACCTCAACCTTACCAACCCCAAAATCAATCTATTTTAN : 10700
Mertensiella_luschani : -----CAACCTTACCAACCCCAAAATCAATCTATTTTAN-----ACCTCAACCTTACCAACCCCAAAATCAATCTATTTTAN-----ACCTCAACCTTACCAACCCCAAAATCAATCTATTTTAN : 10706
Xenopus_laevis : -----CAACCTTACCAACCCCAAAATCAATCTATTTTAN-----ACCTCAACCTTACCAACCCCAAAATCAATCTATTTTAN-----ACCTCAACCTTACCAACCCCAAAATCAATCTATTTTAN : 10706

```

```

40      *      11460      *      11480      *      11500      *      11520      *      11540      *      11560      *
Bos_taurus      : GATCCACCAAAAAACAATCCG-----GGCCCAAAATAAAGGCAATACCCGGTCAAAACCAAAAAGGCCGATCAAAATATAATCTCCCTCCGCTAAACGACAAATCCCTATAGCAATAATCTATAG  : 10833
Hylobates_lar   : ACTAATACCAAAAACAATCCG-----GCCCAAAATCGCCCGCCCAATATTTTCTTAAAAAATGAAATCAAGGCTACCTCCCTCCCTCCCTCCCTCCCTCCCTCCCTCCCTCCCTCCCTCCCTCCCT  : 10842
Lemur_catta     : AACATATACCAAAAACAATCCG-----CAATCAAAAATACAAAGGCTACCTCCCTCCCTCCCTCCCTCCCTCCCTCCCTCCCTCCCTCCCTCCCTCCCTCCCTCCCTCCCTCCCTCCCTCCCT  : 10839
Nycticebus_coucang : AACATATACCAAAAACAATCCG-----CAATCAAAAATACAAAGGCTACCTCCCTCCCTCCCTCCCTCCCTCCCTCCCTCCCTCCCTCCCTCCCTCCCTCCCTCCCTCCCTCCCTCCCTCCCT  : 10842
Tarsius_bancanus : AACATATACCAAAAACAATCCG-----CAATCAAAAATACAAAGGCTACCTCCCTCCCTCCCTCCCTCCCTCCCTCCCTCCCTCCCTCCCTCCCTCCCTCCCTCCCTCCCTCCCTCCCTCCCT  : 10836
Gorilla_gorilla : ACTATACCAAAAACAATCCG-----GGCAAAAATTCAGCCCTCCCTCCCTCCCTCCCTCCCTCCCTCCCTCCCTCCCTCCCTCCCTCCCTCCCTCCCTCCCTCCCTCCCTCCCTCCCT  : 10842
Homo_sapiens    : GCTAATACCAAAAACAATCCG-----GTCACCAAAATTCAGCCCTCCCTCCCTCCCTCCCTCCCTCCCTCCCTCCCTCCCTCCCTCCCTCCCTCCCTCCCTCCCTCCCTCCCTCCCTCCCT  : 10833
Papio_hamadryas : ATCAATACCAAAAACAATCCG-----CAATCAAAAATACAAAGGCTACCTCCCTCCCTCCCTCCCTCCCTCCCTCCCTCCCTCCCTCCCTCCCTCCCTCCCTCCCTCCCTCCCTCCCTCCCT  : 10842
Cebus_albifrons : ATCAATACCAAAAACAATCCG-----CAATCAAAAATACAAAGGCTACCTCCCTCCCTCCCTCCCTCCCTCCCTCCCTCCCTCCCTCCCTCCCTCCCTCCCTCCCTCCCTCCCTCCCTCCCT  : 10830
Macaca_sylvanus : ATCAATACCAAAAACAATCCG-----CAATCAAAAATACAAAGGCTACCTCCCTCCCTCCCTCCCTCCCTCCCTCCCTCCCTCCCTCCCTCCCTCCCTCCCTCCCTCCCTCCCTCCCTCCCT  : 10839
Pongo_pygmaeus  : ACTAATACCAAAAACAATCCG-----GTCACCAAAATTCAGCCCTCCCTCCCTCCCTCCCTCCCTCCCTCCCTCCCTCCCTCCCTCCCTCCCTCCCTCCCTCCCTCCCTCCCTCCCTCCCT  : 10842
Pan_paniscus    : ACTAATACCAAAAACAATCCG-----GTCACCAAAATTCAGCCCTCCCTCCCTCCCTCCCTCCCTCCCTCCCTCCCTCCCTCCCTCCCTCCCTCCCTCCCTCCCTCCCTCCCTCCCTCCCT  : 10842
Agkistrodon_piscivorus : ATAGGCCCAAAAGGCTCCCTCAAAA-----ACAAATCCCAAAATTCAGCCCTCCCTCCCTCCCTCCCTCCCTCCCTCCCTCCCTCCCTCCCTCCCTCCCTCCCTCCCTCCCTCCCTCCCTCCCT  : 10752
Pantherophis_guttatus : CTAGGCCCAAAAGGCTCCCTCAAAA-----ACAATCCCAAAATTCAGCCCTCCCTCCCTCCCTCCCTCCCTCCCTCCCTCCCTCCCTCCCTCCCTCCCTCCCTCCCTCCCTCCCTCCCTCCCT  : 10731
Dinodon_semicarinatus : CTAGGCCCAAAAGGCTCCCTCAAAA-----ACAATCCCAAAATTCAGCCCTCCCTCCCTCCCTCCCTCCCTCCCTCCCTCCCTCCCTCCCTCCCTCCCTCCCTCCCTCCCTCCCTCCCTCCCT  : 10734
Boa_constrictor : CTAGGCCCAAAAGGCTCCCTCAAAA-----ACAATCCCAAAATTCAGCCCTCCCTCCCTCCCTCCCTCCCTCCCTCCCTCCCTCCCTCCCTCCCTCCCTCCCTCCCTCCCTCCCTCCCTCCCT  : 10782
Python_regius   : CTAGGCCCAAAAGGCTCCCTCAAAA-----ACAATCCCAAAATTCAGCCCTCCCTCCCTCCCTCCCTCCCTCCCTCCCTCCCTCCCTCCCTCCCTCCCTCCCTCCCTCCCTCCCTCCCTCCCT  : 10782
Acrochordus_granulatus : ATAGGCCCAAAAGGCTCCCTCAAAA-----ACAATCCCAAAATTCAGCCCTCCCTCCCTCCCTCCCTCCCTCCCTCCCTCCCTCCCTCCCTCCCTCCCTCCCTCCCTCCCTCCCTCCCTCCCT  : 10764
Cylindrophis_ruffus : ATAGGCCCAAAAGGCTCCCTCAAAA-----ACAATCCCAAAATTCAGCCCTCCCTCCCTCCCTCCCTCCCTCCCTCCCTCCCTCCCTCCCTCCCTCCCTCCCTCCCTCCCTCCCTCCCTCCCT  : 10746
Ovophis_okinavensis : ATAGGCCCAAAAGGCTCCCTCAAAA-----ACAATCCCAAAATTCAGCCCTCCCTCCCTCCCTCCCTCCCTCCCTCCCTCCCTCCCTCCCTCCCTCCCTCCCTCCCTCCCTCCCTCCCTCCCT  : 10749
Xenopeltis_unicolor : ATAGGCCCAAAAGGCTCCCTCAAAA-----ACAATCCCAAAATTCAGCCCTCCCTCCCTCCCTCCCTCCCTCCCTCCCTCCCTCCCTCCCTCCCTCCCTCCCTCCCTCCCTCCCTCCCTCCCT  : 10788
Typhlops_reticulatus : ATAGGCCCAAAAGGCTCCCTCAAAA-----ACAATCCCAAAATTCAGCCCTCCCTCCCTCCCTCCCTCCCTCCCTCCCTCCCTCCCTCCCTCCCTCCCTCCCTCCCTCCCTCCCTCCCTCCCT  : 10737
Leptotyphlops_dulcis : CTAGGCCCAAAAGGCTCCCTCAAAA-----GTCACCAAAATTCAGCCCTCCCTCCCTCCCTCCCTCCCTCCCTCCCTCCCTCCCTCCCTCCCTCCCTCCCTCCCTCCCTCCCTCCCTCCCT  : 10735
Caiman_crocodilus : ATAGGCCCAAAAGGCTCCCTCAAAA-----ACAATCCCAAAATTCAGCCCTCCCTCCCTCCCTCCCTCCCTCCCTCCCTCCCTCCCTCCCTCCCTCCCTCCCTCCCTCCCTCCCTCCCTCCCT  : 10857
Alligator_sinensis : ATAGGCCCAAAAGGCTCCCTCAAAA-----ACAATCCCAAAATTCAGCCCTCCCTCCCTCCCTCCCTCCCTCCCTCCCTCCCTCCCTCCCTCCCTCCCTCCCTCCCTCCCTCCCTCCCTCCCT  : 10899
Alligator_mississippiensis : ATAGGCCCAAAAGGCTCCCTCAAAA-----ACAATCCCAAAATTCAGCCCTCCCTCCCTCCCTCCCTCCCTCCCTCCCTCCCTCCCTCCCTCCCTCCCTCCCTCCCTCCCTCCCTCCCTCCCT  : 10839
Gavialis_gangeticus : ATAGGCCCAAAAGGCTCCCTCAAAA-----ACAATCCCAAAATTCAGCCCTCCCTCCCTCCCTCCCTCCCTCCCTCCCTCCCTCCCTCCCTCCCTCCCTCCCTCCCTCCCTCCCTCCCTCCCT  : 10867
Crocodylus_moreletii : ATAGGCCCAAAAGGCTCCCTCAAAA-----ACAATCCCAAAATTCAGCCCTCCCTCCCTCCCTCCCTCCCTCCCTCCCTCCCTCCCTCCCTCCCTCCCTCCCTCCCTCCCTCCCTCCCTCCCT  : 10843
Dogania_subplana : ATAGGCCCAAAAGGCTCCCTCAAAA-----ACAATCCCAAAATTCAGCCCTCCCTCCCTCCCTCCCTCCCTCCCTCCCTCCCTCCCTCCCTCCCTCCCTCCCTCCCTCCCTCCCTCCCTCCCT  : 10773
Pelomedusa_subrufa : ATAGGCCCAAAAGGCTCCCTCAAAA-----ACAATCCCAAAATTCAGCCCTCCCTCCCTCCCTCCCTCCCTCCCTCCCTCCCTCCCTCCCTCCCTCCCTCCCTCCCTCCCTCCCTCCCTCCCT  : 10830
Chrysemys_picta : ATAGGCCCAAAAGGCTCCCTCAAAA-----ACAATCCCAAAATTCAGCCCTCCCTCCCTCCCTCCCTCCCTCCCTCCCTCCCTCCCTCCCTCCCTCCCTCCCTCCCTCCCTCCCTCCCTCCCT  : 10839
Chelonia_mydas : ATAGGCCCAAAAGGCTCCCTCAAAA-----ACAATCCCAAAATTCAGCCCTCCCTCCCTCCCTCCCTCCCTCCCTCCCTCCCTCCCTCCCTCCCTCCCTCCCTCCCTCCCTCCCTCCCTCCCT  : 10851
Tinamus_major   : ATAGGCCCAAAAGGCTCCCTCAAAA-----ACAATCCCAAAATTCAGCCCTCCCTCCCTCCCTCCCTCCCTCCCTCCCTCCCTCCCTCCCTCCCTCCCTCCCTCCCTCCCTCCCTCCCTCCCT  : 10827
Smithornis_sharpei : ATAGGCCCAAAAGGCTCCCTCAAAA-----ACAATCCCAAAATTCAGCCCTCCCTCCCTCCCTCCCTCCCTCCCTCCCTCCCTCCCTCCCTCCCTCCCTCCCTCCCTCCCTCCCTCCCTCCCT  : 10833
Corvus_frugilegus : ATAGGCCCAAAAGGCTCCCTCAAAA-----ACAATCCCAAAATTCAGCCCTCCCTCCCTCCCTCCCTCCCTCCCTCCCTCCCTCCCTCCCTCCCTCCCTCCCTCCCTCCCTCCCTCCCTCCCT  : 10845
Vidua_chalybeata : ATAGGCCCAAAAGGCTCCCTCAAAA-----ACAATCCCAAAATTCAGCCCTCCCTCCCTCCCTCCCTCCCTCCCTCCCTCCCTCCCTCCCTCCCTCCCTCCCTCCCTCCCTCCCTCCCTCCCT  : 10842
Buteo_buteo     : ATAGGCCCAAAAGGCTCCCTCAAAA-----ACAATCCCAAAATTCAGCCCTCCCTCCCTCCCTCCCTCCCTCCCTCCCTCCCTCCCTCCCTCCCTCCCTCCCTCCCTCCCTCCCTCCCTCCCT  : 10842
Falco_peregrinus : ATAGGCCCAAAAGGCTCCCTCAAAA-----ACAATCCCAAAATTCAGCCCTCCCTCCCTCCCTCCCTCCCTCCCTCCCTCCCTCCCTCCCTCCCTCCCTCCCTCCCTCCCTCCCTCCCTCCCT  : 10839
Dromaius_novaeollandiae : ATAGGCCCAAAAGGCTCCCTCAAAA-----ACAATCCCAAAATTCAGCCCTCCCTCCCTCCCTCCCTCCCTCCCTCCCTCCCTCCCTCCCTCCCTCCCTCCCTCCCTCCCTCCCTCCCTCCCT  : 10833
Struthio_camelus : ATAGGCCCAAAAGGCTCCCTCAAAA-----ACAATCCCAAAATTCAGCCCTCCCTCCCTCCCTCCCTCCCTCCCTCCCTCCCTCCCTCCCTCCCTCCCTCCCTCCCTCCCTCCCTCCCTCCCT  : 10839
Apteryx_haastii : ATAGGCCCAAAAGGCTCCCTCAAAA-----ACAATCCCAAAATTCAGCCCTCCCTCCCTCCCTCCCTCCCTCCCTCCCTCCCTCCCTCCCTCCCTCCCTCCCTCCCTCCCTCCCTCCCTCCCT  : 10827
Rhea_americanana : ATAGGCCCAAAAGGCTCCCTCAAAA-----ACAATCCCAAAATTCAGCCCTCCCTCCCTCCCTCCCTCCCTCCCTCCCTCCCTCCCTCCCTCCCTCCCTCCCTCCCTCCCTCCCTCCCTCCCT  : 10839
Gallus_gallus   : ATAGGCCCAAAAGGCTCCCTCAAAA-----ACAATCCCAAAATTCAGCCCTCCCTCCCTCCCTCCCTCCCTCCCTCCCTCCCTCCCTCCCTCCCTCCCTCCCTCCCTCCCTCCCTCCCTCCCT  : 10836
Ciconia_ciconia : ATAGGCCCAAAAGGCTCCCTCAAAA-----ACAATCCCAAAATTCAGCCCTCCCTCCCTCCCTCCCTCCCTCCCTCCCTCCCTCCCTCCCTCCCTCCCTCCCTCCCTCCCTCCCTCCCTCCCT  : 10842
Ciconia_boyciana : ATAGGCCCAAAAGGCTCCCTCAAAA-----ACAATCCCAAAATTCAGCCCTCCCTCCCTCCCTCCCTCCCTCCCTCCCTCCCTCCCTCCCTCCCTCCCTCCCTCCCTCCCTCCCTCCCTCCCT  : 10839
Iguana_iguana   : ATAGGCCCAAAAGGCTCCCTCAAAA-----ACAATCCCAAAATTCAGCCCTCCCTCCCTCCCTCCCTCCCTCCCTCCCTCCCTCCCTCCCTCCCTCCCTCCCTCCCTCCCTCCCTCCCTCCCT  : 10818
Fumecea_egregius : ATAGGCCCAAAAGGCTCCCTCAAAA-----ACAATCCCAAAATTCAGCCCTCCCTCCCTCCCTCCCTCCCTCCCTCCCTCCCTCCCTCCCTCCCTCCCTCCCTCCCTCCCTCCCTCCCTCCCT  : 10827
Sphenodon_punctatus : ATAGGCCCAAAAGGCTCCCTCAAAA-----ACAATCCCAAAATTCAGCCCTCCCTCCCTCCCTCCCTCCCTCCCTCCCTCCCTCCCTCCCTCCCTCCCTCCCTCCCTCCCTCCCTCCCTCCCT  : -
Sceloporus_occidentalis : ATAGGCCCAAAAGGCTCCCTCAAAA-----ACAATCCCAAAATTCAGCCCTCCCTCCCTCCCTCCCTCCCTCCCTCCCTCCCTCCCTCCCTCCCTCCCTCCCTCCCTCCCTCCCTCCCTCCCT  : 10812
Cordylus_warreni : ATAGGCCCAAAAGGCTCCCTCAAAA-----ACAATCCCAAAATTCAGCCCTCCCTCCCTCCCTCCCTCCCTCCCTCCCTCCCTCCCTCCCTCCCTCCCTCCCTCCCTCCCTCCCTCCCTCCCT  : 10824
Abronia_graminea : ATAGGCCCAAAAGGCTCCCTCAAAA-----ACAATCCCAAAATTCAGCCCTCCCTCCCTCCCTCCCTCCCTCCCTCCCTCCCTCCCTCCCTCCCTCCCTCCCTCCCTCCCTCCCTCCCTCCCT  : 10824
Shinisaurus_crocodilurus : ATAGGCCCAAAAGGCTCCCTCAAAA-----ACAATCCCAAAATTCAGCCCTCCCTCCCTCCCTCCCTCCCTCCCTCCCTCCCTCCCTCCCTCCCTCCCTCCCTCCCTCCCTCCCTCCCTCCCT  : 10800
Varanus_komodoensis : ATAGGCCCAAAAGGCTCCCTCAAAA-----ACAATCCCAAAATTCAGCCCTCCCTCCCTCCCTCCCTCCCTCCCTCCCTCCCTCCCTCCCTCCCTCCCTCCCTCCCTCCCTCCCTCCCTCCCT  : 10833
Rhineura_floridana : ATAGGCCCAAAAGGCTCCCTCAAAA-----ACAATCCCAAAATTCAGCCCTCCCTCCCTCCCTCCCTCCCTCCCTCCCTCCCTCCCTCCCTCCCTCCCTCCCTCCCTCCCTCCCTCCCTCCCT  : 10794
Geocalamus_acutus : ATAGGCCCAAAAGGCTCCCTCAAAA-----ACAATCCCAAAATTCAGCCCTCCCTCCCTCCCTCCCTCCCTCCCTCCCTCCCTCCCTCCCTCCCTCCCTCCCTCCCTCCCTCCCTCCCTCCCT  : 10770
Diplometopon_zarudnyi : ATAGGCCCAAAAGGCTCCCTCAAAA-----ACAATCCCAAAATTCAGCCCTCCCTCCCTCCCTCCCTCCCTCCCTCCCTCCCTCCCTCCCTCCCTCCCTCCCTCCCTCCCTCCCTCCCTCCCT  : 10797
Amphisbaena_schmidti : ATAGGCCCAAAAGGCTCCCTCAAAA-----ACAATCCCAAAATTCAGCCCTCCCTCCCTCCCTCCCTCCCTCCCTCCCTCCCTCCCTCCCTCCCTCCCTCCCTCCCTCCCTCCCTCCCTCCCT  : 10776
Bipes_tridactylus : ATAGGCCCAAAAGGCTCCCTCAAAA-----ACAATCCCAAAATTCAGCCCTCCCTCCCTCCCTCCCTCCCTCCCTCCCTCCCTCCCTCCCTCCCTCCCTCCCTCCCTCCCTCCCTCCCTCCCT  : 10770
Bipes_capaliculatus : ATAGGCCCAAAAGGCTCCCTCAAAA-----ACAATCCCAAAATTCAGCCCTCCCTCCCTCCCTCCCTCCCTCCCTCCCTCCCTCCCTCCCTCCCTCCCTCCCTCCCTCCCTCCCTCCCTCCCT  : 10779
Bipes_banari : ATAGGCCCAAAAGGCTCCCTCAAAA-----ACAATCCCAAAATTCAGCCCTCCCTCCCTCCCTCCCTCCCTCCCTCCCTCCCTCCCTCCCTCCCTCCCTCCCTCCCTCCCTCCCTCCCTCCCT  : 10824
Anolis_carolinensis : ATAGGCCCAAAAGGCTCCCTCAAAA-----ACAATCCCAAAATTCAGCCCTCCCTCCCTCCCTCCCTCCCTCCCTCCCTCCCTCCCTCCCTCCCTCCCTCCCTCCCTCCCTCCCTCCCTCCCT  : 10443
Ophisaurus_atnuatus : ATAGGCCCAAAAGGCTCCCTCAAAA-----ACAATCCCAAAATTCAGCCCTCCCTCCCTCCCTCCCTCCCTCCCTCCCTCCCTCCCTCCCTCCCTCCCTCCCTCCCTCCCTCCCTCCCTCCCT  : 10444
Varanus_salvator : ATAGGCCCAAAAGGCTCCCTCAAAA-----ACAATCCCAAAATTCAGCCCTCCCTCCCTCCCTCCCTCCCTCCCTCCCTCCCTCCCTCCCTCCCTCCCTCCCTCCCTCCCTCCCTCCCTCCCT  : 10824
Mertensiella_luschani : ATAGGCCCAAAAGGCTCCCTCAAAA-----ACAATCCCAAAATTCAGCCCTCCCTCCCTCCCTCCCTCCCTCCCTCCCTCCCTCCCTCCCTCCCTCCCTCCCTCCCTCCCTCCCTCCCTCCCT  : 10833
Xenopus_laevis  : ATAGGCCCAAAAGGCTCCCTCAAAA-----ACAATCCCAAAATTCAGCCCTCCCTCCCTCCCTCCCTCCCTCCCTCCCTCCCTCCCTCCCTCCCTCCCTCCCTCCCTCCCTCCCTCCCTCCCT  : 10836

```





|                            | * | 11720 | * | 11740 | * | 11760 | * | 11780 | * | 11800 | * | 11820 | * | 11    |
|----------------------------|---|-------|---|-------|---|-------|---|-------|---|-------|---|-------|---|-------|
| Bos_taurus                 | : | A     | C | A     | G | C     | A | A     | G | G     | A | G     | G | 10997 |
| Hylobates_lar              | : | A     | C | A     | G | C     | A | A     | G | G     | A | G     | G | 10994 |
| Lemur_catta                | : | A     | C | A     | G | C     | A | A     | G | G     | A | G     | G | 10988 |
| Nycticebus_coucang         | : | A     | C | A     | G | C     | A | A     | G | G     | A | G     | G | 10994 |
| Tarsius_bancanus           | : | A     | C | A     | G | C     | A | A     | G | G     | A | G     | G | 10988 |
| Gorilla_gorilla            | : | A     | C | A     | G | C     | A | A     | G | G     | A | G     | G | 10994 |
| Homo_sapiens               | : | A     | C | A     | G | C     | A | A     | G | G     | A | G     | G | 10985 |
| Papio_hamadryas            | : | A     | C | A     | G | C     | A | A     | G | G     | A | G     | G | 10994 |
| Cebus_albifrons            | : | A     | C | A     | G | C     | A | A     | G | G     | A | G     | G | 10982 |
| Macaca_sylvanus            | : | A     | C | A     | G | C     | A | A     | G | G     | A | G     | G | 10991 |
| Pongo_pygmaeus             | : | A     | C | A     | G | C     | A | A     | G | G     | A | G     | G | 10994 |
| Pan_paniscus               | : | A     | C | A     | G | C     | A | A     | G | G     | A | G     | G | 10994 |
| Agkistrodon_piscivorus     | : | A     | C | A     | G | C     | A | A     | G | G     | A | G     | G | 10907 |
| Pantherophis_guttatus      | : | A     | C | A     | G | C     | A | A     | G | G     | A | G     | G | 10886 |
| Dinodon_semicarinatus      | : | A     | C | A     | G | C     | A | A     | G | G     | A | G     | G | 10892 |
| Boa_constrictor            | : | A     | C | A     | G | C     | A | A     | G | G     | A | G     | G | 10937 |
| Python_regius              | : | A     | C | A     | G | C     | A | A     | G | G     | A | G     | G | 10937 |
| Acrochordus_granulatus     | : | A     | C | A     | G | C     | A | A     | G | G     | A | G     | G | 10919 |
| Cylindrophis_ruffus        | : | A     | C | A     | G | C     | A | A     | G | G     | A | G     | G | 10904 |
| Ovophis_okinavensis        | : | A     | C | A     | G | C     | A | A     | G | G     | A | G     | G | 10907 |
| Xenopeltis_unicolor        | : | A     | C | A     | G | C     | A | A     | G | G     | A | G     | G | 10943 |
| Typhlops_reticulatus       | : | A     | C | A     | G | C     | A | A     | G | G     | A | G     | G | 10901 |
| Leptotyphlops_dulcis       | : | A     | C | A     | G | C     | A | A     | G | G     | A | G     | G | 10899 |
| Caiman_crocodilus          | : | A     | C | A     | G | C     | A | A     | G | G     | A | G     | G | 11003 |
| Alligator_sinensis         | : | A     | C | A     | G | C     | A | A     | G | G     | A | G     | G | 11051 |
| Alligator_mississippiensis | : | A     | C | A     | G | C     | A | A     | G | G     | A | G     | G | 11000 |
| Gavialis_gangeticus        | : | A     | C | A     | G | C     | A | A     | G | G     | A | G     | G | 11067 |
| Crocodylus_moreletii       | : | A     | C | A     | G | C     | A | A     | G | G     | A | G     | G | 11043 |
| Dogania_subplana           | : | A     | C | A     | G | C     | A | A     | G | G     | A | G     | G | 10922 |
| Pelomedusa_subrufa         | : | A     | C | A     | G | C     | A | A     | G | G     | A | G     | G | 10985 |
| Chrysemys_picta            | : | A     | C | A     | G | C     | A | A     | G | G     | A | G     | G | 11000 |
| Chelonia_mydas             | : | A     | C | A     | G | C     | A | A     | G | G     | A | G     | G | 11000 |
| Tinanus_major              | : | A     | C | A     | G | C     | A | A     | G | G     | A | G     | G | 10976 |
| Smithornis_sharpei         | : | A     | C | A     | G | C     | A | A     | G | G     | A | G     | G | 10982 |
| Corvus_frugilegus          | : | A     | C | A     | G | C     | A | A     | G | G     | A | G     | G | 10997 |
| Vidua_chalybeata           | : | A     | C | A     | G | C     | A | A     | G | G     | A | G     | G | 10994 |
| Buteo_buteo                | : | A     | C | A     | G | C     | A | A     | G | G     | A | G     | G | 10994 |
| Falco_peregrinus           | : | A     | C | A     | G | C     | A | A     | G | G     | A | G     | G | 10997 |
| Dromaius_novaehollandiae   | : | A     | C | A     | G | C     | A | A     | G | G     | A | G     | G | 10985 |
| Struthio_camelus           | : | A     | C | A     | G | C     | A | A     | G | G     | A | G     | G | 10991 |
| Apteryx_haastii            | : | A     | C | A     | G | C     | A | A     | G | G     | A | G     | G | 10976 |
| Rhea_americanana           | : | A     | C | A     | G | C     | A | A     | G | G     | A | G     | G | 10994 |
| Gallus_gallus              | : | A     | C | A     | G | C     | A | A     | G | G     | A | G     | G | 10991 |
| Ciconia_ciconia            | : | A     | C | A     | G | C     | A | A     | G | G     | A | G     | G | 10991 |
| Ciconia_boycciana          | : | A     | C | A     | G | C     | A | A     | G | G     | A | G     | G | 10988 |
| Iguana_iguana              | : | A     | C | A     | G | C     | A | A     | G | G     | A | G     | G | 10970 |
| Eumeces_egregius           | : | A     | C | A     | G | C     | A | A     | G | G     | A | G     | G | 10979 |
| Sphenodon_punctatus        | : | A     | C | A     | G | C     | A | A     | G | G     | A | G     | G | 9173  |
| Sceloporus_occidentalis    | : | A     | C | A     | G | C     | A | A     | G | G     | A | G     | G | 10964 |
| Cordylus_warreni           | : | A     | C | A     | G | C     | A | A     | G | G     | A | G     | G | 10979 |
| Abronia_graminea           | : | A     | C | A     | G | C     | A | A     | G | G     | A | G     | G | 10988 |
| Shinisaurus_crocodilurus   | : | A     | C | A     | G | C     | A | A     | G | G     | A | G     | G | 10949 |
| Varanus_komodoensis        | : | A     | C | A     | G | C     | A | A     | G | G     | A | G     | G | 11000 |
| Rhineura_floridana         | : | A     | C | A     | G | C     | A | A     | G | G     | A | G     | G | 10970 |
| Geocalamus_acutus          | : | A     | C | A     | G | C     | A | A     | G | G     | A | G     | G | 10919 |
| Diplometopon_zarudnyi      | : | A     | C | A     | G | C     | A | A     | G | G     | A | G     | G | 10946 |
| Amphisbaena_schmidti       | : | A     | C | A     | G | C     | A | A     | G | G     | A | G     | G | 10925 |
| Bipes_tridactylus          | : | A     | C | A     | G | C     | A | A     | G | G     | A | G     | G | 10919 |
| Bipes_canaliculatus        | : | A     | C | A     | G | C     | A | A     | G | G     | A | G     | G | 10928 |
| Bipes_biporus              | : | A     | C | A     | G | C     | A | A     | G | G     | A | G     | G | 10973 |
| Anolis_carolinensis        | : | A     | C | A     | G | C     | A | A     | G | G     | A | G     | G | 10679 |
| Ophisaurus_atnuatus        | : | A     | C | A     | G | C     | A | A     | G | G     | A | G     | G | 10607 |
| Varanus_salvator           | : | A     | C | A     | G | C     | A | A     | G | G     | A | G     | G | 10982 |
| Mertensiella_luschani      | : | A     | C | A     | G | C     | A | A     | G | G     | A | G     | G | 10991 |
| Xenopus_laevis             | : | A     | C | A     | G | C     | A | A     | G | G     | A | G     | G | 10985 |

|                            | 840 | *      | 11860 | *       | 11880 | *      | 11900 | *     | 11920 | *     | 11940  | *     | 11960 | *    |      |       |    |       |     |      |    |    |    |    |    |       |       |
|----------------------------|-----|--------|-------|---------|-------|--------|-------|-------|-------|-------|--------|-------|-------|------|------|-------|----|-------|-----|------|----|----|----|----|----|-------|-------|
| Bos_taurus                 | :   | TTGGG  | CAAGC | CTTTTAA | TATAG | GGGAGG | AAAG  | GGTAC | TTTGC | TATA  | AAAGCC | AGGTA | AGAA  | AGAT | CGAA | TTTGC | TA | AAGCC | TTT | AGCC | AA | TT | GT | AG | :  | 11130 |       |
| Hylobates_lar              | :   | TTGGG  | CAAGC | CTTTTAA | TATAG | GGGAGG | AAAG  | GGTAC | TTTGC | TATA  | AAAGCC | AGGTA | AGAA  | AGAT | CGAA | TTTGC | TA | AAGCC | TTT | AGCC | AA | TT | GT | AG | :  | 11127 |       |
| Lemur_catta                | :   | TAAGGG | TAAAG | CTTTTAA | TATAG | GGGAGG | AAAG  | GGTAC | TTTGC | TATA  | AAAGCC | AGGTA | AGAA  | AGAT | CGAA | TTTGC | TA | AAGCC | TTT | AGCC | AA | TT | GT | AG | :  | 11121 |       |
| Nycticebus_coucang         | :   | TAAGGG | TAAAG | CTTTTAA | TATAG | GGGAGG | AAAG  | GGTAC | TTTGC | TATA  | AAAGCC | AGGTA | AGAA  | AGAT | CGAA | TTTGC | TA | AAGCC | TTT | AGCC | AA | TT | GT | AG | :  | 11127 |       |
| Tarsius_bancanus           | :   | TAAGGG | TAAAG | CTTTTAA | TATAG | GGGAGG | AAAG  | GGTAC | TTTGC | TATA  | AAAGCC | AGGTA | AGAA  | AGAT | CGAA | TTTGC | TA | AAGCC | TTT | AGCC | AA | TT | GT | AG | :  | 11121 |       |
| Gorilla_gorilla            | :   | TAAGGG | TAAAG | CTTTTAA | TATAG | GGGAGG | AAAG  | GGTAC | TTTGC | TATA  | AAAGCC | AGGTA | AGAA  | AGAT | CGAA | TTTGC | TA | AAGCC | TTT | AGCC | AA | TT | GT | AG | :  | 11127 |       |
| Homo_sapiens               | :   | TAAGGG | TAAAG | CTTTTAA | TATAG | GGGAGG | AAAG  | GGTAC | TTTGC | TATA  | AAAGCC | AGGTA | AGAA  | AGAT | CGAA | TTTGC | TA | AAGCC | TTT | AGCC | AA | TT | GT | AG | :  | 11118 |       |
| Papio_hamadryas            | :   | TAAGGG | TAAAG | CTTTTAA | TATAG | GGGAGG | AAAG  | GGTAC | TTTGC | TATA  | AAAGCC | AGGTA | AGAA  | AGAT | CGAA | TTTGC | TA | AAGCC | TTT | AGCC | AA | TT | GT | AG | :  | 11127 |       |
| Cebus_albifrons            | :   | TAAGGG | TAAAG | CTTTTAA | TATAG | GGGAGG | AAAG  | GGTAC | TTTGC | TATA  | AAAGCC | AGGTA | AGAA  | AGAT | CGAA | TTTGC | TA | AAGCC | TTT | AGCC | AA | TT | GT | AG | :  | 11115 |       |
| Macaca_sylvanus            | :   | TAAGGG | TAAAG | CTTTTAA | TATAG | GGGAGG | AAAG  | GGTAC | TTTGC | TATA  | AAAGCC | AGGTA | AGAA  | AGAT | CGAA | TTTGC | TA | AAGCC | TTT | AGCC | AA | TT | GT | AG | :  | 11124 |       |
| Pongo_pygmaeus             | :   | TAAGGG | TAAAG | CTTTTAA | TATAG | GGGAGG | AAAG  | GGTAC | TTTGC | TATA  | AAAGCC | AGGTA | AGAA  | AGAT | CGAA | TTTGC | TA | AAGCC | TTT | AGCC | AA | TT | GT | AG | :  | 11127 |       |
| Pan_paniscus               | :   | TAAGGG | TAAAG | CTTTTAA | TATAG | GGGAGG | AAAG  | GGTAC | TTTGC | TATA  | AAAGCC | AGGTA | AGAA  | AGAT | CGAA | TTTGC | TA | AAGCC | TTT | AGCC | AA | TT | GT | AG | :  | 11127 |       |
| Agkistrodon_piscivorus     | :   | TCGGCC | TGAA  | CTATA   | TGCTA | GGGGGA | TGGT  | TCAT  | TTTGG | TATAT | CGG    | GGG   | AAAAG | GGGG | AGCC | TC    | TC | TC    | TC  | TC   | TC | TC | TC | TC | TC | :     | 11034 |
| Pantherophis_guttatus      | :   | TCGGCC | TGAA  | CTATA   | TGCTA | GGGGGA | TGGT  | TCAT  | TTTGG | TATAT | CGG    | GGG   | AAAAG | GGGG | AGCC | TC    | TC | TC    | TC  | TC   | TC | TC | TC | TC | TC | :     | 11013 |
| Dinodon_semicarinatus      | :   | TCGGCC | TGAA  | CTATA   | TGCTA | GGGGGA | TGGT  | TCAT  | TTTGG | TATAT | CGG    | GGG   | AAAAG | GGGG | AGCC | TC    | TC | TC    | TC  | TC   | TC | TC | TC | TC | TC | :     | 11019 |
| Boa_constrictor            | :   | TCGGCC | TGAA  | CTATA   | TGCTA | GGGGGA | TGGT  | TCAT  | TTTGG | TATAT | CGG    | GGG   | AAAAG | GGGG | AGCC | TC    | TC | TC    | TC  | TC   | TC | TC | TC | TC | TC | :     | 11064 |
| Python_regius              | :   | TCGGCC | TGAA  | CTATA   | TGCTA | GGGGGA | TGGT  | TCAT  | TTTGG | TATAT | CGG    | GGG   | AAAAG | GGGG | AGCC | TC    | TC | TC    | TC  | TC   | TC | TC | TC | TC | TC | :     | 11064 |
| Acrochordus_granulatus     | :   | TCGGCC | TGAA  | CTATA   | TGCTA | GGGGGA | TGGT  | TCAT  | TTTGG | TATAT | CGG    | GGG   | AAAAG | GGGG | AGCC | TC    | TC | TC    | TC  | TC   | TC | TC | TC | TC | TC | :     | 11046 |
| Cylindrophis_ruffus        | :   | TCGGCC | TGAA  | CTATA   | TGCTA | GGGGGA | TGGT  | TCAT  | TTTGG | TATAT | CGG    | GGG   | AAAAG | GGGG | AGCC | TC    | TC | TC    | TC  | TC   | TC | TC | TC | TC | TC | :     | 11031 |
| Ovophis_okinavensis        | :   | TCGGCC | TGAA  | CTATA   | TGCTA | GGGGGA | TGGT  | TCAT  | TTTGG | TATAT | CGG    | GGG   | AAAAG | GGGG | AGCC | TC    | TC | TC    | TC  | TC   | TC | TC | TC | TC | TC | :     | 11034 |
| Xenopeltis_unicolor        | :   | TCGGCC | TGAA  | CTATA   | TGCTA | GGGGGA | TGGT  | TCAT  | TTTGG | TATAT | CGG    | GGG   | AAAAG | GGGG | AGCC | TC    | TC | TC    | TC  | TC   | TC | TC | TC | TC | TC | :     | 11070 |
| Typhlops_reticulatus       | :   | TCGGCC | TGAA  | CTATA   | TGCTA | GGGGGA | TGGT  | TCAT  | TTTGG | TATAT | CGG    | GGG   | AAAAG | GGGG | AGCC | TC    | TC | TC    | TC  | TC   | TC | TC | TC | TC | TC | :     | 11028 |
| Leptotyphlops_dulcis       | :   | TCGGCC | TGAA  | CTATA   | TGCTA | GGGGGA | TGGT  | TCAT  | TTTGG | TATAT | CGG    | GGG   | AAAAG | GGGG | AGCC | TC    | TC | TC    | TC  | TC   | TC | TC | TC | TC | TC | :     | 11032 |
| Caiman_crocodilus          | :   | TAAGGG | TAAAG | CTTTTAA | TATAG | GGGAGG | AAAG  | GGTAC | TTTGC | TATA  | AAAGCC | AGGTA | AGAA  | AGAT | CGAA | TTTGC | TA | AAGCC | TTT | AGCC | AA | TT | GT | AG | :  | 11127 |       |
| Alligator_sinensis         | :   | TAAGGG | TAAAG | CTTTTAA | TATAG | GGGAGG | AAAG  | GGTAC | TTTGC | TATA  | AAAGCC | AGGTA | AGAA  | AGAT | CGAA | TTTGC | TA | AAGCC | TTT | AGCC | AA | TT | GT | AG | :  | 11184 |       |
| Alligator_mississippiensis | :   | TAAGGG | TAAAG | CTTTTAA | TATAG | GGGAGG | AAAG  | GGTAC | TTTGC | TATA  | AAAGCC | AGGTA | AGAA  | AGAT | CGAA | TTTGC | TA | AAGCC | TTT | AGCC | AA | TT | GT | AG | :  | 11133 |       |
| Gavialis_gangeticus        | :   | TAAGGG | TAAAG | CTTTTAA | TATAG | GGGAGG | AAAG  | GGTAC | TTTGC | TATA  | AAAGCC | AGGTA | AGAA  | AGAT | CGAA | TTTGC | TA | AAGCC | TTT | AGCC | AA | TT | GT | AG | :  | 11200 |       |
| Crocodylus_moreletii       | :   | TAAGGG | TAAAG | CTTTTAA | TATAG | GGGAGG | AAAG  | GGTAC | TTTGC | TATA  | AAAGCC | AGGTA | AGAA  | AGAT | CGAA | TTTGC | TA | AAGCC | TTT | AGCC | AA | TT | GT | AG | :  | 11176 |       |
| Dogania_subplana           | :   | TAAGGG | TAAAG | CTTTTAA | TATAG | GGGAGG | AAAG  | GGTAC | TTTGC | TATA  | AAAGCC | AGGTA | AGAA  | AGAT | CGAA | TTTGC | TA | AAGCC | TTT | AGCC | AA | TT | GT | AG | :  | 11055 |       |
| Pelomedusa_subrufa         | :   | TAAGGG | TAAAG | CTTTTAA | TATAG | GGGAGG | AAAG  | GGTAC | TTTGC | TATA  | AAAGCC | AGGTA | AGAA  | AGAT | CGAA | TTTGC | TA | AAGCC | TTT | AGCC | AA | TT | GT | AG | :  | 11118 |       |
| Chrysemys_picta            | :   | TAAGGG | TAAAG | CTTTTAA | TATAG | GGGAGG | AAAG  | GGTAC | TTTGC | TATA  | AAAGCC | AGGTA | AGAA  | AGAT | CGAA | TTTGC | TA | AAGCC | TTT | AGCC | AA | TT | GT | AG | :  | 11133 |       |
| Chelonia_mydas             | :   | TAAGGG | TAAAG | CTTTTAA | TATAG | GGGAGG | AAAG  | GGTAC | TTTGC | TATA  | AAAGCC | AGGTA | AGAA  | AGAT | CGAA | TTTGC | TA | AAGCC | TTT | AGCC | AA | TT | GT | AG | :  | 11133 |       |
| Tinanus_major              | :   | TCGGCC | TGAA  | CTATA   | TGCTA | GGGGGA | TGGT  | TCAT  | TTTGG | TATAT | CGG    | GGG   | AAAAG | GGGG | AGCC | TC    | TC | TC    | TC  | TC   | TC | TC | TC | TC | TC | :     | 11109 |
| Smithornis_sharpei         | :   | TCGGCC | TGAA  | CTATA   | TGCTA | GGGGGA | TGGT  | TCAT  | TTTGG | TATAT | CGG    | GGG   | AAAAG | GGGG | AGCC | TC    | TC | TC    | TC  | TC   | TC | TC | TC | TC | TC | :     | 11115 |
| Corvus_frugilegus          | :   | TCGGCC | TGAA  | CTATA   | TGCTA | GGGGGA | TGGT  | TCAT  | TTTGG | TATAT | CGG    | GGG   | AAAAG | GGGG | AGCC | TC    | TC | TC    | TC  | TC   | TC | TC | TC | TC | TC | :     | 11130 |
| Vidua_chalybeata           | :   | TCGGCC | TGAA  | CTATA   | TGCTA | GGGGGA | TGGT  | TCAT  | TTTGG | TATAT | CGG    | GGG   | AAAAG | GGGG | AGCC | TC    | TC | TC    | TC  | TC   | TC | TC | TC | TC | TC | :     | 11127 |
| Buteo_buteo                | :   | TCGGCC | TGAA  | CTATA   | TGCTA | GGGGGA | TGGT  | TCAT  | TTTGG | TATAT | CGG    | GGG   | AAAAG | GGGG | AGCC | TC    | TC | TC    | TC  | TC   | TC | TC | TC | TC | TC | :     | 11127 |
| Falco_peregrinus           | :   | TCGGCC | TGAA  | CTATA   | TGCTA | GGGGGA | TGGT  | TCAT  | TTTGG | TATAT | CGG    | GGG   | AAAAG | GGGG | AGCC | TC    | TC | TC    | TC  | TC   | TC | TC | TC | TC | TC | :     | 11130 |
| Dromaius_novaeollandiae    | :   | TCGGCC | TGAA  | CTATA   | TGCTA | GGGGGA | TGGT  | TCAT  | TTTGG | TATAT | CGG    | GGG   | AAAAG | GGGG | AGCC | TC    | TC | TC    | TC  | TC   | TC | TC | TC | TC | TC | :     | 11118 |
| Struthio_camelus           | :   | TCGGCC | TGAA  | CTATA   | TGCTA | GGGGGA | TGGT  | TCAT  | TTTGG | TATAT | CGG    | GGG   | AAAAG | GGGG | AGCC | TC    | TC | TC    | TC  | TC   | TC | TC | TC | TC | TC | :     | 11124 |
| Apteryx_haastii            | :   | TCGGCC | TGAA  | CTATA   | TGCTA | GGGGGA | TGGT  | TCAT  | TTTGG | TATAT | CGG    | GGG   | AAAAG | GGGG | AGCC | TC    | TC | TC    | TC  | TC   | TC | TC | TC | TC | TC | :     | 11109 |
| Rhea_americana             | :   | TCGGCC | TGAA  | CTATA   | TGCTA | GGGGGA | TGGT  | TCAT  | TTTGG | TATAT | CGG    | GGG   | AAAAG | GGGG | AGCC | TC    | TC | TC    | TC  | TC   | TC | TC | TC | TC | TC | :     | 11127 |
| Gallus_gallus              | :   | TCGGCC | TGAA  | CTATA   | TGCTA | GGGGGA | TGGT  | TCAT  | TTTGG | TATAT | CGG    | GGG   | AAAAG | GGGG | AGCC | TC    | TC | TC    | TC  | TC   | TC | TC | TC | TC | TC | :     | 11124 |
| Ciconia_ciconia            | :   | TCGGCC | TGAA  | CTATA   | TGCTA | GGGGGA | TGGT  | TCAT  | TTTGG | TATAT | CGG    | GGG   | AAAAG | GGGG | AGCC | TC    | TC | TC    | TC  | TC   | TC | TC | TC | TC | TC | :     | 11124 |
| Ciconia_boyciana           | :   | TCGGCC | TGAA  | CTATA   | TGCTA | GGGGGA | TGGT  | TCAT  | TTTGG | TATAT | CGG    | GGG   | AAAAG | GGGG | AGCC | TC    | TC | TC    | TC  | TC   | TC | TC | TC | TC | TC | :     | 11121 |
| Iguana_iguana              | :   | TCGGCC | TGAA  | CTATA   | TGCTA | GGGGGA | TGGT  | TCAT  | TTTGG | TATAT | CGG    | GGG   | AAAAG | GGGG | AGCC | TC    | TC | TC    | TC  | TC   | TC | TC | TC | TC | TC | :     | 11103 |
| Eumeces_egregius           | :   | TCGGCC | TGAA  | CTATA   | TGCTA | GGGGGA | TGGT  | TCAT  | TTTGG | TATAT | CGG    | GGG   | AAAAG | GGGG | AGCC | TC    | TC | TC    | TC  | TC   | TC | TC | TC | TC | TC | :     | 11112 |
| Sphenodon_punctatus        | :   | TCGGCC | TGAA  | CTATA   | TGCTA | GGGGGA | TGGT  | TCAT  | TTTGG | TATAT | CGG    | GGG   | AAAAG | GGGG | AGCC | TC    | TC | TC    | TC  | TC   | TC | TC | TC | TC | TC | :     | 9306  |
| Sceloporus_occidentalis    | :   | TCGGCC | TGAA  | CTATA   | TGCTA | GGGGGA | TGGT  | TCAT  | TTTGG | TATAT | CGG    | GGG   | AAAAG | GGGG | AGCC | TC    | TC | TC    | TC  | TC   | TC | TC | TC | TC | TC | :     | 11097 |
| Cordylus_warreni           | :   | TCGGCC | TGAA  | CTATA   | TGCTA | GGGGGA | TGGT  | TCAT  | TTTGG | TATAT | CGG    | GGG   | AAAAG | GGGG | AGCC | TC    | TC | TC    | TC  | TC   | TC | TC | TC | TC | TC | :     | 11112 |
| Abronia_graminea           | :   | TCGGCC | TGAA  | CTATA   | TGCTA | GGGGGA | TGGT  | TCAT  | TTTGG | TATAT | CGG    | GGG   | AAAAG | GGGG | AGCC | TC    | TC | TC    | TC  | TC   | TC | TC | TC | TC | TC | :     | 11121 |
| Shinisaurus_crocodilurus   | :   | TCGGCC | TGAA  | CTATA   | TGCTA | GGGGGA | TGGT  | TCAT  | TTTGG | TATAT | CGG    | GGG   | AAAAG | GGGG | AGCC | TC    | TC | TC    | TC  | TC   | TC | TC | TC | TC | TC | :     | 11082 |
| Varanus_komodoensis        | :   | TCGGCC | TGAA  | CTATA   | TGCTA | GGGGGA | TGGT  | TCAT  | TTTGG | TATAT | CGG    | GGG   | AAAAG | GGGG | AGCC | TC    | TC | TC    | TC  | TC   | TC | TC | TC | TC | TC | :     | 11133 |
| Rhineura_floridana         | :   | TCGGCC | TGAA  | CTATA   | TGCTA | GGGGGA | TGGT  | TCAT  | TTTGG | TATAT | CGG    | GGG   | AAAAG | GGGG | AGCC | TC    | TC | TC    | TC  | TC   | TC | TC | TC | TC | TC | :     | 11103 |
| Geocalamus_acutus          | :   | TCGGCC | TGAA  | CTATA   | TGCTA | GGGGGA | TGGT  | TCAT  | TTTGG | TATAT | CGG    | GGG   | AAAAG | GGGG | AGCC | TC    | TC | TC    | TC  | TC   | TC | TC | TC | TC | TC | :     | 11052 |
| Diplometopon_zarudnyi      | :   | TCGGCC | TGAA  | CTATA   | TGCTA | GGGGGA | TGGT  | TCAT  | TTTGG | TATAT | CGG    | GGG   | AAAAG | GGGG | AGCC | TC    | TC | TC    | TC  | TC   | TC | TC | TC | TC | TC | :     | 11079 |
| Amphisbaena_schmidti       | :   | TCGGCC | TGAA  | CTATA   | TGCTA | GGGGGA | TGGT  | TCAT  | TTTGG | TATAT | CGG    | GGG   | AAAAG | GGGG | AGCC | TC    | TC | TC    | TC  | TC   | TC | TC | TC | TC | TC | :     | 11058 |
| Bipes_tridactylus          | :   | TCGGCC | TGAA  | CTATA   | TGCTA | GGGGGA | TGGT  | TCAT  | TTTGG | TATAT | CGG    | GGG   | AAAAG | GGGG | AGCC | TC    | TC | TC    | TC  | TC   | TC | TC | TC | TC | TC | :     | 11052 |
| Bipes_canaliculatus        | :   | TCGGCC | TGAA  | CTATA   | TGCTA | GGGGGA | TGGT  | TCAT  | TTTGG | TATAT | CGG    | GGG   | AAAAG | GGGG | AGCC | TC    | TC | TC    | TC  | TC   | TC | TC | TC | TC | TC | :     | 11061 |
| Bipes_biporus              | :   | TCGGCC | TGAA  | CTATA   | TGCTA | GGGGGA | TGGT  | TCAT  | TTTGG | TATAT | CGG    | GGG   | AAAAG | GGGG | AGCC | TC    | TC | TC    | TC  | TC   | TC | TC | TC | TC | TC | :     | 11106 |
| Anolis_carolinensis        | :   | TCGGCC | TGAA  | CTATA   | TGCTA | GGGGGA | TGGT  | TCAT  | TTTGG | TATAT | CGG    | GGG   | AAAAG | GGGG | AGCC | TC    | TC | TC    | TC  | TC   | TC | TC | TC | TC | TC | :     | 10812 |
| Ophisaurus_attenuatus      | :   | TCGGCC | TGAA  | CTATA   | TGCTA | GGGGGA | TGGT  | TCAT  | TTTGG | TATAT | CGG    | GGG   | AAAAG | GGGG | AGCC | TC    | TC | TC    | TC  | TC   | TC | TC | TC | TC | TC | :     | 10740 |
| Varanus_salvator           | :</ |        |       |         |       |        |       |       |       |       |        |       |       |      |      |       |    |       |     |      |    |    |    |    |    |       |       |





|                            | 2240 | *     | 12260 | *     |         |      |     |       |         |         |         |         |         |         |         |         |         |
|----------------------------|------|-------|-------|-------|---------|------|-----|-------|---------|---------|---------|---------|---------|---------|---------|---------|---------|
| Bos_taurus                 | :    | ----- | ----- | ----- | : 11370 |      |     |       |         |         |         |         |         |         |         |         |         |
| Hylobates_lar              | :    | ----- | ----- | ----- | : 11367 |      |     |       |         |         |         |         |         |         |         |         |         |
| Lemur_catta                | :    | ----- | ----- | ----- | : -     |      |     |       |         |         |         |         |         |         |         |         |         |
| Nycticebus_coucang         | :    | ----- | ----- | ----- | : 11370 |      |     |       |         |         |         |         |         |         |         |         |         |
| Tarsius_bancanus           | :    | ----- | ----- | ----- | : 11349 |      |     |       |         |         |         |         |         |         |         |         |         |
| Gorilla_gorilla            | :    | ----- | ----- | ----- | : 11367 |      |     |       |         |         |         |         |         |         |         |         |         |
| Homo_sapiens               | :    | ----- | ----- | ----- | : 11358 |      |     |       |         |         |         |         |         |         |         |         |         |
| Papio_hamadryas            | :    | ----- | ----- | ----- | : 11367 |      |     |       |         |         |         |         |         |         |         |         |         |
| Cebus_albifrons            | :    | GGG   | ----- | ----- | : 11364 |      |     |       |         |         |         |         |         |         |         |         |         |
| Macaca_sylvanus            | :    | ----- | ----- | ----- | : 11367 |      |     |       |         |         |         |         |         |         |         |         |         |
| Pongo_pygmaeus             | :    | ----- | ----- | ----- | : 11367 |      |     |       |         |         |         |         |         |         |         |         |         |
| Pan_paniscus               | :    | ----- | ----- | ----- | : 11367 |      |     |       |         |         |         |         |         |         |         |         |         |
| Agkistrodon_piscivorus     | :    | AGG   | GGGG  | GGG   | CCG     | CC   | TT  | ----- | : 11265 |         |         |         |         |         |         |         |         |
| Pantherophis_guttatus      | :    | CCGG  | GGG   | GG    | TT      | CG   | CCG | ----- | : 11235 |         |         |         |         |         |         |         |         |
| Dinodon_semicarinatus      | :    | CCG   | GGG   | GG    | TT      | GG   | CC  | TT    | -----   | : 11241 |         |         |         |         |         |         |         |
| Boa_constrictor            | :    | CCG   | GG    | GG    | GG      | TT   | GG  | AA    | TT      | -----   | : 11292 |         |         |         |         |         |         |
| Python_regius              | :    | CCGG  | AGG   | GGG   | TT      | GG   | AA  | CC    | TT      | -----   | : 11298 |         |         |         |         |         |         |
| Acrochordus_granulatus     | :    | AAG   | GG    | CG    | AA      | AA   | TT  | GG    | AA      | TT      | -----   | : 11280 |         |         |         |         |         |
| Cylindrophis_ruffus        | :    | CCG   | GGGG  | GGG   | TT      | GG   | CC  | AA    | TT      | -----   | : 11265 |         |         |         |         |         |         |
| Ovophis_okinavensis        | :    | CCG   | TT    | GG    | GG      | TT   | GG  | CC    | TT      | -----   | : 11262 |         |         |         |         |         |         |
| Xenopeltis_unicolor        | :    | CCG   | GGGG  | GGG   | TT      | GG   | CC  | AA    | TT      | -----   | : 11304 |         |         |         |         |         |         |
| Typhlops_reticulatus       | :    | GA    | CG    | AA    | GG      | GGGG | TT  | AA    | GG      | CG      | AA      | -----   | : 11274 |         |         |         |         |
| Leptotyphlops_dulcis       | :    | GG    | TT    | GG    | GGG     | GG   | TT  | GG    | CG      | GG      | TT      | -----   | : 11257 |         |         |         |         |
| Caiman_crocodylus          | :    | TT    | CG    | GGGG  | GG      | TT   | CG  | CG    | TT      | CG      | TT      | -----   | : 11376 |         |         |         |         |
| Alligator_sinensis         | :    | CCGG  | CG    | GGG   | GG      | TT   | CG  | CG    | TT      | CG      | TT      | -----   | : 11418 |         |         |         |         |
| Alligator_mississippiensis | :    | CCG   | TT    | AGGG  | GG      | TT   | CG  | CG    | TT      | CG      | TT      | -----   | : 11367 |         |         |         |         |
| Gavialis_gangeticus        | :    | CCG   | CG    | GGG   | GG      | TT   | CG  | CG    | TT      | CG      | TT      | -----   | : 11443 |         |         |         |         |
| Crocodylus_moreletii       | :    | CCG   | CG    | GGG   | GG      | TT   | CG  | CG    | TT      | CG      | TT      | -----   | : 11419 |         |         |         |         |
| Dogania_subplana           | :    | AG    | TT    | GG    | GG      | TT   | GG  | TT    | CG      | AA      | TT      | -----   | : 11295 |         |         |         |         |
| Pelomedusa_subrufa         | :    | GG    | TT    | GGG   | AA      | GG   | TT  | CG    | AA      | CG      | AA      | TT      | -----   | : 11358 |         |         |         |
| Chrysemys_picta            | :    | AG    | TT    | GG    | GGG     | AA   | GG  | TT    | CG      | AA      | CG      | AA      | TT      | -----   | : 11373 |         |         |
| Chelonia_mydas             | :    | GG    | CG    | GG    | GG      | AA   | GG  | TT    | CG      | AA      | CG      | AA      | TT      | -----   | : 11373 |         |         |
| Tinamus_major              | :    | GG    | CG    | GGG   | GG      | AA   | GG  | TT    | CG      | AA      | CG      | AA      | TT      | -----   | : 11346 |         |         |
| Smithornis_sharpei         | :    | AG    | CG    | CG    | CG      | AA   | GG  | TT    | CG      | AA      | CG      | AA      | TT      | -----   | : 11352 |         |         |
| Corvus_frugilegus          | :    | AG    | CG    | GGG   | GG      | AA   | GG  | TT    | CG      | AA      | CG      | AA      | TT      | -----   | : 11367 |         |         |
| Vidua_chalybeata           | :    | GG    | CG    | GGG   | GG      | AA   | GG  | TT    | CG      | AA      | CG      | AA      | TT      | -----   | : 11361 |         |         |
| Buteo_buteo                | :    | GG    | CG    | GGG   | GG      | AA   | GG  | TT    | CG      | AA      | CG      | AA      | TT      | -----   | : 11361 |         |         |
| Falco_peregrinus           | :    | GG    | CG    | GGG   | GG      | AA   | GG  | TT    | CG      | AA      | CG      | AA      | TT      | -----   | : 11367 |         |         |
| Dromaius_novaeollandiae    | :    | AG    | CG    | GGGG  | GG      | AA   | GG  | TT    | CG      | AA      | CG      | AA      | TT      | -----   | : 11355 |         |         |
| Struthio_camelus           | :    | AG    | CG    | GGGG  | GG      | AA   | GG  | TT    | CG      | AA      | CG      | AA      | TT      | -----   | : 11361 |         |         |
| Apteryx_haastii            | :    | AG    | CG    | GGGG  | GG      | AA   | GG  | TT    | CG      | AA      | CG      | AA      | TT      | -----   | : 11346 |         |         |
| Rhea_americana             | :    | AG    | CG    | GGGG  | GG      | AA   | GG  | TT    | CG      | AA      | CG      | AA      | TT      | -----   | : 11364 |         |         |
| Gallus_gallus              | :    | GG    | CG    | GGGG  | GG      | AA   | GG  | TT    | CG      | AA      | CG      | AA      | TT      | -----   | : 11361 |         |         |
| Ciconia_ciconia            | :    | AG    | CG    | GGG   | GG      | AA   | GG  | TT    | CG      | AA      | CG      | AA      | TT      | -----   | : 11361 |         |         |
| Ciconia_boyciana           | :    | AG    | CG    | GGG   | GG      | AA   | GG  | TT    | CG      | AA      | CG      | AA      | TT      | -----   | : 11358 |         |         |
| Iguana_iguana              | :    | GG    | CG    | GG    | GGG     | GG   | TT  | CG    | AA      | CG      | AA      | TT      | -----   | : 11343 |         |         |         |
| Eumeces_egregius           | :    | GG    | CG    | CG    | GGG     | GG   | TT  | CG    | AA      | CG      | AA      | TT      | -----   | : 11352 |         |         |         |
| Sphenodon_punctatus        | :    | GG    | CG    | CG    | GG      | GG   | TT  | CG    | AA      | CG      | AA      | TT      | -----   | : 9546  |         |         |         |
| Sceloporus_occidentalis    | :    | AG    | CG    | GG    | GG      | AA   | GG  | TT    | CG      | AA      | CG      | AA      | TT      | -----   | : 11334 |         |         |
| Cordylus_warreni           | :    | CC    | GG    | GG    | GGG     | GG   | TT  | CG    | AA      | CG      | AA      | TT      | -----   | : 11346 |         |         |         |
| Abronia_graminea           | :    | CC    | GA    | CG    | GG      | AA   | CG  | GG    | TT      | CG      | AA      | CG      | AA      | TT      | -----   | : 11352 |         |
| Shinisaurus_crocodylurus   | :    | TT    | CG    | CG    | GG      | GG   | TT  | CG    | AA      | CG      | AA      | TT      | -----   | : 11322 |         |         |         |
| Varanus_komodoensis        | :    | GG    | CG    | CG    | GG      | GG   | TT  | CG    | AA      | CG      | AA      | TT      | -----   | : 11379 |         |         |         |
| Rhineura_floridana         | :    | CG    | CG    | CG    | GG      | GG   | GG  | GG    | GG      | GG      | GG      | GG      | GG      | GG      | GG      | -----   | : 11331 |
| Geocalamus_acutus          | :    | AG    | CG    | GG    | GGG     | GG   | AA  | GG    | TT      | CG      | AA      | CG      | AA      | TT      | -----   | : 11304 |         |
| Diplometopon_zarudnyi      | :    | AG    | GG    | GGGG  | GG      | AA   | GG  | GG    | GG      | GG      | GG      | GG      | GG      | GG      | GG      | -----   | : 11334 |
| Amphisbaena_schmidti       | :    | CCGG  | CG    | GGG   | GG      | TT   | CG  | AA    | CG      | AA      | CG      | AA      | TT      | -----   | : 11313 |         |         |
| Bipes_tridactylus          | :    | GG    | AA    | GGGG  | GG      | AA   | GG  | GG    | AA      | GG      | GG      | AA      | GG      | GG      | AA      | -----   | : 11277 |
| Bipes_canaliculatus        | :    | AA    | CG    | CG    | GGG     | GG   | AA  | GG    | GG      | AA      | GG      | GG      | AA      | GG      | GG      | -----   | : 11292 |
| Bipes_biporus              | :    | AG    | GA    | CG    | GG      | GG   | TT  | CG    | AA      | CG      | AA      | CG      | AA      | TT      | -----   | : 11340 |         |
| Anolis_carolinensis        | :    | GG    | CG    | GG    | GG      | AA   | GG  | GG    | AA      | GG      | GG      | AA      | GG      | GG      | AA      | -----   | : 11052 |
| Ophisaurus_atnuatus        | :    | AA    | TT    | CG    | GG      | GG   | CG  | AA    | GG      | CG      | AA      | GG      | CG      | AA      | GG      | -----   | : 10977 |
| Varanus_salvator           | :    | GG    | CG    | GGG   | GG      | AA   | GG  | GG    | AA      | GG      | GG      | AA      | GG      | GG      | AA      | -----   | : 11361 |
| Mertensiella_luschani      | :    | GG    | CG    | GG    | GG      | AA   | GG  | GG    | AA      | GG      | GG      | AA      | GG      | GG      | AA      | -----   | : 11358 |
| Xenopus_laevis             | :    | AA    | AA    | GG    | GG      | GG   | GG  | GG    | GG      | GG      | GG      | GG      | GG      | GG      | GG      | -----   | : 11346 |
