# Supplementary material for: Adaptive Evolution and Functional Redesign of Core Metabolic Proteins in Snakes
Source: PubMed Central journal article supplement (PMC2376058; doi:10.1371/journal.pone.0002201), 2008-05-21
Supplement: pone.0002201.s019.pdf [file pone.0002201.s019.pdf]

**Supplementary Table S1.1.** Species for which mitochondrial genomes were sequenced in this study, with specimen voucher information.

| Species                      | Specimen ID   |
|------------------------------|---------------|
| <i>Typhlops reticulatus</i>  | LSUMZ H-20102 |
| <i>Anolis carolinensis</i>   | CCA 8051      |
| <i>Ophisaurus attenuatus</i> | LSUMZ H-15928 |
| <i>Varanus salvator</i>      | CCA 8037      |

LSUMZ = Louisiana State University Museum of Natural Science

CCA = Louisiana State University Museum of Natural Science - *Not Yet Cataloged*

**Supplementary Table S1.2.** Degenerate primers used for amplification of short fragments.

|                | Fragment         | Forward Primer                 | Reverse Primer             |
|----------------|------------------|--------------------------------|----------------------------|
| <b>Snakes</b>  | 500 bp of 16sRNA | AACCCYYGTACCTYTTGCATCATG       | CCGGTCTGAACTCAGATCACGT     |
|                | 500 bp of COIII  | GAAGCMGCWGCCTGATACTGACA        | GGGTCRAAKCCRCATTTCRTA      |
| <b>Lizards</b> | 500 bp of 12sRNA | AAACAACTAGGATTAGATACCCTACTATGC | GAGGGTGACGGGCGGTGTGTGCG    |
|                | 500 bp of COIII  | CCAYATAGTMGACCCRAGCCC          | GGKGCTTCGTARTATTCTATDGTCTG |

**Supplementary Table S1.3.** Species-specific primers used for long PCRs to amplify the mitochondrial genome in two overlapping fragments.

|                              | Species                     | Length                     | Forward Primer              | Reverse Primer                   |
|------------------------------|-----------------------------|----------------------------|-----------------------------|----------------------------------|
| <b>Snakes</b>                | <i>Python regius</i>        | 9kb                        | CCTCGATGTTGGATCAGGACACCC    | CCTGGGGGGACCAAGTGC               |
|                              |                             | 8kb                        | TTCCAAGCACTTGGTCCCCC        | GGGTGTCCTGATCCAACATCGAGG         |
| <b>Lizards</b>               | <i>Typhlops reticulatus</i> | 9kb                        | CCTCGATGTTGGATCAGGACACCC    | GTGGAGCTTTCTGCTTGAAAGGC          |
|                              |                             | 8kb                        | CCAAGCAGAAAGTCCACCAAAGG     | GGGTGTCCTGATCCAACATCGAGG         |
|                              | <i>Anolis carolinensis</i>  | 9kb                        | GCCTAGCCATTAAGTACACCC       | GGGCTCATGTTACGGTAACGC            |
|                              |                             | 8kb                        | TGTACAAAAGGGCCTGCGATATGGG   | GGTGTGTCAGTTAATGGCTAGGCATAGTAGGG |
| <i>Ophisaurus attenuatus</i> | 9kb                         | CGCCCAACACAGCCTATATACCGCCG | CGGAGACCTGTTGGACGGGTGGGG    |                                  |
|                              | 8kb                         | ACCCGTCCAAACAGGTCTCCG      | GCGGTATATAGGCTGTGTTGGGCG    |                                  |
| <i>Varanus salvator</i>      | 9kb                         | CCCGACCACTACTAGCACCCC      | GGAGTGGGACTTCGAATGGGTTAATGG |                                  |
|                              | 8kb                         | TTCTTCTCCTGGGATTCTTCTGAGCC | GGGGTGCTAGTAGTGGTCGGG       |                                  |
