# Supplementary material for: Adaptive Evolution and Functional Redesign of Core Metabolic Proteins in Snakes
Source: PubMed Central journal article supplement (PMC2376058; doi:10.1371/journal.pone.0002201), 2008-05-21
Supplement: pone.0002201.s021.pdf [file pone.0002201.s021.pdf]

**Supplementary Table S3.** Sites that have undergone positive selection in COI along the branches leading to all snakes and that leading to the Alethinophidia, based on the branch-site model of PAML. The probability of a site being under positive selection ( $dN/dS > 1$ ) is based on the posterior probabilities from Bayes empirical Bayes support estimated in PAML. Only sites with posterior probabilities  $> 90\%$  are shown. The reference to sites refers to amino acid sites of the cow COI protein.

| Site | Branch |                |
|------|--------|----------------|
|      | Snakes | Alethinophidia |
| 32   |        | 0.96           |
| 35   |        | 0.90           |
| 42   |        | 0.96           |
| 42   | 0.93   |                |
| 50   |        | 0.93           |
| 54   |        | 0.90           |
| 57   |        | 0.93           |
| 73   | 0.92   |                |
| 114  |        | 0.92           |
| 141  |        | 0.90           |
| 178  |        | 0.99           |
| 197  | 0.92   |                |
| 223  |        | 0.95           |
| 256  |        | 1.00           |
| 266  |        | 1.00           |
| 299  |        | 0.92           |
| 301  |        | 0.92           |
| 307  |        | 0.91           |
| 322  |        | 0.91           |
| 328  | 0.98   | 1.00           |
| 335  |        | 0.98           |
| 339  |        | 1.00           |
| 434  |        | 0.91           |
| 443  |        | 0.91           |
| 459  |        | 0.93           |
| 463  | 0.99   |                |
| 472  |        | 0.98           |
| 478  |        | 0.95           |
| 481  | 0.98   |                |
| 486  |        | 0.98           |
| 487  |        | 1.00           |
| 491  |        | 0.92           |
| 505  | 0.93   |                |
