# Supplementary material for: Adaptive Evolution and Functional Redesign of Core Metabolic Proteins in Snakes
Source: PubMed Central journal article supplement (PMC2376058; doi:10.1371/journal.pone.0002201), 2008-05-21
Supplement: pone.0002201.s025.pdf [file pone.0002201.s025.pdf]

**Supplementary Table S7.** Conservation of residues in proton transfer channel K across the 65 taxon dataset used. The symbol “-” refers to amino acids that are the same as the sequence of *Bos taurus* at the corresponding site.

|                               |                                   | Channel K                      |     |     |     |     |     |     |     |     |     |     |     |   |
|-------------------------------|-----------------------------------|--------------------------------|-----|-----|-----|-----|-----|-----|-----|-----|-----|-----|-----|---|
|                               |                                   | 240                            | 244 | 255 | 256 | 265 | 291 | 316 | 319 | 368 | 489 | 490 | 491 |   |
| <b>Primates</b>               | <i>Bos taurus</i>                 | H                              | Y   | S   | H   | K   | H   | T   | K   | H   | T   | T   | N   |   |
|                               | <i>Hylobates lar</i>              | -                              | -   | -   | -   | -   | -   | -   | -   | -   | S   | -   | -   |   |
|                               | <i>Lemur catta</i>                | -                              | -   | -   | -   | -   | -   | -   | -   | -   | P   | -   | -   |   |
|                               | <i>Nycticebus coucang</i>         | -                              | -   | -   | -   | -   | -   | -   | -   | -   | H   | -   | -   |   |
|                               | <i>Tarsius bancanus</i>           | -                              | -   | -   | -   | -   | -   | -   | -   | -   | -   | -   | -   |   |
|                               | <i>Gorilla gorilla</i>            | -                              | -   | -   | -   | -   | -   | -   | -   | -   | S   | -   | -   |   |
|                               | <i>Homo sapiens</i>               | -                              | -   | -   | -   | -   | -   | -   | -   | -   | S   | M   | -   |   |
|                               | <i>Papio hamadryas</i>            | -                              | -   | -   | -   | -   | -   | -   | -   | -   | S   | -   | S   |   |
|                               | <i>Cebus albifrons</i>            | -                              | -   | -   | -   | -   | -   | -   | -   | -   | S   | -   | -   |   |
|                               | <i>Macaca sylvanus</i>            | -                              | -   | -   | -   | -   | -   | -   | -   | -   | L   | -   | -   |   |
|                               | <i>Pongo pygmaeus</i>             | -                              | -   | -   | -   | -   | -   | -   | -   | -   | S   | -   | S   |   |
|                               | <i>Pan paniscus</i>               | -                              | -   | -   | -   | -   | -   | -   | -   | -   | S   | A   | -   |   |
|                               | <b>Snakes</b>                     | <i>Agkistrodon piscivorus</i>  | -   | -   | -   | S   | -   | -   | -   | -   | -   | K   | -   | H |
|                               |                                   | <i>Pantherophis slowinskii</i> | -   | -   | -   | S   | -   | -   | -   | -   | -   | K   | -   | H |
| <i>Dinodon semicarinatus</i>  |                                   | -                              | -   | -   | S   | -   | -   | -   | -   | -   | K   | -   | H   |   |
| <i>Boa constrictor</i>        |                                   | -                              | -   | -   | S   | -   | -   | -   | -   | -   | K   | -   | H   |   |
| <i>Python regius</i>          |                                   | -                              | -   | -   | S   | -   | -   | -   | -   | -   | K   | -   | H   |   |
| <i>Acrochordus granulatus</i> |                                   | -                              | -   | -   | S   | -   | -   | -   | -   | -   | K   | I   | H   |   |
| <i>Cylindrophis ruffus</i>    |                                   | -                              | -   | -   | S   | -   | -   | -   | -   | -   | K   | -   | H   |   |
| <i>Ovophis okinavensis</i>    |                                   | -                              | -   | -   | S   | -   | -   | -   | -   | -   | K   | -   | H   |   |
| <i>Xenopeltis unicolor</i>    |                                   | -                              | -   | -   | S   | -   | -   | -   | -   | -   | K   | -   | H   |   |
| <i>Typhlops reticulatus</i>   |                                   | -                              | -   | -   | -   | -   | -   | -   | -   | -   | K   | -   | D   |   |
| <i>Leptotyphlops dulcis</i>   |                                   | -                              | -   | -   | -   | -   | -   | -   | -   | -   | K   | -   | S   |   |
| <b>Lizards</b>                |                                   | <i>Iguana iguana</i>           | -   | -   | -   | -   | -   | -   | -   | -   | -   | -   | -   | - |
|                               |                                   | <i>Eumeces egregius</i>        | -   | -   | -   | -   | -   | -   | -   | -   | -   | S   | -   | - |
|                               |                                   | <i>Sceloporus occidentalis</i> | -   | -   | -   | -   | -   | -   | -   | -   | -   | -   | -   | - |
|                               | <i>Cordylus warreni</i>           | -                              | -   | -   | -   | -   | -   | -   | -   | -   | -   | -   | -   |   |
|                               | <i>Abronia graminea</i>           | -                              | -   | -   | -   | -   | -   | -   | -   | -   | H   | -   | -   |   |
|                               | <i>Shinisaurus crocodilurus</i>   | -                              | -   | -   | -   | -   | -   | -   | -   | -   | N   | -   | -   |   |
|                               | <i>Varanus komodoensis</i>        | -                              | -   | -   | -   | -   | -   | -   | -   | -   | E   | A   | -   |   |
|                               | <i>Rhineura floridana</i>         | -                              | -   | -   | -   | -   | -   | -   | -   | -   | H   | K   | G   |   |
|                               | <i>Geocalamus acutus</i>          | -                              | -   | -   | -   | -   | -   | -   | -   | -   | M   | -   | -   |   |
|                               | <i>Diplometopon zarudnyi</i>      | -                              | -   | -   | -   | -   | -   | -   | -   | -   | A   | -   | -   |   |
|                               | <i>Amphisbaena schmidti</i>       | -                              | -   | -   | -   | -   | -   | -   | -   | -   | S   | -   | -   |   |
|                               | <i>Bipes tridactylus</i>          | -                              | -   | -   | -   | -   | -   | -   | -   | -   | -   | -   | -   |   |
|                               | <i>Bipes canaliculatus</i>        | -                              | -   | -   | -   | -   | -   | -   | -   | -   | M   | -   | -   |   |
|                               | <i>Bipes biporus</i>              | -                              | -   | -   | -   | -   | -   | -   | -   | -   | -   | -   | -   |   |
| <i>Anolis carolinensis</i>    | -                                 | -                              | -   | -   | -   | -   | -   | -   | -   | S   | -   | -   |     |   |
| <i>Ophisaurus attenuatus</i>  | -                                 | -                              | -   | -   | -   | -   | -   | -   | -   | H   | -   | -   |     |   |
| <i>Varanus salvator</i>       | -                                 | -                              | -   | -   | -   | -   | -   | -   | -   | E   | M   | -   |     |   |
| <b>Tuatara</b>                | <i>Sphenodon punctatus</i>        | -                              | -   | -   | -   | -   | -   | -   | -   | -   | F   | -   | G   |   |
| <b>Crocodylians</b>           | <i>Caiman crocodilus</i>          | -                              | -   | -   | -   | -   | -   | -   | -   | -   | I   | -   | -   |   |
|                               | <i>Alligator sinensis</i>         | -                              | -   | -   | -   | -   | -   | -   | -   | -   | -   | -   | -   |   |
|                               | <i>Alligator mississippiensis</i> | -                              | -   | -   | -   | -   | -   | -   | -   | -   | M   | -   | -   |   |
|                               | <i>Gavialis gangeticus</i>        | -                              | -   | -   | -   | -   | -   | -   | -   | -   | -   | -   | -   |   |
| <i>Crocodylus moreletii</i>   | -                                 | -                              | -   | -   | -   | -   | -   | -   | -   | S   | -   | -   |     |   |
| <b>Turtles</b>                | <i>Dogania subplana</i>           | -                              | -   | -   | -   | -   | -   | -   | -   | -   | -   | -   | -   |   |
|                               | <i>Pelomedusa subrufa</i>         | -                              | -   | -   | -   | -   | -   | -   | -   | -   | S   | -   | -   |   |
|                               | <i>Chrysemys picta</i>            | -                              | -   | -   | -   | -   | -   | -   | -   | -   | -   | -   | -   |   |
| <b>Birds</b>                  | <i>Chelonia mydas</i>             | -                              | -   | -   | -   | -   | -   | -   | -   | -   | -   | -   | -   |   |
|                               | <i>Tinamus major</i>              | -                              | -   | -   | -   | -   | -   | -   | -   | -   | S   | -   | -   |   |
|                               | <i>Smithornis sharpei</i>         | -                              | -   | -   | -   | -   | -   | -   | -   | -   | N   | -   | -   |   |
|                               | <i>Corvus frugilegus</i>          | -                              | -   | -   | -   | -   | -   | -   | -   | -   | S   | -   | -   |   |
|                               | <i>Vidua chalybeata</i>           | -                              | -   | -   | -   | -   | -   | -   | -   | -   | S   | -   | -   |   |
|                               | <i>Buteo buteo</i>                | -                              | -   | -   | -   | -   | -   | -   | -   | -   | -   | -   | -   |   |
|                               | <i>Falco peregrinus</i>           | -                              | -   | -   | -   | -   | -   | -   | -   | -   | S   | -   | -   |   |
|                               | <i>Dromaius novaehollandiae</i>   | -                              | -   | -   | -   | -   | -   | -   | -   | -   | P   | -   | -   |   |
|                               | <i>Struthio camelus</i>           | -                              | -   | -   | -   | -   | -   | -   | -   | -   | A   | -   | -   |   |
|                               | <i>Apteryx haastii</i>            | -                              | -   | -   | -   | -   | -   | -   | -   | -   | -   | -   | -   |   |
|                               | <i>Rhea americana</i>             | -                              | -   | -   | -   | -   | -   | -   | -   | -   | -   | -   | -   |   |
|                               | <i>Gallus gallus</i>              | -                              | -   | -   | -   | -   | -   | -   | -   | -   | A   | -   | -   |   |
|                               | <i>Ciconia ciconia</i>            | -                              | -   | -   | -   | -   | -   | -   | -   | -   | P   | -   | -   |   |
|                               | <i>Ciconia boyciana</i>           | -                              | -   | -   | -   | -   | -   | -   | -   | -   | P   | -   | -   |   |
| <b>Amphibians</b>             | <i>Mertensiella luschani</i>      | -                              | -   | -   | -   | -   | -   | -   | -   | -   | S   | -   | -   |   |
|                               | <i>Xenopus laevis</i>             | -                              | -   | -   | -   | -   | -   | -   | -   | -   | S   | -   | M   |   |
