# Supplementary material for: Adaptive Evolution and Functional Redesign of Core Metabolic Proteins in Snakes
Source: PubMed Central journal article supplement (PMC2376058; doi:10.1371/journal.pone.0002201), 2008-05-21
Supplement: pone.0002201.s026.pdf [file pone.0002201.s026.pdf]

**Supplementary Table S8.** Conservation of residues surrounding channel D across the 65 taxon dataset used. The symbol “-” refers to amino acids that are the same as the reference sequence of *Bos taurus* at the corresponding site.

|                    |                         | 10 | 13 | 14 | 15 | 16 | 17 | 18 | 80 | 81 | 84 | 85 | 90 | 92 | 97 | 99 | 100 | 102 | 107 | 109 | 111 | 114 | 116 | 141 | 143 | 145 | 147 | 148 | 150 | 155 | 158 | 502 | 504 |   |   |
|--------------------|-------------------------|----|----|----|----|----|----|----|----|----|----|----|----|----|----|----|-----|-----|-----|-----|-----|-----|-----|-----|-----|-----|-----|-----|-----|-----|-----|-----|-----|---|---|
| <b>Primates</b>    | <i>B. taurus</i>        | T  | K  | D  | I  | G  | T  | L  | N  | W  | P  | L  | P  | M  | M  | N  | M   | F   | P   | F   | L   | A   | S   | A   | V   | L   | I   | F   | L   | V   | I   | Y   | T   |   |   |
|                    | <i>H. lar</i>           | -  | -  | -  | -  | -  | -  | -  | -  | -  | -  | -  | -  | -  | -  | -  | -   | -   | -   | -   | -   | -   | A   | -   | -   | -   | -   | -   | -   | -   | -   | -   | -   |   |   |
|                    | <i>L. catta</i>         | -  | -  | -  | -  | -  | -  | -  | -  | -  | -  | -  | -  | -  | -  | -  | -   | -   | -   | -   | -   | -   | -   | -   | -   | -   | -   | -   | -   | -   | -   | -   | -   | - |   |
|                    | <i>N. coucang</i>       | -  | -  | -  | -  | -  | -  | -  | -  | -  | -  | -  | -  | -  | -  | -  | -   | -   | -   | -   | -   | -   | -   | -   | -   | -   | -   | -   | -   | -   | -   | -   | -   | - |   |
|                    | <i>T. bancanus</i>      | -  | -  | -  | -  | -  | -  | -  | -  | -  | -  | -  | -  | -  | -  | -  | -   | -   | -   | -   | -   | -   | -   | -   | -   | -   | -   | -   | -   | -   | -   | -   | -   | - |   |
|                    | <i>G. gorilla</i>       | -  | -  | -  | -  | -  | -  | -  | -  | -  | -  | -  | -  | -  | -  | -  | -   | -   | -   | -   | -   | -   | A   | -   | -   | -   | -   | -   | -   | I   | -   | -   | -   | - |   |
|                    | <i>H. sapiens</i>       | -  | -  | -  | -  | -  | -  | -  | -  | -  | -  | -  | -  | -  | -  | -  | -   | -   | -   | L   | -   | -   | A   | -   | -   | -   | -   | -   | -   | -   | -   | -   | -   | - |   |
|                    | <i>P. hamadryas</i>     | -  | -  | -  | -  | -  | -  | -  | -  | -  | -  | -  | -  | -  | -  | L  | -   | -   | -   | -   | -   | -   | T   | -   | -   | -   | -   | -   | -   | I   | -   | H   | -   | - |   |
|                    | <i>C. albifrons</i>     | -  | -  | -  | -  | -  | -  | -  | -  | -  | -  | -  | -  | -  | -  | -  | -   | -   | -   | -   | L   | -   | -   | -   | -   | -   | -   | -   | -   | -   | I   | -   | -   | - | - |
|                    | <i>M. sylvanus</i>      | -  | -  | -  | -  | -  | -  | -  | -  | -  | -  | -  | -  | -  | -  | L  | -   | -   | -   | -   | -   | -   | T   | -   | -   | -   | -   | -   | -   | I   | -   | -   | -   | - | - |
|                    | <i>P. pygmaeus</i>      | -  | -  | -  | -  | -  | -  | -  | -  | -  | -  | -  | -  | -  | -  | -  | -   | -   | -   | -   | -   | -   | A   | -   | -   | -   | -   | -   | -   | I   | -   | -   | -   | - | - |
| <i>P. paniscus</i> | -                       | -  | -  | -  | -  | -  | -  | -  | -  | -  | -  | -  | -  | -  | -  | -  | -   | -   | -   | L   | -   | A   | -   | -   | -   | -   | -   | -   | -   | -   | -   | -   | -   | - |   |
| <b>Snakes</b>      | <i>A. piscivorus</i>    | -  | -  | -  | -  | -  | -  | -  | -  | -  | -  | -  | -  | -  | -  | -  | -   | -   | -   | L   | -   | S   | -   | P   | -   | -   | -   | -   | -   | A   | -   | -   | -   | - |   |
|                    | <i>P. slowinskii</i>    | -  | -  | -  | -  | -  | -  | -  | -  | -  | -  | -  | -  | -  | -  | -  | -   | -   | -   | L   | -   | S   | -   | P   | -   | -   | -   | -   | -   | A   | -   | -   | -   | - |   |
|                    | <i>D. semicarinatus</i> | -  | -  | -  | -  | -  | -  | -  | -  | -  | -  | -  | -  | -  | -  | -  | -   | -   | -   | L   | -   | S   | -   | P   | -   | -   | -   | -   | -   | A   | -   | -   | -   | - |   |
|                    | <i>B. constrictor</i>   | -  | -  | -  | -  | -  | -  | -  | -  | -  | -  | -  | -  | -  | -  | -  | -   | -   | -   | L   | -   | S   | -   | P   | -   | -   | -   | -   | -   | A   | -   | H   | -   | - |   |
|                    | <i>P. regius</i>        | -  | -  | -  | -  | -  | -  | -  | -  | -  | -  | -  | -  | -  | -  | -  | -   | -   | -   | L   | -   | S   | -   | P   | -   | -   | -   | -   | -   | A   | -   | H   | -   | - |   |
|                    | <i>A. granulatus</i>    | -  | -  | -  | -  | -  | -  | -  | -  | -  | -  | -  | -  | -  | -  | -  | -   | -   | -   | L   | -   | S   | -   | P   | -   | -   | -   | -   | -   | A   | -   | H   | -   | - |   |
|                    | <i>C. ruffus</i>        | -  | -  | -  | -  | -  | -  | -  | -  | -  | -  | -  | -  | -  | -  | -  | -   | -   | -   | L   | -   | S   | -   | P   | -   | -   | -   | -   | -   | A   | -   | -   | -   | - |   |
|                    | <i>O. okinavensis</i>   | -  | -  | -  | -  | -  | -  | -  | -  | -  | -  | -  | -  | -  | -  | -  | -   | -   | -   | L   | -   | S   | -   | P   | -   | -   | -   | -   | -   | A   | -   | H   | -   | - |   |
|                    | <i>X. unicolor</i>      | -  | -  | -  | -  | -  | -  | -  | -  | -  | -  | -  | -  | -  | -  | -  | -   | -   | -   | L   | -   | S   | -   | P   | -   | -   | -   | -   | -   | A   | -   | -   | -   | - |   |
|                    | <i>T. reticulatus</i>   | -  | -  | -  | -  | -  | -  | -  | -  | -  | -  | -  | -  | -  | -  | -  | -   | -   | -   | L   | -   | -   | -   | -   | -   | -   | -   | -   | -   | M   | -   | T   | T   | - |   |
|                    | <i>L. dulcis</i>        | -  | -  | -  | -  | -  | -  | -  | -  | -  | -  | -  | -  | -  | -  | -  | -   | -   | -   | L   | -   | T   | -   | T   | -   | -   | -   | -   | -   | -   | -   | H   | -   | - |   |
| <b>Lizards</b>     | <i>I. iguana</i>        | -  | -  | -  | -  | -  | -  | -  | -  | -  | -  | -  | -  | -  | -  | -  | -   | -   | -   | -   | -   | -   | -   | -   | -   | -   | -   | -   | I   | -   | -   | -   | -   |   |   |
|                    | <i>E. egregius</i>      | -  | -  | -  | -  | -  | -  | -  | -  | -  | -  | -  | -  | -  | -  | -  | -   | -   | -   | -   | -   | -   | -   | -   | -   | -   | -   | -   | -   | -   | -   | -   | -   | - |   |
|                    | <i>S. occidentalis</i>  | -  | -  | -  | -  | -  | -  | -  | -  | -  | -  | -  | -  | -  | -  | -  | -   | -   | -   | -   | -   | -   | -   | -   | -   | -   | -   | -   | -   | -   | -   | -   | -   | - |   |
|                    | <i>C. warreni</i>       | -  | -  | -  | -  | -  | -  | -  | -  | -  | -  | -  | -  | -  | -  | -  | -   | -   | -   | L   | -   | -   | -   | -   | -   | -   | -   | -   | -   | -   | -   | F   | -   | - |   |
|                    | <i>A. graminea</i>      | -  | -  | -  | -  | -  | -  | -  | -  | -  | -  | -  | -  | -  | -  | -  | -   | -   | -   | L   | -   | -   | -   | -   | -   | -   | -   | -   | -   | I   | -   | N   | -   | - |   |
|                    | <i>S. crocodilurus</i>  | -  | -  | -  | -  | -  | -  | -  | -  | -  | -  | -  | -  | -  | -  | -  | -   | -   | -   | L   | -   | -   | -   | -   | -   | -   | -   | -   | -   | -   | -   | F   | -   | - |   |
|                    | <i>V. komodoensis</i>   | -  | -  | -  | -  | -  | -  | -  | -  | -  | -  | -  | -  | -  | -  | -  | -   | -   | -   | L   | -   | -   | A   | -   | -   | -   | -   | -   | -   | -   | -   | F   | -   | - |   |
|                    | <i>R. floridana</i>     | -  | -  | -  | -  | -  | -  | -  | -  | -  | -  | -  | -  | -  | -  | -  | -   | -   | -   | L   | -   | S   | A   | P   | -   | -   | -   | -   | -   | -   | -   | -   | -   | - |   |
|                    | <i>G. acutus</i>        | -  | -  | -  | -  | -  | -  | -  | -  | -  | -  | -  | -  | -  | -  | -  | -   | -   | -   | L   | -   | -   | A   | -   | -   | -   | -   | -   | -   | -   | -   | H   | -   | - |   |
|                    | <i>D. zarudnyi</i>      | -  | -  | -  | -  | -  | -  | -  | -  | -  | -  | -  | -  | -  | -  | -  | -   | -   | -   | L   | -   | -   | A   | P   | -   | -   | -   | -   | -   | -   | -   | -   | -   | - |   |
|                    | <i>A. schmidtii</i>     | -  | -  | -  | -  | -  | -  | -  | -  | -  | -  | -  | -  | -  | -  | -  | -   | -   | -   | L   | -   | -   | A   | -   | -   | -   | -   | -   | -   | -   | -   | -   | -   | - |   |
|                    | <i>B. tridactylus</i>   | -  | -  | -  | -  | -  | -  | -  | -  | -  | -  | -  | -  | -  | -  | -  | -   | -   | -   | L   | -   | -   | A   | P   | -   | -   | -   | -   | -   | -   | -   | H   | -   | - |   |
|                    | <i>B. canaliculatus</i> | -  | -  | -  | -  | -  | -  | -  | -  | -  | -  | -  | -  | -  | -  | -  | -   | -   | -   | L   | -   | -   | A   | P   | -   | -   | -   | -   | -   | -   | -   | H   | -   | - |   |
|                    | <i>B. biporus</i>       | -  | -  | -  | -  | -  | -  | -  | -  | -  | -  | -  | -  | -  | -  | -  | -   | -   | -   | L   | -   | -   | A   | P   | -   | -   | -   | -   | -   | I   | -   | H   | -   | - |   |
|                    | <i>A. carolinensis</i>  | -  | -  | -  | -  | -  | -  | -  | -  | -  | -  | -  | -  | -  | -  | -  | -   | -   | -   | -   | -   | -   | -   | -   | -   | -   | -   | -   | -   | -   | -   | -   | -   | - |   |
|                    | <i>O. attenuatus</i>    | -  | -  | -  | -  | -  | -  | -  | -  | -  | -  | -  | -  | -  | -  | -  | -   | -   | -   | L   | -   | -   | -   | -   | -   | -   | -   | -   | -   | -   | -   | -   | -   | - |   |
| <i>V. salvator</i> | -                       | -  | -  | -  | -  | -  | -  | -  | -  | -  | -  | -  | -  | -  | -  | -  | -   | -   | L   | -   | -   | -   | -   | -   | -   | -   | -   | -   | -   | -   | F   | -   | -   |   |   |

Supplementary Table S8. Continued.

|                     |                            | 10 | 13 | 14 | 15 | 16 | 17 | 18 | 80 | 81 | 84 | 85 | 90 | 92 | 97 | 99 | 100 | 102 | 107 | 109 | 111 | 114 | 116 | 141 | 143 | 145 | 147 | 148 | 150 | 155 | 158 | 502 | 504 |   |   |   |
|---------------------|----------------------------|----|----|----|----|----|----|----|----|----|----|----|----|----|----|----|-----|-----|-----|-----|-----|-----|-----|-----|-----|-----|-----|-----|-----|-----|-----|-----|-----|---|---|---|
| <b>Tuatara</b>      | <i>S. punctatus</i>        | -  | -  | -  | -  | -  | -  | -  | -  | -  | -  | -  | -  | -  | -  | -  | -   | -   | -   | -   | -   | T   | A   | P   | -   | -   | -   | -   | -   | -   | -   | -   | L   | - |   |   |
| <b>Crocodylians</b> | <i>C. crocodilus</i>       | -  | -  | -  | -  | -  | -  | -  | -  | -  | -  | -  | -  | -  | -  | -  | -   | -   | -   | -   | -   | -   | -   | P   | -   | -   | -   | -   | -   | -   | -   | -   | -   | - |   |   |
|                     | <i>A. sinensis</i>         | -  | -  | -  | -  | -  | -  | -  | -  | -  | -  | -  | -  | -  | -  | -  | -   | -   | -   | -   | -   | S   | A   | P   | -   | -   | -   | -   | -   | -   | -   | -   | -   | H | - |   |
|                     | <i>A. mississippiensis</i> | -  | -  | -  | -  | -  | -  | -  | -  | -  | -  | -  | -  | -  | -  | -  | -   | -   | -   | -   | -   | S   | A   | P   | -   | -   | -   | -   | -   | -   | -   | -   | -   | - | H | - |
|                     | <i>G. gangeticus</i>       | -  | -  | -  | -  | -  | -  | -  | -  | -  | -  | -  | -  | -  | -  | -  | -   | -   | -   | -   | -   | F   | A   | P   | -   | -   | -   | -   | -   | -   | -   | -   | -   | - | H | - |
|                     | <i>C. moreletii</i>        | -  | -  | -  | -  | -  | -  | -  | -  | -  | -  | -  | -  | -  | -  | -  | -   | -   | -   | -   | -   | F   | A   | P   | -   | -   | -   | -   | -   | -   | -   | -   | -   | - | - |   |
| <b>Turtles</b>      | <i>D. subplana</i>         | -  | -  | -  | -  | -  | -  | -  | -  | -  | -  | -  | -  | -  | -  | -  | -   | -   | -   | L   | -   | T   | -   | -   | -   | -   | -   | -   | -   | -   | -   | -   | -   | - | - |   |
|                     | <i>P. subrufa</i>          | -  | -  | -  | -  | -  | -  | -  | -  | -  | -  | -  | -  | -  | L  | -  | -   | -   | -   | L   | -   | -   | -   | -   | -   | -   | -   | -   | -   | -   | A   | -   | N   | - | - |   |
|                     | <i>C. picta</i>            | -  | -  | -  | -  | -  | -  | -  | -  | -  | -  | M  | -  | -  | -  | -  | -   | -   | -   | L   | -   | -   | -   | -   | -   | -   | -   | -   | -   | -   | -   | -   | -   | - | H | - |
|                     | <i>C. mydas</i>            | -  | -  | -  | -  | -  | -  | -  | -  | -  | -  | -  | -  | -  | -  | -  | -   | -   | -   | L   | -   | -   | -   | -   | -   | -   | -   | -   | -   | -   | -   | -   | -   | - | - | - |
| <b>Birds</b>        | <i>T. major</i>            | -  | -  | -  | -  | -  | -  | -  | -  | -  | -  | -  | -  | -  | -  | -  | -   | -   | -   | -   | -   | -   | -   | P   | -   | -   | -   | -   | -   | -   | -   | -   | -   | - | H | - |
|                     | <i>S. sharpei</i>          | -  | -  | -  | -  | -  | -  | -  | -  | -  | -  | -  | -  | -  | -  | -  | -   | -   | -   | -   | -   | -   | -   | -   | -   | -   | -   | -   | -   | -   | -   | -   | -   | - | - | - |
|                     | <i>C. frugilegus</i>       | -  | -  | -  | -  | -  | -  | -  | -  | -  | -  | -  | -  | -  | -  | -  | -   | -   | -   | -   | -   | -   | -   | -   | -   | -   | -   | -   | -   | -   | -   | I   | -   | F | - | - |
|                     | <i>V. chalybeata</i>       | -  | -  | -  | -  | -  | -  | -  | -  | -  | -  | -  | -  | -  | -  | -  | -   | -   | -   | -   | -   | -   | -   | -   | -   | -   | -   | -   | -   | -   | -   | I   | -   | F | - | - |
|                     | <i>B. buteo</i>            | -  | -  | -  | -  | -  | -  | -  | -  | -  | -  | -  | -  | -  | -  | -  | -   | -   | -   | -   | -   | -   | -   | -   | -   | -   | -   | -   | -   | -   | -   | -   | -   | - | - | - |
|                     | <i>F. peregrinus</i>       | -  | -  | -  | -  | -  | -  | -  | -  | -  | -  | -  | -  | -  | -  | -  | -   | -   | -   | -   | -   | -   | -   | -   | -   | -   | -   | -   | -   | -   | -   | -   | -   | - | - | - |
|                     | <i>D. novaehollandiae</i>  | -  | -  | -  | -  | -  | -  | -  | -  | -  | -  | -  | -  | -  | -  | -  | -   | -   | -   | -   | -   | -   | -   | -   | -   | -   | -   | -   | -   | -   | -   | -   | -   | - | H | - |
|                     | <i>S. camelus</i>          | -  | -  | -  | -  | -  | -  | -  | -  | -  | -  | -  | -  | -  | -  | -  | -   | -   | -   | -   | -   | -   | -   | -   | -   | -   | -   | -   | -   | -   | -   | -   | -   | - | H | - |
|                     | <i>A. haastii</i>          | -  | -  | -  | -  | -  | -  | -  | -  | -  | -  | -  | -  | -  | -  | -  | -   | -   | -   | -   | -   | -   | -   | -   | -   | -   | -   | -   | -   | -   | -   | I   | -   | H | - | - |
|                     | <i>R. americana</i>        | -  | -  | -  | -  | -  | -  | -  | -  | -  | -  | -  | -  | -  | -  | -  | -   | -   | -   | -   | -   | -   | -   | -   | -   | -   | -   | -   | -   | -   | -   | -   | -   | - | H | - |
|                     | <i>G. gallus</i>           | -  | -  | -  | -  | -  | -  | -  | -  | -  | -  | -  | -  | -  | -  | -  | -   | -   | -   | -   | -   | -   | -   | -   | -   | -   | -   | -   | -   | -   | -   | H   | -   | - | - | - |
|                     | <i>C. ciconia</i>          | -  | -  | -  | -  | -  | -  | -  | -  | -  | -  | -  | -  | -  | -  | -  | -   | -   | -   | -   | -   | -   | -   | -   | -   | -   | -   | -   | -   | -   | -   | -   | -   | - | - | - |
|                     | <i>C. boyciana</i>         | -  | -  | -  | -  | -  | -  | -  | -  | -  | -  | -  | -  | -  | -  | -  | -   | -   | -   | -   | -   | -   | -   | -   | -   | -   | -   | -   | -   | -   | -   | -   | -   | - | - | - |
| <b>Amphibians</b>   | <i>M. luschani</i>         | -  | -  | -  | -  | -  | -  | -  | -  | -  | -  | -  | -  | -  | -  | -  | -   | -   | -   | -   | -   | -   | -   | -   | -   | -   | -   | -   | -   | -   | -   | -   | -   | - | - | - |
|                     | <i>X. laevis</i>           | -  | -  | -  | -  | -  | -  | -  | -  | -  | -  | -  | -  | -  | -  | -  | -   | -   | -   | -   | -   | -   | -   | -   | -   | -   | -   | -   | -   | -   | -   | I   | -   | - | - | - |
