# Supplementary material for: Adaptive Evolution and Functional Redesign of Core Metabolic Proteins in Snakes
Source: PubMed Central journal article supplement (PMC2376058; doi:10.1371/journal.pone.0002201), 2008-05-21
Supplement: pone.0002201.s027.pdf [file pone.0002201.s027.pdf]

**Supplementary Table S9.** Conservation of residues surrounding channel H across the 65 taxon dataset used. The symbol “-” refers to amino acids that are the same as the reference sequence of *Bos taurus* at the corresponding site.

|                         |                         | 37                   | 39 | 381 | 383 | 406 | 408 | 412 | 414 | 420 | 423 | 425 | 427 | 429 | 442 | 444 | 450 | 452 | 453 | 455 | 460 | 462 |
|-------------------------|-------------------------|----------------------|----|-----|-----|-----|-----|-----|-----|-----|-----|-----|-----|-----|-----|-----|-----|-----|-----|-----|-----|-----|
| <b>Primates</b>         | <i>B. taurus</i>        | I                    | A  | L   | -   | N   | T   | I   | F   | G   | M   | F   | P   | H   | D   | P   | W   | T   | I   | S   | I   | L   |
|                         | <i>H. lar</i>           | -                    | -  | -   | -   | D   | -   | -   | -   | -   | L   | -   | -   | -   | -   | -   | -   | I   | L   | -   | -   | -   |
|                         | <i>L. catta</i>         | -                    | -  | -   | -   | D   | -   | -   | -   | -   | -   | -   | -   | -   | -   | -   | -   | -   | V   | -   | -   | -   |
|                         | <i>N. coucang</i>       | -                    | -  | -   | -   | D   | -   | -   | -   | -   | L   | -   | -   | -   | -   | -   | -   | -   | S   | -   | -   | -   |
|                         | <i>T. bancanus</i>      | -                    | -  | -   | -   | H   | -   | T   | -   | -   | L   | -   | -   | -   | -   | -   | -   | -   | -   | -   | -   | -   |
|                         | <i>G. gorilla</i>       | -                    | -  | -   | -   | D   | -   | -   | -   | -   | L   | -   | -   | -   | -   | -   | -   | -   | I   | L   | -   | -   |
|                         | <i>H. sapiens</i>       | -                    | -  | -   | -   | D   | -   | -   | -   | -   | L   | -   | -   | -   | -   | -   | -   | -   | I   | L   | -   | -   |
|                         | <i>P. hamadryas</i>     | -                    | -  | -   | -   | D   | -   | A   | -   | -   | L   | -   | -   | -   | -   | -   | -   | -   | I   | L   | -   | -   |
|                         | <i>C. albifrons</i>     | -                    | -  | -   | -   | D   | -   | -   | -   | -   | -   | -   | -   | -   | -   | -   | -   | -   | I   | -   | -   | -   |
|                         | <i>M. sylvanus</i>      | -                    | -  | -   | -   | -   | -   | V   | -   | -   | L   | -   | -   | -   | -   | -   | -   | -   | I   | L   | -   | -   |
|                         | <i>P. pygmaeus</i>      | -                    | -  | -   | -   | -   | -   | -   | -   | -   | L   | -   | -   | -   | -   | -   | -   | -   | I   | L   | -   | -   |
|                         | <i>P. paniscus</i>      | -                    | -  | -   | -   | D   | -   | -   | -   | -   | L   | -   | -   | -   | -   | -   | -   | -   | V   | L   | -   | -   |
|                         | <b>Snakes</b>           | <i>A. piscivorus</i> | M  | M   | -   | -   | -   | -   | T   | -   | -   | -   | -   | -   | -   | -   | -   | -   | -   | -   | -   | -   |
| <i>P. slowinskii</i>    |                         | M                    | M  | -   | -   | -   | -   | T   | -   | -   | -   | -   | -   | -   | -   | -   | -   | -   | L   | -   | -   | M   |
| <i>D. semicarinatus</i> |                         | M                    | M  | -   | -   | -   | -   | T   | -   | -   | -   | -   | -   | -   | -   | -   | -   | -   | M   | -   | -   | M   |
| <i>B. constrictor</i>   |                         | M                    | M  | -   | -   | -   | -   | T   | -   | -   | -   | -   | -   | -   | -   | -   | -   | -   | -   | -   | -   | -   |
| <i>P. regius</i>        |                         | M                    | M  | -   | -   | -   | -   | T   | -   | -   | -   | -   | -   | -   | -   | -   | -   | -   | -   | -   | -   | -   |
| <i>A. granulatus</i>    |                         | M                    | M  | -   | -   | -   | -   | A   | -   | -   | L   | -   | -   | -   | -   | -   | -   | -   | -   | -   | -   | M   |
| <i>C. ruffus</i>        |                         | M                    | M  | -   | -   | -   | -   | T   | -   | -   | -   | -   | -   | -   | -   | -   | -   | -   | -   | V   | -   | -   |
| <i>O. okinavensis</i>   |                         | M                    | M  | -   | -   | -   | -   | T   | -   | -   | -   | -   | -   | -   | -   | -   | -   | -   | -   | -   | -   | -   |
| <i>X. unicolor</i>      |                         | M                    | M  | -   | -   | -   | -   | T   | -   | -   | -   | -   | -   | -   | -   | -   | -   | -   | -   | V   | -   | -   |
| <i>T. reticulatus</i>   |                         | V                    | M  | -   | -   | -   | -   | -   | -   | -   | -   | -   | -   | -   | -   | -   | -   | -   | V   | L   | -   | M   |
| <b>Lizards</b>          | <i>L. dulcis</i>        | -                    | M  | -   | -   | H   | -   | A   | -   | -   | I   | -   | -   | -   | -   | -   | -   | -   | -   | T   | -   | T   |
|                         | <i>I. iguana</i>        | -                    | -  | -   | -   | H   | -   | -   | -   | -   | -   | -   | -   | -   | -   | -   | -   | -   | -   | -   | -   | -   |
|                         | <i>E. egregius</i>      | -                    | -  | -   | -   | H   | -   | -   | -   | -   | L   | -   | -   | -   | -   | -   | -   | -   | M   | -   | -   | -   |
|                         | <i>S. occidentalis</i>  | -                    | -  | -   | -   | H   | -   | -   | -   | -   | -   | -   | -   | -   | -   | -   | -   | -   | -   | V   | -   | -   |
|                         | <i>C. warreni</i>       | -                    | T  | -   | -   | -   | A   | -   | -   | -   | L   | -   | -   | -   | -   | -   | -   | -   | -   | V   | -   | -   |
|                         | <i>A. graminea</i>      | -                    | -  | -   | -   | H   | -   | -   | -   | -   | -   | -   | -   | -   | -   | -   | -   | -   | L   | -   | -   | I   |
|                         | <i>S. crocodilurus</i>  | -                    | -  | -   | -   | H   | A   | -   | -   | -   | -   | -   | -   | -   | -   | -   | -   | -   | A   | -   | -   | -   |
|                         | <i>V. komodoensis</i>   | -                    | -  | -   | -   | H   | L   | -   | -   | -   | -   | -   | -   | -   | -   | -   | -   | -   | A   | L   | -   | -   |
|                         | <i>R. floridana</i>     | -                    | -  | -   | -   | H   | G   | -   | -   | -   | L   | -   | -   | -   | -   | -   | -   | -   | -   | -   | -   | -   |
|                         | <i>G. acutus</i>        | V                    | -  | -   | -   | S   | A   | M   | -   | -   | L   | -   | -   | -   | -   | -   | -   | -   | -   | V   | -   | T   |
|                         | <i>D. zarudnyi</i>      | -                    | -  | -   | -   | -   | -   | M   | -   | -   | -   | -   | -   | -   | -   | -   | -   | -   | -   | V   | -   | T   |
|                         | <i>A. schmidti</i>      | -                    | -  | -   | -   | -   | M   | T   | -   | -   | L   | -   | -   | -   | -   | -   | -   | -   | -   | L   | -   | T   |
|                         | <i>B. tridactylus</i>   | -                    | -  | -   | -   | -   | A   | L   | -   | -   | -   | -   | -   | -   | -   | -   | -   | -   | -   | -   | -   | T   |
|                         | <i>B. canaliculatus</i> | V                    | -  | -   | -   | -   | -   | L   | -   | -   | -   | -   | -   | -   | -   | -   | -   | -   | -   | -   | -   | T   |
|                         | <i>B. biporus</i>       | -                    | -  | -   | -   | S   | -   | L   | -   | -   | -   | -   | -   | -   | -   | -   | -   | -   | -   | V   | V   | T   |
|                         | <i>A. carolinensis</i>  | -                    | -  | -   | -   | H   | A   | A   | -   | -   | L   | -   | -   | -   | -   | -   | -   | -   | A   | -   | -   | -   |
|                         | <i>O. attenuatus</i>    | -                    | -  | -   | -   | H   | -   | V   | -   | -   | -   | -   | -   | -   | -   | -   | -   | -   | I   | -   | -   | I   |
| <i>V. salvator</i>      | -                       | -                    | -  | -   | H   | L   | -   | -   | -   | -   | -   | -   | -   | -   | -   | -   | -   | -   | L   | -   | -   |     |

Supplementary Table S9. Continued.

|                     |                            | 37 | 39 | 381 | 383 | 406 | 408 | 412 | 414 | 420 | 423 | 425 | 427 | 429 | 442 | 444 | 450 | 452 | 453 | 455 | 460 | 462 |
|---------------------|----------------------------|----|----|-----|-----|-----|-----|-----|-----|-----|-----|-----|-----|-----|-----|-----|-----|-----|-----|-----|-----|-----|
| <b>Tuatara</b>      | <i>S. punctatus</i>        | -  | G  | -   | -   | H   | -   | V   | -   | -   | L   | -   | -   | -   | -   | -   | -   | -   | L   | -   | -   | -   |
| <b>Crocodylians</b> | <i>C. crocodilus</i>       | -  | T  | -   | -   | H   | -   | -   | -   | -   | F   | -   | -   | -   | -   | -   | -   | L   | T   | -   | -   | -   |
|                     | <i>A. sinensis</i>         | -  | T  | -   | -   | T   | H   | -   | -   | -   | F   | -   | -   | -   | -   | -   | -   | L   | L   | -   | -   | M   |
|                     | <i>A. mississippiensis</i> | -  | T  | -   | -   | H   | -   | -   | -   | -   | F   | -   | -   | -   | -   | -   | -   | L   | T   | -   | -   | M   |
|                     | <i>G. gangeticus</i>       | -  | T  | -   | -   | H   | M   | T   | -   | -   | L   | -   | -   | -   | -   | -   | -   | M   | -   | -   | -   | M   |
|                     | <i>C. moreletii</i>        | -  | T  | -   | -   | H   | -   | -   | -   | -   | L   | -   | -   | -   | -   | -   | -   | M   | -   | -   | -   | M   |
| <b>Turtles</b>      | <i>D. subplana</i>         | -  | -  | -   | -   | H   | -   | V   | -   | -   | -   | -   | -   | -   | -   | -   | -   | -   | -   | -   | -   | -   |
|                     | <i>P. subrufa</i>          | -  | T  | -   | -   | H   | -   | -   | -   | -   | L   | -   | -   | -   | -   | -   | -   | S   | -   | -   | -   | -   |
|                     | <i>C. picta</i>            | -  | -  | -   | -   | H   | -   | V   | -   | -   | -   | -   | -   | -   | -   | -   | -   | S   | -   | -   | -   | -   |
|                     | <i>C. mydas</i>            | -  | -  | -   | -   | H   | -   | V   | -   | -   | -   | -   | -   | -   | -   | -   | -   | S   | -   | -   | -   | M   |
| <b>Birds</b>        | <i>T. major</i>            | -  | -  | -   | -   | H   | -   | A   | -   | -   | L   | -   | -   | -   | -   | -   | -   | -   | V   | -   | -   | M   |
|                     | <i>S. sharpei</i>          | -  | -  | -   | -   | H   | -   | A   | -   | -   | L   | -   | -   | -   | -   | -   | -   | -   | L   | -   | -   | M   |
|                     | <i>C. frugilegus</i>       | -  | -  | -   | -   | H   | -   | -   | -   | -   | L   | -   | -   | -   | -   | -   | -   | -   | -   | -   | -   | -   |
|                     | <i>V. chalybeata</i>       | -  | -  | -   | -   | H   | -   | T   | -   | -   | L   | -   | -   | -   | -   | -   | -   | -   | -   | -   | -   | -   |
|                     | <i>B. buteo</i>            | -  | -  | -   | -   | H   | -   | A   | -   | -   | L   | -   | -   | -   | -   | -   | -   | -   | L   | -   | -   | M   |
|                     | <i>F. peregrinus</i>       | -  | T  | -   | -   | H   | -   | T   | -   | -   | L   | -   | -   | -   | -   | -   | -   | -   | L   | -   | -   | M   |
|                     | <i>D. novaehollandiae</i>  | -  | -  | -   | -   | H   | -   | A   | -   | -   | L   | -   | -   | -   | -   | -   | -   | -   | L   | -   | -   | M   |
|                     | <i>S. camelus</i>          | -  | -  | -   | -   | H   | -   | A   | -   | -   | L   | -   | -   | -   | -   | -   | -   | -   | M   | -   | -   | M   |
|                     | <i>A. haastii</i>          | -  | -  | -   | -   | H   | -   | A   | -   | -   | L   | -   | -   | -   | -   | -   | -   | -   | M   | -   | -   | M   |
|                     | <i>R. americana</i>        | -  | -  | -   | -   | H   | -   | A   | -   | -   | L   | -   | -   | -   | -   | -   | -   | -   | M   | -   | -   | M   |
|                     | <i>G. gallus</i>           | -  | -  | -   | -   | H   | S   | A   | -   | -   | L   | -   | -   | -   | -   | -   | -   | -   | L   | -   | -   | M   |
|                     | <i>C. ciconia</i>          | -  | -  | -   | -   | H   | -   | T   | -   | -   | L   | -   | -   | -   | -   | -   | -   | -   | M   | -   | -   | M   |
|                     | <i>C. boyciana</i>         | -  | -  | -   | -   | H   | -   | T   | -   | -   | L   | -   | -   | -   | -   | -   | -   | -   | M   | -   | -   | M   |
| <b>Amphibians</b>   | <i>M. luschani</i>         | -  | -  | -   | -   | H   | V   | -   | -   | -   | L   | -   | -   | -   | -   | -   | -   | -   | -   | -   | -   | -   |
|                     | <i>X. laevis</i>           | -  | -  | -   | -   | H   | -   | -   | -   | -   | L   | -   | -   | -   | -   | -   | -   | -   | V   | -   | -   | -   |
