# Supplementary material for: Adaptive Evolution and Functional Redesign of Core Metabolic Proteins in Snakes
Source: PubMed Central journal article supplement (PMC2376058; doi:10.1371/journal.pone.0002201), 2008-05-21
Supplement: pone.0002201.s028.pdf [file pone.0002201.s028.pdf]

**Supplementary Table S10.** Conservation of residues surrounding channel K across the 65 taxon dataset used. The symbol “-” refers to amino acids that are the same as the reference sequence of *Bos taurus* at the corresponding site.

|                         |                         | 182                  | 183 | 239 | 241 | 243 | 245 | 254 | 257 | 264 | 266 | 290 | 292 | 315 | 317 | 318 | 320 | 367 | 369 | 488 | 492 |   |
|-------------------------|-------------------------|----------------------|-----|-----|-----|-----|-----|-----|-----|-----|-----|-----|-----|-----|-----|-----|-----|-----|-----|-----|-----|---|
| <b>Primates</b>         | <i>B. taurus</i>        | P                    | L   | G   | P   | V   | I   | I   | I   | K   | E   | H   | M   | P   | G   | V   | V   | L   | D   | T   | L   |   |
|                         | <i>H. lar</i>           | -                    | -   | -   | -   | -   | -   | -   | -   | -   | -   | -   | -   | -   | -   | -   | -   | -   | -   | -   | P   | - |
|                         | <i>L. catta</i>         | -                    | -   | -   | -   | -   | -   | -   | -   | -   | -   | -   | -   | -   | -   | -   | -   | -   | -   | -   | -   | - |
|                         | <i>N. coucang</i>       | -                    | -   | -   | -   | -   | -   | -   | -   | -   | -   | -   | -   | -   | -   | -   | -   | -   | -   | -   | -   | - |
|                         | <i>T. bancanus</i>      | -                    | -   | -   | -   | -   | -   | -   | -   | -   | -   | -   | -   | -   | -   | -   | -   | -   | -   | -   | P   | - |
|                         | <i>G. gorilla</i>       | -                    | -   | -   | -   | -   | -   | -   | -   | -   | -   | -   | -   | -   | -   | -   | -   | -   | -   | -   | P   | - |
|                         | <i>H. sapiens</i>       | -                    | -   | -   | -   | -   | -   | -   | -   | -   | -   | -   | -   | -   | -   | -   | -   | -   | -   | -   | P   | - |
|                         | <i>P. hamadryas</i>     | -                    | -   | -   | -   | -   | -   | -   | -   | -   | -   | -   | -   | -   | -   | -   | -   | -   | -   | -   | P   | - |
|                         | <i>C. albifrons</i>     | -                    | -   | -   | -   | -   | -   | -   | -   | -   | -   | -   | -   | -   | -   | -   | -   | -   | -   | -   | M   | - |
|                         | <i>M. sylvanus</i>      | -                    | -   | -   | -   | -   | -   | V   | -   | -   | -   | -   | -   | -   | -   | -   | -   | -   | -   | -   | P   | - |
|                         | <i>P. pygmaeus</i>      | -                    | -   | -   | -   | -   | -   | -   | -   | -   | -   | -   | -   | -   | -   | -   | -   | -   | -   | -   | P   | - |
|                         | <i>P. paniscus</i>      | -                    | -   | -   | -   | -   | -   | -   | -   | -   | -   | -   | -   | -   | -   | -   | -   | -   | -   | -   | P   | - |
|                         | <b>Snakes</b>           | <i>A. piscivorus</i> | -   | -   | -   | -   | -   | -   | -   | -   | -   | N   | -   | -   | -   | -   | I   | -   | -   | -   | K   | I |
| <i>P. slowinskii</i>    |                         | -                    | -   | -   | -   | -   | -   | V   | -   | -   | N   | -   | -   | -   | -   | I   | -   | -   | -   | K   | V   |   |
| <i>D. semicarinatus</i> |                         | -                    | -   | -   | -   | -   | -   | -   | -   | -   | N   | -   | -   | -   | -   | I   | -   | -   | -   | K   | V   |   |
| <i>B. constrictor</i>   |                         | -                    | -   | -   | -   | -   | -   | -   | -   | -   | N   | -   | -   | -   | -   | I   | -   | -   | -   | K   | V   |   |
| <i>P. regius</i>        |                         | -                    | -   | -   | -   | -   | -   | -   | -   | -   | N   | -   | -   | -   | -   | I   | -   | -   | -   | K   | V   |   |
| <i>A. granulatus</i>    |                         | -                    | -   | -   | -   | -   | -   | -   | -   | -   | N   | -   | -   | -   | -   | I   | -   | -   | -   | K   | V   |   |
| <i>C. ruffus</i>        |                         | -                    | -   | -   | -   | -   | -   | V   | -   | -   | N   | -   | -   | -   | -   | I   | -   | -   | -   | K   | V   |   |
| <i>O. okinavensis</i>   |                         | -                    | -   | -   | -   | -   | -   | -   | -   | -   | N   | -   | -   | -   | -   | I   | -   | -   | -   | K   | I   |   |
| <i>X. unicolor</i>      |                         | -                    | -   | -   | -   | -   | -   | -   | -   | -   | N   | -   | -   | -   | -   | I   | -   | -   | -   | K   | V   |   |
| <i>T. reticulatus</i>   |                         | -                    | -   | -   | -   | -   | -   | -   | V   | -   | -   | -   | -   | -   | -   | I   | -   | -   | -   | M   | I   |   |
| <i>L. dulcis</i>        |                         | -                    | -   | -   | -   | -   | -   | -   | -   | V   | -   | -   | -   | -   | -   | I   | -   | -   | -   | -   | -   | T |
| <b>Lizards</b>          | <i>I. iguana</i>        | -                    | -   | -   | -   | -   | -   | -   | -   | -   | -   | -   | -   | -   | -   | -   | -   | -   | -   | -   | -   |   |
|                         | <i>E. egregius</i>      | -                    | -   | -   | -   | -   | -   | -   | -   | -   | -   | -   | -   | -   | -   | -   | -   | -   | -   | -   | -   |   |
|                         | <i>S. occidentalis</i>  | -                    | -   | -   | -   | -   | -   | -   | -   | -   | -   | -   | -   | -   | -   | -   | -   | -   | -   | -   | -   |   |
|                         | <i>C. warreni</i>       | -                    | -   | -   | -   | -   | -   | -   | -   | -   | -   | -   | -   | -   | -   | -   | -   | -   | -   | -   | -   |   |
|                         | <i>A. graminea</i>      | -                    | -   | -   | -   | -   | -   | -   | -   | -   | -   | -   | -   | -   | -   | -   | -   | -   | -   | -   | V   |   |
|                         | <i>S. crocodilurus</i>  | -                    | -   | -   | -   | -   | -   | -   | V   | -   | -   | -   | -   | -   | -   | -   | -   | -   | -   | -   | -   |   |
|                         | <i>V. komodoensis</i>   | -                    | -   | -   | -   | -   | -   | -   | -   | -   | -   | -   | -   | -   | -   | I   | -   | -   | -   | P   | -   |   |
|                         | <i>R. floridana</i>     | -                    | -   | -   | -   | -   | -   | -   | -   | -   | -   | -   | -   | -   | -   | -   | -   | -   | -   | -   | A   |   |
|                         | <i>G. acutus</i>        | -                    | -   | -   | -   | -   | -   | -   | -   | -   | -   | -   | -   | -   | -   | I   | -   | -   | -   | P   | -   |   |
|                         | <i>D. zarudnyi</i>      | -                    | -   | -   | -   | -   | -   | -   | -   | -   | -   | -   | -   | -   | -   | I   | -   | -   | -   | -   | -   |   |
|                         | <i>A. schmidti</i>      | -                    | -   | -   | -   | -   | -   | -   | -   | -   | -   | -   | -   | -   | -   | I   | -   | -   | -   | -   | -   |   |
|                         | <i>B. tridactylus</i>   | -                    | -   | -   | -   | -   | -   | -   | -   | -   | -   | -   | -   | -   | -   | I   | -   | -   | -   | -   | -   |   |
|                         | <i>B. canaliculatus</i> | -                    | -   | -   | -   | -   | -   | -   | -   | -   | -   | -   | -   | -   | -   | I   | -   | -   | -   | -   | -   |   |
|                         | <i>B. biporus</i>       | -                    | -   | -   | -   | -   | -   | -   | -   | -   | -   | -   | -   | -   | -   | I   | -   | -   | -   | -   | -   |   |
|                         | <i>A. carolinensis</i>  | -                    | -   | -   | -   | -   | -   | -   | -   | -   | -   | -   | -   | -   | -   | -   | -   | -   | -   | -   | A   |   |
|                         | <i>O. attenuatus</i>    | -                    | -   | -   | -   | -   | -   | -   | -   | -   | -   | -   | -   | -   | -   | -   | -   | -   | -   | -   | -   |   |
|                         | <i>V. salvator</i>      | -                    | -   | -   | -   | -   | -   | -   | -   | -   | -   | -   | -   | -   | -   | I   | -   | -   | -   | P   | -   |   |
