# Supplementary material for: Adaptive Evolution and Functional Redesign of Core Metabolic Proteins in Snakes
Source: PLoS One. 2008 May 21;3(5):e2201. doi: 10.1371/journal.pone.0002201 (PMC2376058; doi:10.1371/journal.pone.0002201)
Supplement: Table S5 — Conservation of residues in proton transfer channel D across the 65 taxon dataset used. (0.08 MB PDF) [file pone.0002201.s023.pdf]

**Supplementary Table S5.** Conservation of residues in proton transfer channel D across the 65 taxon dataset used. The symbol “-” refers to amino acids that are the same as the sequence of *Bos taurus* at the corresponding site.

[illegible]
